# Supplementary material
Source: publisher figshare collection journal article supplement (https://gsajournals.figshare.com/articles/dataset/_/6957152)
Supplement: Supplementary file 1 [file 1]

## Sheet: CAVIARresults_combined_v3_annot
Table S9: Credible sets.
CHR	SNP	BP	A1	A2	Posterior Inclusion Probability	Cumulative Inclusion Probability	loci
1	rs1074657	243746634	T	C	0.0592013	0.0592013	AKT3
1	rs35978510	243776117	T	C	0.0282604	0.0874618	AKT3
1	rs13376709	243690491	T	C	0.0250921	0.112554	AKT3
1	rs12144559	243723214	C	A	0.0239631	0.136517	AKT3
1	rs2125231	243762299	T	C	0.0221612	0.158678	AKT3
1	rs4603115	243816636	T	C	0.0206381	0.179316	AKT3
1	rs2085555	243744321	T	C	0.019294	0.19861	AKT3
1	rs12136847	243747358	A	G	0.0190661	0.217676	AKT3
1	rs55778834	243753910	T	C	0.0189122	0.236589	AKT3
1	rs7549780	243712455	A	C	0.0187175	0.255306	AKT3
1	rs12119594	243743379	C	G	0.0186131	0.273919	AKT3
1	rs3856231	243768906	T	C	0.0184742	0.292393	AKT3
1	rs2125233	243748629	C	T	0.0184509	0.310844	AKT3
1	rs12735854	243748184	G	C	0.0177951	0.328639	AKT3
1	rs10927056	243822570	T	C	0.0177294	0.346369	AKT3
1	rs61833200	243779250	C	G	0.0176219	0.363991	AKT3
1	rs2291409	243732197	G	A	0.017538	0.381529	AKT3
1	rs10927044	243767493	G	A	0.0171837	0.398712	AKT3
1	rs12744297	243734296	G	A	0.0169358	0.415648	AKT3
1	rs12138722	243802639	T	A	0.0166632	0.432311	AKT3
1	rs12691547	243819070	A	G	0.0156266	0.447938	AKT3
1	rs12691548	243820128	A	G	0.0154692	0.463407	AKT3
1	rs11578459	243770727	A	G	0.0154296	0.478837	AKT3
1	rs12143602	243744904	G	A	0.0147535	0.49359	AKT3
1	rs12141946	243811634	T	G	0.0142921	0.507882	AKT3
1	rs10927055	243815781	A	G	0.0130455	0.520928	AKT3
1	rs2220276	243717592	A	T	0.0129182	0.533846	AKT3
1	rs4658588	243846271	A	G	0.0126059	0.546452	AKT3
1	rs12117580	243826674	T	C	0.0118202	0.558272	AKT3
1	rs2125232	243759210	C	T	0.0110985	0.569371	AKT3
1	rs2034915	243878503	A	G	0.0110033	0.580374	AKT3
1	rs4658585	243803922	G	A	0.0109073	0.591281	AKT3
1	rs1352162	243717682	A	G	0.0106571	0.601939	AKT3
1	rs6688135	243743474	C	A	0.0105769	0.612515	AKT3
1	rs12749316	243792781	G	A	0.00993788	0.622453	AKT3
1	rs6681024	243741246	C	T	0.00957065	0.632024	AKT3
1	rs7528450	243789305	T	A	0.0090072	0.641031	AKT3
1	rs11589907	243818260	T	C	0.00898979	0.650021	AKT3
1	rs10927060	243875989	A	G	0.00893401	0.658955	AKT3
1	rs12739344	243791312	G	C	0.0088483	0.667803	AKT3
1	rs12144546	243883877	T	G	0.00874886	0.676552	AKT3
1	rs10158176	243741754	T	A	0.00852769	0.68508	AKT3
1	rs10927045	243786335	G	C	0.00789888	0.692979	AKT3
1	rs7547861	243810582	C	T	0.00703838	0.700017	AKT3
1	rs10927058	243838630	T	C	0.00700198	0.707019	AKT3
1	rs10927052	243808483	C	A	0.00687948	0.713899	AKT3
1	rs1458021	243901970	C	T	0.00671139	0.72061	AKT3
1	rs10754806	243770135	A	C	0.00635882	0.726969	AKT3
1	rs7552061	243807368	T	A	0.00613598	0.733105	AKT3
1	rs2345284	243760328	C	T	0.00572392	0.738829	AKT3
1	rs11585986	243792591	G	C	0.00571814	0.744547	AKT3
1	rs12138753	243795607	G	A	0.00557858	0.750125	AKT3
1	rs2087072	243829549	G	A	0.00551921	0.755645	AKT3
1	rs320308	243780198	A	G	0.00546871	0.761113	AKT3
1	rs1973284	243856681	A	G	0.00533718	0.76645	AKT3
1	rs2290753	243806438	G	A	0.00532912	0.77178	AKT3
1	rs78059248	243814039	C	G	0.00493573	0.776715	AKT3
1	rs2125229	243877648	C	A	0.00439125	0.781107	AKT3
1	rs1458022	243886295	C	T	0.00422823	0.785335	AKT3
1	rs6686591	243853830	C	T	0.00418654	0.789521	AKT3
1	rs10803151	243827672	G	T	0.00404295	0.793564	AKT3
1	rs1486472	243803714	G	A	0.00387017	0.797434	AKT3
1	rs10158245	243833397	A	C	0.00374464	0.801179	AKT3
1	rs320313	243788577	A	G	0.00355086	0.80473	AKT3
1	rs4658590	243908796	A	T	0.00350225	0.808232	AKT3
1	rs3006942	243694783	G	C	0.00348739	0.81172	AKT3
1	rs11582242	243822192	C	A	0.00347678	0.815196	AKT3
1	rs1809247	243882064	C	T	0.00341313	0.81861	AKT3
1	rs320334	243808032	A	T	0.00338015	0.82199	AKT3
1	rs6704286	243678389	T	G	0.00336385	0.825354	AKT3
1	rs10803149	243818286	A	T	0.00312708	0.828481	AKT3
1	rs4610997	243946917	T	A	0.00307895	0.83156	AKT3
1	rs320317	243753153	A	T	0.00303377	0.834593	AKT3
1	rs320323	243752002	C	T	0.0030292	0.837623	AKT3
1	rs7523198	243702266	C	T	0.00296215	0.840585	AKT3
1	rs9428581	243769312	G	A	0.00293895	0.843524	AKT3
1	rs72761606	243740445	C	T	0.00285094	0.846375	AKT3
1	rs7552982	243737428	C	T	0.00280267	0.849177	AKT3
1	rs897959	243897774	C	T	0.00280109	0.851978	AKT3
1	rs12125920	243911397	A	C	0.00278565	0.854764	AKT3
1	rs946824	243684019	T	C	0.00276168	0.857526	AKT3
1	rs12743000	243922374	G	A	0.00274877	0.860274	AKT3
1	rs7517732	243821364	T	C	0.00271206	0.862986	AKT3
1	rs7551241	243943907	A	G	0.002695	0.865681	AKT3
1	rs1545654	243916478	A	T	0.00269248	0.868374	AKT3
1	rs383701	243842288	G	A	0.00263994	0.871014	AKT3
1	rs7548254	243891570	C	T	0.00263553	0.873649	AKT3
1	rs4658403	243832560	C	T	0.00263147	0.876281	AKT3
1	rs3753549	243722892	C	T	0.00257913	0.87886	AKT3
1	rs6661818	243813285	G	T	0.00257221	0.881432	AKT3
1	rs10927036	243708470	C	G	0.00252168	0.883954	AKT3
1	rs320303	243861740	T	A	0.00250502	0.886459	AKT3
1	rs320302	243761735	G	A	0.00245927	0.888918	AKT3
1	rs6429435	243945131	T	C	0.00245367	0.891372	AKT3
1	rs12142652	243953583	A	G	0.00241469	0.893787	AKT3
1	rs11586029	243910067	C	T	0.00241402	0.896201	AKT3
1	rs10803155	243894782	A	G	0.00239337	0.898594	AKT3
1	rs6682456	243942463	C	A	0.00238168	0.900976	AKT3
1	rs4639743	243946072	G	A	0.00234306	0.903319	AKT3
1	rs6699821	244000200	G	A	0.00228584	0.905605	AKT3
1	rs1531243	243852498	T	C	0.00225937	0.907864	AKT3
1	rs7512207	243964992	C	T	0.00225012	0.910114	AKT3
1	rs6657813	243779266	A	T	0.00224179	0.912356	AKT3
1	rs426182	243775450	T	A	0.00220779	0.914564	AKT3
1	rs320316	243790947	G	A	0.00210967	0.916673	AKT3
1	rs320314	243788605	C	T	0.00209592	0.918769	AKT3
1	rs1531244	243939970	A	G	0.00199646	0.920766	AKT3
1	rs320318	243832330	T	G	0.00196395	0.92273	AKT3
1	rs320304	243861642	C	T	0.00187795	0.924608	AKT3
1	rs320309	243781174	G	A	0.00185174	0.926459	AKT3
1	rs2345994	243932275	T	C	0.00185009	0.928309	AKT3
1	rs7542018	243972240	G	A	0.00184633	0.930156	AKT3
1	rs971285	243919773	G	A	0.00182245	0.931978	AKT3
1	rs4484910	243983166	C	T	0.00178018	0.933758	AKT3
1	rs1486475	243868398	T	C	0.00176853	0.935527	AKT3
1	rs320338	243814489	G	A	0.00175874	0.937286	AKT3
1	rs6429438	243987674	A	G	0.0016315	0.938917	AKT3
1	rs60899765	243716824	C	T	0.00161879	0.940536	AKT3
1	rs7553458	243954652	A	G	0.00161266	0.942149	AKT3
1	rs7514510	243891327	A	G	0.00160199	0.943751	AKT3
1	rs320345	243865303	A	G	0.00154546	0.945296	AKT3
1	rs10927075	243956120	A	T	0.00153846	0.946835	AKT3
1	rs1870272	243924743	T	A	0.00152038	0.948355	AKT3
1	rs167661	243828306	T	A	0.00147957	0.949834	AKT3
1	rs897960	243933568	G	A	0.00147861	0.951313	AKT3
2	rs1396141	41673745	C	T	0.0245447	0.0245447	...
2	rs6544423	41670350	A	C	0.0178837	0.0424284	...
2	rs6544421	41660965	C	T	0.0174902	0.0599186	...
2	rs4645044	41672477	T	A	0.0172878	0.0772064	...
2	rs6544422	41661278	A	G	0.0162683	0.0934747	...
2	rs66526545	41660810	T	C	0.0156433	0.109118	...
2	rs4465806	41760960	T	G	0.0126252	0.121743	...
2	rs4952364	41641558	A	C	0.0123042	0.134047	...
2	rs1508123	41654633	T	A	0.0117534	0.145801	...
2	rs1157103	41659303	C	T	0.011649	0.15745	...
2	rs4245774	41671495	T	C	0.011574	0.169024	...
2	rs906553	41670914	T	A	0.0112376	0.180261	...
2	rs1354984	41642045	A	C	0.0111179	0.191379	...
2	rs1508120	41643650	A	C	0.0108733	0.202253	...
2	rs1848374	41704927	C	G	0.0105331	0.212786	...
2	rs4952462	41636754	T	G	0.010395	0.223181	...
2	rs4952464	41646813	G	A	0.010317	0.233498	...
2	rs6544448	41762517	C	G	0.0101725	0.24367	...
2	rs7561525	41679090	C	T	0.0100972	0.253767	...
2	rs12617143	41651141	C	T	0.0100716	0.263839	...
2	rs1508132	41672116	C	T	0.0100621	0.273901	...
2	rs1396133	41617969	C	T	0.00991814	0.283819	...
2	rs1354982	41641880	G	C	0.00985663	0.293676	...
2	rs12616486	41620948	C	G	0.00943045	0.303106	...
2	rs7574300	41670280	A	G	0.00941589	0.312522	...
2	rs7606631	41717577	C	T	0.00920518	0.321727	...
2	rs12616506	41650940	G	A	0.00911854	0.330846	...
2	rs1354983	41642035	C	G	0.00901464	0.33986	...
2	rs11903868	41681848	A	G	0.0089213	0.348782	...
2	rs2888791	41670981	C	T	0.00890564	0.357687	...
2	rs6755853	41711468	C	T	0.00878807	0.366475	...
2	rs906549	41653824	C	T	0.00875238	0.375228	...
2	rs872037	41641357	A	C	0.00873957	0.383967	...
2	rs11124811	41638727	A	T	0.00863239	0.3926	...
2	rs75339380	41651229	G	C	0.00855449	0.401154	...
2	rs7568544	41647394	T	C	0.00840172	0.409556	...
2	rs1508119	41640295	T	C	0.00799191	0.417548	...
2	rs868216	41628085	A	G	0.00751199	0.42506	...
2	rs2374236	41692508	C	T	0.00730566	0.432366	...
2	rs2068390	41603674	T	C	0.00724949	0.439615	...
2	rs7573289	41622198	G	A	0.00717499	0.44679	...
2	rs7599201	41722969	A	T	0.00716637	0.453956	...
2	rs1396140	41733226	A	G	0.00690994	0.460866	...
2	rs906551	41654363	T	C	0.00680803	0.467674	...
2	rs2135998	41619639	G	T	0.00653281	0.474207	...
2	rs1911703	41698981	A	G	0.00633926	0.480546	...
2	rs7562262	41619386	G	T	0.00630988	0.486856	...
2	rs6713831	41720702	C	T	0.00620665	0.493063	...
2	rs4985347	41761251	G	A	0.00605948	0.499122	...
2	rs7575965	41619261	T	A	0.00589616	0.505019	...
2	rs10172767	41638495	T	C	0.00576788	0.510787	...
2	rs6754258	41723500	A	T	0.0057442	0.516531	...
2	rs1848377	41726646	C	G	0.00573475	0.522265	...
2	rs12052737	41616692	T	C	0.00556213	0.527828	...
2	rs6753523	41698799	A	G	0.00551488	0.533342	...
2	rs8179700	41700571	G	A	0.00550053	0.538843	...
2	rs4952488	41759653	G	C	0.0054684	0.544311	...
2	rs6544432	41723200	A	G	0.00537117	0.549683	...
2	rs2063180	41618436	T	G	0.00536613	0.555049	...
2	rs10199543	41648596	A	C	0.00536086	0.56041	...
2	rs1508122	41647688	A	G	0.00527197	0.565682	...
2	rs4985349	41757447	A	G	0.00518659	0.570868	...
2	rs2048180	41618442	A	C	0.00511438	0.575983	...
2	rs4247680	41771956	G	C	0.00507372	0.581056	...
2	rs4247679	41757294	C	T	0.00467746	0.585734	...
2	rs6544414	41615490	A	C	0.00442384	0.590158	...
2	rs2063178	41712482	A	G	0.00439257	0.59455	...
2	rs906548	41653695	C	T	0.00434739	0.598898	...
2	rs1354978	41616349	C	T	0.00428346	0.603181	...
2	rs6724722	41610840	A	C	0.00422062	0.607402	...
2	rs4985344	41770902	C	G	0.00420676	0.611608	...
2	rs4985343	41771291	C	T	0.00417763	0.615786	...
2	rs6544426	41696534	G	T	0.0041039	0.61989	...
2	rs7602755	41686326	G	A	0.00403746	0.623927	...
2	rs12998773	41611585	A	G	0.0039454	0.627873	...
2	rs1605560	41595236	C	A	0.0039102	0.631783	...
2	rs967569	41616346	C	T	0.00371001	0.635493	...
2	rs2888778	41608611	T	G	0.00367185	0.639165	...
2	rs7560726	41594151	C	G	0.00348517	0.64265	...
2	rs10183295	41612038	T	C	0.00346621	0.646116	...
2	rs6737264	41606847	C	T	0.00340081	0.649517	...
2	rs1911701	41651732	T	C	0.00339787	0.652915	...
2	rs10170917	41611889	G	C	0.00339498	0.65631	...
2	rs12620135	41765946	G	T	0.00334219	0.659652	...
2	rs976160	41695142	G	A	0.00329098	0.662943	...
2	rs62138515	41660782	G	A	0.00327825	0.666221	...
2	rs7584371	41581176	T	C	0.00322674	0.669448	...
2	rs7573175	41675318	A	T	0.00306386	0.672512	...
2	rs11124812	41685304	A	C	0.00301132	0.675523	...
2	rs13004610	41608862	T	C	0.00299627	0.678519	...
2	rs7560527	41675069	T	C	0.00297373	0.681493	...
2	rs7591942	41594033	T	C	0.00280865	0.684302	...
2	rs2217363	41799039	C	T	0.0027272	0.687029	...
2	rs6544428	41719233	T	C	0.00271196	0.689741	...
2	rs12105701	41737200	C	T	0.00264503	0.692386	...
2	rs7596089	41674262	G	A	0.00259026	0.694976	...
2	rs1508109	41705032	T	C	0.00258499	0.697561	...
2	rs62138514	41660720	G	A	0.00246596	0.700027	...
2	rs10207399	41638355	G	A	0.00244462	0.702472	...
2	rs4952467	41660109	G	A	0.00242949	0.704901	...
2	rs6714951	41680730	C	T	0.00230716	0.707209	...
2	rs4459777	41685976	G	A	0.00229632	0.709505	...
2	rs6712352	41732787	A	C	0.00228173	0.711787	...
2	rs1508126	41658704	T	G	0.00226247	0.714049	...
2	rs1995740	41637597	A	G	0.00226022	0.716309	...
2	rs1995739	41637518	T	A	0.00225386	0.718563	...
2	rs2063179	41574085	T	C	0.00225181	0.720815	...
2	rs1030501	41772255	C	A	0.00216516	0.72298	...
2	rs1396136	41631901	C	T	0.00216092	0.725141	...
2	rs2374234	41679964	T	G	0.00215564	0.727297	...
2	rs6544424	41683041	C	G	0.0021185	0.729415	...
2	rs10495891	41617543	C	T	0.00211336	0.731529	...
2	rs12470367	41691273	G	A	0.00207648	0.733605	...
2	rs6738061	41682638	T	C	0.00207618	0.735681	...
2	rs6748051	41644732	G	A	0.00206407	0.737745	...
2	rs6544417	41636056	T	C	0.00206113	0.739806	...
2	rs6708515	41606931	A	G	0.00205425	0.741861	...
2	rs2135999	41629001	C	T	0.00201861	0.743879	...
2	rs2374238	41622670	T	C	0.00199699	0.745876	...
2	rs4952468	41671386	G	A	0.00199389	0.74787	...
2	rs7582345	41635180	G	C	0.00198879	0.749859	...
2	rs6755937	41676539	G	A	0.0019794	0.751838	...
2	rs13023934	41734873	T	C	0.00197897	0.753817	...
2	rs869866	41670662	A	C	0.00195897	0.755776	...
2	rs4245773	41633243	C	T	0.00195593	0.757732	...
2	rs12712761	41646225	G	C	0.00194764	0.75968	...
2	rs4952463	41636880	C	A	0.00194508	0.761625	...
2	rs4281951	41633689	T	C	0.00193436	0.763559	...
2	rs6723137	41682775	C	T	0.00192056	0.76548	...
2	rs869865	41670653	T	C	0.00191512	0.767395	...
2	rs4985342	41771319	C	A	0.00191008	0.769305	...
2	rs4952357	41578541	A	T	0.00190606	0.771211	...
2	rs1995738	41637415	T	G	0.00189645	0.773108	...
2	rs4952361	41636627	G	A	0.0018938	0.775001	...
2	rs1508117	41630652	G	C	0.00189174	0.776893	...
2	rs12474614	41721609	T	C	0.00187597	0.778769	...
2	rs2374233	41678292	C	T	0.00187048	0.78064	...
2	rs1508118	41630684	A	G	0.0018566	0.782496	...
2	rs10211187	41639847	G	A	0.00185305	0.784349	...
2	rs10172491	41638194	T	C	0.00185127	0.7862	...
2	rs7578868	41690425	T	A	0.00184565	0.788046	...
2	rs4387846	41679954	G	C	0.00183664	0.789883	...
2	rs7577902	41616956	A	G	0.001827	0.79171	...
2	rs4281952	41633705	T	C	0.00182591	0.793536	...
2	rs6544418	41646513	A	G	0.00181093	0.795347	...
2	rs12712776	41750522	G	A	0.00180483	0.797151	...
2	rs4952461	41636537	T	C	0.00180095	0.798952	...
2	rs7561570	41749964	G	A	0.00180091	0.800753	...
2	rs4952485	41747608	T	C	0.00178988	0.802543	...
2	rs13014427	41637021	C	A	0.001789	0.804332	...
2	rs4408765	41690066	C	A	0.00177714	0.806109	...
2	rs1508130	41601800	T	C	0.00177556	0.807885	...
2	rs7371338	41631931	T	C	0.00177458	0.809659	...
2	rs1396137	41632183	C	T	0.00177242	0.811432	...
2	rs1396139	41632388	T	A	0.00177077	0.813203	...
2	rs6746520	41633989	C	T	0.00174288	0.814946	...
2	rs12105327	41628463	C	T	0.00174218	0.816688	...
2	rs1588186	41634573	C	G	0.00173946	0.818427	...
2	rs1588187	41634602	G	A	0.00173945	0.820167	...
2	rs7582352	41635221	G	C	0.00173853	0.821905	...
2	rs12053069	41616164	A	G	0.0017335	0.823639	...
2	rs12613191	41635048	A	G	0.00172965	0.825368	...
2	rs4952486	41748171	G	A	0.00172345	0.827092	...
2	rs10865169	41620001	C	T	0.00171791	0.82881	...
2	rs2135997	41619636	C	T	0.00171778	0.830527	...
2	rs7608596	41635265	A	G	0.00171413	0.832242	...
2	rs9808528	41639065	C	A	0.00170954	0.833951	...
2	rs4952460	41633072	G	A	0.00170915	0.83566	...
2	rs2374240	41633486	C	T	0.00170661	0.837367	...
2	rs7609331	41633921	T	C	0.0017034	0.83907	...
2	rs4952359	41617761	A	G	0.00169695	0.840767	...
2	rs4952363	41636820	G	A	0.00166757	0.842435	...
2	rs2195497	41785274	A	C	0.00166626	0.844101	...
2	rs12712760	41631206	C	A	0.00166432	0.845765	...
2	rs2888779	41633255	C	T	0.00166114	0.847427	...
2	rs4245775	41755591	C	T	0.00165058	0.849077	...
2	rs7605315	41632740	T	G	0.00165026	0.850727	...
2	rs13006457	41635482	G	C	0.00164742	0.852375	...
2	rs12623082	41635044	T	C	0.00163355	0.854008	...
2	rs4952471	41714466	C	T	0.00162954	0.855638	...
2	rs4563279	41752612	A	G	0.00162841	0.857266	...
2	rs6750931	41682278	A	G	0.00161972	0.858886	...
2	rs4985337	41700098	T	G	0.00160733	0.860493	...
2	rs6544416	41635938	G	A	0.00160333	0.862097	...
2	rs10208387	41656410	A	G	0.00160075	0.863697	...
2	rs6718572	41681305	C	T	0.00159812	0.865296	...
2	rs4015383	41680152	A	T	0.00158966	0.866885	...
2	rs6544443	41751190	G	A	0.00158872	0.868474	...
2	rs12468176	41655064	C	G	0.00158457	0.870058	...
2	rs4952362	41636730	G	C	0.00151163	0.87157	...
2	rs1605561	41624081	A	G	0.00149538	0.873066	...
2	rs9808530	41639042	G	C	0.00148558	0.874551	...
2	rs1508125	41658700	T	C	0.00146545	0.876017	...
2	rs6736392	41636177	C	T	0.00144657	0.877463	...
2	rs11894022	41785685	A	G	0.00144304	0.878906	...
2	rs11893342	41681756	G	A	0.0014411	0.880347	...
2	rs6544444	41751197	A	G	0.0014367	0.881784	...
2	rs4952360	41630321	C	T	0.00143581	0.88322	...
2	rs10191557	41658224	G	C	0.00142441	0.884644	...
2	rs2136000	41689191	G	A	0.00141177	0.886056	...
2	rs2048181	41647045	T	G	0.0014107	0.887467	...
2	rs7599534	41622247	A	C	0.00140925	0.888876	...
2	rs7586603	41752842	T	G	0.00140354	0.890279	...
2	rs4952453	41569885	C	T	0.00140232	0.891682	...
2	rs4952466	41660028	A	C	0.00139424	0.893076	...
2	rs13029770	41626444	G	C	0.0013893	0.894465	...
2	rs12467113	41645018	T	G	0.00136462	0.89583	...
2	rs13390033	41659975	A	G	0.00136103	0.897191	...
2	rs12712756	41617674	T	G	0.00135075	0.898542	...
2	rs6544437	41736321	A	G	0.00133525	0.899877	...
2	rs4597576	41760362	C	T	0.00133342	0.90121	...
2	rs10207398	41638351	G	A	0.00131609	0.902526	...
2	rs10193833	41625131	T	C	0.00131559	0.903842	...
2	rs1354979	41618677	G	A	0.00131537	0.905157	...
2	rs13005736	41635414	A	C	0.0013088	0.906466	...
2	rs1396135	41626916	T	C	0.00130418	0.90777	...
2	rs906550	41654354	C	A	0.00130324	0.909074	...
2	rs4245772	41633212	G	A	0.00129513	0.910369	...
2	rs7609001	41635639	A	G	0.00129497	0.911664	...
2	rs12373852	41657106	A	G	0.00127811	0.912942	...
2	rs1396138	41632375	C	T	0.00127478	0.914217	...
2	rs10204604	41638052	C	T	0.00126715	0.915484	...
2	rs12712784	41805820	T	G	0.00126511	0.916749	...
2	rs13032213	41621846	A	T	0.00126322	0.918012	...
2	rs1508114	41572171	C	T	0.00125481	0.919267	...
2	rs906547	41627515	C	T	0.00122213	0.920489	...
2	rs13025245	41650675	G	T	0.00120714	0.921696	...
2	rs7578278	41750080	T	C	0.00119539	0.922892	...
2	rs6544419	41650313	T	C	0.00119254	0.924084	...
2	rs13020420	41628539	T	C	0.00119251	0.925277	...
2	rs1354980	41618914	C	T	0.001164	0.926441	...
2	rs1158475	41662343	G	A	0.00114689	0.927588	...
2	rs868215	41628100	G	A	0.00114331	0.928731	...
2	rs12622990	41634751	T	A	0.00111934	0.92985	...
2	rs7572983	41622150	C	T	0.00111928	0.930969	...
2	rs6741457	41693901	T	A	0.00111512	0.932085	...
2	rs9798261	41622920	C	T	0.00111146	0.933196	...
2	rs4952465	41657443	T	A	0.0011107	0.934307	...
2	rs6544425	41692306	C	A	0.00110829	0.935415	...
2	rs1396134	41618171	G	C	0.00110626	0.936521	...
2	rs12712758	41623798	G	A	0.00109978	0.937621	...
2	rs6714836	41650554	C	A	0.00109546	0.938717	...
2	rs1508124	41656025	C	T	0.00108767	0.939804	...
2	rs1354981	41619005	C	A	0.00105641	0.940861	...
2	rs2048178	41561475	T	A	0.0010269	0.941888	...
2	rs2067513	41616153	A	G	0.00102497	0.942912	...
2	rs6544415	41633767	A	G	0.00102352	0.943936	...
2	rs10185379	41751994	C	A	0.00101177	0.944948	...
2	rs13419293	41630982	C	T	0.00100798	0.945956	...
2	rs906552	41654381	A	G	0.0010054	0.946961	...
2	rs2195496	41791788	T	G	0.000999653	0.947961	...
2	rs7565096	41562110	A	C	0.000997214	0.948958	...
2	rs4270392	41752458	T	C	0.0009967	0.949955	...
2	rs6708495	41606889	A	T	0.000988702	0.950943	...
2	rs7580766	42939351	A	G	0.0174943	0.0174943	...
2	rs7607718	42939494	G	T	0.0151909	0.0326852	...
2	rs6720343	42924330	C	A	0.0133061	0.0459913	MTA3
2	rs4953575	42935557	G	A	0.0121327	0.058124	MTA3
2	rs6544590	42944541	G	A	0.0114977	0.0696217	...
2	rs7567593	42931012	A	G	0.0113727	0.0809945	MTA3
2	rs6704953	42945279	C	G	0.0106583	0.0916527	...
2	rs4953573	42934338	C	A	0.0105527	0.102205	MTA3
2	rs3816186	42936547	A	C	0.0103858	0.112591	...
2	rs10182499	42942543	C	T	0.00976107	0.122352	...
2	rs1371406	42925885	G	T	0.00949602	0.131848	MTA3
2	rs4953577	42935961	C	T	0.00869931	0.140548	MTA3
2	rs2043912	42935481	C	T	0.00865932	0.149207	MTA3
2	rs2374440	42930965	T	C	0.00860291	0.15781	MTA3
2	rs4467324	42944108	T	C	0.00851759	0.166328	...
2	rs4953568	42917893	T	C	0.00850465	0.174832	MTA3
2	rs2028340	42930813	G	A	0.00834541	0.183178	MTA3
2	rs1439645	42946885	T	C	0.0083418	0.191519	...
2	rs731204	42922073	G	A	0.0083201	0.199839	MTA3
2	rs6716848	42836018	A	G	0.00807855	0.207918	MTA3
2	rs6733945	42922395	G	A	0.00805636	0.215974	MTA3
2	rs4953580	42938181	C	T	0.00794306	0.223917	...
2	rs1439646	42946689	T	C	0.00785481	0.231772	...
2	rs6544571	42829885	G	A	0.00777722	0.239549	MTA3
2	rs10194712	42942177	T	C	0.00774502	0.247294	...
2	rs6544573	42830109	T	C	0.00765615	0.254951	MTA3
2	rs4444592	42899759	C	T	0.00759047	0.262541	MTA3
2	rs4953529	42870440	C	T	0.00743215	0.269973	MTA3
2	rs4953488	42821022	C	G	0.00733276	0.277306	MTA3
2	rs6724638	42895487	C	T	0.00730497	0.284611	MTA3
2	rs731205	42921899	T	G	0.00730291	0.291914	MTA3
2	rs6744635	42930324	G	A	0.00703966	0.298954	MTA3
2	rs12472339	42925459	G	A	0.00686342	0.305817	MTA3
2	rs752009	42803431	C	T	0.00683123	0.312648	MTA3
2	rs6544574	42830165	A	G	0.00674983	0.319398	MTA3
2	rs1439648	42946565	T	C	0.00674051	0.326139	...
2	rs13393664	42945664	G	A	0.00672961	0.332868	...
2	rs6544584	42882804	G	A	0.00671076	0.339579	MTA3
2	rs10182264	42942105	G	A	0.00666246	0.346241	...
2	rs6544575	42835440	C	T	0.00639278	0.352634	MTA3
2	rs2132534	42803365	T	C	0.006253	0.358887	MTA3
2	rs4953528	42870156	C	T	0.00620265	0.36509	MTA3
2	rs7586943	42893139	C	T	0.00614443	0.371234	MTA3
2	rs7597994	42837018	C	T	0.00612856	0.377363	MTA3
2	rs1561507	42938386	T	C	0.00606899	0.383432	...
2	rs13027020	42865441	G	A	0.00605381	0.389486	MTA3
2	rs6544588	42919911	G	A	0.00604705	0.395533	MTA3
2	rs4953578	42935979	C	T	0.00601641	0.401549	MTA3
2	rs10211285	42861167	C	A	0.00581587	0.407365	MTA3
2	rs6544582	42873653	G	C	0.00579191	0.413157	MTA3
2	rs7558422	42883025	A	G	0.00576892	0.418926	MTA3
2	rs12998822	42799405	T	C	0.00571612	0.424642	MTA3
2	rs6544572	42830088	T	C	0.00569996	0.430342	MTA3
2	rs11678863	42875069	C	T	0.00568714	0.436029	MTA3
2	rs1808001	42834946	C	T	0.00559404	0.441623	MTA3
2	rs12712856	42868673	C	A	0.00559105	0.447214	MTA3
2	rs10180810	42841867	G	C	0.00554941	0.452763	MTA3
2	rs4953583	42940859	G	T	0.00553402	0.458298	...
2	rs11679371	42910919	G	A	0.00553261	0.46383	MTA3
2	rs2374436	42858924	A	G	0.00547871	0.469309	MTA3
2	rs4953576	42935656	A	G	0.00545482	0.474764	MTA3
2	rs2272447	42870975	C	T	0.0053899	0.480154	MTA3
2	rs7590047	42834423	G	C	0.0053526	0.485506	MTA3
2	rs893734	42921654	C	T	0.00534148	0.490848	MTA3
2	rs6739714	42904567	C	T	0.00531133	0.496159	MTA3
2	rs4355164	42858862	C	G	0.00527864	0.501438	MTA3
2	rs6758365	42826407	A	T	0.00524366	0.506681	MTA3
2	rs2028341	42930412	C	T	0.00520409	0.511885	MTA3
2	rs6749160	42892590	T	C	0.00515995	0.517045	MTA3
2	rs6706285	42836213	T	C	0.00515388	0.522199	MTA3
2	rs6708408	42898915	A	G	0.00512304	0.527322	MTA3
2	rs11901849	42859537	G	A	0.00508637	0.532409	MTA3
2	rs4953530	42873371	C	T	0.00508091	0.53749	MTA3
2	rs11679377	42910940	G	C	0.00507976	0.542569	MTA3
2	rs6758688	42856780	A	G	0.00504882	0.547618	MTA3
2	rs10187433	42806738	A	G	0.00504006	0.552658	MTA3
2	rs1534758	42838801	T	C	0.00503762	0.557696	MTA3
2	rs6742450	42859860	G	A	0.00499086	0.562687	MTA3
2	rs6732008	42815066	A	G	0.00492413	0.567611	MTA3
2	rs6544583	42876876	T	A	0.00491057	0.572521	MTA3
2	rs7578653	42896205	G	C	0.00490523	0.577427	MTA3
2	rs1534760	42838398	T	C	0.0048949	0.582321	MTA3
2	rs13017863	42823845	A	T	0.00488868	0.58721	MTA3
2	rs6544565	42805676	G	C	0.00487429	0.592084	MTA3
2	rs12712855	42861598	G	A	0.00486549	0.59695	MTA3
2	rs13036232	42852430	T	C	0.00483419	0.601784	MTA3
2	rs4953562	42912035	T	C	0.004809	0.606593	MTA3
2	rs4952908	42912265	G	C	0.00478632	0.611379	MTA3
2	rs2374437	42864970	G	A	0.00475627	0.616136	MTA3
2	rs10195899	42881534	C	T	0.00473399	0.62087	MTA3
2	rs6544579	42856701	T	C	0.00471336	0.625583	MTA3
2	rs10203855	42890087	T	C	0.00471314	0.630296	MTA3
2	rs4953500	42839153	A	T	0.0047007	0.634997	MTA3
2	rs9973454	42885611	G	A	0.00469278	0.63969	MTA3
2	rs12712854	42861393	G	C	0.00464838	0.644338	MTA3
2	rs7603493	42929177	T	C	0.00464649	0.648985	MTA3
2	rs7572190	42889233	G	A	0.00455009	0.653535	MTA3
2	rs11900308	42893307	C	T	0.00454158	0.658076	MTA3
2	rs10167004	42807617	C	T	0.00451704	0.662593	MTA3
2	rs10180317	42841456	G	C	0.00450604	0.667099	MTA3
2	rs10172447	42881725	A	G	0.00444344	0.671543	MTA3
2	rs6730799	42844099	A	G	0.0044161	0.675959	MTA3
2	rs7589931	42834310	G	A	0.00440603	0.680365	MTA3
2	rs10199169	42843233	T	C	0.00439744	0.684762	MTA3
2	rs7594977	42860598	G	A	0.00438523	0.689148	MTA3
2	rs10188263	42824310	C	G	0.0043809	0.693528	MTA3
2	rs6544568	42811406	C	T	0.0043612	0.69789	MTA3
2	rs2374435	42858756	A	C	0.00427199	0.702162	MTA3
2	rs10865183	42882210	A	G	0.00422399	0.706386	MTA3
2	rs2141548	42819994	T	C	0.00417375	0.710559	MTA3
2	rs4952909	42912381	T	C	0.00413627	0.714696	MTA3
2	rs2304658	42931217	A	C	0.00406826	0.718764	MTA3
2	rs2374438	42909010	A	G	0.0040476	0.722812	MTA3
2	rs12994751	42825870	A	G	0.00404033	0.726852	MTA3
2	rs6544576	42851228	A	G	0.00400516	0.730857	MTA3
2	rs6736719	42810710	A	G	0.0039906	0.734848	MTA3
2	rs6544567	42807978	C	T	0.00395494	0.738803	MTA3
2	rs6720277	42836516	A	G	0.00392468	0.742727	MTA3
2	rs2103338	42850585	C	T	0.00392401	0.746651	MTA3
2	rs2103339	42850940	C	A	0.00390979	0.750561	MTA3
2	rs4953502	42842651	G	A	0.00389973	0.754461	MTA3
2	rs12473172	42841987	T	C	0.00386737	0.758328	MTA3
2	rs13023683	42908951	T	C	0.00385005	0.762178	MTA3
2	rs4953499	42838832	T	C	0.0038026	0.765981	MTA3
2	rs12996750	42880771	G	A	0.00375261	0.769733	MTA3
2	rs4952910	42912517	C	T	0.0037362	0.77347	MTA3
2	rs2037884	42878172	T	C	0.0036927	0.777162	MTA3
2	rs2374423	42820422	A	G	0.00364534	0.780808	MTA3
2	rs6717652	42814193	T	C	0.00363056	0.784438	MTA3
2	rs7570996	42843845	C	A	0.00361883	0.788057	MTA3
2	rs6544578	42856324	A	C	0.0036011	0.791658	MTA3
2	rs11690432	42910983	A	T	0.0035543	0.795212	MTA3
2	rs13000904	42863642	G	A	0.00355008	0.798762	MTA3
2	rs6544577	42854765	G	A	0.00354177	0.802304	MTA3
2	rs10208367	42881492	T	C	0.0035313	0.805836	MTA3
2	rs4953569	42918300	T	C	0.00348488	0.80932	MTA3
2	rs13036059	42852365	T	A	0.00348121	0.812802	MTA3
2	rs13001612	42826647	G	A	0.00341319	0.816215	MTA3
2	rs2374421	42818717	T	C	0.00335761	0.819572	MTA3
2	rs7571176	42843817	G	C	0.00330644	0.822879	MTA3
2	rs6716721	42835932	A	G	0.00329818	0.826177	MTA3
2	rs6544570	42819276	C	T	0.00318772	0.829365	MTA3
2	rs12474864	42827290	G	A	0.00316641	0.832531	MTA3
2	rs2047309	42811119	G	A	0.00313046	0.835662	MTA3
2	rs2374422	42820416	T	C	0.00308895	0.838751	MTA3
2	rs4953564	42912493	A	G	0.00306548	0.841816	MTA3
2	rs2083348	42921273	C	G	0.00297943	0.844796	MTA3
2	rs2141549	42820101	A	G	0.00293441	0.84773	MTA3
2	rs3937908	42761804	C	G	0.00278031	0.85051	...
2	rs2374442	43002930	G	A	0.00276951	0.85328	HAAO
2	rs6715736	42809030	T	C	0.00276061	0.85604	MTA3
2	rs6720652	42813885	C	T	0.00273549	0.858776	MTA3
2	rs7578494	42896255	C	G	0.00273207	0.861508	MTA3
2	rs7573457	42849607	C	T	0.00266898	0.864177	MTA3
2	rs4953489	42821082	T	C	0.00260911	0.866786	MTA3
2	rs7583828	42827705	C	T	0.00260369	0.86939	MTA3
2	rs7563640	42811663	G	A	0.00255625	0.871946	MTA3
2	rs4297935	42818377	T	G	0.00253708	0.874483	MTA3
2	rs4411758	42925165	G	A	0.00252951	0.877013	MTA3
2	rs10190727	42710569	T	C	0.00243039	0.879443	KCNG3
2	rs10183074	42817938	C	T	0.00235306	0.881796	MTA3
2	rs2141550	42820106	T	C	0.00234465	0.884141	MTA3
2	rs7562984	42841300	C	T	0.00212886	0.88627	MTA3
2	rs11692987	42790564	T	A	0.00209097	0.888361	...
2	rs7574668	42837491	A	G	0.00203319	0.890394	MTA3
2	rs4953531	42874088	C	A	0.00201535	0.892409	MTA3
2	rs3796075	42722410	T	A	0.00199303	0.894402	...
2	rs7607881	42784539	C	T	0.0019748	0.896377	...
2	rs10193864	42808533	A	G	0.00196853	0.898345	MTA3
2	rs11124885	42813197	A	G	0.00183169	0.900177	MTA3
2	rs62144828	42761930	T	C	0.00178644	0.901964	...
2	rs62142750	42900018	C	G	0.00175489	0.903718	MTA3
2	rs6544597	43013593	T	G	0.00173369	0.905452	HAAO
2	rs4953436	42784398	A	G	0.00172911	0.907181	...
2	rs7584524	42778326	T	G	0.00168556	0.908867	...
2	rs2119015	43002055	A	G	0.00162326	0.91049	HAAO
2	rs2374420	42804619	T	A	0.0016149	0.912105	MTA3
2	rs893731	43015432	T	C	0.00160971	0.913715	HAAO
2	rs6737859	43011442	A	C	0.00154528	0.91526	HAAO
2	rs1811657	42761557	A	G	0.00148977	0.91675	...
2	rs6717616	43013337	G	T	0.00148872	0.918238	HAAO
2	rs10172104	43000899	T	C	0.00148403	0.919722	HAAO
2	rs11124892	43014304	C	A	0.00147589	0.921198	HAAO
2	rs7556905	42827341	A	C	0.00146856	0.922667	MTA3
2	rs6716590	42812701	G	A	0.00145874	0.924126	MTA3
2	rs13033417	42866263	C	T	0.00143339	0.925559	MTA3
2	rs4952815	42719321	T	C	0.00139059	0.92695	KCNG3
2	rs2047308	42811157	A	G	0.00131112	0.928261	MTA3
2	rs3796078	42721773	T	C	0.00127445	0.929535	...
2	rs3796074	42722599	G	A	0.00127054	0.930806	...
2	rs3816184	43015757	G	A	0.00120601	0.932012	HAAO
2	rs7578547	42947335	T	C	0.00120291	0.933215	...
2	rs3816179	43015401	T	C	0.00120114	0.934416	HAAO
2	rs893730	43015366	T	A	0.00117071	0.935587	HAAO
2	rs3816185	43015902	G	A	0.00112558	0.936712	HAAO
2	rs4287811	42780380	G	A	0.00109245	0.937805	...
2	rs3796077	42722048	A	G	0.0010653	0.93887	...
2	rs3772062	43017045	T	C	0.00103904	0.939909	HAAO
2	rs893729	43015224	A	G	0.000985305	0.940894	HAAO
2	rs7422835	43016007	A	G	0.000875358	0.94177	HAAO
2	rs11124894	43032241	C	T	0.000873184	0.942643	...
2	rs893727	43056139	T	G	0.000818193	0.943461	...
2	rs10193013	43017416	T	C	0.000796579	0.944258	HAAO
2	rs10180962	43017747	G	C	0.000749283	0.945007	HAAO
2	rs2304657	43019927	T	C	0.000748867	0.945756	...
2	rs12998043	43018054	T	C	0.000747917	0.946504	HAAO
2	rs920391	43019347	G	C	0.000740213	0.947244	HAAO
2	rs6752377	42779382	A	C	0.000730484	0.947974	...
2	rs56661035	42731313	A	G	0.000711973	0.948686	...
2	rs920392	43019364	G	C	0.000707733	0.949394	HAAO
2	rs3772061	43016941	A	G	0.000698919	0.950093	HAAO
2	rs6710871	143960593	A	G	0.278272	0.278272	ARHGAP15
2	rs1376750	143967920	T	C	0.0103511	0.288623	ARHGAP15
2	rs1376749	143967392	A	G	0.00896273	0.297586	ARHGAP15
2	rs7598904	143961344	C	G	0.00867302	0.306259	ARHGAP15
2	rs6713381	143966485	A	C	0.00825812	0.314517	ARHGAP15
2	rs7598630	143961287	T	C	0.00822438	0.322741	ARHGAP15
2	rs6750140	143961104	A	G	0.00818827	0.33093	ARHGAP15
2	rs6711472	143961019	C	G	0.00802454	0.338954	ARHGAP15
2	rs6755501	143957144	A	G	0.00793274	0.346887	ARHGAP15
2	rs6728893	143966611	G	T	0.00784671	0.354734	ARHGAP15
2	rs6430012	143976382	C	T	0.00782342	0.362557	ARHGAP15
2	rs6758942	143954658	G	T	0.00765166	0.370209	ARHGAP15
2	rs6711340	143960933	A	G	0.00762178	0.37783	ARHGAP15
2	rs6711023	143960839	T	C	0.00759111	0.385422	ARHGAP15
2	rs13032320	143955490	A	G	0.00753556	0.392957	ARHGAP15
2	rs7607591	143958589	G	C	0.00726523	0.400222	ARHGAP15
2	rs6726717	143957235	T	A	0.00715163	0.407374	ARHGAP15
2	rs12994078	143962373	T	C	0.00711596	0.41449	ARHGAP15
2	rs6729942	143970667	A	C	0.00708134	0.421571	ARHGAP15
2	rs10496944	143982370	A	G	0.00696281	0.428534	ARHGAP15
2	rs2304728	143973565	A	G	0.00692225	0.435456	ARHGAP15
2	rs13025980	143945796	G	T	0.00686789	0.442324	ARHGAP15
2	rs6430013	143981267	C	G	0.00665274	0.448977	ARHGAP15
2	rs16858895	143978362	A	G	0.00661499	0.455592	ARHGAP15
2	rs57720556	143982501	A	C	0.00659764	0.46219	ARHGAP15
2	rs6749243	143943789	C	A	0.00657127	0.468761	ARHGAP15
2	rs6716653	143949956	G	A	0.00653832	0.475299	ARHGAP15
2	rs34583638	143960018	C	T	0.00650096	0.4818	ARHGAP15
2	rs16858818	143958213	A	T	0.00646079	0.488261	ARHGAP15
2	rs16858815	143957389	C	T	0.00644664	0.494708	ARHGAP15
2	rs1869011	143964540	G	T	0.00627478	0.500982	ARHGAP15
2	rs7607443	143951268	C	A	0.00626811	0.50725	ARHGAP15
2	rs16858835	143962409	T	A	0.00625996	0.51351	ARHGAP15
2	rs34720301	143962134	A	G	0.00625925	0.51977	ARHGAP15
2	rs6711010	143960812	T	C	0.00624128	0.526011	ARHGAP15
2	rs34228828	143960080	G	A	0.0062317	0.532243	ARHGAP15
2	rs34183792	143959892	T	C	0.00623045	0.538473	ARHGAP15
2	rs62171700	143959863	T	C	0.00623013	0.544703	ARHGAP15
2	rs62171701	143960031	A	G	0.00622927	0.550932	ARHGAP15
2	rs62171699	143959151	T	C	0.00621397	0.557146	ARHGAP15
2	rs62171696	143952266	A	T	0.00621367	0.56336	ARHGAP15
2	rs62171698	143959096	A	C	0.00620991	0.56957	ARHGAP15
2	rs7568927	143958855	C	T	0.00620767	0.575778	ARHGAP15
2	rs7581335	143958864	T	A	0.00620617	0.581984	ARHGAP15
2	rs6749607	143944078	G	A	0.00618773	0.588172	ARHGAP15
2	rs6751487	143956267	T	G	0.00616614	0.594338	ARHGAP15
2	rs6744232	143954986	T	G	0.00616595	0.600504	ARHGAP15
2	rs6743877	143954690	T	G	0.00614952	0.606653	ARHGAP15
2	rs13012536	143952935	A	G	0.00614608	0.612799	ARHGAP15
2	rs6430011	143973348	G	A	0.00614552	0.618945	ARHGAP15
2	rs10496943	143953158	A	G	0.00610914	0.625054	ARHGAP15
2	rs16858876	143971679	A	G	0.00610282	0.631157	ARHGAP15
2	rs6727972	143971849	G	T	0.00610186	0.637259	ARHGAP15
2	rs7592165	143975173	C	T	0.00609693	0.643356	ARHGAP15
2	rs7592156	143975144	C	T	0.00609644	0.649452	ARHGAP15
2	rs6430007	143971326	T	C	0.00605815	0.65551	ARHGAP15
2	rs6430008	143971339	T	C	0.00605785	0.661568	ARHGAP15
2	rs7593373	143979391	T	C	0.00595656	0.667525	ARHGAP15
2	rs6430006	143970901	A	G	0.00585859	0.673383	ARHGAP15
2	rs35028264	143972880	T	G	0.00570573	0.679089	ARHGAP15
2	rs1869013	143964623	C	A	0.00565139	0.68474	ARHGAP15
2	rs6430010	143972554	A	T	0.00563168	0.690372	ARHGAP15
2	rs10496942	143943446	A	G	0.00507932	0.695451	ARHGAP15
2	rs16858757	143944868	T	A	0.00505177	0.700503	ARHGAP15
2	rs1869010	143964536	G	A	0.00504425	0.705547	ARHGAP15
2	rs16858822	143958373	A	G	0.00496403	0.710511	ARHGAP15
2	rs62171677	143948720	G	A	0.00495933	0.715471	ARHGAP15
2	rs35713119	143948355	C	A	0.00486554	0.720336	ARHGAP15
2	rs16858762	143948823	A	T	0.00485937	0.725196	ARHGAP15
2	rs4603705	143996338	A	G	0.00485863	0.730054	ARHGAP15
2	rs16858765	143948954	T	A	0.00485809	0.734912	ARHGAP15
2	rs7566034	144012252	T	C	0.00484138	0.739754	ARHGAP15
2	rs6708433	144005509	T	G	0.0047187	0.744472	ARHGAP15
2	rs16858902	143983664	C	T	0.00463988	0.749112	ARHGAP15
2	rs16858788	143952636	T	A	0.00463092	0.753743	ARHGAP15
2	rs16858786	143952408	T	C	0.00462011	0.758363	ARHGAP15
2	rs7599572	143983038	C	T	0.00454095	0.762904	ARHGAP15
2	rs7581236	143988843	G	A	0.00449274	0.767397	ARHGAP15
2	rs16858878	143972823	A	G	0.00425285	0.77165	ARHGAP15
2	rs35850684	143994472	C	G	0.00404322	0.775693	ARHGAP15
2	rs6750819	143996717	A	C	0.00393077	0.779624	ARHGAP15
2	rs36103269	143958341	C	T	0.00390558	0.783529	ARHGAP15
2	rs6710157	143993872	G	A	0.00387351	0.787403	ARHGAP15
2	rs62171740	143994113	A	G	0.00387234	0.791275	ARHGAP15
2	rs34280020	143994426	T	G	0.00386902	0.795144	ARHGAP15
2	rs34720865	143995933	C	T	0.00385156	0.798996	ARHGAP15
2	rs62171745	143998792	T	G	0.00383461	0.80283	ARHGAP15
2	rs34280666	143997644	C	T	0.00376418	0.806595	ARHGAP15
2	rs13033072	144004556	C	T	0.00374631	0.810341	ARHGAP15
2	rs36090501	144004760	C	T	0.00374213	0.814083	ARHGAP15
2	rs13007991	143999213	G	A	0.00372794	0.817811	ARHGAP15
2	rs10496941	143943158	C	T	0.00370977	0.821521	ARHGAP15
2	rs62171743	143995266	A	G	0.00368952	0.82521	ARHGAP15
2	rs6430014	143992938	G	C	0.00367362	0.828884	ARHGAP15
2	rs35048078	144006509	A	G	0.00363149	0.832515	ARHGAP15
2	rs34649233	144006519	C	T	0.00363146	0.836147	ARHGAP15
2	rs60632578	144006716	T	G	0.00362723	0.839774	ARHGAP15
2	rs7567001	144007135	T	C	0.00362333	0.843397	ARHGAP15
2	rs7567275	144007227	A	G	0.00362101	0.847018	ARHGAP15
2	rs34360547	143958348	A	G	0.00360734	0.850626	ARHGAP15
2	rs62171673	143945257	A	G	0.00354967	0.854175	ARHGAP15
2	rs62171742	143995246	C	T	0.0035454	0.857721	ARHGAP15
2	rs34889151	143999998	G	A	0.0035374	0.861258	ARHGAP15
2	rs6717176	144007891	C	G	0.0035157	0.864774	ARHGAP15
2	rs7566131	144012194	A	G	0.00349289	0.868267	ARHGAP15
2	rs6736543	144005219	G	A	0.00348353	0.87175	ARHGAP15
2	rs35373393	143999948	C	G	0.00345577	0.875206	ARHGAP15
2	rs7562611	144011591	T	C	0.00341927	0.878625	ARHGAP15
2	rs13024411	144012024	G	A	0.00339477	0.88202	ARHGAP15
2	rs7563907	144006742	T	C	0.00339018	0.88541	ARHGAP15
2	rs13024395	144011995	G	A	0.00323359	0.888644	ARHGAP15
2	rs34176662	144009790	A	G	0.00317095	0.891815	ARHGAP15
2	rs12987047	143961414	G	A	0.00315192	0.894967	ARHGAP15
2	rs7607384	143988492	T	C	0.00307418	0.898041	ARHGAP15
2	rs78509034	143945985	T	A	0.00297078	0.901012	ARHGAP15
2	rs4589691	144051398	G	C	0.00293764	0.903949	ARHGAP15
2	rs13012336	144001613	C	T	0.00279904	0.906748	ARHGAP15
2	rs13026285	143945986	C	T	0.00271419	0.909463	ARHGAP15
2	rs6430005	143970898	A	C	0.00264757	0.91211	ARHGAP15
2	rs4427953	143996606	A	G	0.00262867	0.914739	ARHGAP15
2	rs6430017	144007986	C	T	0.00262683	0.917366	ARHGAP15
2	rs17205833	143952304	C	T	0.00258333	0.919949	ARHGAP15
2	rs17812661	143981529	A	G	0.00254464	0.922494	ARHGAP15
2	rs13027764	143979926	G	C	0.00253955	0.925033	ARHGAP15
2	rs17207319	143981836	G	C	0.00252665	0.92756	ARHGAP15
2	rs35904384	143981909	G	A	0.00252626	0.930086	ARHGAP15
2	rs17812769	143982051	C	T	0.00252542	0.932612	ARHGAP15
2	rs12988287	143961934	T	C	0.00249238	0.935104	ARHGAP15
2	rs13004383	143981603	A	G	0.00244431	0.937548	ARHGAP15
2	rs35165674	143977200	G	T	0.00240154	0.93995	ARHGAP15
2	rs17206835	143971643	G	A	0.00235198	0.942302	ARHGAP15
2	rs10496945	143998944	A	G	0.00234323	0.944645	ARHGAP15
2	rs17227678	144017894	T	C	0.00233592	0.946981	ARHGAP15
2	rs35589335	144000134	G	A	0.00232663	0.949307	ARHGAP15
2	rs13032052	143976480	C	T	0.00225749	0.951565	ARHGAP15
3	rs4857968	20714580	A	G	0.110778	0.110778	...
3	rs62237509	20724955	A	T	0.0675685	0.178346	...
3	rs62234988	20736873	C	T	0.051913	0.230259	...
3	rs2366311	20740333	G	C	0.049391	0.27965	...
3	rs62237500	20718719	A	C	0.0461838	0.325834	...
3	rs62234991	20744496	A	G	0.0458692	0.371703	...
3	rs56286961	20727350	G	A	0.04513	0.416833	...
3	rs55964255	20742291	T	C	0.0441778	0.461011	...
3	rs62234961	20727961	A	G	0.0439093	0.50492	...
3	rs4858254	20729909	T	C	0.0437197	0.54864	...
3	rs62237501	20719310	A	G	0.0418145	0.590454	...
3	rs17808771	20691823	T	A	0.0383309	0.628785	...
3	rs17809565	20738089	G	A	0.0341197	0.662905	...
3	rs62237499	20717763	G	T	0.0315385	0.694443	...
3	rs56168640	20712594	T	G	0.0264031	0.720847	...
3	rs17809304	20707357	A	T	0.0257615	0.746608	...
3	rs1566478	20710619	C	T	0.0196391	0.766247	...
3	rs62237497	20713907	T	C	0.0195798	0.785827	...
3	rs62234992	20748320	G	T	0.0179214	0.803748	...
3	rs62237495	20707752	G	C	0.0177835	0.821532	...
3	rs1566479	20710994	C	T	0.0172007	0.838733	...
3	rs62237468	20689091	C	T	0.0126586	0.851391	...
3	rs7644564	20703682	G	A	0.0121312	0.863522	...
3	rs4857964	20690199	A	T	0.0110074	0.87453	...
3	rs17809510	20731513	T	C	0.0102362	0.884766	...
3	rs4019656	20673101	C	A	0.00923444	0.894	...
3	rs2008935	20705659	G	A	0.00868145	0.902682	...
3	rs62242112	20662735	T	C	0.0086646	0.911347	...
3	rs62242111	20662634	C	G	0.00866442	0.920011	...
3	rs62234987	20735965	C	T	0.0076352	0.927646	...
3	rs62234989	20741531	C	A	0.00689208	0.934538	...
3	rs62234986	20733131	C	A	0.0052885	0.939827	...
3	rs7630795	20703509	T	C	0.00478433	0.944611	...
3	rs4858255	20750741	G	A	0.00440805	0.949019	...
3	rs10460980	20406783	T	C	0.0041229	0.953142	...
3	rs775709	77655818	A	C	0.0930114	0.0930114	ROBO2
3	rs775710	77655364	A	C	0.0883034	0.181315	ROBO2
3	rs1666132	77649190	C	T	0.0611857	0.2425	ROBO2
3	rs1666125	77650799	T	C	0.0610369	0.303537	ROBO2
3	rs4539917	77650239	C	T	0.0558901	0.359427	ROBO2
3	rs1721175	77650694	C	T	0.0552539	0.414681	ROBO2
3	rs775712	77654270	G	A	0.0317609	0.446442	ROBO2
3	rs876675	77675638	C	T	0.0227494	0.469192	ROBO2
3	rs775728	77639136	A	G	0.0220689	0.491261	ROBO2
3	rs1666131	77648741	A	G	0.0209948	0.512255	ROBO2
3	rs775736	77636880	A	G	0.019917	0.532172	ROBO2
3	rs775718	77645984	A	G	0.0171805	0.549353	ROBO2
3	rs775724	77642438	A	G	0.0171605	0.566513	ROBO2
3	rs775735	77637025	A	G	0.0171234	0.583637	ROBO2
3	rs775734	77637321	C	T	0.0169081	0.600545	ROBO2
3	chr3:77646862:D	77646862	TG	T	0.0168751	0.61742	ROBO2
3	rs775737	77636752	G	C	0.0168278	0.634248	ROBO2
3	rs775743	77635029	G	T	0.0163088	0.650557	ROBO2
3	rs775721	77643650	G	T	0.0161617	0.666718	ROBO2
3	rs775725	77641929	C	T	0.015893	0.682611	ROBO2
3	rs775719	77645417	C	G	0.0151433	0.697755	ROBO2
3	rs775741	77635154	T	C	0.0150908	0.712845	ROBO2
3	rs775720	77644039	A	G	0.0145521	0.727398	ROBO2
3	rs4324452	77629576	A	C	0.0142642	0.741662	ROBO2
3	rs11127601	77678576	G	A	0.0129882	0.75465	ROBO2
3	rs775723	77643174	G	T	0.0128868	0.767537	ROBO2
3	chr3:77648392:I	77648392	A	AATAG	0.0121588	0.779696	ROBO2
3	rs9309774	77638713	A	C	0.0120987	0.791794	ROBO2
3	rs812328	77630462	T	C	0.0117701	0.803564	ROBO2
3	rs796528	77633886	C	A	0.0117359	0.8153	ROBO2
3	rs56027863	77673550	A	G	0.0116242	0.826924	ROBO2
3	rs34486006	77673774	G	A	0.0115935	0.838518	ROBO2
3	rs2272162	77671904	T	C	0.0115008	0.850019	ROBO2
3	rs775739	77635691	C	T	0.0109117	0.860931	ROBO2
3	rs775740	77635242	G	A	0.010762	0.871693	ROBO2
3	rs775726	77641892	G	A	0.0106592	0.882352	ROBO2
3	rs775731	77624784	C	T	0.0103407	0.892692	ROBO2
3	rs1523766	77670448	A	G	0.0100607	0.902753	ROBO2
3	rs812888	77630267	T	C	0.00989922	0.912652	ROBO2
3	rs13063307	77686783	A	T	0.00929465	0.921947	ROBO2
3	rs1523751	77658497	G	A	0.00901453	0.930962	ROBO2
3	rs775745	77632127	G	C	0.00869822	0.93966	ROBO2
3	chr3:77655370:D	77655370	GA	G	0.00624822	0.945908	ROBO2
3	chr3:77646863:D	77646863	GGA	G	0.00610876	0.952017	ROBO2
3	rs1436351	104617973	G	T	0.38728	0.38728	...
3	rs6780459	104624105	A	T	0.295833	0.683113	...
3	rs11914438	104618616	G	T	0.00770873	0.690822	...
3	rs1436344	104606144	G	C	0.00675493	0.697577	...
3	rs80287502	104644206	C	T	0.00667438	0.704251	...
3	rs1347573	104606356	G	A	0.00656772	0.710819	...
3	rs2399036	104645208	T	G	0.00645746	0.717276	...
3	rs7637880	104610117	C	G	0.00637429	0.723651	...
3	rs1436346	104607948	C	T	0.00597488	0.729626	...
3	rs1436343	104606130	A	G	0.00551747	0.735143	...
3	rs1436348	104612668	A	G	0.00533852	0.740481	...
3	rs12495375	104645008	C	T	0.00514111	0.745623	...
3	rs9850907	104631770	T	A	0.00506343	0.750686	...
3	rs1436347	104612394	C	T	0.00472297	0.755409	...
3	rs73852365	104606818	C	G	0.00466255	0.760072	...
3	rs79129491	104644547	C	T	0.00456506	0.764637	...
3	rs79491030	104644123	T	C	0.00451251	0.769149	...
3	rs4895115	104633596	G	A	0.00448124	0.77363	...
3	rs80133323	104644467	G	A	0.00446868	0.778099	...
3	rs58948644	104611900	G	A	0.00442275	0.782522	...
3	rs74561017	104644431	A	G	0.00435469	0.786876	...
3	rs79590039	104644209	T	C	0.0042492	0.791126	...
3	rs74876629	104644298	T	C	0.00424106	0.795367	...
3	rs12491907	104644878	G	C	0.00419455	0.799561	...
3	rs114964975	104643889	A	G	0.00418313	0.803744	...
3	rs7634730	104609132	C	T	0.0040845	0.807829	...
3	rs76146796	104644007	T	C	0.00400001	0.811829	...
3	rs12491151	104635333	A	T	0.003905	0.815734	...
3	rs78536299	104634168	A	G	0.00382823	0.819562	...
3	rs12493127	104631925	C	T	0.00382672	0.823389	...
3	rs75906843	104628866	C	A	0.0037819	0.827171	...
3	rs77007749	104614156	A	T	0.00373949	0.83091	...
3	rs77535483	104614131	A	T	0.00373944	0.83465	...
3	rs76088437	104627552	A	T	0.0037312	0.838381	...
3	rs9799273	104644576	A	G	0.00370267	0.842084	...
3	rs78748732	104644017	G	A	0.00365437	0.845738	...
3	rs78262357	104614864	G	A	0.00365156	0.849389	...
3	rs78125475	104621126	T	C	0.00365146	0.853041	...
3	rs12488610	104643502	T	A	0.00364104	0.856682	...
3	rs79232721	104615314	A	G	0.00363686	0.860319	...
3	rs4894892	104626471	C	T	0.00357708	0.863896	...
3	rs12493255	104632451	C	T	0.00357205	0.867468	...
3	rs78968322	104625153	T	C	0.0035564	0.871024	...
3	rs74690023	104624435	G	C	0.00350065	0.874525	...
3	rs16850695	104642471	T	G	0.00339893	0.877924	...
3	rs10511231	104642997	C	T	0.00334847	0.881272	...
3	rs16850698	104642519	C	G	0.00331581	0.884588	...
3	rs75471328	104643938	T	C	0.00326518	0.887853	...
3	rs12695098	104609236	G	A	0.00325263	0.891106	...
3	rs78051480	104608384	G	T	0.00316247	0.894269	...
3	rs79959532	104608918	G	T	0.00301787	0.897286	...
3	rs12488688	104643771	C	A	0.00296448	0.900251	...
3	rs76728556	104642664	C	A	0.00281884	0.90307	...
3	rs75450509	104642691	G	T	0.00281873	0.905888	...
3	rs80192611	104642687	T	C	0.00281828	0.908707	...
3	rs76170299	104642337	C	G	0.00281624	0.911523	...
3	rs76441738	104614258	T	G	0.00252371	0.914047	...
3	rs9798992	104644586	T	A	0.00239948	0.916446	...
3	rs75640999	104642398	T	G	0.00224869	0.918695	...
3	rs77417633	104642421	A	C	0.00216092	0.920856	...
3	rs2399033	104645657	A	G	0.00157021	0.922426	...
3	rs2399034	104645654	C	T	0.00153688	0.923963	...
3	rs9798880	104644743	C	T	0.0014809	0.925444	...
3	rs77672776	104644345	T	G	0.00116421	0.926608	...
3	rs77975777	104624949	A	G	0.000967834	0.927576	...
3	rs75899081	104602566	C	T	0.000872815	0.928449	...
3	rs77008191	104650400	G	A	0.000848993	0.929298	...
3	rs17452502	104732616	C	G	0.000789829	0.930087	...
3	rs112983601	104687040	T	G	0.000779014	0.930866	...
3	rs12493776	104698102	C	T	0.000771443	0.931638	...
3	rs76763042	104699045	A	G	0.000766908	0.932405	...
3	rs77667635	104655532	T	C	0.000761079	0.933166	...
3	rs80286909	104655191	T	C	0.000760992	0.933927	...
3	rs77313883	104654637	A	G	0.000760771	0.934688	...
3	rs77430565	104700895	C	T	0.000757881	0.935446	...
3	rs112118494	104680448	A	G	0.000748728	0.936194	...
3	rs112917222	104724089	G	C	0.000744915	0.936939	...
3	rs77725032	104676430	A	G	0.000728606	0.937668	...
3	rs77157184	104598144	A	G	0.000693852	0.938362	...
3	rs75553589	104671130	T	C	0.000664993	0.939027	...
3	rs76486075	104659842	C	A	0.000655312	0.939682	...
3	rs74606164	104729709	T	C	0.000641793	0.940324	...
3	rs111227709	104666752	A	G	0.00063787	0.940962	...
3	rs17384777	104639377	C	T	0.000612616	0.941574	...
3	rs112011737	104657682	G	A	0.000591895	0.942166	...
3	rs80308731	104594148	T	A	0.000583241	0.942749	...
3	rs2399022	104592065	G	C	0.00057431	0.943324	...
3	rs77448781	104591241	A	G	0.000570841	0.943895	...
3	rs79911215	104716166	A	G	0.000561525	0.944456	...
3	rs78305591	104664317	G	A	0.000549001	0.945005	...
3	rs75696030	104591467	T	C	0.00053902	0.945544	...
3	rs113618563	104648387	A	G	0.000509368	0.946053	...
3	rs17452768	104737039	C	T	0.000503982	0.946557	...
3	rs16850638	104594467	T	C	0.00048161	0.947039	...
3	rs10933794	104589485	C	G	0.000376294	0.947415	...
3	rs111422926	104722377	T	A	0.00035022	0.947766	...
3	rs113547264	104747777	G	A	0.00034152	0.948107	...
3	rs2399031	104746619	T	G	0.000340454	0.948448	...
3	rs79042943	104742641	C	T	0.000337367	0.948785	...
3	rs17452281	104721564	G	A	0.000318648	0.949104	...
3	rs76385133	104765393	G	A	0.000299266	0.949403	...
3	rs75567070	104768456	G	A	0.000298643	0.949701	...
3	rs78019051	104585899	T	C	0.00028758	0.949989	...
3	rs17443135	104599000	C	T	0.000286572	0.950276	...
4	rs4833079	38654681	C	T	0.655427	0.655427	FLJ13197
4	rs3209570	38699657	A	G	0.0440569	0.699484	KLF3
4	rs34089598	38677227	C	A	0.0320765	0.73156	KLF3
4	rs36023504	38698924	T	C	0.0286374	0.760197	KLF3
4	rs4832783	38648406	C	G	0.0267828	0.78698	FLJ13197
4	rs1000096	38692835	T	C	0.0193044	0.806285	KLF3
4	rs11727467	38646103	G	A	0.0165552	0.82284	FLJ13197
4	rs34722008	38659594	A	G	0.0123629	0.835203	FLJ13197
4	rs35771878	38634757	G	A	0.0123393	0.847542	FLJ13197
4	rs6813852	38651997	T	C	0.0123074	0.859849	FLJ13197
4	rs6827414	38650464	T	C	0.0118582	0.871708	FLJ13197
4	rs6812216	38651939	A	G	0.0112763	0.882984	FLJ13197
4	rs36071400	38632166	C	T	0.0106533	0.893637	FLJ13197
4	rs6845639	38716721	G	A	0.0104954	0.904133	...
4	rs35547424	38634704	C	T	0.0104395	0.914572	FLJ13197
4	rs13144836	38625501	C	G	0.0102611	0.924833	FLJ13197
4	rs13149231	38716483	T	C	0.00983402	0.934667	...
4	rs34494851	38613107	G	C	0.00960183	0.944269	...
4	rs13102095	38626522	T	C	0.00952739	0.953796	FLJ13197
4	rs10019997	137048599	T	C	0.157086	0.157086	...
4	rs1296328	137083193	A	C	0.0380171	0.195103	...
4	rs2405708	136981722	T	C	0.0337086	0.228812	...
4	rs4863947	136978022	C	A	0.0248524	0.253664	...
4	rs10519370	136974456	T	C	0.0229074	0.276572	...
4	rs6856243	137006447	T	C	0.0215576	0.298129	...
4	rs4571392	136985088	T	A	0.0213043	0.319434	...
4	rs10519371	136974805	T	G	0.021268	0.340702	...
4	rs4290943	136985094	C	T	0.0210893	0.361791	...
4	rs1917966	136979452	A	C	0.0207987	0.38259	...
4	rs11932277	136990154	T	C	0.0203656	0.402955	...
4	rs4241964	137053959	G	T	0.0199321	0.422887	...
4	rs1917952	136997635	T	C	0.019471	0.442358	...
4	rs7668617	136993559	T	G	0.0193186	0.461677	...
4	rs1917969	136983505	T	C	0.0191822	0.480859	...
4	rs4512055	136998965	A	G	0.0185799	0.499439	...
4	rs13139744	137005181	C	T	0.0176022	0.517041	...
4	rs9684381	136986189	T	A	0.017414	0.534455	...
4	rs6852538	136980973	C	T	0.0168122	0.551267	...
4	rs2222654	137006061	C	T	0.0162607	0.567528	...
4	rs1917961	137010155	A	T	0.0159683	0.583496	...
4	rs12513032	137058028	T	C	0.0159461	0.599442	...
4	rs2897208	137011492	G	A	0.015372	0.614814	...
4	rs11941908	136969266	G	T	0.0148779	0.629692	...
4	rs17594898	137009750	G	C	0.0148577	0.64455	...
4	rs1917959	137010533	T	C	0.0147944	0.659344	...
4	rs2204513	137005969	C	T	0.0144069	0.673751	...
4	rs10017078	137017760	G	C	0.0131487	0.6869	...
4	rs2222655	137050457	A	T	0.0130867	0.699987	...
4	rs1917954	137053651	C	T	0.013058	0.713045	...
4	rs12502928	137038039	A	G	0.0128019	0.725846	...
4	rs1917965	137003314	T	C	0.0127091	0.738555	...
4	rs1949899	137036641	C	G	0.0123673	0.750923	...
4	rs12386410	137018898	G	A	0.0120791	0.763002	...
4	rs1283044	137060583	C	T	0.011893	0.774895	...
4	rs6857237	137030990	G	C	0.011672	0.786567	...
4	rs4864315	137051564	G	A	0.0104393	0.797006	...
4	rs2204515	137044554	C	A	0.0104108	0.807417	...
4	rs1917955	137053594	C	T	0.0103357	0.817753	...
4	rs6535137	137027518	C	T	0.00968339	0.827436	...
4	rs10013192	137023288	G	A	0.00944827	0.836884	...
4	rs10026003	137011048	C	T	0.00934868	0.846233	...
4	rs10857189	136966779	T	C	0.00909198	0.855325	...
4	rs1917957	137026431	A	T	0.0088175	0.864142	...
4	rs1724551	137064123	A	G	0.00843017	0.872573	...
4	rs2405504	137045104	C	G	0.00804873	0.880621	...
4	rs1283045	137059766	C	T	0.00796892	0.88859	...
4	rs3762889	137040082	C	T	0.00742327	0.896013	...
4	rs6813963	137044262	A	G	0.00738206	0.903396	...
4	rs1283046	137059671	A	T	0.00679087	0.910186	...
4	rs2122701	137067847	C	T	0.00640229	0.916589	...
4	chr4:137047521:I	137047521	TC	T	0.00580055	0.922389	...
4	chr4:137003862:I	137003862	CA	C	0.00330678	0.925696	...
4	rs13435860	136975545	T	A	0.0032142	0.92891	...
4	chr4:137008869:I	137008869	GA	G	0.00300542	0.931916	...
4	rs11099376	137036556	C	T	0.00285878	0.934774	...
4	rs2405510	137015683	G	C	0.0023698	0.937144	...
4	rs1724557	137094048	C	A	0.0020233	0.939168	...
4	rs1283032	137098470	T	C	0.00175027	0.940918	...
4	rs1724556	137094047	C	A	0.00173633	0.942654	...
4	rs1597599	137206197	A	G	0.00167273	0.944327	...
4	rs7691907	137151854	C	T	0.00144064	0.945768	...
4	rs1451109	137071335	G	A	0.00143145	0.947199	...
4	rs10018743	136972541	A	G	0.00135265	0.948552	...
4	rs13107070	137184518	A	C	0.00130687	0.949858	...
4	chr4:137037553:D	137037553	T	TATCC	0.00129792	0.951156	...
5	rs7730898	170459675	G	A	0.237899	0.237899	RANBP17
5	rs6555936	170610273	G	A	0.054738	0.292637	RANBP17
5	rs9313530	170368907	A	C	0.0529915	0.345629	RANBP17
5	rs10038105	170354039	T	G	0.048301	0.39393	RANBP17
5	rs1445796	170583569	G	A	0.0436602	0.43759	RANBP17
5	rs29652	170548212	G	A	0.0371954	0.474785	RANBP17
5	rs173465	170535815	G	A	0.0364499	0.511235	RANBP17
5	rs39784	170559066	C	A	0.0345962	0.545831	RANBP17
5	rs29648	170559580	A	G	0.0281393	0.57397	RANBP17
5	rs2287894	170322919	T	A	0.0226228	0.596593	RANBP17
5	rs4867646	170580152	T	C	0.0223371	0.61893	RANBP17
5	rs6892220	170422587	G	A	0.02122	0.64015	RANBP17
5	rs29649	170544147	A	G	0.0206629	0.660813	RANBP17
5	rs779669	170555653	G	A	0.0182377	0.679051	RANBP17
5	rs2339234	170612546	G	A	0.0179561	0.697007	RANBP17
5	rs779655	170495158	G	C	0.0175883	0.714595	RANBP17
5	rs7730676	170611224	C	T	0.0169192	0.731515	RANBP17
5	rs1598811	170466238	T	A	0.016239	0.747754	RANBP17
5	rs812949	170506141	T	C	0.0155167	0.76327	RANBP17
5	rs11134679	170623391	A	G	0.0151883	0.778459	RANBP17
5	rs4868051	170387521	T	C	0.014376	0.792835	RANBP17
5	rs245769	170529335	C	T	0.0141492	0.806984	RANBP17
5	rs245774	170530930	A	G	0.0136802	0.820664	RANBP17
5	rs245767	170525393	A	G	0.0134225	0.834086	RANBP17
5	rs10462899	170445842	C	T	0.0129123	0.846999	RANBP17
5	rs2112404	170298583	C	T	0.012651	0.85965	RANBP17
5	rs2591497	170517036	G	C	0.0124043	0.872054	RANBP17
5	rs2339233	170573778	T	C	0.0122008	0.884255	RANBP17
5	rs245775	170532105	A	G	0.0118373	0.896092	RANBP17
5	rs4868069	170568740	G	A	0.0115776	0.90767	RANBP17
5	rs2608099	170518104	T	C	0.0114147	0.919084	RANBP17
5	rs245770	170529598	A	G	0.0110957	0.93018	RANBP17
5	rs2591496	170516965	G	A	0.00793692	0.938117	RANBP17
5	rs11749349	170288922	A	G	0.00754988	0.945667	RANBP17
5	rs2053682	170599327	C	A	0.0059768	0.951644	RANBP17
6	rs501521	69577447	A	G	0.213299	0.213299	BAI3
6	rs505031	69577789	T	C	0.212203	0.425502	BAI3
6	chr6:69544628:I	69544628	A	AT	0.208898	0.6344	BAI3
6	chr6:69602083:D	69602083	T	TCTAAA	0.174404	0.808804	BAI3
6	chr6:69590667:D	69590667	AATAT	A	0.0942286	0.903032	BAI3
6	chr6:70053033:D	70053033	AT	A	0.00400321	0.907035	BAI3
6	rs513357	69558698	A	G	0.00196536	0.909001	BAI3
6	chr6:69828346:D	69828346	G	GC	0.00133127	0.910332	BAI3
6	rs4706713	69598231	G	T	0.00118966	0.911522	BAI3
6	rs478319	69557192	T	G	0.000960281	0.912482	BAI3
6	rs779463	69942066	T	G	0.000850101	0.913332	BAI3
6	rs514518	69541114	C	A	0.000802933	0.914135	BAI3
6	rs4706883	69863899	A	T	0.000783838	0.914919	BAI3
6	rs779460	69948471	G	A	0.000719528	0.915638	BAI3
6	chr6:69899475:D	69899475	C	CT	0.000676243	0.916314	BAI3
6	chr6:69836621:D	69836621	G	GCTAT	0.000580639	0.916895	BAI3
6	chr6:69662672:I	69662672	AC	A	0.00047146	0.917367	BAI3
6	rs556592	69576000	A	G	0.000462205	0.917829	BAI3
6	rs566190	69561759	A	G	0.000440735	0.91827	BAI3
6	rs507388	69593296	T	C	0.000430924	0.9187	BAI3
6	rs528341	69575238	A	G	0.000427663	0.919128	BAI3
6	rs779484	69900102	C	T	0.00042648	0.919555	BAI3
6	rs3799048	69879284	A	T	0.000418792	0.919973	BAI3
6	rs2343259	69859138	G	C	0.000397609	0.920371	BAI3
6	chr6:69692829:D	69692829	C	CAGA	0.000386228	0.920757	BAI3
6	rs2207435	69554609	G	A	0.000384693	0.921142	BAI3
6	rs779493	69884855	C	T	0.000376581	0.921518	BAI3
6	rs6932340	70056939	T	G	0.000365089	0.921884	BAI3
6	rs2343257	69835704	T	C	0.000358019	0.922242	BAI3
6	rs2343261	69859598	C	T	0.000349165	0.922591	BAI3
6	rs13214486	69850591	G	A	0.000348181	0.922939	BAI3
6	rs525874	69561562	C	A	0.000341705	0.923281	BAI3
6	rs526501	69575044	T	G	0.000340817	0.923621	BAI3
6	rs518164	69580684	C	T	0.000338689	0.92396	BAI3
6	rs7774791	69554171	C	G	0.000336062	0.924296	BAI3
6	chr6:69538555:I	69538555	G	GGCT	0.000325477	0.924622	BAI3
6	rs1283473	70056349	A	T	0.000321842	0.924944	BAI3
6	rs483833	69567241	G	A	0.000307931	0.925251	BAI3
6	rs563952	69572779	T	G	0.000305767	0.925557	BAI3
6	rs551777	69552659	T	C	0.00030455	0.925862	BAI3
6	rs546970	69552103	T	C	0.000304413	0.926166	BAI3
6	rs491998	69550688	G	A	0.000303036	0.926469	BAI3
6	rs1988054	69566718	G	C	0.000299703	0.926769	BAI3
6	chr6:69564423:I	69564423	TA	T	0.000298377	0.927067	BAI3
6	rs493606	69560278	T	C	0.000293678	0.927361	BAI3
6	rs72906706	69649319	A	C	0.000289359	0.92765	BAI3
6	rs518311	69580726	A	G	0.000284793	0.927935	BAI3
6	rs544495	69548012	A	G	0.000279504	0.928215	BAI3
6	rs508591	69578161	T	G	0.000273381	0.928488	BAI3
6	rs569272	69548406	T	C	0.000272497	0.928761	BAI3
6	rs9454635	69599646	A	G	0.000270147	0.929031	BAI3
6	rs72908741	69731849	T	C	0.000268934	0.9293	BAI3
6	rs483076	69549098	A	G	0.000261752	0.929561	BAI3
6	chr6:69574414:I	69574414	G	GA	0.00025456	0.929816	BAI3
6	rs185622323	69965049	G	A	0.000236808	0.930053	BAI3
6	chr6:69824588:D	69824588	A	AG	0.000236328	0.930289	BAI3
6	rs72903001	69608392	T	C	0.000233443	0.930522	BAI3
6	chr6:69596950:I	69596950	AAT	A	0.000211074	0.930734	BAI3
6	rs1482326	69844768	A	G	0.000206128	0.93094	BAI3
6	rs56016894	69610898	T	A	0.000204003	0.931144	BAI3
6	rs9294819	69836379	T	C	0.00019947	0.931343	BAI3
6	rs9454705	69850406	A	G	0.000178897	0.931522	BAI3
6	chr6:69197444:D	69197444	T	TGG	0.000178847	0.931701	...
6	rs526156	69556840	A	C	0.000171867	0.931873	BAI3
6	rs562167	69544787	C	A	0.000171115	0.932044	BAI3
6	rs9342743	69859639	A	G	0.000167003	0.932211	BAI3
6	chr6:69576009:D	69576009	TA	T	0.000161256	0.932372	BAI3
6	rs12215081	69772394	T	G	0.00015406	0.932526	BAI3
6	rs1885331	70007550	G	T	0.000151862	0.932678	BAI3
6	chr6:69574783:D	69574783	TAG	T	0.000150825	0.932829	BAI3
6	rs7746793	69840480	A	T	0.000149998	0.932979	BAI3
6	rs9360375	69832831	A	T	0.000149568	0.933128	BAI3
6	chr6:69662540:D	69662540	T	TA	0.000148088	0.933277	BAI3
6	rs6940312	69663213	T	A	0.00014693	0.933423	BAI3
6	rs9363985	69842129	T	C	0.000144402	0.933568	BAI3
6	rs10455682	69802660	C	G	0.000139394	0.933707	BAI3
6	rs9446095	69825514	G	T	0.000139122	0.933846	BAI3
6	rs9346258	69589222	C	T	0.000136776	0.933983	BAI3
6	rs1600876	69829689	T	A	0.000133526	0.934117	BAI3
6	rs9454727	70003389	G	A	0.000132434	0.934249	BAI3
6	rs314212	69863661	A	G	0.000131448	0.934381	BAI3
6	rs7759645	69817329	A	G	0.000130051	0.934511	BAI3
6	rs2343262	69863660	C	T	0.000128894	0.93464	BAI3
6	rs1600874	69859295	G	A	0.000127234	0.934767	BAI3
6	rs9454708	69858532	A	C	0.000126206	0.934893	BAI3
6	rs7761948	69769972	T	C	0.000125939	0.935019	BAI3
6	chr6:69575136:D	69575136	AT	A	0.00012449	0.935143	BAI3
6	chr6:69538556:I	69538556	G	GCTGA	0.000122699	0.935266	BAI3
6	rs10455681	69802502	G	A	0.000120047	0.935386	BAI3
6	rs9454725	69989413	C	T	0.000118983	0.935505	BAI3
6	rs9446098	69850349	G	A	0.000118245	0.935623	BAI3
6	rs145781308	69650725	G	A	0.000117908	0.935741	BAI3
6	chr6:69576011:D	69576011	A	AG	0.000117418	0.935859	BAI3
6	rs72906780	69693159	T	C	0.000117361	0.935976	BAI3
6	rs3799027	69794071	T	G	0.000117354	0.936093	BAI3
6	rs9454704	69838021	A	C	0.000114134	0.936208	BAI3
6	rs688606	69784174	A	T	0.00011131	0.936319	BAI3
6	rs7752008	69824641	C	A	0.000109456	0.936428	BAI3
6	rs9446090	69783065	T	A	0.000108086	0.936536	BAI3
6	rs779477	69920680	T	C	0.000106786	0.936643	BAI3
6	rs779472	69927053	T	C	0.000106062	0.936749	BAI3
6	rs72921224	69858561	T	C	0.000105465	0.936855	BAI3
6	rs12209170	69959318	A	G	0.000104325	0.936959	BAI3
6	rs1482325	69806978	C	T	0.000103724	0.937063	BAI3
6	rs72921213	69856985	T	C	0.000103292	0.937166	BAI3
6	rs10455680	69768987	C	T	0.000100405	0.937266	BAI3
6	rs9454686	69790536	T	C	0.000100309	0.937367	BAI3
6	rs9454702	69832216	T	C	9.75406e-05	0.937464	BAI3
6	rs9446083	69711901	A	G	9.64081e-05	0.937561	BAI3
6	rs644877	69477425	T	A	9.63473e-05	0.937657	BAI3
6	rs9363983	69818593	T	G	9.59674e-05	0.937753	BAI3
6	rs728083	69822457	G	C	9.58426e-05	0.937849	BAI3
6	rs9446084	69712390	T	C	9.54653e-05	0.937944	BAI3
6	rs9454688	69796984	T	G	9.54552e-05	0.93804	BAI3
6	rs72910629	69761994	G	A	9.42783e-05	0.938134	BAI3
6	rs12198653	69971086	T	C	9.174e-05	0.938226	BAI3
6	rs7773117	69456333	T	C	8.96263e-05	0.938315	BAI3
6	rs1889878	69736293	T	C	8.92277e-05	0.938405	BAI3
6	rs72917470	69783516	A	T	8.90397e-05	0.938494	BAI3
6	rs17747612	69974042	C	T	8.79196e-05	0.938582	BAI3
6	rs6904267	69756110	T	G	8.7536e-05	0.938669	BAI3
6	rs493768	69549897	T	C	8.7431e-05	0.938757	BAI3
6	rs1297485	69743290	A	G	8.73944e-05	0.938844	BAI3
6	chr6:70016193:I	70016193	ACTT	A	8.73246e-05	0.938931	BAI3
6	chr6:69546243:I	69546243	AT	A	8.48916e-05	0.939016	BAI3
6	rs7760307	69752783	A	G	8.37442e-05	0.9391	BAI3
6	rs2210867	69746054	T	C	8.25579e-05	0.939183	BAI3
6	rs9454698	69831392	A	G	8.14782e-05	0.939264	BAI3
6	rs12212638	69752897	T	C	8.12815e-05	0.939345	BAI3
6	rs9454670	69714369	G	A	8.12401e-05	0.939427	BAI3
6	rs6924533	69476245	G	A	8.01792e-05	0.939507	BAI3
6	rs580073	69546221	T	C	7.96549e-05	0.939586	BAI3
6	rs779488	69892724	G	A	7.9468e-05	0.939666	BAI3
6	rs3799070	69964019	C	A	7.90035e-05	0.939745	BAI3
6	rs143927751	69831085	A	G	7.89184e-05	0.939824	BAI3
6	rs1953613	69677917	A	G	7.87359e-05	0.939902	BAI3
6	rs12189742	69851063	C	T	7.81066e-05	0.939981	BAI3
6	rs6455298	69470321	C	T	7.73981e-05	0.940058	BAI3
6	rs139792964	69831426	A	G	7.73613e-05	0.940135	BAI3
6	rs559851	69782518	C	A	7.58998e-05	0.940211	BAI3
6	rs9446085	69726362	T	C	7.50681e-05	0.940286	BAI3
6	rs7743332	69747028	G	A	7.332e-05	0.94036	BAI3
6	chr6:69775690:D	69775690	C	CAT	7.20227e-05	0.940432	BAI3
6	rs12213405	69718158	T	C	7.18187e-05	0.940503	BAI3
6	rs1523947	69483708	G	A	7.16935e-05	0.940575	BAI3
6	rs7756637	69730074	T	A	7.14405e-05	0.940647	BAI3
6	rs3799017	69738395	A	G	7.09365e-05	0.940718	BAI3
6	rs9454639	69605817	A	G	7.09098e-05	0.940788	BAI3
6	rs3799077	69996217	G	T	7.08929e-05	0.940859	BAI3
6	rs117635466	69918858	C	T	6.95184e-05	0.940929	BAI3
6	rs6920896	69716589	A	C	6.92571e-05	0.940998	BAI3
6	rs9454683	69756911	A	G	6.90214e-05	0.941067	BAI3
6	rs72921210	69856206	T	G	6.89835e-05	0.941136	BAI3
6	rs7756040	69746447	A	G	6.73149e-05	0.941203	BAI3
6	rs7751539	69496928	G	T	6.6873e-05	0.94127	BAI3
6	rs3799002	69715466	T	C	6.62794e-05	0.941337	BAI3
6	rs3799024	69777361	C	A	6.59217e-05	0.941403	BAI3
6	rs9446089	69767587	A	G	6.57268e-05	0.941468	BAI3
6	rs1357619	69494827	A	G	6.55492e-05	0.941534	BAI3
6	rs779017	69771582	T	C	6.55243e-05	0.941599	BAI3
6	rs7764479	69753107	A	G	6.53294e-05	0.941665	BAI3
6	rs9354796	69430960	C	T	6.50401e-05	0.94173	BAI3
6	rs654801	69770961	C	A	6.49975e-05	0.941795	BAI3
6	rs12207529	69665063	G	T	6.49039e-05	0.94186	BAI3
6	rs500125	69560985	G	A	6.46442e-05	0.941924	BAI3
6	rs1336651	69745491	A	G	6.42526e-05	0.941988	BAI3
6	rs3757047	69729902	T	G	6.39833e-05	0.942052	BAI3
6	rs3823066	69725074	A	G	6.38892e-05	0.942116	BAI3
6	rs947221	69733057	A	G	6.37929e-05	0.94218	BAI3
6	rs1889877	69729678	A	G	6.3749e-05	0.942244	BAI3
6	rs634695	69776639	T	A	6.37411e-05	0.942308	BAI3
6	rs2343396	69724468	T	A	6.36478e-05	0.942371	BAI3
6	rs1336655	69724069	A	G	6.364e-05	0.942435	BAI3
6	rs9446091	69785484	C	T	6.34119e-05	0.942498	BAI3
6	rs1007921	69753460	A	G	6.32628e-05	0.942562	BAI3
6	rs9454693	69808955	T	G	6.30136e-05	0.942625	BAI3
6	rs992784	69494786	T	C	6.29849e-05	0.942688	BAI3
6	rs6907661	69500849	C	T	6.29207e-05	0.942751	BAI3
6	rs77579315	69737907	A	C	6.2661e-05	0.942813	BAI3
6	rs9454699	69831567	A	G	6.25041e-05	0.942876	BAI3
6	rs1415036	69726135	C	T	6.24785e-05	0.942938	BAI3
6	rs3757046	69729831	T	C	6.24535e-05	0.943001	BAI3
6	rs6922214	69968484	G	A	6.23961e-05	0.943063	BAI3
6	rs3799016	69738247	A	T	6.2328e-05	0.943125	BAI3
6	rs2785576	69773460	G	A	6.20758e-05	0.943187	BAI3
6	rs4554293	69779480	G	A	6.17881e-05	0.943249	BAI3
6	rs1336635	69720474	G	A	6.13508e-05	0.943311	BAI3
6	rs1336636	69720242	T	A	6.11043e-05	0.943372	BAI3
6	rs1556756	69718895	A	G	6.10594e-05	0.943433	BAI3
6	rs13192798	69721161	G	T	6.09345e-05	0.943494	BAI3
6	rs4706711	69596380	C	T	6.08901e-05	0.943555	BAI3
6	rs12194774	69718024	G	T	6.00367e-05	0.943615	BAI3
6	rs12194946	69718262	C	T	5.99525e-05	0.943675	BAI3
6	rs9454685	69786931	T	C	5.99356e-05	0.943734	BAI3
6	chr6:69552935:I	69552935	TACA	T	5.95498e-05	0.943794	BAI3
6	rs491928	69560139	C	T	5.93669e-05	0.943853	BAI3
6	rs9346259	69589269	T	C	5.89722e-05	0.943912	BAI3
6	rs618714	69775349	G	T	5.89063e-05	0.943971	BAI3
6	rs28587592	69753226	A	G	5.87793e-05	0.94403	BAI3
6	rs3823067	69730201	A	G	5.85008e-05	0.944089	BAI3
6	rs501140	69559209	C	T	5.83599e-05	0.944147	BAI3
6	rs9360357	69369976	A	T	5.83501e-05	0.944205	BAI3
6	rs2206834	69507819	G	A	5.82741e-05	0.944264	BAI3
6	rs2177448	69518233	A	G	5.78713e-05	0.944321	BAI3
6	rs12191037	69667954	A	G	5.75545e-05	0.944379	BAI3
6	rs10945140	69459630	C	T	5.73811e-05	0.944436	BAI3
6	rs9454674	69720766	C	G	5.70547e-05	0.944493	BAI3
6	rs72906736	69668138	G	A	5.63705e-05	0.94455	BAI3
6	rs7747313	69461779	G	A	5.52874e-05	0.944605	BAI3
6	rs536054	69560780	G	T	5.50265e-05	0.94466	BAI3
6	rs72908774	69738686	C	T	5.49416e-05	0.944715	BAI3
6	rs2206836	69461441	T	C	5.47746e-05	0.94477	BAI3
6	rs6911395	69514543	G	C	5.46876e-05	0.944824	BAI3
6	rs1415029	69716226	A	G	5.46015e-05	0.944879	BAI3
6	rs12191480	69675867	C	T	5.43769e-05	0.944933	BAI3
6	rs6455303	69511921	C	T	5.38071e-05	0.944987	BAI3
6	rs6929378	69510211	G	A	5.37397e-05	0.945041	BAI3
6	rs9446087	69732444	T	C	5.36028e-05	0.945095	BAI3
6	rs653895	69770759	A	C	5.33388e-05	0.945148	BAI3
6	rs2880145	69359708	A	T	5.26743e-05	0.945201	BAI3
6	rs7767118	69748672	A	G	5.26466e-05	0.945253	BAI3
6	rs9454691	69807659	G	A	5.23858e-05	0.945306	BAI3
6	rs502221	69530387	G	A	5.22966e-05	0.945358	BAI3
6	rs1858395	69936152	T	C	5.22079e-05	0.94541	BAI3
6	rs1336633	69848733	G	T	5.18995e-05	0.945462	BAI3
6	rs9294810	69518935	A	C	5.18318e-05	0.945514	BAI3
6	rs9346263	69830957	A	G	5.15478e-05	0.945565	BAI3
6	chr6:69621311:I	69621311	TA	T	5.13027e-05	0.945617	BAI3
6	rs680726	69772098	T	C	5.12136e-05	0.945668	BAI3
6	rs507326	69564646	T	G	5.09057e-05	0.945719	BAI3
6	rs573776	69576683	A	G	5.07142e-05	0.94577	BAI3
6	rs4708231	69362192	A	T	5.06953e-05	0.94582	BAI3
6	rs6932940	69431665	A	G	5.06228e-05	0.945871	BAI3
6	rs493317	69759736	G	A	5.05697e-05	0.945921	BAI3
6	rs547423	69564830	A	G	5.05229e-05	0.945972	BAI3
6	rs492823	69560235	C	T	5.04813e-05	0.946022	BAI3
6	rs2224014	69566849	C	G	5.00994e-05	0.946073	BAI3
6	rs9446086	69726515	T	C	5.00214e-05	0.946123	BAI3
6	rs480816	69569533	T	A	4.99739e-05	0.946173	BAI3
6	rs563146	69544896	A	G	4.98032e-05	0.946222	BAI3
6	rs779492	69888173	T	A	4.97383e-05	0.946272	BAI3
6	rs3757050	69785765	G	C	4.95081e-05	0.946322	BAI3
6	rs540437	69525629	T	C	4.94742e-05	0.946371	BAI3
6	rs492831	69577628	A	G	4.92301e-05	0.94642	BAI3
6	rs1298521	69745864	C	T	4.87583e-05	0.946469	BAI3
6	rs635863	69769070	C	A	4.85969e-05	0.946518	BAI3
6	rs7738291	69432067	T	A	4.84962e-05	0.946566	BAI3
6	rs6915681	69879389	C	A	4.84743e-05	0.946615	BAI3
6	rs6903692	69495084	C	T	4.8451e-05	0.946663	BAI3
6	rs947220	69736820	C	G	4.84492e-05	0.946712	BAI3
6	rs12197583	69664663	A	C	4.8317e-05	0.94676	BAI3
6	rs530244	69571461	T	A	4.82307e-05	0.946808	BAI3
6	rs7770947	69745154	G	A	4.8045e-05	0.946856	BAI3
6	rs540974	69547642	G	T	4.80388e-05	0.946904	BAI3
6	rs509043	69770221	A	G	4.80238e-05	0.946952	BAI3
6	rs483942	69549203	C	T	4.79299e-05	0.947	BAI3
6	rs553613	69557496	A	G	4.79263e-05	0.947048	BAI3
6	rs6455295	69431839	G	A	4.79123e-05	0.947096	BAI3
6	rs526898	69781209	A	C	4.78373e-05	0.947144	BAI3
6	rs9351741	69556571	C	G	4.7708e-05	0.947192	BAI3
6	rs579304	69546164	T	C	4.7537e-05	0.947239	BAI3
6	rs551876	69545429	G	A	4.75267e-05	0.947287	BAI3
6	rs486413	69550082	C	T	4.7367e-05	0.947334	BAI3
6	rs527932	69557000	C	A	4.731e-05	0.947381	BAI3
6	rs7747314	69461786	G	A	4.72615e-05	0.947429	BAI3
6	rs484935	69770564	T	C	4.72504e-05	0.947476	BAI3
6	rs2005033	69773686	A	G	4.71588e-05	0.947523	BAI3
6	rs7746943	69358039	C	T	4.71496e-05	0.94757	BAI3
6	rs525342	69556783	A	G	4.70708e-05	0.947617	BAI3
6	rs6455296	69436815	C	T	4.69723e-05	0.947664	BAI3
6	rs6916250	69879718	G	A	4.69576e-05	0.947711	BAI3
6	rs541027	69559455	A	T	4.68495e-05	0.947758	BAI3
6	rs7739996	69442076	C	A	4.68163e-05	0.947805	BAI3
6	rs522513	69556446	C	T	4.66589e-05	0.947851	BAI3
6	rs510779	69546639	C	T	4.64702e-05	0.947898	BAI3
6	rs489218	69549413	G	T	4.64245e-05	0.947944	BAI3
6	rs1482323	69783308	C	T	4.63842e-05	0.947991	BAI3
6	rs9294806	69439486	C	T	4.62936e-05	0.948037	BAI3
6	rs497728	69555985	C	T	4.61166e-05	0.948083	BAI3
6	rs483875	69545996	G	T	4.61143e-05	0.948129	BAI3
6	rs555588	69545855	T	C	4.61094e-05	0.948175	BAI3
6	rs482005	69545793	G	T	4.61077e-05	0.948221	BAI3
6	rs485864	69776186	T	C	4.60833e-05	0.948267	BAI3
6	rs314216	69875285	A	G	4.60253e-05	0.948314	BAI3
6	rs693242	69773923	A	G	4.59364e-05	0.948359	BAI3
6	chr6:69828350:D	69828350	A	AG	4.58748e-05	0.948405	BAI3
6	rs1523936	69605682	C	T	4.58249e-05	0.948451	BAI3
6	rs527872	69781317	T	A	4.56338e-05	0.948497	BAI3
6	rs16900526	69836041	T	G	4.55585e-05	0.948542	BAI3
6	rs550090	69551822	G	A	4.55392e-05	0.948588	BAI3
6	rs523137	69551798	G	C	4.55389e-05	0.948633	BAI3
6	rs518644	69551323	T	C	4.55299e-05	0.948679	BAI3
6	rs519614	69551449	T	C	4.55293e-05	0.948724	BAI3
6	rs487408	69550199	A	G	4.5498e-05	0.94877	BAI3
6	rs528718	69548068	A	C	4.54765e-05	0.948815	BAI3
6	rs536322	69547126	A	G	4.52157e-05	0.948861	BAI3
6	rs492229	69550764	G	T	4.52114e-05	0.948906	BAI3
6	rs506211	69546138	C	T	4.51973e-05	0.948951	BAI3
6	rs580034	69553463	A	G	4.51707e-05	0.948996	BAI3
6	rs6920573	69554813	T	A	4.51354e-05	0.949041	BAI3
6	rs6941602	69554790	G	C	4.5132e-05	0.949087	BAI3
6	chr6:69528838:I	69528838	T	TAA	4.51268e-05	0.949132	BAI3
6	rs580767	69553484	C	T	4.51248e-05	0.949177	BAI3
6	rs9342736	69554514	A	G	4.51124e-05	0.949222	BAI3
6	rs9346252	69554526	T	G	4.51124e-05	0.949267	BAI3
6	rs9342735	69554285	C	A	4.51106e-05	0.949312	BAI3
6	rs9346251	69554294	G	A	4.51106e-05	0.949357	BAI3
6	rs1320613	69735256	A	T	4.50551e-05	0.949402	BAI3
6	rs1120509	69566846	A	G	4.49552e-05	0.949447	BAI3
6	rs492863	69552996	T	C	4.48582e-05	0.949492	BAI3
6	rs518704	69568733	G	T	4.47774e-05	0.949537	BAI3
6	rs580182	69546258	T	C	4.4685e-05	0.949582	BAI3
6	rs9346246	69520926	C	A	4.46244e-05	0.949626	BAI3
6	rs2224011	69555181	C	A	4.46041e-05	0.949671	BAI3
6	rs7743793	69446506	A	G	4.45789e-05	0.949715	BAI3
6	rs497240	69542291	T	C	4.45379e-05	0.94976	BAI3
6	rs6455306	69571053	T	C	4.4488e-05	0.949804	BAI3
6	rs2793459	69772817	C	G	4.44437e-05	0.949849	BAI3
6	rs2746133	69422753	C	T	4.44078e-05	0.949893	BAI3
6	rs550695	69569884	G	A	4.43808e-05	0.949938	BAI3
6	rs55776408	69847812	A	G	4.43134e-05	0.949982	BAI3
6	rs550348	69581899	G	A	4.43029e-05	0.950026	BAI3
6	rs947612	73738661	G	A	0.634909	0.634909	KCNQ5
6	rs6921533	73742334	T	C	0.0662354	0.701144	KCNQ5
6	rs6453620	73744033	T	C	0.0546119	0.755756	KCNQ5
6	rs7776021	73742152	A	G	0.0474709	0.803227	KCNQ5
6	chr6:73739221:I	73739221	G	GT	0.0369567	0.840184	KCNQ5
6	rs3798463	73752821	C	T	0.00482095	0.845005	KCNQ5
6	rs1539348	73710903	A	G	0.00362608	0.848631	KCNQ5
6	rs61743058	73904557	T	C	0.0026004	0.851231	KCNQ5
6	rs144622646	73902915	C	T	0.00211489	0.853346	KCNQ5
6	rs9341391	73658344	A	G	0.00200398	0.85535	KCNQ5
6	rs10498891	73891434	C	T	0.00185743	0.857207	KCNQ5
6	rs9343016	73899356	A	G	0.00165281	0.85886	KCNQ5
6	rs2882406	73877301	G	A	0.00151829	0.860378	KCNQ5
6	rs2350388	73877404	C	T	0.00133233	0.861711	KCNQ5
6	rs10943073	73658988	T	G	0.00107381	0.862785	KCNQ5
6	rs1974371	73917498	G	A	0.00104804	0.863833	...
6	rs9293925	73898661	G	A	0.00103217	0.864865	KCNQ5
6	rs2350748	73708347	C	A	0.00102635	0.865891	KCNQ5
6	rs9446824	73737716	G	A	0.00102242	0.866914	KCNQ5
6	rs2000203	73697066	G	A	0.00102076	0.867934	KCNQ5
6	rs947749	73919172	C	T	0.00101653	0.868951	...
6	rs12195276	73657714	C	T	0.000920866	0.869872	KCNQ5
6	rs3799286	73897278	G	A	0.00091776	0.870789	KCNQ5
6	rs1974373	73917316	A	G	0.000870882	0.87166	...
6	rs9360648	73914241	A	T	0.000853588	0.872514	...
6	rs1974372	73917439	A	G	0.000823259	0.873337	...
6	rs6929988	73914319	T	C	0.000813732	0.874151	...
6	rs3897515	73919000	C	T	0.000812259	0.874963	...
6	rs7769085	73869714	T	G	0.00078223	0.875745	KCNQ5
6	rs947750	73919171	G	A	0.000780355	0.876526	...
6	rs4301273	73919726	G	T	0.000767694	0.877293	...
6	rs9360647	73896940	G	A	0.000730388	0.878024	KCNQ5
6	rs2350371	73920998	A	G	0.000721191	0.878745	...
6	rs10943080	73916577	A	G	0.000714462	0.879459	...
6	rs7752003	73923881	C	T	0.000712378	0.880172	...
6	rs1974369	73864494	A	G	0.000701866	0.880874	KCNQ5
6	rs6453655	73920553	A	T	0.000690606	0.881564	...
6	rs16883209	73741071	G	A	0.000688043	0.882252	KCNQ5
6	rs6938299	73912505	G	A	0.000684971	0.882937	...
6	rs2350372	73920866	C	T	0.000683731	0.883621	...
6	rs6935193	73920804	C	T	0.000683722	0.884305	...
6	rs2350382	73918467	A	G	0.000680059	0.884985	...
6	rs72948806	73883670	G	A	0.000680049	0.885665	KCNQ5
6	rs2882400	73920256	A	G	0.000676041	0.886341	...
6	rs6453654	73917949	T	C	0.000675844	0.887017	...
6	rs2350374	73920264	T	C	0.000675758	0.887693	...
6	rs12214787	73924628	A	G	0.00067517	0.888368	...
6	rs6453653	73917645	T	A	0.000660438	0.889028	...
6	rs7744556	73913917	T	C	0.000660273	0.889688	...
6	rs7755953	73916042	A	G	0.00065218	0.890341	...
6	rs7744796	73913841	C	G	0.000651347	0.890992	...
6	rs9360650	73918700	G	C	0.000645668	0.891638	...
6	rs2350379	73918669	C	G	0.000645412	0.892283	...
6	rs41265513	73918665	A	G	0.000645387	0.892928	...
6	rs2350378	73918924	A	G	0.00064133	0.89357	...
6	rs11756520	73914554	T	C	0.000640879	0.894211	...
6	rs947752	73918929	T	C	0.000637431	0.894848	...
6	rs16883205	73740571	T	C	0.00063464	0.895483	KCNQ5
6	rs28674715	73918422	A	C	0.000631634	0.896114	...
6	rs13204079	73915866	T	C	0.000627567	0.896742	...
6	rs9689607	73922707	A	C	0.000626897	0.897369	...
6	rs34641595	73914645	A	T	0.000620238	0.897989	...
6	rs2882402	73919713	G	A	0.00061731	0.898606	...
6	rs9351982	73923204	C	T	0.000616665	0.899223	...
6	rs7744755	73914102	C	A	0.000615987	0.899839	...
6	rs2350383	73918434	T	G	0.000615731	0.900455	...
6	rs2350376	73919032	T	G	0.000614985	0.90107	...
6	rs6935176	73920778	C	T	0.000612172	0.901682	...
6	rs62411434	73923694	A	G	0.000611298	0.902293	...
6	rs9351958	73661010	C	G	0.0006067	0.9029	KCNQ5
6	rs9351981	73923058	C	T	0.000604322	0.903504	...
6	rs884957	73867050	G	A	0.000601483	0.904106	KCNQ5
6	rs2882401	73920165	A	G	0.000592881	0.904699	...
6	rs4991402	73920177	G	A	0.000592638	0.905291	...
6	rs12215253	73919463	A	G	0.000591867	0.905883	...
6	rs4991401	73920422	G	T	0.000591796	0.906475	...
6	rs2350375	73919087	A	G	0.00059177	0.907067	...
6	rs2350377	73918987	T	C	0.000591746	0.907658	...
6	rs4639295	73919869	G	A	0.000584575	0.908243	...
6	rs9343020	73922906	T	C	0.000573409	0.908816	...
6	rs16883089	73658053	C	T	0.000569968	0.909386	KCNQ5
6	rs16883192	73738533	T	A	0.000568603	0.909955	KCNQ5
6	rs1815726	73876177	C	T	0.000564333	0.910519	KCNQ5
6	rs9343018	73911472	C	T	0.000559895	0.911079	...
6	rs9360651	73923094	G	A	0.000559579	0.911639	...
6	chr6:73808709:D	73808709	A	AG	0.000558757	0.912198	KCNQ5
6	rs6453646	73867903	G	C	0.000554714	0.912752	KCNQ5
6	rs7770071	73923937	T	C	0.000545885	0.913298	...
6	rs7749994	73915002	C	A	0.000544888	0.913843	...
6	rs9360653	73924930	G	A	0.000542238	0.914385	...
6	rs2882403	73919573	G	A	0.000541617	0.914927	...
6	rs2350384	73916705	T	C	0.000529626	0.915456	...
6	rs9689602	73922416	A	G	0.000526938	0.915983	...
6	chr6:73808704:D	73808704	C	CA	0.000522154	0.916506	KCNQ5
6	rs2350381	73918583	A	C	0.000521607	0.917027	...
6	rs4640856	73919612	G	A	0.000519879	0.917547	...
6	rs7770723	73924211	A	G	0.00051618	0.918063	...
6	chr6:73814165:D	73814165	A	AT	0.000511481	0.918575	KCNQ5
6	rs13212438	73923431	A	G	0.000510913	0.919086	...
6	rs35052732	73923475	G	A	0.000510887	0.919597	...
6	rs6453645	73867838	C	G	0.00050606	0.920103	KCNQ5
6	rs1815728	73875931	A	G	0.000504089	0.920607	KCNQ5
6	rs13206405	73663814	A	C	0.000502324	0.921109	KCNQ5
6	rs77895919	73851570	C	T	0.000501071	0.92161	KCNQ5-KCNQ5-AS1
6	rs2350387	73877424	G	A	0.000495971	0.922106	KCNQ5
6	rs4991400	73920435	A	T	0.000494868	0.922601	...
6	rs7763514	73877796	C	T	0.000472683	0.923074	KCNQ5
6	rs6453618	73740314	T	C	0.00047207	0.923546	KCNQ5
6	rs7748418	73869476	A	G	0.000466242	0.924012	KCNQ5
6	rs6453648	73867938	T	A	0.000461117	0.924473	KCNQ5
6	rs9360652	73923241	A	G	0.000458757	0.924932	...
6	rs7747411	73874759	C	T	0.000451755	0.925384	KCNQ5
6	rs13206617	73663745	T	G	0.000446692	0.92583	KCNQ5
6	rs947748	73875304	G	A	0.000440814	0.926271	KCNQ5
6	rs3778268	73893197	C	T	0.000433923	0.926705	KCNQ5
6	rs186303922	73925506	A	G	0.000429132	0.927134	...
6	rs947747	73875824	T	C	0.000428682	0.927563	KCNQ5
6	rs78613492	73853625	G	A	0.000426362	0.927989	KCNQ5
6	rs56316751	73923656	T	A	0.000421991	0.928411	...
6	rs10498888	73743718	G	T	0.000419622	0.928831	KCNQ5
6	rs78530451	73838967	T	C	0.000418211	0.929249	KCNQ5
6	rs75251036	73835081	G	A	0.000418065	0.929667	KCNQ5
6	rs16883186	73737589	T	C	0.000417381	0.930084	KCNQ5
6	rs9360621	73655333	G	A	0.000414476	0.930499	KCNQ5
6	rs6935177	73920780	A	T	0.000414369	0.930913	...
6	rs10498887	73740864	A	G	0.000404955	0.931318	KCNQ5
6	rs9446870	73926196	G	A	0.000398109	0.931716	...
6	rs1891405	73743926	C	G	0.000390884	0.932107	KCNQ5
6	rs1815729	73875526	T	G	0.000387089	0.932494	KCNQ5
6	rs74621724	73852699	G	A	0.000379977	0.932874	KCNQ5-KCNQ5-AS1
6	rs2027544	73866702	G	A	0.0003749	0.933249	KCNQ5
6	rs72951099	73867286	A	G	0.000369751	0.933619	KCNQ5
6	rs7739692	73825241	C	G	0.000369569	0.933988	KCNQ5
6	rs111276357	73902998	T	C	0.000365572	0.934354	KCNQ5
6	rs76584804	73826578	C	A	0.000359231	0.934713	KCNQ5
6	rs76535776	73738362	C	T	0.000359093	0.935072	KCNQ5
6	rs75485693	73879295	T	G	0.000353701	0.935426	KCNQ5
6	rs112693001	73875982	T	C	0.000339104	0.935765	KCNQ5
6	rs182275745	73808710	T	G	0.000332218	0.936097	KCNQ5
6	rs72948835	73908986	T	C	0.000323237	0.936421	...
6	rs9342993	73693481	A	G	0.000318837	0.936739	KCNQ5
6	rs45536838	73821013	A	T	0.000318817	0.937058	KCNQ5
6	rs72948836	73910108	G	A	0.000315986	0.937374	...
6	rs7748040	73869229	G	A	0.000308561	0.937683	KCNQ5
6	rs13212697	73923638	A	G	0.000303273	0.937986	...
6	rs9446841	73806635	A	G	0.000300231	0.938286	KCNQ5
6	rs72948831	73907305	A	C	0.000297006	0.938583	KCNQ5
6	rs7748411	73869464	G	A	0.000293964	0.938877	KCNQ5
6	chr6:73661250:D	73661250	AC	A	0.00028565	0.939163	KCNQ5
6	rs6453647	73867937	G	C	0.000284587	0.939448	KCNQ5
6	rs7762949	73868286	T	G	0.00028262	0.93973	KCNQ5
6	rs72953123	73879011	T	C	0.000277158	0.940007	KCNQ5
6	rs10943078	73906746	T	A	0.000275672	0.940283	KCNQ5
6	rs72948839	73910685	C	T	0.000264928	0.940548	...
6	rs9688431	73922654	C	T	0.00024922	0.940797	...
6	chr6:73883510:D	73883510	A	AG	0.000249195	0.941046	KCNQ5
6	rs6453651	73899647	G	A	0.000232564	0.941279	KCNQ5
6	rs16883199	73739831	C	T	0.000224955	0.941504	KCNQ5
6	rs73452859	73809760	A	G	0.000223218	0.941727	KCNQ5
6	rs73452861	73809991	G	A	0.000223002	0.94195	KCNQ5
6	rs1113016	73807127	T	A	0.000221694	0.942172	KCNQ5
6	rs6904597	73807985	A	G	0.000221468	0.942393	KCNQ5
6	rs6927120	73808069	C	T	0.00022142	0.942615	KCNQ5
6	rs11967588	73811777	C	T	0.000220045	0.942835	KCNQ5
6	rs77046031	73809707	G	A	0.000219715	0.943054	KCNQ5
6	rs6453619	73743509	A	C	0.000216344	0.943271	KCNQ5
6	rs6453644	73865196	T	C	0.000216006	0.943487	KCNQ5
6	rs11965567	73812125	A	G	0.000214375	0.943701	KCNQ5
6	rs7743399	73808530	G	A	0.000210547	0.943912	KCNQ5
6	rs60176558	73839746	A	G	0.000210313	0.944122	KCNQ5
6	rs60813738	73839747	A	C	0.000210291	0.944332	KCNQ5
6	rs57535819	73914453	G	A	0.000209537	0.944542	...
6	rs12209053	73915926	G	C	0.000208539	0.94475	...
6	rs112098502	73756491	A	G	0.000208074	0.944958	KCNQ5
6	rs1418414	73814095	T	C	0.000206623	0.945165	KCNQ5
6	chr6:73889428:D	73889428	T	TA	0.000204602	0.94537	KCNQ5
6	rs6453633	73815651	T	C	0.000204069	0.945574	KCNQ5
6	rs1970547	73881323	T	G	0.000203108	0.945777	KCNQ5
6	rs35522191	73905819	G	A	0.000198679	0.945976	KCNQ5
6	rs6907229	73884149	T	C	0.00019826	0.946174	KCNQ5
6	chr6:73878922:I	73878922	C	CT	0.000181143	0.946355	KCNQ5
6	chr6:73660419:D	73660419	G	GA	0.000177102	0.946532	KCNQ5
6	rs16883215	73743070	G	A	0.000175696	0.946708	KCNQ5
6	rs10455270	73907138	C	T	0.000173169	0.946881	KCNQ5
6	chr6:73872960:I	73872960	A	AAAAAAT	0.000165226	0.947046	KCNQ5
6	rs6921182	73742166	T	C	0.000164013	0.94721	KCNQ5
6	rs56144603	73930603	A	G	0.000162733	0.947373	...
6	rs1970549	73883761	A	G	0.000162673	0.947536	KCNQ5
6	rs72942634	73931230	C	A	0.000161356	0.947697	...
6	rs9351980	73885135	A	T	0.000154904	0.947852	KCNQ5
6	rs78798773	73759150	G	A	0.000153304	0.948005	KCNQ5
6	rs72950823	73928286	T	C	0.000152415	0.948158	...
6	rs75672676	73761512	A	C	0.000149097	0.948307	KCNQ5
6	rs72942627	73929881	A	G	0.000147092	0.948454	...
6	rs7759143	73929194	G	A	0.000145551	0.948599	...
6	rs1815727	73876020	A	G	0.000141954	0.948741	KCNQ5
6	rs2882405	73887759	G	A	0.000141193	0.948882	KCNQ5
6	rs9446848	73845299	C	T	0.000140186	0.949023	KCNQ5-KCNQ5-AS1
6	chr6:73832893:D	73832893	T	TTC	0.000135016	0.949158	KCNQ5
6	chr6:73876263:I	73876263	C	CA	0.000129346	0.949287	KCNQ5
6	rs12191533	73926321	A	G	0.000129132	0.949416	...
6	rs10943075	73719982	G	A	0.00012273	0.949539	KCNQ5
6	rs148812685	73765182	G	T	0.000120938	0.94966	KCNQ5
6	rs9446861	73889178	C	T	0.000119954	0.94978	KCNQ5
6	rs114887904	73765875	A	C	0.000119896	0.9499	KCNQ5
6	rs2350751	73925096	G	C	0.000117319	0.950017	...
6	rs901630	98539519	T	C	0.104903	0.104903	...
6	rs113164024	98400689	A	G	0.0199712	0.124874	...
6	rs4458695	98528404	A	G	0.018887	0.143761	...
6	rs7760876	98481755	T	C	0.0174259	0.161187	...
6	rs62422661	98545611	T	G	0.0171282	0.178315	...
6	rs901628	98539377	G	C	0.0163626	0.194677	...
6	rs12176311	98529166	T	C	0.0161819	0.210859	...
6	rs3004179	98513032	A	G	0.0157596	0.226619	...
6	rs76112426	98532427	G	T	0.0157479	0.242367	...
6	rs12663336	98488641	A	C	0.0152637	0.257631	...
6	rs9375104	98487056	C	G	0.0152236	0.272854	...
6	rs13194250	98494218	T	C	0.0149909	0.287845	...
6	rs80147556	98532484	G	A	0.014463	0.302308	...
6	rs9490350	98457356	A	G	0.0144394	0.316747	...
6	rs9401501	98500712	C	T	0.0142358	0.330983	...
6	rs9388046	98491210	A	G	0.0142037	0.345187	...
6	rs9388083	98525726	T	C	0.0138574	0.359044	...
6	rs9398676	98526943	T	C	0.0138158	0.37286	...
6	rs13216075	98522436	G	C	0.0136177	0.386478	...
6	rs901629	98539379	T	C	0.0132303	0.399708	...
6	rs9398662	98489561	C	T	0.0130004	0.412709	...
6	rs7767654	98316008	G	A	0.0124734	0.425182	...
6	rs35062457	98522698	C	T	0.0121654	0.437347	...
6	rs4839938	98507430	T	C	0.0121551	0.449503	...
6	rs9388090	98527087	T	C	0.0120847	0.461587	...
6	rs7772104	98475160	G	A	0.0119925	0.47358	...
6	rs13215227	98506764	C	T	0.0118268	0.485407	...
6	rs4576255	98509656	G	T	0.0118049	0.497212	...
6	rs7742854	98528143	T	C	0.0115214	0.508733	...
6	rs7766486	98528141	C	T	0.0115212	0.520254	...
6	rs4401671	98519911	G	T	0.0110363	0.531291	...
6	rs9401458	98458340	T	C	0.0108723	0.542163	...
6	rs4839939	98507832	C	A	0.010841	0.553004	...
6	rs55731746	98514302	A	G	0.0107139	0.563718	...
6	rs150940933	98532657	T	G	0.010384	0.574102	...
6	rs9401452	98452680	C	T	0.010083	0.584185	...
6	rs9490266	98418637	T	C	0.00907021	0.593255	...
6	rs9372650	98395421	C	A	0.00873223	0.601987	...
6	rs2039722	98314912	G	A	0.00784168	0.609829	...
6	rs4412207	98410756	G	A	0.00752704	0.617356	...
6	rs9375031	98415905	C	T	0.00739081	0.624747	...
6	rs9375023	98403903	T	C	0.00711353	0.63186	...
6	rs7765605	98409668	T	C	0.00685238	0.638713	...
6	rs4240559	98437775	T	C	0.00682968	0.645542	...
6	rs6935884	98416581	A	C	0.00671159	0.652254	...
6	rs4313006	98406939	G	A	0.00670618	0.65896	...
6	rs4339469	98369230	T	G	0.00665463	0.665615	...
6	rs4524616	98445008	C	A	0.00654073	0.672155	...
6	rs4363043	98403022	C	T	0.00648024	0.678636	...
6	rs9490143	98396176	G	A	0.00640395	0.68504	...
6	rs4368816	98439152	T	A	0.00633177	0.691371	...
6	rs7772622	98404346	T	C	0.00608032	0.697452	...
6	rs6569189	98401483	A	C	0.00565968	0.703111	...
6	rs6569192	98402211	G	T	0.00565937	0.708771	...
6	rs9398648	98438566	A	T	0.00565677	0.714428	...
6	rs9375068	98456948	C	T	0.00547022	0.719898	...
6	rs7753937	98396351	A	G	0.00508661	0.724984	...
6	rs6917247	98405337	C	G	0.00494318	0.729928	...
6	rs9482139	98406850	T	C	0.00491019	0.734838	...
6	rs6651004	98401808	T	C	0.0048491	0.739687	...
6	rs6650999	98401847	T	C	0.00484867	0.744535	...
6	rs6900820	98405151	T	A	0.00482836	0.749364	...
6	rs6917037	98405214	C	G	0.00482781	0.754192	...
6	rs4562150	98464961	A	G	0.00482692	0.759019	...
6	rs4412208	98431600	C	T	0.00477229	0.763791	...
6	rs7772327	98404174	T	C	0.00466754	0.768458	...
6	rs7757790	98402394	A	C	0.00450375	0.772962	...
6	rs7761851	98402438	T	C	0.0045035	0.777466	...
6	rs11153969	98358220	T	C	0.00446566	0.781931	...
6	rs9387963	98423208	G	A	0.00408129	0.786013	...
6	rs10872224	98435125	G	T	0.00402909	0.790042	...
6	rs4580876	98322872	A	G	0.00392799	0.79397	...
6	rs9320798	98399407	C	T	0.00390147	0.797871	...
6	rs9387952	98415577	T	G	0.00378066	0.801652	...
6	rs6569187	98400486	T	C	0.0036431	0.805295	...
6	rs28792186	98508087	C	T	0.0036319	0.808927	...
6	rs9387955	98419195	A	G	0.00349815	0.812425	...
6	rs9375075	98464373	A	T	0.00339929	0.815824	...
6	rs9320823	98429337	T	C	0.00334107	0.819165	...
6	rs6905544	98411631	A	G	0.00307659	0.822242	...
6	rs6938973	98421721	T	C	0.0030729	0.825315	...
6	rs35099767	98546547	T	G	0.00303292	0.828348	...
6	rs9490147	98397820	C	T	0.00287048	0.831218	...
6	rs72930796	98331134	A	G	0.00282477	0.834043	...
6	rs1338549	98312143	T	G	0.00272664	0.83677	...
6	rs4839715	98365289	A	G	0.0027117	0.839481	...
6	rs9482094	98364895	A	G	0.0026815	0.842163	...
6	rs11154009	98398832	C	T	0.00248665	0.844649	...
6	rs9385222	98465097	A	G	0.0024722	0.847122	...
6	rs9401305	98331937	C	A	0.00242216	0.849544	...
6	rs9490001	98331133	C	T	0.0023744	0.851918	...
6	rs9482120	98392667	C	A	0.00231393	0.854232	...
6	rs9490000	98331085	G	C	0.00229894	0.856531	...
6	rs4464802	98399612	T	A	0.00229563	0.858827	...
6	rs9320759	98331357	G	A	0.00229362	0.86112	...
6	rs9388017	98463359	G	A	0.00227453	0.863395	...
6	rs7775492	98332930	G	A	0.0022534	0.865648	...
6	rs139504914	98532774	T	C	0.00225321	0.867901	...
6	rs4644071	98399604	T	C	0.00225081	0.870152	...
6	rs4839928	98326012	G	A	0.00214447	0.872297	...
6	rs12205774	98324132	T	C	0.0021131	0.87441	...
6	rs10484868	98332622	T	C	0.00210611	0.876516	...
6	rs6937215	98373765	T	C	0.00209036	0.878606	...
6	rs35121390	98399208	G	C	0.00203023	0.880637	...
6	rs1933721	98313223	G	C	0.00194449	0.882581	...
6	rs9374897	98310571	A	G	0.00194082	0.884522	...
6	rs10484867	98332567	A	G	0.00193687	0.886459	...
6	rs9374896	98310484	T	C	0.00190643	0.888365	...
6	rs4548017	98399521	A	G	0.00186892	0.890234	...
6	rs9401250	98316447	T	C	0.00183639	0.89207	...
6	rs9401278	98324943	A	C	0.00181527	0.893886	...
6	rs9387823	98325000	A	C	0.00181455	0.8957	...
6	rs12189679	98333409	A	G	0.00180781	0.897508	...
6	rs9489980	98325541	G	A	0.00174548	0.899254	...
6	rs4839927	98325884	A	G	0.00170306	0.900957	...
6	rs4839929	98326080	C	G	0.00169781	0.902654	...
6	rs9387845	98328963	A	C	0.00167003	0.904324	...
6	rs12662607	98329264	C	G	0.00166632	0.905991	...
6	rs6906737	98345853	A	T	0.00166207	0.907653	...
6	rs9320747	98310291	G	T	0.00166089	0.909314	...
6	rs7756023	98330225	A	G	0.0016555	0.910969	...
6	rs12662596	98329165	A	G	0.00165541	0.912625	...
6	rs2039719	98326863	A	G	0.00165103	0.914276	...
6	rs9490003	98331316	G	A	0.00164277	0.915918	...
6	rs4142530	98322282	C	T	0.00160564	0.917524	...
6	rs9372625	98344031	A	G	0.00137801	0.918902	...
6	rs9375195	98562720	G	A	0.00123924	0.920141	...
6	rs9372620	98330025	A	G	0.00122323	0.921365	...
6	rs7744474	98330626	T	C	0.00116784	0.922532	...
6	chr6:98449775:D	98449775	T	TATA	0.00114132	0.923674	...
6	chr6:98322714:D	98322714	A	ATATAT	0.000893374	0.924567	...
6	rs9385269	98547979	C	T	0.000829905	0.925397	...
6	chr6:98322953:D	98322953	A	AAG	0.000827622	0.926225	...
6	chr6:98316557:D	98316557	T	TTC	0.000795597	0.92702	...
6	chr6:98316558:D	98316558	T	TC	0.000793011	0.927813	...
6	rs9387948	98408170	A	G	0.000692717	0.928506	...
6	rs9401491	98481904	A	G	0.000690035	0.929196	...
6	chr6:98319163:D	98319163	T	TTTG	0.000689563	0.929886	...
6	chr6:98322954:D	98322954	A	AG	0.000680456	0.930566	...
6	rs1487446	98565212	C	T	0.000672144	0.931238	...
6	rs9401449	98448147	A	T	0.000644674	0.931883	...
6	rs17058141	98470173	C	G	0.000638669	0.932522	...
6	rs4307179	98484453	C	T	0.000626769	0.933148	...
6	rs58369753	98435590	G	T	0.000622983	0.933771	...
6	rs9375085	98472564	C	G	0.00061169	0.934383	...
6	rs12524696	98470643	A	G	0.000611125	0.934994	...
6	rs9375110	98502794	C	A	0.000554618	0.935549	...
6	rs9401416	98430759	G	A	0.000529863	0.936079	...
6	chr6:98314763:D	98314763	A	AT	0.000528152	0.936607	...
6	rs9401450	98450232	T	A	0.000525756	0.937132	...
6	rs9385205	98438038	G	T	0.000518862	0.937651	...
6	rs9375030	98415843	A	C	0.00051545	0.938167	...
6	rs4499937	98493009	T	G	0.000508765	0.938676	...
6	rs62420419	98449723	G	A	0.000507066	0.939183	...
6	rs66772827	98441208	T	C	0.000504354	0.939687	...
6	rs17058139	98469518	C	T	0.000504184	0.940191	...
6	chr6:98535064:D	98535064	C	CT	0.000501239	0.940692	...
6	rs9375028	98413511	A	G	0.000500919	0.941193	...
6	rs9375027	98413502	C	G	0.00050086	0.941694	...
6	chr6:98452818:I	98452818	CAGTT	C	0.000497819	0.942192	...
6	rs4644075	98425740	A	C	0.000496526	0.942689	...
6	rs6916891	98457595	T	G	0.000494161	0.943183	...
6	rs9388073	98516675	G	A	0.000493013	0.943676	...
6	rs62420388	98412917	T	G	0.000490613	0.944166	...
6	rs9401516	98508840	T	A	0.000488851	0.944655	...
6	rs4601135	98425571	A	G	0.000487686	0.945143	...
6	chr6:98326220:D	98326220	G	GC	0.000486711	0.94563	...
6	rs9385223	98466369	G	T	0.000486365	0.946116	...
6	rs62420389	98412949	T	G	0.000482515	0.946598	...
6	rs4636034	98416139	G	A	0.000479006	0.947077	...
6	rs9401406	98420653	G	A	0.000468158	0.947546	...
6	rs62420418	98423765	A	C	0.000467869	0.948013	...
6	rs9387964	98423507	C	T	0.000466711	0.94848	...
6	rs9398636	98422743	C	T	0.000462494	0.948943	...
6	rs17058157	98490015	A	G	0.000461596	0.949404	...
6	rs9387968	98425218	G	C	0.000461013	0.949865	...
6	rs6912235	98421767	T	C	0.000455984	0.950321	...
6	rs6569648	130349119	C	T	0.590638	0.590638	L3MBTL3
6	rs7754426	130331265	A	G	0.0357862	0.626424	...
6	rs9388766	130354855	T	C	0.0305855	0.657009	L3MBTL3
6	rs7740107	130374461	T	A	0.0238326	0.680842	L3MBTL3
6	rs9483083	130416949	A	C	0.012006	0.692848	L3MBTL3
6	rs7756870	130373648	C	G	0.00770275	0.700551	L3MBTL3
6	rs1415700	130345791	G	A	0.00723574	0.707786	L3MBTL3
6	rs7740188	130346105	G	A	0.00709841	0.714885	L3MBTL3
6	rs7744830	130367725	T	G	0.0069157	0.7218	L3MBTL3
6	rs6569646	130336553	T	C	0.0064915	0.728292	...
6	rs6569644	130322357	C	T	0.00642791	0.73472	...
6	rs7451021	130381246	T	C	0.00557558	0.740295	L3MBTL3
6	rs6926186	130350294	G	A	0.0054811	0.745777	L3MBTL3
6	rs9492443	130398731	T	C	0.00527855	0.751055	L3MBTL3
6	rs12661188	130378833	T	C	0.00509763	0.756153	L3MBTL3
6	rs945890	130321899	A	T	0.0049086	0.761061	...
6	rs9388762	130324570	A	T	0.00486468	0.765926	...
6	rs878614	130169663	G	C	0.00445152	0.770378	TMEM244
6	rs9402211	130353612	T	C	0.00409228	0.77447	L3MBTL3
6	rs9375694	130356608	G	A	0.00381709	0.778287	L3MBTL3
6	rs6899976	130358428	G	A	0.00380647	0.782093	L3MBTL3
6	rs9388767	130357553	G	A	0.00331373	0.785407	L3MBTL3
6	rs6904762	130328639	G	A	0.00319408	0.788601	...
6	rs9375695	130358944	G	T	0.00311546	0.791717	L3MBTL3
6	rs6900473	130375810	A	G	0.00301712	0.794734	L3MBTL3
6	rs6914670	130372984	A	G	0.00292562	0.797659	L3MBTL3
6	rs1337776	130334409	A	G	0.00259741	0.800257	...
6	rs11759018	130377843	C	T	0.00236491	0.802622	L3MBTL3
6	rs11752200	130377847	T	C	0.00236411	0.804986	L3MBTL3
6	rs9375702	130384187	C	T	0.00219034	0.807176	L3MBTL3
6	rs7760760	130379852	A	G	0.00218343	0.80936	L3MBTL3
6	rs9375700	130379854	T	C	0.00218297	0.811543	L3MBTL3
6	rs4364506	130389940	A	G	0.0019538	0.813496	L3MBTL3
6	rs7763108	130367793	G	T	0.00167548	0.815172	L3MBTL3
6	rs4594967	130366161	A	G	0.00141914	0.816591	L3MBTL3
6	rs4551191	130366218	C	G	0.00141574	0.818007	L3MBTL3
6	rs4339481	130382653	A	T	0.00136118	0.819368	L3MBTL3
6	rs9402213	130373188	A	G	0.00135527	0.820723	L3MBTL3
6	rs4373379	130374569	G	A	0.00133259	0.822056	L3MBTL3
6	rs9388768	130374102	C	A	0.00131713	0.823373	L3MBTL3
6	rs9372954	130373529	T	C	0.00131618	0.824689	L3MBTL3
6	rs9375699	130373214	A	G	0.00131411	0.826003	L3MBTL3
6	rs9375701	130384057	C	T	0.00128955	0.827293	L3MBTL3
6	rs4279458	130369871	T	C	0.00128795	0.828581	L3MBTL3
6	rs4321845	130369983	C	T	0.00128567	0.829866	L3MBTL3
6	rs4404788	130369323	G	A	0.00128397	0.83115	L3MBTL3
6	rs9375698	130368602	A	G	0.00127946	0.83243	L3MBTL3
6	rs9385532	130371227	T	C	0.00127532	0.833705	L3MBTL3
6	rs6923819	130376095	T	C	0.00124786	0.834953	L3MBTL3
6	rs9388770	130380877	A	T	0.00122062	0.836174	L3MBTL3
6	rs4548027	130397515	A	G	0.00121264	0.837386	L3MBTL3
6	rs9388769	130379954	G	A	0.00121041	0.838597	L3MBTL3
6	rs9492447	130403515	C	G	0.00118735	0.839784	L3MBTL3
6	rs7746589	130371840	G	A	0.00117163	0.840956	L3MBTL3
6	rs9492445	130401625	A	G	0.00114681	0.842102	L3MBTL3
6	rs9375703	130386971	T	G	0.00113676	0.843239	L3MBTL3
6	rs7761063	130379973	A	C	0.00112753	0.844367	L3MBTL3
6	rs10499172	130390657	C	G	0.00112049	0.845487	L3MBTL3
6	rs12206651	130422142	G	A	0.00109833	0.846586	L3MBTL3
6	rs9492440	130390379	C	T	0.00107119	0.847657	L3MBTL3
6	rs7764762	130396498	A	G	0.00107009	0.848727	L3MBTL3
6	rs9483082	130415684	A	C	0.00106742	0.849794	L3MBTL3
6	rs7759381	130391887	A	G	0.00106248	0.850857	L3MBTL3
6	rs9483079	130401268	T	A	0.00105237	0.851909	L3MBTL3
6	rs7762724	130402676	G	A	0.00105152	0.852961	L3MBTL3
6	rs13209890	130396545	G	T	0.00100998	0.853971	L3MBTL3
6	rs4351283	130374711	T	C	0.000972161	0.854943	L3MBTL3
6	rs9492451	130415124	T	C	0.000965624	0.855908	L3MBTL3
6	rs12190724	130395960	G	C	0.000959745	0.856868	L3MBTL3
6	rs10872348	130170928	G	A	0.000959706	0.857828	TMEM244
6	chr6:130562999:I	130562999	GA	G	0.000953424	0.858781	SAMD3
6	rs9385533	130373313	T	C	0.000892021	0.859673	L3MBTL3
6	rs12198331	130400092	T	C	0.000816378	0.86049	L3MBTL3
6	rs9492446	130402289	T	C	0.000815303	0.861305	L3MBTL3
6	rs7769599	130393782	G	A	0.000812623	0.862118	L3MBTL3
6	rs9321190	130164764	G	A	0.000808219	0.862926	TMEM244
6	rs9483085	130420941	T	C	0.000807759	0.863734	L3MBTL3
6	rs9321204	130311831	A	G	0.000790344	0.864524	...
6	rs9492441	130393148	T	C	0.000776233	0.8653	L3MBTL3
6	rs9402214	130387773	T	C	0.00071982	0.86602	L3MBTL3
6	rs4458710	130161883	G	A	0.000607642	0.866628	TMEM244
6	rs9492400	130168949	T	C	0.000598986	0.867227	TMEM244
6	rs880699	130170533	A	G	0.000579225	0.867806	TMEM244
6	rs878613	130169545	A	C	0.000531927	0.868338	TMEM244
6	rs6919255	130164189	T	C	0.000511913	0.86885	TMEM244
6	rs6933511	130456938	A	C	0.000509373	0.869359	L3MBTL3
6	rs6903210	130165310	G	A	0.000468921	0.869828	TMEM244
6	rs4624895	130151533	A	C	0.000456698	0.870285	...
6	rs11154521	130434142	C	G	0.000448102	0.870733	L3MBTL3
6	rs4629709	130154686	A	G	0.00044367	0.871176	TMEM244
6	rs7755589	130419555	A	G	0.000437883	0.871614	L3MBTL3
6	rs12201492	130379282	A	G	0.000422381	0.872037	L3MBTL3
6	rs1480516	130177055	T	C	0.00039144	0.872428	TMEM244
6	rs9321208	130433290	A	G	0.000389285	0.872817	L3MBTL3
6	rs4897361	130364328	G	T	0.000380231	0.873198	L3MBTL3
6	rs13211683	130417833	C	G	0.000372318	0.87357	L3MBTL3
6	rs2046083	130153686	T	A	0.000359577	0.87393	TMEM244
6	rs7758886	130331668	A	G	0.000348841	0.874278	...
6	rs9388764	130326712	C	T	0.000338474	0.874617	...
6	rs9321212	130455899	C	G	0.000318421	0.874935	L3MBTL3
6	rs6928313	130368508	C	T	0.000317427	0.875253	L3MBTL3
6	rs9492452	130417294	T	C	0.000310014	0.875563	L3MBTL3
6	rs9372952	130329498	T	C	0.000307211	0.87587	...
6	rs1932101	130459410	G	C	0.000306142	0.876176	L3MBTL3
6	rs208869	130062717	C	T	0.000304652	0.876481	...
6	rs140231339	130160569	C	T	0.000299319	0.87678	TMEM244
6	rs9321211	130444316	C	T	0.000295037	0.877075	L3MBTL3
6	rs9492454	130422098	C	T	0.000290497	0.877366	L3MBTL3
6	rs9492459	130452430	G	A	0.000288968	0.877655	L3MBTL3
6	rs9483090	130456455	A	C	0.000282156	0.877937	L3MBTL3
6	rs6916939	130147894	C	G	0.000278646	0.878215	...
6	rs11154519	130362577	G	A	0.000278363	0.878494	L3MBTL3
6	rs9483089	130450673	T	C	0.000273359	0.878767	L3MBTL3
6	rs9372951	130329193	A	C	0.000262609	0.87903	...
6	rs9492460	130452717	T	C	0.000258102	0.879288	L3MBTL3
6	rs12207878	130458108	G	A	0.000250397	0.879538	L3MBTL3
6	rs6569645	130328552	G	A	0.000238457	0.879777	...
6	rs138296262	130157681	A	G	0.000216761	0.879993	TMEM244
6	rs4895863	130326680	T	C	0.000215948	0.880209	...
6	rs9321210	130442509	G	A	0.000212819	0.880422	L3MBTL3
6	rs9388763	130326670	G	A	0.000212044	0.880634	...
6	rs9385531	130327056	G	A	0.000209929	0.880844	...
6	rs4895865	130364491	A	T	0.00020338	0.881047	L3MBTL3
6	rs9375697	130365128	C	T	0.000202635	0.88125	L3MBTL3
6	rs7747276	130312067	A	G	0.000201656	0.881452	...
6	rs6569651	130404081	C	T	0.000199531	0.881651	L3MBTL3
6	rs9398934	130365016	A	G	0.000198285	0.88185	L3MBTL3
6	rs9398935	130365195	G	A	0.00019664	0.882046	L3MBTL3
6	rs12529377	129932107	C	T	0.000194758	0.882241	ARHGAP18
6	rs12206570	130385104	T	G	0.000191108	0.882432	L3MBTL3
6	rs4895864	130364482	C	T	0.000188632	0.882621	L3MBTL3
6	chr6:130370731:D	130370731	TTG	T	0.000176975	0.882798	L3MBTL3
6	rs140420969	130159956	G	A	0.00017471	0.882972	TMEM244
6	rs4419687	130367539	C	T	0.000173813	0.883146	L3MBTL3
6	rs1480515	130176592	T	G	0.000172453	0.883319	TMEM244
6	rs4323324	130382896	G	A	0.000169816	0.883488	L3MBTL3
6	rs59084494	130358044	G	A	0.000169747	0.883658	L3MBTL3
6	rs12197047	130389211	G	A	0.000167264	0.883826	L3MBTL3
6	rs9385502	129918743	T	C	0.000165726	0.883991	ARHGAP18
6	rs9375696	130359711	C	T	0.000163612	0.884155	L3MBTL3
6	rs9385501	129910822	C	T	0.000163353	0.884318	ARHGAP18
6	rs9375636	129928552	G	C	0.000160636	0.884479	ARHGAP18
6	rs9492391	130153140	C	G	0.000160047	0.884639	TMEM244
6	rs72989401	130384710	T	A	0.000158881	0.884798	L3MBTL3
6	rs35285309	130157002	T	C	0.000157519	0.884955	TMEM244
6	rs3890746	130371055	C	T	0.000157186	0.885112	L3MBTL3
6	rs4418204	130157034	A	G	0.000156746	0.885269	TMEM244
6	rs9398937	130375544	A	G	0.000154484	0.885424	L3MBTL3
6	rs7755652	130369757	T	G	0.000145855	0.88557	L3MBTL3
6	rs12216022	130178693	G	T	0.000144781	0.885714	TMEM244
6	rs11154518	130313733	G	A	0.000142972	0.885857	...
6	rs7756339	130414235	G	A	0.000140975	0.885998	L3MBTL3
6	rs13208867	130384534	G	A	0.000137648	0.886136	L3MBTL3
6	rs1125970	130456584	T	A	0.000136656	0.886273	L3MBTL3
6	rs7774174	130405020	G	A	0.000135385	0.886408	L3MBTL3
6	rs13203568	130777251	C	G	0.000134881	0.886543	...
6	rs12197171	130447437	G	A	0.000133174	0.886676	L3MBTL3
6	rs9321189	130163036	C	T	0.000127715	0.886804	TMEM244
6	rs9321205	130314041	T	G	0.000126061	0.88693	...
6	rs12193739	129925978	T	C	0.000120448	0.88705	ARHGAP18
6	rs3829756	129926802	C	T	0.00011731	0.887168	ARHGAP18
6	rs4441964	130157096	C	A	0.0001168	0.887284	TMEM244
6	chr6:130389707:D	130389707	T	TA	0.00011549	0.8874	L3MBTL3
6	rs61140488	129909129	T	C	0.000114959	0.887515	ARHGAP18
6	rs9372940	129918866	G	A	0.000113121	0.887628	ARHGAP18
6	rs9388772	130429016	A	G	0.000112427	0.88774	L3MBTL3
6	rs4897360	130317290	C	T	0.000112393	0.887853	...
6	rs138499165	130097752	A	G	0.000111018	0.887964	...
6	rs4895853	129918927	G	A	0.000110164	0.888074	ARHGAP18
6	rs9388714	129924109	C	T	0.000110159	0.888184	ARHGAP18
6	rs12196260	130179000	T	C	0.000109601	0.888294	TMEM244
6	rs13203469	130328399	C	A	0.000106316	0.8884	...
6	rs35426009	129924406	C	G	0.000105387	0.888505	ARHGAP18
6	rs1415701	130345835	A	G	0.00010468	0.88861	L3MBTL3
6	rs9388732	130081273	C	A	0.000104628	0.888715	...
6	rs6569643	130312646	G	A	0.000103876	0.888819	...
6	rs17057622	130014988	C	A	0.000102352	0.888921	ARHGAP18
6	rs9492442	130396651	A	G	0.000101927	0.889023	L3MBTL3
6	rs6914419	130436472	T	C	0.000101764	0.889125	L3MBTL3
6	rs6902109	130316559	A	G	0.000101538	0.889226	...
6	rs1112847	130335109	C	T	0.000100436	0.889327	...
6	chr6:129981131:I	129981131	TG	T	9.76997e-05	0.889424	ARHGAP18
6	chr6:130352025:I	130352025	T	TA	9.7129e-05	0.889521	L3MBTL3
6	chr6:130460244:D	130460244	CT	C	9.12261e-05	0.889613	L3MBTL3
6	rs9492597	130775040	A	C	9.05255e-05	0.889703	...
6	rs1337775	130334365	A	G	8.89711e-05	0.889792	...
6	rs12661232	130379160	C	T	8.72194e-05	0.889879	L3MBTL3
6	chr6:129903343:D	129903343	A	AAAC	8.58899e-05	0.889965	ARHGAP18
6	rs2876067	130325696	C	A	8.40036e-05	0.890049	...
6	rs145992730	130376794	T	C	8.38214e-05	0.890133	L3MBTL3
6	chr6:130338721:I	130338721	A	AAAAT	8.33436e-05	0.890216	...
6	rs9398931	130313515	G	A	8.31835e-05	0.8903	...
6	rs10499162	129919010	C	T	8.1887e-05	0.890381	ARHGAP18
6	rs189498308	129946506	A	G	7.95373e-05	0.890461	ARHGAP18
6	chr6:130328249:I	130328249	A	AAG	7.91276e-05	0.89054	...
6	rs11154522	130441464	A	G	7.89055e-05	0.890619	L3MBTL3
6	chr6:130325455:I	130325455	A	ACTGT	7.87472e-05	0.890698	...
6	rs9385523	130168168	T	A	7.83993e-05	0.890776	TMEM244
6	rs9321207	130397238	A	G	7.61239e-05	0.890852	L3MBTL3
6	rs6569654	130410069	T	C	7.40543e-05	0.890926	L3MBTL3
6	chr6:130443921:D	130443921	T	TCTA	7.40404e-05	0.891	L3MBTL3
6	rs9492403	130178019	A	G	7.38824e-05	0.891074	TMEM244
6	rs1544144	130320223	T	C	7.36428e-05	0.891148	...
6	rs67054032	130169835	T	C	7.36153e-05	0.891222	TMEM244
6	rs9483066	130166774	C	T	7.18747e-05	0.891293	TMEM244
6	chr6:130368251:I	130368251	AT	A	6.98142e-05	0.891363	L3MBTL3
6	rs7452389	130161393	T	C	6.87513e-05	0.891432	TMEM244
6	rs9398921	130072579	G	C	6.81572e-05	0.8915	...
6	rs9388761	130316646	C	T	6.76734e-05	0.891568	...
6	rs9398939	130402228	T	A	6.7414e-05	0.891635	L3MBTL3
6	rs13204622	130170532	T	C	6.60545e-05	0.891701	TMEM244
6	rs6915308	130312913	G	A	6.59646e-05	0.891767	...
6	rs9388729	130071823	T	C	6.16944e-05	0.891829	...
6	rs2039681	130302682	T	C	6.15363e-05	0.891891	...
6	rs208872	130084368	C	A	6.11794e-05	0.891952	...
6	rs9483065	130166699	A	G	5.96563e-05	0.892011	TMEM244
6	chr6:130370404:I	130370404	C	CCT	5.91133e-05	0.89207	L3MBTL3
6	rs9492401	130172591	C	T	5.80041e-05	0.892128	TMEM244
6	rs9402208	130316488	T	C	5.70842e-05	0.892186	...
6	rs6569650	130403816	A	G	5.70692e-05	0.892243	L3MBTL3
6	rs9402144	129919523	T	C	5.61635e-05	0.892299	ARHGAP18
6	rs113750608	130200888	C	G	5.60188e-05	0.892355	...
6	rs12194709	130449280	G	T	5.56733e-05	0.89241	L3MBTL3
6	rs7753901	130242858	G	A	5.551e-05	0.892466	...
6	rs4897366	130458078	C	A	5.46345e-05	0.892521	L3MBTL3
6	rs1572572	130214112	G	A	5.37585e-05	0.892574	...
6	rs9492469	130490178	A	G	5.37087e-05	0.892628	SAMD3
6	rs34992658	130329540	G	A	5.30672e-05	0.892681	...
6	rs13207500	130447089	C	T	5.29375e-05	0.892734	L3MBTL3
6	rs145187377	130472136	T	C	5.23512e-05	0.892786	SAMD3
6	rs17057862	130089829	G	T	5.2331e-05	0.892839	...
6	rs7738862	130322744	G	A	5.2119e-05	0.892891	...
6	rs4897364	130394666	C	G	5.15286e-05	0.892942	L3MBTL3
6	rs72980660	129905648	A	T	5.14481e-05	0.892994	ARHGAP18
6	chr6:130460246:D	130460246	TA	T	5.1235e-05	0.893045	L3MBTL3
6	rs6901414	130441315	A	G	5.11833e-05	0.893096	L3MBTL3
6	rs72987384	130349515	C	A	4.92509e-05	0.893146	L3MBTL3
6	rs9321188	130162945	T	C	4.90695e-05	0.893195	TMEM244
6	rs6918417	130142627	G	C	4.90379e-05	0.893244	...
6	rs1889626	130450395	A	T	4.89967e-05	0.893293	L3MBTL3
6	chr6:130483653:I	130483653	T	TA	4.89509e-05	0.893342	SAMD3
6	rs9388753	130256346	C	G	4.87368e-05	0.89339	...
6	rs2039682	130241909	A	G	4.86132e-05	0.893439	...
6	rs113898003	130341235	C	T	4.85778e-05	0.893488	L3MBTL3
6	rs72993008	130445031	A	G	4.85647e-05	0.893536	L3MBTL3
6	rs75457925	130009274	G	A	4.84761e-05	0.893585	ARHGAP18
6	rs17382437	130009146	G	C	4.84518e-05	0.893633	ARHGAP18
6	rs9402145	129920784	G	A	4.8132e-05	0.893681	ARHGAP18
6	rs9402216	130432420	G	A	4.8102e-05	0.893729	L3MBTL3
6	rs7756733	130398013	T	A	4.79165e-05	0.893777	L3MBTL3
6	rs9483071	130174071	A	G	4.68918e-05	0.893824	TMEM244
6	rs112847302	130183380	T	C	4.67961e-05	0.893871	...
6	rs10484284	130063709	C	T	4.65259e-05	0.893917	...
6	rs10485400	130444124	C	T	4.64546e-05	0.893964	L3MBTL3
6	rs12202120	130057150	G	T	4.63286e-05	0.89401	...
6	rs9321195	130175904	C	T	4.63145e-05	0.894056	TMEM244
6	chr6:130386212:D	130386212	GGAGA	G	4.63114e-05	0.894103	L3MBTL3
6	rs7767265	130263566	G	A	4.63021e-05	0.894149	...
6	rs7767548	130312248	T	A	4.61903e-05	0.894195	...
6	rs76356039	130127913	G	A	4.61861e-05	0.894241	...
6	rs9321192	130167026	C	G	4.56161e-05	0.894287	TMEM244
6	rs6900956	130440798	G	A	4.53982e-05	0.894332	L3MBTL3
6	rs7756546	130502114	C	T	4.53802e-05	0.894378	SAMD3
6	rs9492361	130042066	A	T	4.52891e-05	0.894423	...
6	rs9492475	130499487	T	C	4.45786e-05	0.894468	SAMD3
[truncated: 4,879 more rows]
