# Supplementary material
Source: publisher figshare collection journal article supplement (https://gsajournals.figshare.com/articles/dataset/_/6957152)
Supplement: Supplementary file 1 [file 1]

## Supplemental material for “A large multi-ethnic genome-wide association study of body mass index identifies novel loci”

Thomas J Hoffmann<sup>1,2</sup>, Helene Choquet<sup>3</sup>, Jie Yin<sup>3</sup>, Yambazi Banda<sup>1</sup>, Mark N Kvale<sup>1</sup>, Maria Glymour<sup>2</sup>, Cathy Schaefer<sup>3</sup>, Neil Risch<sup>1,2,3</sup>, and Eric Jorgenson<sup>3</sup>

<sup>1</sup>Institute for Human Genetics, University of California San Francisco, San Francisco, CA, 94143 USA

<sup>2</sup>Department of Epidemiology and Biostatistics, University of California San Francisco, San Francisco, CA 94158, USA

<sup>3</sup>Division of Research, Kaiser Permanente, Northern California, Oakland, CA 94612, USA

### List of Tables

|    |                                                                       |    |
|----|-----------------------------------------------------------------------|----|
| 1  | Ancestry association. . . . .                                         | 2  |
| 2  | BMI by ethnicity/nationality for GERA. . . . .                        | 3  |
| 3  | Extended novel GERA results and the replication in GIANT. . . . .     | 4  |
| 4  | Previously known BMI loci . . . . .                                   | 5  |
| 5  | SNPs GWAS significant in the meta-analysis of GERA and GIANT. . . . . | 23 |
| 6  | Conditional SNPs . . . . .                                            | 28 |
| 7  | Sex heterogeneity tests . . . . .                                     | 29 |
| 8  | Age heterogeneity tests . . . . .                                     | 34 |
| 10 | BMI-associated variants annotation. . . . .                           | 39 |
| 11 | BMI x age pairwise heritability interactions. . . . .                 | 42 |

### List of Figures

|    |                                                                          |    |
|----|--------------------------------------------------------------------------|----|
| 1  | Age- and sex-adjusted BMI distribution in GERA ethnicity groups. . . . . | 43 |
| 2  | BMI Manhattan and Q-Q plots . . . . .                                    | 50 |
| 3  | Locus plots. . . . .                                                     | 51 |
| 4  | GIANT Manhattan imputed SNPs. . . . .                                    | 52 |
| 5  | Effect size comparisons amongst GERA, GIANT, and UKB. . . . .            | 53 |
| 6  | Dominance Q-Q plot . . . . .                                             | 54 |
| 7  | Epistasis Q-Q plot . . . . .                                             | 55 |
| 8  | Sex effect size differences . . . . .                                    | 56 |
| 9  | Sex effect size differences Q-Q plot. . . . .                            | 57 |
| 10 | Age differences Q-Q plot. . . . .                                        | 58 |

**Table S1. Ancestry association.** Regression coefficients include the interpretable ancestry PCs to shed the ancestry effects in the dataset, which were divided by their standard deviation (i.e., Z-score). See Banda 2015 et al. for the PCs and ancestry interpretation of the PCs.

(a) Non-Hispanic whites, using all individuals.

|             | Eff     | P       |
|-------------|---------|---------|
| Age         | 0.38    | 10e-509 |
| Age squared | -0.0033 | 10e-634 |
| Female      | -0.68   | 10e-76  |
| PC1         | 0.31    | 10e-72  |
| PC2         | -0.28   | 10e-45  |

(b) Non-Hispanic whites, with Ashkenazi's removed, and with an Ashkenazi ancestry covariate. PC<sub>1</sub> represents the Southeast (negative PC<sub>1</sub>) to North European (positive PC<sub>1</sub>) ancestry cline, PC<sub>2</sub> Southwest (negative) to Northeast (positive) European.

|             | Eff     | P       |
|-------------|---------|---------|
| Age         | 0.38    | 10e-510 |
| Age squared | -0.0033 | 10e-635 |
| Female      | -0.69   | 10e-76  |
| PC1         | -0.17   | 7.7e-11 |
| PC2         | -0.12   | 4.5e-10 |
| ASHK        | -1.7    | 10e-45  |
| PC1:PC2     | 0.09    | 0.00031 |

(c) Latinos. PC<sub>1</sub> is Native American (negative PC<sub>1</sub>) to European (positive PC<sub>1</sub>) ancestry, PC<sub>2</sub> African (negative PC<sub>2</sub>) to European (positive PC<sub>2</sub>).

|                             | Eff    | P       |
|-----------------------------|--------|---------|
| Age                         | 0.32   | 10e-29  |
| Age squared                 | -0.003 | 10e-33  |
| Female                      | -0.37  | 0.0045  |
| PC1                         | -0.36  | 3.2e-06 |
| PC2                         | 0.023  | 0.76    |
| Central South America       | -1.3   | 1.4e-07 |
| Mexican                     | 0.047  | 0.77    |
| Puerto Rican                | 0.56   | 0.25    |
| Cuban                       | 0.68   | 0.47    |
| Latino and African American | 0.61   | 0.28    |

(d) East Asian. PC<sub>1</sub> amount of European ancestry (negative PC<sub>1</sub>) vs. Asian (positive PC<sub>1</sub>), PC<sub>2</sub> is Southern (negative PC<sub>2</sub>) to Northern (positive PC<sub>2</sub>) East Asian ancestry.

|                    | Eff     | P       |
|--------------------|---------|---------|
| Age                | 0.24    | 10e-46  |
| Age squared        | -0.0022 | 10e-50  |
| Female             | -1.6    | 10e-58  |
| EaPC1              | -1.2    | 10e-67  |
| EaPC2              | -0.36   | 5.2e-11 |
| EaPC2 <sup>2</sup> | 0.57    | 10e-35  |
| EaPC1 × EaPC2      | 0.42    | 0.00038 |

(e) African American. PC<sub>1</sub> is European (negative PC<sub>1</sub>) to African (positive PC<sub>1</sub>), PC<sub>2</sub> amount of East Asian (positive PC<sub>1</sub>) ancestry.

|             | Eff     | P       |
|-------------|---------|---------|
| Age         | 0.48    | 10e-36  |
| Age squared | -0.0044 | 10e-43  |
| Female      | 1.6     | 3.8e-14 |
| AfPC1       | 0.63    | 2.7e-09 |
| AfPC2       | -0.079  | 0.34    |

(f) South Asian.

|             | Eff     | P      |
|-------------|---------|--------|
| Age         | 0.39    | 0.0071 |
| Age squared | -0.0029 | 0.0059 |
| Female      | -0.053  | 0.92   |
| PC1         | -0.52   | 0.0067 |
| PC2         | 0.19    | 0.25   |

**Table S2. BMI by ethnicity/nationality for GERA.** Mean and 95% confidence intervals are given for raw BMI values and for age and sex-adjusted BMI residuals.

| Group                            | N     | BMI               | Age and Sex-adjusted BMI |
|----------------------------------|-------|-------------------|--------------------------|
| Non-Hispanic whites              | 81377 | 27.6 (27.6, 27.7) | -0.12 (-0.16, -0.08)     |
| - Excluding Ashkenazi            | 76143 | 27.7 (27.7, 27.7) | -0.04 (-0.08, 0.00)      |
| - Ashkenazi $\geq 50\%$          | 5194  | 26.5 (26.4, 26.7) | -1.28 (-1.42, -1.15)     |
| - Ashkenazi 100%                 | 3643  | 26.4 (26.2, 26.5) | -1.45 (-1.60, -1.30)     |
| - Ashkenazi 75%                  | 119   | 26.5 (25.6, 27.4) | -1.29 (-2.23, -0.35)     |
| - Ashkenazi 50%                  | 1432  | 26.9 (26.6, 27.2) | -0.86 (-1.14, -0.57)     |
| Latino                           | 8322  | 28.8 (28.8, 28.8) | 1.08 (0.95, 1.20)        |
| - Central South America          | 612   | 27.8 (27.4, 28.2) | 0.08 (-0.32, 0.47)       |
| - Cuba                           | 40    | 28.4 (26.7, 30.1) | 0.56 (-1.13, 2.25)       |
| - Mexican                        | 3048  | 29.2 (29.0, 29.4) | 1.40 (1.20, 1.60)        |
| - Puerto Rican                   | 148   | 29.1 (28.2, 30.0) | 1.36 (0.47, 2.24)        |
| - Latino + African American      | 112   | 29.6 (28.5, 30.7) | 0.19 (-8.22, 8.61)       |
| East Asians without Indo-Fijians | 7235  | 25.2 (25.1, 25.3) | -2.57 (-2.67, -2.48)     |
| - Chinese                        | 2892  | 24.2 (24.1, 24.3) | -3.59 (-3.72, -3.46)     |
| - Filipino                       | 1259  | 26.3 (26.1, 26.5) | -1.46 (-1.69, -1.23)     |
| - Japanese                       | 1363  | 25.3 (25.1, 25.5) | -2.46 (-2.69, -2.24)     |
| - Korean                         | 174   | 24.0 (23.5, 24.6) | -3.51 (-4.04, -2.98)     |
| African Americans                | 3069  | 30.2 (30.0, 30.4) | 2.41 (2.18, 2.63)        |
| South Asians                     | 459   | 25.6 (25.2, 26.0) | -2.27 (-2.62, -1.92)     |

**Table S3. Extended novel GERA results and the replication in GIANT.** Chr, chromosome; Pos, Position; Allele, coded effect allele/other allele; Info, Impute2 imputation  $r^2$ quality; Frq, frequency of effect allele; Eff, effect size.

| SNP             | Chr | Pos       | Allele | Group                   | Info | Frq  | Eff   | P       | I <sup>2</sup> | hetp   |
|-----------------|-----|-----------|--------|-------------------------|------|------|-------|---------|----------------|--------|
| rs144839874     | 2   | 194880111 | A/G    | GERA Non-Hispanic white | .67  | .013 | -.140 | 4.3e-8  |                |        |
|                 |     |           |        | GERA Latino             | .72  | .007 | -.136 | .23     |                |        |
|                 |     |           |        | GERA East Asian         | .53  | .001 | .338  | .48     |                |        |
|                 |     |           |        | GERA African American   | .3   | .003 |       |         |                |        |
|                 |     |           |        | GERA South Asian        | .82  | .010 | .212  | .56     |                |        |
|                 |     |           |        | GERA Meta               |      |      | -.139 | 2e-8    | .00            | .97    |
|                 |     |           |        | GIANT                   | .26  | .987 |       |         |                |        |
|                 |     |           |        | UKB Non-Hispanic white  | .82  | .006 |       |         |                |        |
|                 |     |           |        | UKB Mixed/Other         | .64  | .003 |       |         |                |        |
|                 |     |           |        | UKB South Asian         | .63  | .003 |       |         |                |        |
|                 |     |           |        | UKB East Asian          | .028 | .000 |       |         |                |        |
|                 |     |           |        | UKB African American    | .74  | .002 |       |         |                |        |
|                 |     |           |        | GIANT+UKB Meta          |      |      | -.004 | .82     | 1              |        |
|                 |     |           |        | GERA+GIANT+UKB Meta     |      |      | -.042 | .0017   | 77.88          | .0004  |
| chr3:77646862:D | 3   | 77646862  | TG/T   | GERA Non-Hispanic white | .98  | .599 | -.025 | 3.2e-7  |                |        |
|                 |     |           |        | GERA Latino             | .96  | .588 | -.027 | .099    |                |        |
|                 |     |           |        | GERA East Asian         | .95  | .619 | -.037 | .026    |                |        |
|                 |     |           |        | GERA African American   | .95  | .671 | -.016 | .58     |                |        |
|                 |     |           |        | GERA South Asian        | .96  | .617 | -.082 | .21     |                |        |
|                 |     |           |        | GERA Meta               |      |      | -.026 | 4.7e-9  | .00            | .85    |
|                 |     |           |        | GIANT                   | .99  | .401 | -.011 | .0022   |                |        |
|                 |     |           |        | UKB Non-Hispanic white  | .92  | .593 | -.012 | 1e-7    |                |        |
|                 |     |           |        | UKB Mixed/Other         | .9   | .643 | -.002 | .89     |                |        |
|                 |     |           |        | UKB South Asian         | .82  | .624 | -.026 | .12     |                |        |
|                 |     |           |        | UKB East Asian          | .84  | .665 | .061  | .12     |                |        |
|                 |     |           |        | UKB African American    | .85  | .706 | -.027 | .15     |                |        |
|                 |     |           |        | GIANT+UKB Meta          |      |      | -.012 | 3.6e-10 | 4.74           | .39    |
|                 |     |           |        | GERA+GIANT+UKB Meta     |      |      | -.014 | 6.7e-16 | 33.41          | .13    |
| rs828758        | 5   | 162351852 | G/A    | GERA Non-Hispanic white | .99  | .435 | .023  | 1.4e-6  |                |        |
|                 |     |           |        | GERA Latino             | .99  | .482 | .036  | .02     |                |        |
|                 |     |           |        | GERA East Asian         | .99  | .450 | .007  | .68     |                |        |
|                 |     |           |        | GERA African American   | .98  | .378 | .073  | .0056   |                |        |
|                 |     |           |        | GERA South Asian        | .98  | .415 | -.101 | .12     |                |        |
|                 |     |           |        | GERA Meta               |      |      | .024  | 4.4e-8  | 55.05          | .064   |
|                 |     |           |        | GIANT                   | .98  | .565 | .006  | .12     |                |        |
|                 |     |           |        | UKB Non-Hispanic white  | 1    | .449 | .005  | .018    |                |        |
|                 |     |           |        | UKB Mixed/Other         | 1    | .415 | -.012 | .46     |                |        |
|                 |     |           |        | UKB South Asian         | 1    | .425 | -.003 | .85     |                |        |
|                 |     |           |        | UKB East Asian          | .97  | .476 | -.061 | .071    |                |        |
|                 |     |           |        | UKB African American    | .96  | .367 | .006  | .73     |                |        |
|                 |     |           |        | GIANT+UKB Meta          |      |      | .005  | .01     | 3.17           | .4     |
|                 |     |           |        | GERA+GIANT+UKB Meta     |      |      | .008  | 6.9e-6  | 67.08          | .00074 |
| rs513357        | 6   | 69558698  | A/G    | GERA Non-Hispanic white | 1    | .892 | -.035 | 5.3e-6  |                |        |
|                 |     |           |        | GERA Latino             | .98  | .830 | -.050 | .018    |                |        |
|                 |     |           |        | GERA East Asian         | 1    | .744 | -.037 | .042    |                |        |
|                 |     |           |        | GERA African American   | .96  | .899 | -.028 | .52     |                |        |
|                 |     |           |        | GERA South Asian        | 1    | .732 | .021  | .78     |                |        |
|                 |     |           |        | GERA Meta               |      |      | -.036 | 4.4e-8  | .00            | .9     |
|                 |     |           |        | GIANT                   | 1    | .925 | -.003 | .7      |                |        |
|                 |     |           |        | UKB Non-Hispanic white  | 1    | .883 | -.015 | 1.6e-5  |                |        |
|                 |     |           |        | UKB Mixed/Other         | 1    | .855 | -.024 | .31     |                |        |
|                 |     |           |        | UKB South Asian         | 1    | .783 | -.001 | .98     |                |        |
|                 |     |           |        | UKB East Asian          | 1    | .727 | -.019 | .61     |                |        |
|                 |     |           |        | UKB African American    | 1    | .898 | .023  | .37     |                |        |
|                 |     |           |        | GIANT+UKB Meta          |      |      | -.011 | 9.8e-5  | 4.81           | .39    |
|                 |     |           |        | GERA+GIANT+UKB Meta     |      |      | -.015 | 7.8e-9  | 44.82          | .053   |
| rs7938308       | 11  | 13320533  | C/T    | GERA Non-Hispanic white | .97  | .262 | -.025 | 6.7e-6  |                |        |
|                 |     |           |        | GERA Latino             | .95  | .315 | -.056 | .00098  |                |        |
|                 |     |           |        | GERA East Asian         | .99  | .475 | -.036 | .024    |                |        |
|                 |     |           |        | GERA African American   | .91  | .444 | -.003 | .92     |                |        |
|                 |     |           |        | GERA South Asian        | .94  | .293 | .098  | .18     |                |        |
|                 |     |           |        | GERA Meta               |      |      | -.027 | 2.7e-8  | 43.67          | .13    |
|                 |     |           |        | GIANT                   | .97  | .738 | -.010 | .013    |                |        |
|                 |     |           |        | UKB Non-Hispanic white  | .99  | .269 | -.014 | 4.4e-9  |                |        |
|                 |     |           |        | UKB Mixed/Other         | 1    | .334 | .001  | .95     |                |        |
|                 |     |           |        | UKB South Asian         | .99  | .298 | .001  | .93     |                |        |
|                 |     |           |        | UKB East Asian          | .96  | .496 | -.033 | .33     |                |        |
|                 |     |           |        | UKB African American    | .92  | .462 | .023  | .16     |                |        |
|                 |     |           |        | GIANT+UKB Meta          |      |      | -.012 | 1e-9    | 32.17          | .19    |
|                 |     |           |        | GERA+GIANT+UKB Meta     |      |      | -.014 | 8.1e-15 | 55.25          | .013   |
| rs78085088      | 12  | 59682970  | G/A    | GERA Non-Hispanic white | .66  | .039 | .080  | 1.4e-7  |                |        |
|                 |     |           |        | GERA Latino             | .93  | .021 | .109  | .047    |                |        |
|                 |     |           |        | GERA East Asian         | .58  | .003 | .216  | .29     |                |        |
|                 |     |           |        | GERA African American   | .5   | .009 | .431  | .022    |                |        |
|                 |     |           |        | GERA South Asian        | .45  | .015 | .989  | .0095   |                |        |
|                 |     |           |        | GERA Meta               |      |      | .085  | 5.6e-9  | 27.00          | .25    |
|                 |     |           |        | GIANT                   | .46  | .961 | .010  | .29     |                |        |
|                 |     |           |        | UKB Non-Hispanic white  | .94  | .031 | .001  | .91     |                |        |
|                 |     |           |        | UKB Mixed/Other         | .94  | .014 | .003  | .97     |                |        |
|                 |     |           |        | UKB South Asian         | .98  | .008 |       |         |                |        |
|                 |     |           |        | UKB East Asian          | .77  | .000 |       |         |                |        |
|                 |     |           |        | UKB African American    | .92  | .004 |       |         |                |        |
|                 |     |           |        | GIANT+UKB Meta          |      |      | .004  | .49     | .00            | .72    |
|                 |     |           |        | GERA+GIANT+UKB Meta     |      |      | .013  | .0076   | 81.98          | 2.1e-6 |
| rs306890        | X   | 154987147 | C/T    | GERA Non-Hispanic white | 1    | .247 | .051  | 8.2e-19 |                |        |
|                 |     |           |        | GERA Latino             | 1    | .337 | .043  | .0085   |                |        |
|                 |     |           |        | GERA East Asian         | 1    | .316 | .045  | .01     |                |        |
|                 |     |           |        | GERA African American   | 1    | .188 | .057  | .081    |                |        |
|                 |     |           |        | GERA South Asian        | 1    | .373 | .028  | .67     |                |        |
|                 |     |           |        | GERA Meta               |      |      | .050  | 2.1e-22 | .00            | .98    |
|                 |     |           |        | GIANT                   |      |      |       |         |                |        |
|                 |     |           |        | UKB Non-Hispanic white  | .14  | .266 |       |         |                |        |
|                 |     |           |        | UKB Mixed/Other         | .15  | .258 |       |         |                |        |
|                 |     |           |        | UKB South Asian         | .11  | .284 |       |         |                |        |
|                 |     |           |        | UKB East Asian          | .15  | .263 |       |         |                |        |
|                 |     |           |        | UKB African American    | .18  | .185 |       |         |                |        |
|                 |     |           |        | GIANT+UKB Meta          |      |      | .016  | .011    | .00            | .91    |
|                 |     |           |        | GERA+GIANT+UKB Meta     |      |      | .036  | 5.6e-20 | 52.60          | .025   |

Table S4. Previously known BMI loci.

| SNP         | Chr | Pos       | Allele | non-Hispanic white |      |        | Latino  |     |      | East Asian |      |     | African American |        |       | South Asian |      |        | GERA |                |       | GIANT EUR |       |                | GERA+GIANT Meta |         |         |         |         |       |         |       |       |
|-------------|-----|-----------|--------|--------------------|------|--------|---------|-----|------|------------|------|-----|------------------|--------|-------|-------------|------|--------|------|----------------|-------|-----------|-------|----------------|-----------------|---------|---------|---------|---------|-------|---------|-------|-------|
|             |     |           |        | Info               | Frq  | P      | Info    | Frq | P    | Info       | Frq  | P   | Info             | Frq    | P     | Info        | Frq  | P      | Eff  | r <sup>2</sup> | Eff   | P         | Eff   | r <sup>2</sup> | Het             | P       |         |         |         |       |         |       |       |
| rs120443597 | 1   | 1708801   | A/G    | Prev .96           | .494 | -.003  | .6      | .99 | .455 | .008       | .63  | .96 | .503             | -.010  | .56   | .97         | .827 | .017   | .6   | -.002          | .65   | .00       | .89   | -.015          | 1.4e-6          | -.011   | 2.2e-5  | 29.16   | .22     |       |         |       |       |
| rs2803328   | 1   | 1874326   | C/G    | Prev .97           | .498 | -.002  | .65     | .98 | .480 | -.009      | .58  | .96 | .493             | -.017  | .3    | .97         | .771 | -.004  | .88  | -.004          | .38   | .00       | .93   | -.015          | 3.4e-6          | -.011   | 1.9e-5  | 6.83    | .37     |       |         |       |       |
| rs7533528   | 1   | 2444414   | C/G    | Prev .58           | .614 | .017   | .0076   | .94 | .697 | -.008      | .64  | .66 | .663             | -.006  | .77   | .91         | .882 | .047   | .24  | .56            | -.726 | -.056     | .57   | -.018          | 3.2e-5          | -.017   | 1.1e-6  | .00     | .75     |       |         |       |       |
| rs17396340  | 1   | 11028616  | G/A    | Prev .98           | .868 | .001   | .92     | .97 | .911 | -.004      | .88  | .94 | .983             | .096   | .13   | .96         | .924 | -.019  | .82  | -.001          | .93   | .00       | .95   | -.003          | .46             | -.003   | .51     | .00     | .48     |       |         |       |       |
| rs12711521  | 1   | 11029616  | C/A    | Prev .1            | .192 | .000   | .97     | 1   | .213 | .017       | .37  | 1   | .316             | -.045  | .0079 | 1           | .688 | .001   | .97  | -.003          | .58   | .00       | .91   | -.014          | .0049           | -.006   | .591    | .61     | .81     |       |         |       |       |
| rs3820071   | 1   | 15808767  | G/A    | Prev .1            | .741 | .008   | .13     | 1   | .704 | .040       | .019 | 1   | .438             | .006   | .72   | 1           | .742 | .027   | .36  | -.011          | .022  | .00       | .48   | -.013          | .0018           | -.012   | 1.3e-5  | .00     | .61     |       |         |       |       |
| rs37666160  | 1   | 15808872  | G/A    | Prev .1            | .754 | .008   | .13     | 1   | .724 | .037       | .031 | 1   | .460             | .007   | .65   | 1           | .741 | .028   | .73  | -.012          | .024  | .00       | .52   | -.006          | .078            | -.008   | .0064   | .00     | .79     |       |         |       |       |
| rs9435732   | 1   | 17308158  | C/T    | Prev .82           | .725 | -.014  | .02     | .99 | .661 | -.021      | .2   | .69 | .474             | .005   | .81   | .98         | .781 | .032   | .3   | .73            | .650  | -.035     | .67   | -.006          | .078            | -.008   | .0064   | .00     | .55     |       |         |       |       |
| rs4920605   | 1   | 17315425  | G/A    | Prev .85           | .447 | -.012  | .02     | .99 | .503 | .024       | .13  | .83 | .718             | -0.000 | .99   | .98         | .691 | .003   | .91  | .8             | .548  | -.044     | .55   | -.007          | .06             | .009    | .0023   | .00     | .79     |       |         |       |       |
| rs3738814   | 1   | 17331676  | A/G    | Prev .88           | .569 | -0.011 | .034    | 1   | .515 | -0.017     | .27  | .9  | .285             | -0.009 | .64   | 1           | .371 | .021   | .41  | .85            | -.426 | .074      | .3    | -.010          | .031            | .00     | .0057   | -.006   | .61     |       |         |       |       |
| rs10799790  | 1   | 23418153  | C/T    | Prev .1            | .168 | .011   | .081    | 1   | .328 | .022       | .18  | 1   | .197             | .015   | .44   | 1           | .189 | -.020  | .52  | 1              | .397  | -.059     | .37   | -.011          | .044            | .00     | .62     | .020    | .0001   | .00   | .56     |       |       |
| rs3765407   | 1   | 23419374  | G/T    | Prev .1            | .169 | .010   | .13     | 1   | .339 | .026       | .11  | 1   | .198             | .015   | .44   | 1           | .376 | -.020  | .43  | 1              | .399  | -.053     | .42   | .010           | .066            | .00     | .51     | .019    | .00029  | .00   | .45     |       |       |
| rs477830    | 1   | 23419383  | C/T    | Prev .1            | .169 | .010   | .13     | 1   | .337 | .025       | .11  | 1   | .197             | .014   | .44   | 1           | .332 | -.013  | .63  | 1              | .402  | -.053     | .42   | .010           | .062            | .00     | .64     | .017    | .00032  | .00   | .66     |       |       |
| rs2076463   | 1   | 27971092  | A/G    | Prev .86           | .982 | -.022  | .26     | .94 | .951 | .038       | .29  | .95 | .660             | .001   | .96   | 1           | .613 | .039   | .13  | .88            | .802  | .029      | .74   | .004           | .69             | 14.97   | .32     | -.002   | .89     | .00   | .44     |       |       |
| rs2271928   | 1   | 32127653  | G/A    | Prev .32           | .593 | .011   | .023    | 1   | .565 | .014       | .38  | .82 | .356             | .033   | .076  | 1           | .511 | .029   | .24  | .88            | .593  | .005      | .95   | .008           | .096            | 47.82   | .1      | .013    | 1.6e-5  | .00   | .61     |       |       |
| rs22285560  | 1   | 32164206  | T/G    | Prev .34           | .364 | -0.009 | .13     | .96 | .373 | -.027      | .097 | .68 | .37              | -0.07  | .73   | .95         | .246 | -.009  | .77  | .56            | .442  | -.017     | .84   | -.011          | .041            | .00     | .89     | -.014   | .00026  | -.013 | 3.1e-5  | .00   | .94   |
| rs2228552   | 1   | 32165495  | G/T    | Prev .35           | .382 | -0.009 | .10     | 1   | .449 | -.032      | .039 | .64 | .720             | -.003  | .39   | 1           | .601 | -.004  | .89  | .37            | .445  | .029      | .74   | -.011          | .045            | .00     | .66     | -.011   | .00036  | -.013 | 1.0e-5  | .00   | .66   |
| rs22260172  | 1   | 33853617  | A/G    | Prev .1            | .783 | -0.030 | 1.9e-7  | 1   | .791 | -.022      | .34  | 1   | .822             | -.039  | .06   | 1           | .945 | -.032  | .57  | 1              | .889  | .077      | .49   | -.030          | 1.9e-8          | .00     | .86     | -.008   | .046    | -.015 | 9.5e-7  | 61.08 | .025  |
| rs61779328  | 1   | 39953487  | A/G    | Prev .98           | .808 | -0.034 | 3.6e-8  | .98 | .809 | -0.020     | .31  | .97 | .863             | -.067  | .0045 | .94         | .930 | -.045  | .46  | .96            | .903  | .087      | .44   | -.034          | 1.2e-9          | .00     | .46     | -.008   | .067    | -.018 | 1.6e-7  | 69.67 | .0056 |
| rs2275426   | 1   | 46487532  | G/A    | Prev .99           | .558 | -0.002 | .66     | 1   | .509 | .009       | .38  | .99 | .397             | .010   | .54   | .99         | .375 | -0.015 | .57  | .99            | .546  | .008      | .9    | -.001          | .87             | .00     | .88     | -.015   | 3e-6    | .00   | .88     |       |       |
| rs1707322   | 1   | 46505147  | A/G    | Prev .1            | .292 | -0.000 | .97     | 1   | .323 | .011       | .5   | .99 | .342             | .004   | .81   | 1           | .364 | -.030  | .26  | 1              | .388  | -.014     | .83   | .000           | 1               | -.006   | .057    | -.010   | 5.6e-6  | .00   | .12     |       |       |
| rs9777747   | 1   | 47684677  | T/G    | Prev .99           | .398 | -0.019 | .00012  | .99 | .518 | -0.018     | .25  | .99 | .917             | -0.015 | .61   | .98         | .647 | .031   | .24  | .99            | .520  | .013      | .84   | -.018          | 5.7e-5          | .00     | .81     | -.017   | 8.7e-8  | .00   | .89     |       |       |
| rs3127553   | 1   | 49438005  | G/A    | Prev .1            | .367 | .019   | .00013  | .99 | .381 | .038       | .018 | .98 | .705             | .007   | .67   | .99         | .234 | -.029  | .3   | .99            | .476  | -.061     | .32   | -.023          | 1.2e-12         | -.021   | 2.9e-16 | 30.98   | .2      | .34   |         |       |       |
| rs4582848   | 1   | 50312200  | A/C    | Prev .1            | .321 | .024   | 3.1e-6  | 1   | .368 | .024       | .13  | 1   | .705             | .005   | .75   | .99         | .455 | -.050  | .049 | .42            | .016  | .00023    | .690  | .37            | .023            | 5.6e-13 | -.021   | 4.8e-16 | 11.11   | .34   |         |       |       |
| rs15683200  | 1   | 50359820  | C/T    | Prev .1            | .383 | .020   | 3.1e-5  | 1   | .476 | .031       | .046 | 1   | .868             | .032   | .17   | 1           | .687 | -.013  | .63  | 1              | .518  | -.059     | .35   | .020           | 5.8e-6          | .00     | .43     | .018    | 1.5e-8  | .00   | .54     |       |       |
| rs12140153  | 1   | 62579891  | G/T    | Prev .87           | .920 | .028   | .00025  | .85 | .953 | .043       | .28  | .81 | .993             | .070   | .5    | .81         | .978 | .172   | .066 | .81            | .966  | .088      | .64   | .031           | .00063          | .00     | .61     | .016    | .017    | -.021 | 8e-5    | .00   | .48   |
| rs2481665   | 1   | 62594677  | T/C    | Prev .98           | .564 | .023   | 2.5e-6  | .97 | .694 | .024       | .15  | .96 | .961             | -.023  | .58   | .98         | .851 | .062   | .084 | .93            | .752  | .069      | .37   | -.023          | 4.3e-7          | .00     | .6      | .016    | 1.9e-7  | .00   | .48     |       |       |
| rs11208659  | 1   | 657979280 | T/C    | Prev .99           | .909 | -0.030 | .000026 | 1   | .896 | -0.015     | .56  | .98 | .930             | .007   | .82   | .99         | .678 | .036   | .2   | .97            | .821  | -.381     | .1e-9 | -.025          | .00074          | 82.97   | .0001   | -.022   | 1.3e-5  | 79.02 | .00023  | .00   | .63   |
| rs11209943  | 1   | 672705000 | A/G    | Prev .1            | .373 | -0.030 | 1.4e-9  | 1   | .321 | -.041      | .012 | 1   | .092             | -.049  | .073  | 1           | .709 | .030   | .29  | 1              | .339  | -.010     | .89   | -.029          | 1e-10           | 28.73   | .23     | -.032   | 4.7e-18 | -.031 | 3.7e-27 | 13.93 | .33   |
| rs31013336  | 1   | 72751185  | T/C    | Prev .1            | .372 | -0.030 | 1.3e-9  | 1   | .305 | -.042      | .014 | 1   | .901             | -.052  | .06   | 1           | .456 | .033   | .19  | 1              | .338  | -.007     | .91   | -.029          | 1.7e-10         | 45.46   | .12     | -.033   | 2.7e-26 | -.032 | 7.4e-36 | 37.24 | .16   |
| rs61765650  | 1   | 72753112  | A/G    | Prev .1            | .829 | .040   | 2.2e-10 | 1   | .879 | .055       | .02  | .99 | .980             | .072   | .2    | 1           | .924 | -.042  | .38  | .99            | .932  | .271      | .024  | .041           | 1.3e-11         | 45.32   | .12     | -.037   | 1.2e-14 | -.038 | 1.1e-24 | 34.16 | .18   |
| rs2569588   | 1   | 72765116  | G/A    | Prev .1            | .372 | -0.030 | 1.1e-9  | 1   | .305 | -.043      | .01  | 1   | .092             | -.046  | .089  | 1           | .456 | .032   | .2   | 1              | .339  | -.010     | .89   | -.029          | 1.3e-10         | 43.63   | .13     | -.033   | 3.3e-25 | -.031 | 8.6e-35 | 33.31 | .19   |
| rs2815752   | 1   | 72812440  | C/T    | Prev .1            | .377 | -0.029 | 2.1e-9  | .99 | .307 | -.042      | .014 | .99 | .092             | -.049  | .074  | .98         | .454 | .027   | .28  | 1              | .337  | -.006     | .93   | -.029          | 2.3e-10         | 34.33   | .19     | -.033   | 3e-25   | -.031 | 1.5e-34 | 23.91 | .25   |
| rs990871    | 1   | 72832713  | C/T    | Prev .1            | .372 | -0.030 | 1.4e-9  | .98 | .314 | -.039      | .021 | .98 | .096             | -.054  | .045  | .97         | .494 | .024   | .36  | .99            | .346  | -.006     | .93   | -.029          | 1.2e-10         | 27.23   | .24     | -.032   | 2.8e-25 | -.032 | 2.1e-35 | 16.34 | .31   |
| rs7531118   | 1   | 72837239  | T/C    | Prev .92           | .477 | -.026  | 2e-7    | .9  | .567 | -.024      | .15  | .88 | .681             | -.025  | .17   | .91         | .848 | .023   | .52  | .88            | .698  | -.131     | .085  | -.025          | 3e-8            | .00     | .44     | -.033   | 9.7e-25 | -.030 | 3.1e-31 | 12.38 | .34   |
| rs11209951  | 1   | 72837490  | C/T    | Prev .99           | .375 | -.029  | 2.1e-10 | .98 | .307 | -.038      | .024 | .98 | .096             | -.055  | .04   | .97         | .441 | .020   | .43  | .97            | .343  | -.001     | .99   | -.029          | 1.7e-10         | 21.39   | .28     | -.039   | 1.3e-25 | -.032 | 4e-35   | 10.55 | .35   |
| rs1993709   | 1   | 72838529  | A/C    | Prev .1            | .178 | -0.038 | 7.8e-10 | .98 | 1.26 | -.051      | .03  | 1   | .024             | -.081  | .12   | .96         | .141 | .020   | .96  | 1              | .080  | -.250     | .033  | -.039          | 3.1e-11         | 25.43   | .25     | -.039   | 1.7e-   |       |         |       |       |

| SNP        | Chr | Pos       | Allele | non-Hispanic white |      |      | Latino |         |      | East Asian |       |      | African American |      |       | South Asian |      |      | GERA  |      |       | GIANT EUR |         |      | GERA+GIANT Meta |         |         |         |       |         |         |         |       |       |     |     |
|------------|-----|-----------|--------|--------------------|------|------|--------|---------|------|------------|-------|------|------------------|------|-------|-------------|------|------|-------|------|-------|-----------|---------|------|-----------------|---------|---------|---------|-------|---------|---------|---------|-------|-------|-----|-----|
|            |     |           |        | Info               | Freq | Eff  | P      | Info    | Freq | Eff        | P     | Info | Freq             | Eff  | P     | Info        | Freq | Eff  | P     | Eff  | P     | Eff       | P       | Eff  | P               | Het     | P       |         |       |         |         |         |       |       |     |     |
| rs12143789 | 1   | 119497154 | G/C    | Prev               | 1    | .829 | .001   | .89     | 1    | .916       | -.060 | .034 | 1                | .903 | .040  | .55         | .99  | .900 | -.109 | .3   | -.001 | .89       | .3750   | .17  | .006            | .098    | .004    | .18     | 32.91 | .19     |         |         |       |       |     |     |
| rs9842422  | 1   | 119503843 | G/C    | Prev               | 1    | .404 | .021   | 8.4e-6  | 1    | .466       | -.030 | .073 | 1                | .340 | .003  | .9          | .99  | .354 | .013  | .85  | .022  | 2.4e-7    | .00     | .84  | .011            | .00066  | .015    | 6.2e-9  | 19.86 | .28     |         |         |       |       |     |     |
| rs10923712 | 1   | 119505434 | G/A    | Prev               | 1    | .404 | .021   | 8.4e-6  | 1    | .466       | -.030 | .073 | 1                | .340 | .003  | .9          | .99  | .354 | .013  | .85  | .022  | 2.4e-7    | .00     | .84  | .011            | .00066  | .015    | 6.2e-9  | 19.86 | .28     |         |         |       |       |     |     |
| rs11006529 | 1   | 11951497  | G/A    | Prev               | .99  | .274 | .015   | .0038   | .99  | .314       | .022  | .19  | .96              | .166 | .049  | .16         | .98  | .413 | .036  | .6   | .018  | .00015    | .00     | .75  | .009            | .01     | .012    | 1.8e-5  | .00   | .52     |         |         |       |       |     |     |
| rs10923724 | 1   | 119546842 | C/T    | Prev               | 1    | .446 | .016   | .0032   | .99  | .408       | .022  | .044 | .96              | .166 | .049  | .16         | .98  | .413 | .036  | .6   | .018  | .00015    | .00     | .75  | .009            | .01     | .012    | 1.8e-5  | .00   | .58     |         |         |       |       |     |     |
| rs2765539  | 1   | 119574948 | C/T    | Prev               | .99  | .286 | .01    | .039    | .99  | .311       | .024  | .15  | .96              | .166 | .049  | .16         | .98  | .413 | .036  | .6   | .018  | .00015    | .00     | .75  | .009            | .01     | .012    | 1.8e-5  | .00   | .58     |         |         |       |       |     |     |
| rs10232223 | 1   | 119574587 | C/T    | Prev               | 1    | .447 | .016   | .0032   | .99  | .408       | .022  | .044 | .96              | .166 | .049  | .16         | .98  | .413 | .036  | .6   | .018  | .00015    | .00     | .75  | .009            | .01     | .012    | 1.8e-5  | .00   | .58     |         |         |       |       |     |     |
| rs17022277 | 1   | 149828782 | T/C    | Prev               | 1    | .650 | .015   | .0027   | 1    | .811       | -.009 | .64  | .99              | .307 | .037  | .15         | .97  | .578 | .056  | .38  | .015  | 1.2e-6    | .00     | .8   | .011            | .0007   | .014    | 2e-8    | 8.07  | .36     |         |         |       |       |     |     |
| rs11205301 | 1   | 149828782 | T/C    | Prev               | 1    | .372 | .005   | .33     | 1    | .665       | -.000 | .1   | .99              | .807 | -.053 | .13         | .99  | .630 | -.019 | .77  | .005  | .22       | .3937   | .16  | .005            | .14     | .005    | .034    | 24.32 | .25     |         |         |       |       |     |     |
| rs12230361 | 1   | 150727539 | G/A    | Prev               | 1    | .601 | .006   | .21     | 1    | .685       | -.005 | .76  | 1                | .891 | -.059 | .33         | 1    | .641 | -.038 | .57  | .007  | .71       | 10.67   | .33  | .006            | .07     | .007    | .015    | .00   | .48     |         |         |       |       |     |     |
| rs4512652  | 1   | 151115690 | G/C    | Prev               | .96  | .300 | .013   | .013    | .95  | .252       | -.031 | .084 | .94              | .572 | -.027 | .31         | .96  | .256 | -.012 | .88  | .014  | .0032     | 19.44   | .29  | .018            | 9.6e-5  | .017    | 1.2e-7  | 6.34  | .38     |         |         |       |       |     |     |
| rs9050938  | 1   | 154991389 | T/C    | Prev               | 1    | .743 | -.003  | .54     | 1    | .812       | -.005 | .82  | 1                | .732 | .001  | .96         | 1    | .836 | .159  | .075 | -.002 | .68       | .00     | .43  | -.014           | .98e-5  | -.010   | .00077  | 34.53 | .18     |         |         |       |       |     |     |
| rs8606295  | 1   | 155767708 | A/G    | Prev               | .99  | .338 | .001   | .84     | .99  | .430       | -.004 | .81  | .98              | .668 | .020  | .24         | .98  | .381 | -.134 | .048 | .001  | .89       | 35.40   | .19  | -.006           | .14     | -.003   | .3      | 31.48 | .2      |         |         |       |       |     |     |
| rs1749405  | 1   | 155866091 | G/A    | Prev               | 1    | .344 | -.003  | .6      | 1    | .444       | -.002 | .9   | .95              | .775 | .025  | .2          | 1    | .735 | -.017 | .55  | 1     | .440      | .079    | .23  | -.002           | .7      | .00012  | .0003   | .00   | .89     |         |         |       |       |     |     |
| rs2297792  | 1   | 156011444 | T/C    | Prev               | .95  | .391 | -.007  | .18     | .95  | .484       | -.003 | .87  | .93              | .816 | .003  | .88         | .92  | .551 | -.006 | .81  | .91   | .439      | .067    | .32  | -.006           | .18     | .00     | .9      | -.013 | .00076  | .00     | .8      |       |       |     |     |
| rs122075   | 1   | 159175354 | G/A    | Prev               | 1    | .423 | .004   | .37     | .99  | .478       | -.009 | .35  | 1                | .906 | -.007 | .79         | .98  | .103 | .005  | .91  | 1     | .642      | -.013   | .84  | .001            | .77     | -.002   | .55     | .00   | .96     |         |         |       |       |     |     |
| rs347313   | 1   | 162304276 | A/G    | Prev               | 1    | .439 | .000   | .98     | 1    | .766       | -.028 | .14  | 1                | .672 | -.010 | .71         | 1    | .673 | -.104 | .11  | -.003 | .47       | 19.42   | .29  | .002            | .43     | .001    | .83     | 17.17 | .3      |         |         |       |       |     |     |
| rs4471313  | 1   | 170367466 | G/T    | Prev               | .99  | .279 | .012   | .022    | .99  | .306       | -.003 | .88  | .97              | .232 | -.011 | .56         | .98  | .324 | -.002 | .94  | .96   | .234      | .179    | .026 | .010            | .045    | 38.96   | .16     | .000  | .93     | .004    | .2      | 44.01 | .11   |     |     |
| rs10919388 | 1   | 170372503 | A/C    | Prev               | .99  | .279 | .012   | .023    | .98  | .305       | -.003 | .88  | .96              | .232 | -.012 | .52         | .96  | .326 | -.005 | .85  | .95   | .234      | .176    | .029 | .009            | .05     | 39.57   | .16     | .000  | .91     | .004    | .21     | 43.67 | .11   |     |     |
| rs4656767  | 1   | 170379727 | A/C    | Prev               | .99  | .718 | -.002  | .67     | .98  | .733       | -.007 | .71  | .99              | .744 | .030  | .1          | .97  | .895 | -.033 | .43  | .97   | .706      | -.113   | .12  | -.001           | .51     | -.002   | .5      | 16.26 | .31     |         |         |       |       |     |     |
| rs1894633  | 1   | 172331059 | A/G    | Prev               | 1    | .679 | .009   | .079    | 1    | .708       | -.032 | .056 | .98              | .879 | .014  | .56         | 1    | .488 | .008  | .74  | 1     | .732      | -.041   | .57  | .011            | .023    | .00     | .68     | .006  | .074    | .007    | .00     | .91   |       |     |     |
| rs2001129  | 1   | 172333248 | T/G    | Prev               | 1    | .430 | -.007  | .17     | 1    | .377       | -.014 | .38  | .98              | .148 | -.025 | .27         | .97  | .792 | .017  | .59  | .99   | .443      | .016    | .8   | -.007           | .099    | .00     | .82     | -.007 | .014    | -.007   | .0034   | .00   | .91   |     |     |
| rs1011731  | 1   | 172346548 | G/A    | Prev               | 1    | .424 | -.006  | .24     | 1    | .373       | -.017 | .27  | 1                | .148 | -.029 | .19         | 1    | .795 | .003  | .92  | .99   | .444      | .014    | .82  | -.007           | .1      | .00     | .79     | -.006 | .039    | -.007   | .0094   | .00   | .89   |     |     |
| rs714515   | 1   | 172352990 | G/A    | Prev               | 1    | .425 | -.006  | .25     | 1    | .372       | -.017 | .29  | 1                | .149 | -.030 | .18         | .99  | .792 | .010  | .76  | 1     | .445      | .013    | .83  | -.007           | .11     | .00     | .75     | -.007 | .034    | -.007   | .008    | .00   | .86   |     |     |
| rs10913118 | 1   | 175954755 | A/C    | Prev               | .94  | .669 | -.006  | .28     | .95  | .724       | -.013 | .46  | .89              | .523 | -.005 | .75         | .93  | .842 | -.048 | .18  | .9    | .654      | .125    | .069 | -.006           | .19     | 22.69   | .27     | -.014 | 2.2e-5  | -.011   | 2.3e-5  | 28.28 | .22   |     |     |
| rs4650943  | 1   | 176414781 | A/G    | Prev               | 1    | .542 | -.001  | .78     | 1    | .518       | -.010 | .54  | 1                | .444 | .003  | .85         | 1    | .580 | -.028 | .28  | 1     | .442      | .125    | .051 | -.002           | .67     | 24.46   | .26     | -.005 | .18     | -.004   | .2      | 11.79 | .34   |     |     |
| rs633715   | 1   | 17782580  | T/C    | Prev               | .99  | .804 | -.049  | 1.3e-17 | .99  | .817       | -.041 | .041 | .99              | .847 | -.054 | .013        | .97  | .800 | -.009 | .83  | .99   | .842      | .024    | .77  | -.048           | 1.7e-18 | .00     | .74     | -.048 | 1.4e-33 | -.048   | 1.4e-49 | .00   | .85   |     |     |
| rs571567   | 1   | 177872905 | G/A    | Prev               | 1    | .804 | -.050  | 3.7e-17 | 1    | .816       | -.041 | .042 | 1                | .849 | -.054 | .013        | .98  | .885 | -.021 | .59  | .99   | .842      | .025    | .77  | -.048           | 1.7e-18 | .00     | .81     | -.046 | 1.2e-24 | -.047   | 4.3e-42 | .00   | .88   |     |     |
| rs574367   | 1   | 177873210 | G/T    | Prev               | 1    | .804 | -.050  | 6.9e-17 | 1    | .816       | -.041 | .042 | 1                | .849 | -.054 | .013        | .98  | .885 | -.021 | .58  | 1     | .843      | .029    | .73  | -.048           | 1.7e-18 | .00     | .81     | -.046 | 4.6e-33 | -.047   | 6.3e-50 | .00   | .89   |     |     |
| rs630372   | 1   | 177885762 | G/A    | Prev               | 1    | .780 | -.048  | 1.1e-16 | 1    | .787       | -.030 | .11  | 1                | .785 | -.041 | .029        | .99  | .829 | .031  | .71  | 1     | .045      | 2.7e-19 | .00  | .77             | -.045   | 2.7e-19 | .00     | .77   | -.045   | 6.8e-41 | .00     | .87   |       |     |     |
| rs539515   | 1   | 177889025 | A/C    | Prev               | 1    | .809 | -.050  | 6.4e-17 | 1    | .812       | -.037 | .061 | 1                | .849 | -.055 | .012        | 1    | .746 | -.020 | .48  | 1     | .844      | .024    | .78  | -.048           | 1e-18   | .00     | .77     | -.047 | 3e-25   | -.048   | 2.6e-42 | .00   | .81   |     |     |
| rs543874   | 1   | 177889480 | A/G    | Prev               | 1    | .808 | -.050  | 1.1e-16 | 1    | .811       | -.041 | .039 | 1                | .849 | -.055 | .012        | 1    | .745 | -.021 | .47  | 1     | .844      | .022    | .79  | -.048           | 1e-18   | .00     | .75     | -.048 | 2.6e-35 | -.048   | 4.2e-52 | .00   | .86   |     |     |
| rs545608   | 1   | 177909121 | G/C    | Prev               | 1    | .808 | -.050  | 8.3e-17 | 1    | .812       | -.039 | .048 | 1                | .810 | -.056 | .0058       | 1    | .756 | -.013 | .65  | 1     | .842      | .020    | .81  | -.051           | 5.1e-21 | -.019   | 3.4e-38 | .00   | .75     | -.049   | 1e-14   | .00   | .85   |     |     |
| rs591120   | 1   | 177902753 | G/C    | Prev               | 1    | .558 | -.017  | .00038  | 1    | .569       | -.014 | .39  | 1                | .668 | -.024 | .16         | 1    | .532 | .012  | .64  | 1     | .590      | .037    | .57  | -.016           | .00015  | .00     | .81     | -.012 | 5.2e-12 | -.019   | 1e-14   | .00   | .88   |     |     |
| rs10913469 | 1   | 177913475 | T/C    | Prev               | 1    | .809 | -.046  | 1.7e-14 | 1    | .810       | -.041 | .035 | 1                | .817 | -.027 | .19         | 1    | .710 | -.037 | .18  | 1     | .829      | .069    | .4   | -.044           | 9.2e-16 | .00     | .58     | -.047 | 2.3e-23 | -.045   | 1.9e-37 | .00   | .69   |     |     |
| rs1926872  | 1   | 184018319 | T/C    | Prev               | 1    | .663 | .003   | .55     | 1    | .691       | -.012 | .49  | 1                | .547 | .020  | .2          | 1    | .842 | .034  | .33  | 1     | .669      | .027    | .69  | .006            | .21     | .00     | .73     | .005  | .24     | -.006   | .086    | .00   | .84   |     |     |
| rs22774432 | 1   | 184020945 | G/A    | Prev               | 1    | .664 | .002   | .69     | 1    | .691       | -.011 | .52  | 1                | .549 | .020  | .21         | 1    | .842 | .032  | .35  | 1     | .671      | .028    | .69  | .005            | .3      | .00     | .73     | .006  | .074    | -.005   | .044    | .00   | .84   |     |     |
| rs1046934  | 1   | 184023529 | A/C    | Prev               | 1    | .664 | .002   | .64     | 1    | .692       | -.012 | .48  | 1                | .547 | .021  | .19         | 1    | .843 | .028  | .42  | 1     | .671      | .028    | .69  | .005            | .26     | .00     | .74     | .006  | .074    | -.005   | .044    | .00   | .85   |     |     |
| rs10920678 | 1   | 190239907 | A/G    | Prev               | .99  | .417 | .020   | 2.9e-5  | .99  | .318       | -.018 | .29  | 1                | .355 | .015  | .35         | .98  | .405 | .052  | .045 | .99   | .357      | -.066   | .32  | .020            | 4.2e-6  | .00     | .51     | .014  | 8.7e-6  | -.017   | 2.3e-9  | .00   | .55   |     |     |
| rs491055   | 1   | 190308834 | A/G    | Prev               | .98  | .426 | .020   | 2.9e-5  | .97  | .320       | -.014 | .4   | .94              | .394 | .026  | .12         | .98  | .455 | .041  | .11  | .98   | .361      | -.071   | .29  | .020            | 3.5e-6  | .00     | .6      | .015  | 4.6e-5  | -.017   | 2.3e-9  | .00   | .55   |     |     |
| rs1998871  | 1   | 190670884 | C/T    | Prev               | 1    | .439 | -.006  | .23     | 1    | .461       | -.017 | .27  | 1                | .330 | -.003 | .88         | 1    | .330 | .031  | .25  | 1     | .519      | -.006   | .92  | -.005           | .29     | .00     | .66     | -.011 | .0027   | -.009   | .0019   | .00   | .63   |     |     |
| rs10754220 | 1   | 197244290 | G/A    | Prev               | .99  | .721 | .022   | 3.1e-5  | .99  | .751       | .030  | .098 | .94              | .833 | .022  | .55         | .98  | .715 | -.014 | .85  | .925  | .98e-6    | .00     | .91  | .013            | .0013   | -.017   | 1.1e-7  | .00   | .74     | -.020   | .043    | -.020 | .0053 | .00 | .78 |
| rs16848342 | 1   | 201754444 | G/C    | Prev               | .95  | .458 | -.018  | .1      | 1    | .966       | -.051 | .23  | .66              | .996 | .130  | .39         | 1    | .923 | -.046 | .45  | .84   | .981      | -.211   | .42  | -.020           | .055    | .00     | .63     | -.020 | .043    | -.020   | .0053   | .00   | .78   |     |     |
| rs2820292  | 1   | 201784287 | A/C    | Prev               | 1    | .457 | -.023  | 1.2e-6  | 1    | .540       | -.047 | .025 | 1                | .742 | .001  | .94         |      |      |       |      |       |           |         |      |                 |         |         |         |       |         |         |         |       |       |     |     |



| SNP         | Chr | Pos        | Allele | non-Hispanic white |      |       | Latino |        |      | East Asian |       |       | African American |      |       | South Asian |      |      | GERA  |       |      | GIANT EUR |       |       | GERA+GIANT Meta |        |        |        |       |         |       |        |       |     |     |
|-------------|-----|------------|--------|--------------------|------|-------|--------|--------|------|------------|-------|-------|------------------|------|-------|-------------|------|------|-------|-------|------|-----------|-------|-------|-----------------|--------|--------|--------|-------|---------|-------|--------|-------|-----|-----|
|             |     |            |        | Info               | Freq | Eff   | P      | Info   | Freq | Eff        | P     | Info  | Freq             | Eff  | P     | Info        | Freq | Eff  | P     | Eff   | P    | Eff       | P     | Eff   | P               | Eff    | P      |        |       |         |       |        |       |     |     |
| rs7570971   | 2   | 135837906  | G/A    | Prev               | 1    | .598  | -.012  | .012   | .97  | .331       | -.024 | .14   | .94              | .039 | -.028 | .49         | .92  | .168 | .001  | .97   | .1   | .176      | -.014 | .85   | .013            | .0043  | .00    | .92    |       |         |       |        |       |     |     |
| rs4988235   | 2   | 136080646  | G/A    | Prev               | 1    | .386  | -.016  | .00063 | 1    | .676       | -.017 | .28   | .98              | .84  | .826  | -.003       | .93  | .94  | .826  | -.003 | .93  | .1        | .819  | -.028 | .71             | -.016  | 1.5e-6 | .00    | .92   |         |       |        |       |     |     |
| rs126017004 | 2   | 1426015136 | G/C    | Prev               | .99  | .765  | -.002  | .75    | .98  | .784       | -.005 | .44   | .98              | .715 | -.011 | .78         | .99  | .752 | -.050 | .52   | .99  | .004      | .4    | -.002 | .49             | .00    | .99    | .99    |       |         |       |        |       |     |     |
| rs28906052  | 2   | 143959931  | T/C    | Prev               | 1    | .838  | -.017  | .0092  | 1    | .881       | -.026 | .13   | .91              | .978 | -.001 | .99         | 1    | .690 | -.046 | .087  | 1    | .946      | -.111 | .43   | -.019           | .0013  | .00    | .7     |       |         |       |        |       |     |     |
| rs2121279   | 1   | 875        | -.015  | .036               | .95  | .919  | -.027  | .33    | .91  | .993       | -.121 | .99   | .91              | .922 | -.073 | .24         | 1    | .960 | -.109 | .51   | 1    | .960      | -.109 | .51   | -.012           | 2.3e-8 | .00    | .46    |       |         |       |        |       |     |     |
| rs21214967  | 2   | 1609589486 | T/C    | Prev               | .99  | .616  | -.012  | .011   | .99  | .667       | -.010 | .56   | .99              | .664 | -.006 | .37         | .99  | .787 | -.088 | .27   | .99  | .011      | .012  | .00   | .64             | -.007  | .0038  | .00    | .6    |         |       |        |       |     |     |
| rs164507689 | 2   | 164507689  | T/C    | Prev               | .99  | .835  | -.017  | .0079  | .99  | .698       | -.036 | .11   | .99              | .647 | -.027 | .11         | .96  | .744 | .006  | .85   | .97  | .855      | -.135 | .15   | -.010           | 9e-7   | .00    | .14    |       |         |       |        |       |     |     |
| rs1460678   | 2   | 164584156  | C/G    | Prev               | .98  | .888  | -.008  | .27    | .96  | .920       | .016  | .58   | .98              | .897 | -.047 | .072        | .93  | .871 | -.038 | .33   | .95  | .885      | -.190 | .071  | -.022           | 1.3e-6 | .50    | .70    |       |         |       |        |       |     |     |
| rs10170665  | 2   | 165345660  | A/C    | Prev               | 1    | .336  | -.003  | .51    | .99  | .339       | .011  | .48   | 1                | .612 | .001  | .94         | .99  | .556 | .026  | .31   | .99  | .442      | .033  | .62   | .011            | .88    | .00    | .65    |       |         |       |        |       |     |     |
| rs10195252  | 2   | 165513091  | A/C    | Prev               | .99  | .595  | -.003  | .52    | 1    | .686       | -.015 | .36   | .98              | .900 | -.031 | .24         | .99  | .309 | .021  | .45   | .99  | .786      | -.052 | .52   | -.004           | .34    | .00    | .61    |       |         |       |        |       |     |     |
| rs1128249   | 2   | 165528624  | G/T    | Prev               | .99  | .606  | -.003  | .51    | 1    | .693       | -.008 | .64   | .97              | .901 | -.030 | .27         | 1    | .308 | .013  | .65   | .98  | .789      | -.056 | .49   | -.012           | 7.2e-5 | .00    | .54    |       |         |       |        |       |     |     |
| rs13388219  | 2   | 165528876  | C/T    | Prev               | .99  | .606  | -.003  | .51    | 1    | .693       | -.008 | .64   | .97              | .901 | -.030 | .27         | 1    | .309 | .012  | .66   | .98  | .789      | -.056 | .49   | -.004           | .37    | .00    | .78    |       |         |       |        |       |     |     |
| rs6717858   | 2   | 165539661  | T/C    | Prev               | 1    | .596  | -.004  | .37    | 1    | .691       | -.005 | .77   | .96              | .899 | -.027 | .32         | .99  | .309 | .004  | .89   | 1    | .783      | -.047 | .54   | -.005           | .27    | .00    | .9     |       |         |       |        |       |     |     |
| rs12692737  | 2   | 1655454309 | C/A    | Prev               | 1    | .646  | -.009  | .064   | .99  | .727       | -.055 | .078  | .98              | .388 | -.012 | .65         | 1    | .827 | -.051 | .56   | 1    | .010      | .0036 | .00   | .61             | -.010  | .0028  | .00    | .74   |         |       |        |       |     |     |
| rs12692738  | 2   | 165558252  | C/A    | Prev               | 1    | .756  | -.009  | .088   | 1    | .783       | -.004 | .83   | 1                | .931 | -.045 | .15         | 1    | .837 | -.051 | .72   | 1    | .837      | -.051 | .72   | -.013           | .00019 | -.012  | 4.3e-5 | .00   | .68     |       |        |       |     |     |
| rs3769885   | 2   | 165592390  | G/A    | Prev               | 1    | .514  | -.003  | .53    | .99  | .533       | -.020 | .21   | 1                | .629 | -.033 | .44         | .98  | .383 | .005  | .84   | 1    | .567      | .037  | .56   | -.011           | .00055 | -.009  | .00037 | 7.33  | .37     |       |        |       |     |     |
| rs2390669   | 2   | 169091942  | A/C    | Prev               | 1    | .868  | -.005  | .47    | 1    | .817       | -.007 | .73   | 1                | .709 | -.003 | .87         | 1    | .894 | -.036 | .38   | 1    | .813      | .004  | .97   | -.006           | .36    | .00    | .96    | .00   | .93     |       |        |       |     |     |
| rs20429695  | 2   | 1765958366 | T/C    | Prev               | 1    | .769  | -.008  | .14    | 1    | .648       | .001  | .97   | 1                | .454 | .006  | .69         | 1    | .475 | .013  | .6    | 1    | .528      | .013  | .83   | -.005           | .3     | .00    | .81    | .00   | .55     |       |        |       |     |     |
| rs6433857   | 2   | 181517996  | C/T    | Prev               | .97  | .394  | .005   | .32    | .94  | .477       | .001  | .96   | .99              | .594 | .029  | .07         | .94  | .350 | -.028 | .31   | .97  | .464      | .013  | .85   | .006            | .21    | .00    | .44    | .00   | .49     |       |        |       |     |     |
| rs1528435   | 2   | 181550962  | C/T    | Prev               | 1    | .377  | -.010  | .042   | .99  | .356       | -.029 | .067  | 1                | .339 | -.038 | .025        | .99  | .389 | .021  | .43   | .99  | .337      | -.087 | .21   | -.013           | .0039  | 37.09  | .17    | .00   | .49     |       |        |       |     |     |
| rs7588437   | 2   | 181575281  | G/A    | Prev               | .99  | .636  | .012   | .013   | .98  | .712       | -.034 | .047  | .99              | .735 | .058  | .0014       | .98  | .789 | .021  | .5    | .99  | .704      | .099  | .17   | -.017           | .00014 | 51.52  | .083   | .00   | .41     |       |        |       |     |     |
| rs11679338  | 2   | 181606895  | C/T    | Prev               | 1    | .333  | -.018  | .00044 | 1    | .311       | -.039 | .018  | 1                | .259 | -.066 | .00026      | .99  | .282 | .023  | .42   | .98  | .282      | -.091 | .22   | -.022           | 2.2e-6 | 63.87  | .026   | -.020 | 2.4e-11 | 55.44 | .047   |       |     |     |
| rs13424740  | 2   | 188083123  | T/C    | Prev               | .99  | .522  | .006   | .24    | .99  | .538       | -.034 | .03   | .99              | .756 | .006  | .73         | .98  | .287 | .017  | .55   | .97  | .404      | .032  | .65   | -.008           | .059   | .00    | .52    | .00   | .62     |       |        |       |     |     |
| rs1569135   | 2   | 188115398  | A/G    | Prev               | 1    | .524  | .005   | .28    | 1    | .546       | .032  | .04   | 1                | .756 | .007  | .69         | 1    | .401 | .011  | .65   | 1    | .423      | .010  | .89   | .008            | .082   | .00    | .6     | .00   | .69     | .69   |        |       |     |     |
| rs13404250  | 2   | 188116196  | C/T    | Prev               | .99  | .661  | .006   | .22    | .99  | .720       | .042  | .013  | .99              | .825 | -.017 | .41         | .99  | .762 | .004  | .88   | .99  | .633      | .083  | .22   | .008            | .083   | 41.81  | .14    | .00   | .000011 | 31.22 | .2     |       |     |     |
| rs17406900  | 2   | 2037854202 | C/G    | Prev               | .98  | .449  | -.004  | .35    | 1    | .544       | -.009 | .54   | .97              | .647 | -.009 | .6          | .99  | .741 | .052  | .071  | .98  | .359      | -.022 | .74   | -.004           | .37    | 1.35   | .4     | -.013 | 1.1e-5  | -.010 | 5.2e-5 | 30.40 | .21 |     |
| rs7569376   | 2   | 205385322  | T/C    | Prev               | .99  | .213  | .009   | .12    | .99  | .205       | .000  | .99   | .98              | .465 | .026  | .098        | .99  | .520 | -.003 | .91   | .99  | .298      | .012  | .87   | .010            | .059   | .00    | .81    | .00   | .84     | .84   |        |       |     |     |
| rs972540    | 2   | 207244783  | A/G    | Prev               | 1    | .733  | -.017  | .0017  | 1    | .797       | -.042 | .029  | .99              | .807 | -.023 | .26         | .99  | .827 | .000  | 1     | .99  | .702      | .067  | .34   | -.018           | .00026 | .00    | .49    | .00   | .64     | .64   |        |       |     |     |
| rs13387838  | 2   | 207281447  | G/A    | Prev               | .99  | .980  | -.059  | .0005  | .79  | .998       | -.221 | .0058 | .52              | .998 | -.032 | .89         | .72  | .994 | -.008 | .96   | .99  | .996      | .090  | .85   | -.065           | 7.4e-5 | 25.59  | .26    | -.029 | .0025   | -.039 | 3.9e-6 | 46.72 | .11 |     |
| rs17200316  | 2   | 208265518  | A/G    | Prev               | .97  | .822  | -.014  | .023   | .91  | .851       | -.041 | .068  | .96              | .863 | -.030 | .2          | .92  | .946 | .038  | .52   | .89  | .822      | -.097 | .28   | -.017           | .0037  | .00    | .51    | .00   | .67     | .67   |        |       |     |     |
| rs11693226  | 2   | 208263279  | C/T    | Prev               | 1    | .785  | -.011  | .058   | 1    | .803       | -.059 | .0022 | 1                | .809 | -.036 | .82         | 1    | .875 | .081  | .035  | 1    | .767      | -.086 | .26   | -.013           | .015   | 68.88  | .012   | -.019 | 1e-7    | -.020 | 1.5e-9 | 63.85 | .00 | .16 |
| rs7421089   | 2   | 211988412  | A/G    | Prev               | .99  | .295  | .015   | .0037  | .98  | .259       | .023  | .2    | .98              | .189 | -.011 | .58         | .97  | .286 | .020  | .48   | .98  | .315      | -.128 | .068  | .014            | .0042  | 32.81  | .2     | .018  | 1.3e-5  | .016  | 2.2e-7 | 19.33 | .27 |     |
| rs18084180  | 2   | 211988980  | A/G    | Prev               | .99  | .295  | .015   | .0036  | .98  | .258       | .023  | .2    | .99              | .183 | -.009 | .65         | .97  | .285 | .020  | .49   | .99  | .312      | -.129 | .068  | .014            | .0037  | 31.28  | .21    | .018  | 1.6e-5  | .016  | 2.4e-7 | 21.93 | .29 |     |
| rs6435678   | 2   | 212710468  | G/C    | Prev               | .99  | .881  | -.005  | .47    | .99  | .896       | .006  | .83   | .95              | .954 | -.011 | .77         | .98  | .774 | -.000 | .99   | 1    | .896      | .044  | .69   | -.002           | .74    | -.003  | .5     | .00   | .98     | .98   |        |       |     |     |
| rs7599312   | 2   | 213413231  | G/A    | Prev               | .96  | .735  | .021   | 9.5e-5 | .93  | .786       | .005  | .8    | .95              | .955 | .068  | .08         | .89  | .621 | .010  | .71   | .91  | .827      | .034  | .71   | .020            | .92e-5 | .00    | .49    | .00   | .62     | .62   |        |       |     |     |
| rs4924000   | 2   | 219349752  | C/T    | Prev               | .98  | .423  | .011   | .028   | .97  | .398       | -.014 | .37   | .96              | .219 | -.007 | .74         | .98  | .531 | .017  | .51   | .97  | .312      | -.023 | .74   | .010            | .022   | .00    | .9     | .00   | .82     | .82   |        |       |     |     |
| rs4072096   | 2   | 227036003  | A/C    | Prev               | 1    | .329  | -.015  | .0012  | .99  | .495       | -.010 | .97   | 1                | .474 | -.009 | .57         | .99  | .335 | .008  | .77   | 1    | .523      | -.004 | .86   | -.013           | .0022  | .00    | .81    | .00   | .87     | .87   |        |       |     |     |
| rs21706040  | 2   | 227092802  | A/C    | Prev               | 1    | .356  | -.009  | .071   | 1    | .450       | -.009 | .39   | 1                | .091 | .030  | .26         | .99  | .302 | .009  | .75   | 1    | .259      | -.013 | .95   | -.014           | .004   | .00    | .95    | .00   | .93     | .93   |        |       |     |     |
| rs2972147   | 2   | 227098654  | T/C    | Prev               | .99  | .359  | .009   | .069   | 1    | .255       | .008  | .67   | 1                | .093 | .030  | .26         | .95  | .322 | .016  | .58   | .94  | .264      | -.021 | .78   | .010            | .038   | .00    | .94    | .00   | .93     | .93   |        |       |     |     |
| rs2943660   | 2   | 227103921  | T/C    | Prev               | .99  | .358  | .008   | .11    | .99  | .268       | .012  | .5    | .98              | .093 | .030  | .27         | .96  | .500 | .003  | .9    | .94  | .269      | -.027 | .72   | .009            | .062   | .00    | .92    | .00   | .92     | .92   |        |       |     |     |
| rs1515108   | 2   | 227123086  | C/T    | Prev               | .99  | .365  | .006   | .19    | .98  | .268       | .013  | .45   | 1                | .099 | .029  | .27         | .98  | .268 | -.062 | .38   | .99  | .268      | -.062 | .38   | .009            | .062   | .00    | .42    | .00   | .42     | .42   |        |       |     |     |
| rs2943668   | 2   | 227123084  | A/G    | Prev               | 1    | .358  | .005   | .31    | .99  | .250       | .020  | .26   | .99              | .097 | .029  | .28         | 1    | .313 | -.027 | .31   | .98  | .231      | -.099 | .18   | .005            | .24    | 17.59  | .3     | .013  | 5.4e-5  | .010  | 5.6e-5 | 23.17 | .26 |     |
| rs2673140   | 2   | 227159867  | G/A    | Prev               | .99  | .358  | .005   | .35    | .99  | .250       | .019  | .29   | .98              | .101 | .027  | .31         | .98  | .288 | -.048 | .082  | .99  | .230      | -.096 | .2    | .004            | .34    | .44    | .00    | .00   | .00     | .00   | .00    |       |     |     |
| rs10498218  | 2   | 228006255  | A/G    | Prev               | .63  | 1.000 | .360   | .04    | .86  | .998       | -.041 | .81   | .69              | .999 | .513  | .17         | .83  | .973 | -.072 | .4    | .039 | 1.000     | —     | 1     | .016            | .81    | 59.26  | .086   | .00   | .00     | .00   | .00    | .00   |     |     |
| rs2580821   | 2   | 232804155  | C/A    | Prev               | 1    | .911  | -.015  | .066   | 1    | .926       | -.032 | .27   | 1                | .990 | -.047 | .56         | 1    | .958 | -.053 | .4    | 1    | .919      | .002  | .98   | -.013           | .11    | .00    | .55    | .00   | .67     | .67   |        |       |     |     |
| rs3111612   | 2   | 232860077  | G/A    | Prev               | 1    | .088  | -.017  | .053   | 1    | .010       | -.082 | .31   | 1                | .035 | -.041 | .55         | 1    | .082 | -.007 | .96   | 1    | .082      | -.007 | .96   | .012            | .14    | 14.52  | .32    | .00   | .46     | .46   |        |       |     |     |
| rs6437061   | 2   | 233185052  | A/C    | Prev               | .94  | .576  | -.004  | .37    | .97  | .447       | -.001 | .94   | .91              | .178 | -.0   |             |      |      |       |       |      |           |       |       |                 |        |        |        |       |         |       |        |       |     |     |

| SNP        | Chr | Pos      | Allele | non-Hispanic white |      |      | Latino |        |      | East Asian |       |       | African American |      |       | South Asian |      |      | GERA  |       |     | GIANT EUR |       |      | GERA+GIANT Meta |         |       |       |       |         |       |         |       |       |      |
|------------|-----|----------|--------|--------------------|------|------|--------|--------|------|------------|-------|-------|------------------|------|-------|-------------|------|------|-------|-------|-----|-----------|-------|------|-----------------|---------|-------|-------|-------|---------|-------|---------|-------|-------|------|
|            |     |          |        | Info               | Freq | Eff  | P      | Info   | Freq | Eff        | P     | Info  | Freq             | Eff  | P     | Info        | Freq | Eff  | P     | Eff   | P   | Eff       | P     | Eff  | P               | Eff     | P     |       |       |         |       |         |       |       |      |
| rs4378999  | 3   | 51208646 | T/A    | Prev               | 1    | .110 | -.014  | .06    | .99  | .084       | -.022 | .42   | 1                | .063 | -.010 | .77         | .97  | .032 | -.071 | .21   | .98 | .070      | .138  | .29  | -.014           | .046    | .00   | .57   | -.017 | .0033   | -.016 | .00065  | .00   | .69   |      |
| rs10600330 | 3   | 52288946 | T/C    | Prev               | 1    | .494 | -.013  | .0047  | .98  | .521       | -.017 | .37   | .98              | .623 | -.010 | .46         | .96  | .336 | -.054 | .038  | 1   | .376      | .122  | .067 | -.014           | .014    | .014  | .3948 | .16   | -.005   | .094  | -.008   | .0013 | .4573 | .1   |
| rs6784615  | 3   | 52506426 | C/T    | Prev               | .87  | .059 | -.008  | .43    | .96  | .054       | -.007 | .83   | .98              | .021 | -.035 | .53         | .93  | .024 | .018  | .84   | .89 | .041      | -.045 | .79  | .008            | .43     | .00   | .97   | .012  | .089    | .011  | .003    | .00   | .48   |      |
| rs13303    | 3   | 52558008 | C/T    | Prev               | .91  | .440 | -.014  | .0041  | .99  | .393       | .001  | .97   | .91              | .552 | -.016 | .35         | .98  | .347 | -.056 | .036  | .87 | .649      | .038  | .59  | -.014           | .001    | .00   | .43   | -.011 | .00045  | -.011 | 3.6e-5  | .00   | .48   |      |
| rs12480528 | 3   | 52567014 | G/T    | Prev               | .91  | .440 | -.014  | .0041  | .99  | .424       | .007  | .64   | .91              | .562 | -.013 | .42         | .99  | .353 | -.048 | .063  | .85 | .717      | .079  | .33  | -.015           | .001    | .2124 | .28   | -.011 | .00045  | -.012 | 1.7e-6  | .96   | .35   |      |
| rs2590838  | 3   | 52622086 | G/A    | Prev               | .99  | .493 | -.015  | .0016  | .99  | .428       | .001  | .94   | .99              | .543 | -.014 | .36         | .99  | .369 | -.061 | .02   | .87 | .691      | .034  | .64  | -.014           | .00098  | .3303 | .2    | -.010 | .00024  | -.012 | 1.2e-6  | .2061 | .28   |      |
| rs2270824  | 3   | 52637486 | C/A    | Prev               | .94  | .455 | -.012  | .013   | .99  | .383       | .007  | .68   | .98              | .548 | -.015 | .36         | .95  | .278 | -.039 | .18   | .87 | .610      | .034  | .64  | -.012           | .0097   | .00   | .69   | -.010 | .00019  | -.011 | 5.2e-5  | .00   | .8    |      |
| rs13063798 | 3   | 52647257 | G/A    | Prev               | 1    | .502 | -.011  | .0026  | .99  | .435       | -.009 | .35   | 1                | .560 | -.017 | .28         | 1    | .484 | -.062 | .014  | 1   | .692      | .031  | .67  | -.012           | .001    | .2708 | .17   | -.011 | .00036  | -.012 | 4e-6    | .2522 | .25   |      |
| rs22829247 | 3   | 52727248 | G/A    | Prev               | 1    | .377 | -.011  | .0021  | .99  | .513       | -.003 | .85   | 1                | .588 | -.020 | .21         | 1    | .484 | -.062 | .014  | 1   | .723      | .028  | .43  | -.012           | .004    | .3288 | .27   | -.008 | .006    | -.010 | .0001   | .1533 | .33   |      |
| rs6617     | 3   | 52740182 | C/T    | Prev               | 1    | .378 | -.011  | .0024  | .99  | .512       | -.003 | .84   | 1                | .588 | -.020 | .21         | 1    | .484 | -.062 | .014  | 1   | .723      | .028  | .43  | -.012           | .004    | .3288 | .27   | -.008 | .006    | -.010 | .0001   | .1533 | .33   |      |
| rs11130319 | 3   | 52755092 | A/T    | Prev               | .98  | .594 | -.011  | .003   | .98  | .545       | -.003 | .83   | .99              | .589 | -.018 | .26         | .97  | .735 | -.071 | .017  | .96 | .737      | .028  | .43  | -.011           | .011    | .2049 | .28   | -.008 | .033    | -.009 | .0011   | .2080 | .28   |      |
| rs1029871  | 3   | 52797634 | G/C    | Prev               | 1    | .602 | -.012  | .012   | 1    | .354       | -.009 | .99   | .98              | .635 | -.016 | .33         | 1    | .348 | -.045 | .086  | .94 | .677      | .032  | .66  | -.012           | .0067   | .00   | .7    | -.010 | .00025  | -.013 | 2e-7    | .00   | .79   |      |
| rs2710323  | 3   | 52815905 | G/C    | Prev               | .97  | .313 | -.015  | .0026  | 1    | .444       | -.009 | .95   | .98              | .61  | -.021 | .2          | 1    | .348 | -.045 | .086  | .94 | .677      | .032  | .66  | -.012           | .0067   | .00   | .7    | -.010 | .00025  | -.013 | 2e-7    | .00   | .79   |      |
| rs2500149  | 3   | 52824921 | C/T    | Prev               | .99  | .618 | -.013  | .0052  | 1    | .352       | .004  | .82   | .97              | .654 | -.023 | .17         | .99  | .672 | -.059 | .031  | .94 | .771      | .031  | .53  | -.013           | .0026   | .1653 | .24   | -.011 | .00068  | -.012 | 6e-6    | .362  | .39   |      |
| rs2240950  | 3   | 52831009 | C/T    | Prev               | .95  | .648 | -.011  | .029   | .99  | .374       | -.001 | .97   | .94              | .662 | -.025 | .15         | .98  | .680 | -.059 | .031  | .86 | .766      | .086  | .24  | -.013           | .0043   | .00   | .35   | -.010 | .00075  | -.011 | 1.1e-6  | .894  | .36   |      |
| rs3617     | 3   | 52852605 | G/T    | Prev               | .94  | .531 | -.012  | .012   | 1    | .453       | -.025 | .14   | 1                | .602 | -.025 | .14         | 1    | .373 | -.031 | .26   | .79 | .606      | .088  | .24  | -.013           | .0043   | .00   | .35   | -.010 | .00075  | -.011 | 1.1e-6  | .894  | .36   |      |
| rs40687657 | 3   | 52852638 | C/T    | Prev               | .96  | .727 | -.012  | .032   | .99  | .622       | -.027 | .092  | .94              | .697 | -.040 | .022        | .99  | .704 | -.030 | .33   | .92 | .832      | .103  | .28  | -.016           | .001    | 1.41  | .4    | -.011 | .00071  | -.013 | 3e-5    | .00   | .47   |      |
| rs2535635  | 3   | 52859630 | G/G    | Prev               | .95  | .609 | -.012  | .016   | 1    | .495       | -.023 | .16   | .94              | .639 | -.039 | .022        | .99  | .704 | -.030 | .33   | .92 | .832      | .103  | .28  | -.016           | .001    | 1.41  | .4    | -.011 | .00071  | -.013 | 3e-5    | .00   | .47   |      |
| rs13076366 | 3   | 53747374 | C/A    | Prev               | .99  | .776 | -.018  | .0014  | .99  | .839       | -.012 | .36   | .98              | .886 | -.040 | .55         | .98  | .741 | -.031 | .29   | .98 | .910      | .196  | .085 | -.018           | .00086  | .00   | .41   | -.020 | .68e-6  | -.019 | 2.2e-8  | .00   | .35   |      |
| rs56384862 | 3   | 58399863 | A/G    | Prev               | 1    | .623 | -.019  | .0013  | 1    | .692       | -.017 | .32   | 1                | .974 | -.058 | .23         | 1    | .851 | -.008 | .83   | 1   | .792      | .104  | .17  | -.018           | 8e-5    | .00   | .5    | -.011 | .0042   | -.014 | 2.6e-6  | .49   | .41   |      |
| rs54579268 | 3   | 58410554 | C/T    | Prev               | .99  | .618 | -.019  | .0001  | .99  | .683       | -.017 | .3    | 1                | .973 | -.054 | .25         | .96  | .763 | -.034 | .27   | .98 | .789      | .093  | .13  | -.018           | .00013  | .2888 | .23   | -.010 | .00056  | -.013 | 5.5e-6  | .3061 | .21   |      |
| rs1916799  | 3   | 61232975 | G/A    | Prev               | .99  | .859 | -.017  | .016   | .99  | .891       | -.073 | .0033 | .99              | .887 | -.034 | .2          | .98  | .950 | -.002 | .97   | .99 | .799      | .145  | .008 | -.022           | .00037  | .4749 | .11   | -.018 | .00036  | .020  | 7.9e-7  | .3595 | .17   |      |
| rs2365389  | 3   | 61236462 | C/T    | Prev               | .99  | .594 | -.018  | .00021 | .99  | .439       | -.025 | .1    | .98              | .151 | -.019 | .39         | .98  | .244 | .081  | .0068 | .99 | .461      | .051  | .44  | -.020           | 6.2e-6  | .1435 | .32   | -.020 | 1.6e-10 | .020  | 3.4e-15 | .00   | .46   |      |
| rs9818550  | 3   | 61271329 | T/G    | Prev               | .99  | .737 | -.014  | .012   | .98  | .625       | -.031 | .048  | .99              | .475 | -.006 | .69         | .99  | .425 | .026  | .31   | .99 | .563      | .030  | .64  | -.014           | .0036   | .00   | .54   | -.013 | .0011   | -.014 | 1.2e-5  | .00   | .68   |      |
| rs9860730  | 3   | 64701146 | A/G    | Prev               | 1    | .675 | -.017  | .00056 | 1    | .448       | -.003 | .85   | 1                | .237 | -.021 | .23         | 1    | .250 | .018  | .54   | .99 | .287      | -.019 | .79  | -.012           | .0074   | .3962 | .16   | -.015 | 8.2e-6  | -.014 | 1.7e-7  | .2717 | .23   |      |
| rs4504165  | 3   | 64701890 | T/C    | Prev               | 1    | .676 | -.017  | .00057 | 1    | .448       | -.003 | .86   | .99              | .259 | -.021 | .25         | 1    | .252 | .015  | .61   | .98 | .298      | -.036 | .61  | -.012           | .0065   | .3736 | .17   | -.016 | 1.6e-5  | -.014 | 4.5e-7  | .2603 | .24   |      |
| rs4616635  | 3   | 64702275 | C/G    | Prev               | 1    | .695 | -.014  | .0054  | 1    | .741       | -.007 | .69   | 1                | .740 | .004  | .81         | 1    | .327 | .011  | .67   | 1   | .446      | .023  | .73  | -.011           | .013    | .00   | .71   | -.017 | 8.9e-7  | -.015 | 5.1e-8  | .00   | .7    |      |
| rs66818586 | 3   | 64703394 | G/T    | Prev               | 1    | .697 | -.014  | .0056  | 1    | .749       | -.008 | .67   | 1                | .743 | .004  | .85         | .99  | .458 | .006  | .83   | 1   | .447      | .013  | .84  | -.012           | .012    | .00   | .81   | -.016 | 4e-5    | -.014 | 1.8e-6  | .00   | .45   |      |
| rs6795735  | 3   | 64705365 | C/T    | Prev               | 1    | .563 | -.011  | .027   | 1    | .374       | -.006 | .71   | 1                | .256 | .015  | .39         | 1    | .258 | .015  | .62   | 1   | .267      | .064  | .38  | -.007           | .09     | .00   | .42   | -.012 | .00011  | -.011 | 3.1e-5  | .00   | .84   |      |
| rs2371767  | 3   | 64718258 | G/A    | Prev               | 1    | .697 | -.014  | .0048  | 1    | .773       | -.008 | .68   | 1                | .428 | .002  | .94         | 1    | .395 | .002  | .94   | 1   | .450      | -.007 | .92  | -.012           | .011    | .00   | .77   | -.013 | 4.8e-7  | -.016 | 2.6e-8  | .00   | .73   |      |
| rs7638389  | 3   | 64729892 | G/A    | Prev               | 1    | .265 | -.015  | .0052  | 1    | .311       | -.026 | .11   | 1                | .352 | -.008 | .21         | 1    | .395 | .002  | .94   | 1   | .450      | -.007 | .92  | -.012           | .011    | .00   | .77   | -.013 | 4.8e-7  | -.016 | 2.6e-8  | .00   | .73   |      |
| rs7628338  | 3   | 72432888 | C/T    | Prev               | 1    | .366 | -.007  | .14    | 1    | .370       | -.020 | .91   | .97              | .298 | -.023 | .2          | 1    | .555 | .004  | .86   | 1   | .352      | -.008 | .81  | -.004           | .32     | .2686 | .24   | -.009 | .028    | -.007 | .022    | 16.74 | .31   |      |
| rs12330322 | 3   | 72453555 | C/T    | Prev               | .99  | .785 | -.002  | .29    | .99  | .771       | -.020 | .99   | .99              | .756 | -.024 | .21         | .99  | .686 | .003  | .91   | .98 | .828      | -.018 | .13  | -.002           | .76     | .00   | .58   | -.014 | .00011  | -.010 | .0007   | 26.32 | .24   |      |
| rs6549455  | 3   | 72457221 | A/G    | Prev               | 1    | .363 | -.006  | .19    | .99  | .361       | -.009 | .57   | .99              | .261 | -.020 | .28         | .99  | .537 | .011  | .67   | .99 | .330      | .066  | .33  | -.005           | .27     | .00   | .42   | -.010 | .001    | -.008 | .008    | .00   | .56   |      |
| rs1840969  | 3   | 78830840 | T/A    | Prev               | 1    | .414 | -.001  | .89    | .99  | .481       | -.007 | .63   | .99              | .266 | -.031 | .079        | .99  | .487 | .009  | .73   | 1   | .467      | .047  | .47  | -.001           | .74     | .00   | .54   | -.010 | .001    | -.008 | .0031   | .6138 | .024  |      |
| rs349570   | 3   | 81792112 | C/A    | Prev               | .99  | .668 | -.009  | .068   | .97  | .651       | -.010 | .53   | 1                | .481 | -.024 | .13         | .98  | .539 | .006  | .8    | .98 | .613      | -.053 | .44  | -.006           | .18     | 47.23 | .11   | -.016 | 2.6e-8  | -.014 | 1.3e-7  | .4767 | .089  |      |
| rs6792696  | 3   | 81874009 | G/A    | Prev               | .99  | .666 | -.009  | .068   | .98  | .692       | -.003 | .85   | .99              | .535 | .019  | .23         | .95  | .717 | -.070 | .016  | .98 | .659      | .013  | .85  | -.008           | .08     | 47.23 | .11   | -.016 | 2.6e-8  | -.014 | 1.3e-7  | .4767 | .089  |      |
| rs6794880  | 3   | 84455172 | G/A    | Prev               | 1    | .147 | -.008  | .23    | 1    | .109       | -.037 | .13   | 1                | .030 | -.024 | .61         | .99  | .241 | -.028 | .34   | 1   | .467      | .047  | .47  | -.001           | .74     | .00   | .54   | -.010 | .001    | -.008 | .0031   | .6138 | .024  |      |
| rs62261676 | 3   | 85698577 | KP     | Prev               | .99  | .796 | .033   | 3e-8   | .99  | .831       | .061  | .0022 | 1                | .673 | .014  | .41         | .92  | .334 | .059  | .26   | .97 | .891      | .005  | .96  | -.033           | 5.6e-10 | .00   | .46   | -.015 | .0021   | -.012 | 8.7e-11 | .5372 | .055  |      |
| rs13078960 | 3   | 85807590 | T/C    | Prev               | .99  | .790 | -.017  | .0038  | .99  | .844       | -.056 | .0087 | .99              | .975 | -.034 | .49         | .98  | .927 | -.084 | .087  | 1   | .909      | -.214 | .049 | -.021           | .00014  | .5012 | .091  | -.020 | 1.7e-14 | -.027 | 3.6e-17 | .47   | .081  | .088 |
| rs13068138 | 3   | 85809425 | C/T    | Prev               | .99  | .790 | -.017  | .0038  | .99  | .844       | -.056 | .0088 | .99              | .975 | -.034 | .49         | .98  | .927 | -.084 | .087  | 1   | .909      | -.214 | .049 | -.021           | .00014  | .5012 | .091  | -.020 | 1.7e-14 | -.027 | 3.6e-17 | .47   | .081  | .088 |

| SNP        | Chr | Pos       | Allele | non-Hispanic white |      |      | Latino |         |      | East Asian |       |        | African American |      |       | South Asian |      |      | GERA  |       |       | GIANT EUR |       |      | GERA+GIANT Meta |         |       |         |       |         |       |         |       |      |     |
|------------|-----|-----------|--------|--------------------|------|------|--------|---------|------|------------|-------|--------|------------------|------|-------|-------------|------|------|-------|-------|-------|-----------|-------|------|-----------------|---------|-------|---------|-------|---------|-------|---------|-------|------|-----|
|            |     |           |        | Info               | Freq | Eff  | P      | Info    | Freq | Eff        | P     | Info   | Freq             | Eff  | P     | Info        | Freq | Eff  | P     | Eff   | P     | Eff       | P     | Eff  | P               | Het     | P     |         |       |         |       |         |       |      |     |
| rs2035935  | 3   | 141306013 | A/G    | Prev               | .99  | .936 | -.016  | .11     | 1    | .792       | .018  | .35    | 1                | .762 | .012  | .68         | .96  | .895 | .056  | .62   | -.011 | .16       | 13.53 | .33  | -.037           | 8.2e-9  | -.026 | 1.1e-7  | 55.83 | .045    |       |         |       |      |     |
| rs2295322  | 3   | 141326012 | T/C    | Prev               | 1    | .356 | -.015  | .12     | 1    | .790       | .018  | .34    | 1                | .99  | .007  | .94         | 1    | .899 | .009  | .94   | -.011 | .16       | .00   | .45  | -.041           | 2.8e-8  | -.027 | 5.4e-7  | 56.22 | .044    |       |         |       |      |     |
| rs1868637  | 3   | 150187634 | T/C    | Prev               | .99  | .366 | -.006  | .26     | .99  | .588       | -.008 | .07    | .99              | .332 | .047  | .985        | .98  | .475 | -.028 | .68   | -.002 | .71       | 48.48 | .1   | -.003           | .43     | -.002 | .4      | 36.04 | .17     |       |         |       |      |     |
| rs94438    | 3   | 154018887 | G/C    | Prev               | 1    | .599 | -.015  | .0021   | .99  | .588       | -.001 | .96    | 1                | .509 | -.007 | .64         | .98  | .637 | -.032 | .23   | -.004 | .016      | .00   | .8   | -.014           | .00023  | -.014 | 1.2e-6  | .00   | .9      |       |         |       |      |     |
| rs17451107 | 3   | 156797609 | T/C    | Prev               | .98  | .588 | -.006  | .26     | .99  | .582       | -.006 | .69    | .99              | .494 | .007  | .66         | .99  | .631 | .078  | .29   | -.004 | .41       | 16.56 | .31  | -.005           | .16     | -.004 | .11     | .00   | .44     |       |         |       |      |     |
| rs1482852  | 3   | 156798294 | A/G    | Prev               | .99  | .570 | .006   | .24     | .99  | .555       | -.006 | .7     | .99              | .379 | .008  | .63         | .99  | .486 | -.049 | .052  | .98   | .513      | .099  | .13  | .004            | .3      | .003  | .18     | 28.02 | .22     |       |         |       |      |     |
| rs2649734  | 3   | 157347640 | G/A    | Prev               | .99  | .371 | .009   | .082    | .98  | .391       | .030  | .062   | .99              | .289 | .001  | .94         | .98  | .350 | -.028 | .28   | .98   | .542      | .032  | .62  | .009            | .048    | .47   | .4      | .015  | 6.3e-5  |       |         |       |      |     |
| rs12493901 | 3   | 171922055 | G/A    | Prev               | .95  | .512 | -.001  | .89     | .97  | .544       | -.004 | .81    | .93              | .562 | .020  | .23         | .94  | .844 | .039  | .27   | .94   | .602      | .009  | .89  | -.001           | .78     | .00   | .61     | -.006 | .051    |       |         |       |      |     |
| rs13069244 | 3   | 180441172 | G/A    | Prev               | .97  | .924 | -.010  | .25     | .96  | .940       | -.003 | .92    | .72              | .991 | .017  | .86         | .91  | .973 | -.021 | .48   | -.010 | .26       | .00   | .68  | -.002           | 4.7e-6  | -.019 | 8.7e-5  | .00   | .54     |       |         |       |      |     |
| rs11546168 | 3   | 183976103 | C/T    | Prev               | 1    | .826 | .004   | .51     | .93  | .861       | -.020 | .39    | 1                | .927 | .010  | .74         | .82  | .947 | .124  | .047  | 1     | .874      | .081  | .41  | .001            | .019    | .008  | .023    | 19.82 | .28     |       |         |       |      |     |
| rs11545169 | 3   | 184020542 | C/T    | Prev               | .86  | .845 | .000   | .99     | 1    | .873       | -.020 | .38    | .89              | .962 | .045  | .31         | 1    | .957 | .178  | .0045 | .79   | .879      | .138  | .22  | .008            | .23     | .005  | .029    | 57.26 | .039    |       |         |       |      |     |
| rs2178403  | 3   | 184039666 | A/G    | Prev               | .8   | .255 | -.013  | .031    | .99  | .204       | .020  | .3     | .95              | .331 | .005  | .75         | .96  | .073 | .026  | .6    | .76   | .366      | .028  | .77  | .013            | .016    | .00   | .98     | .010  | .00019  |       |         |       |      |     |
| rs4680392  | 3   | 185524061 | A/G    | Prev               | 1    | .711 | .008   | .13     | 1    | .728       | -.016 | .36    | 1                | .744 | -.015 | .41         | 1    | .329 | -.048 | .071  | 1     | .629      | .007  | .92  | .003            | .55     | .40   | .056    | .15   | .010    | .01   |         |       |      |     |
| rs6809651  | 3   | 185814642 | G/A    | Prev               | 1    | .867 | .038   | 6e-8    | 1    | .903       | .027  | .4     | 1                | .940 | .015  | .65         | .97  | .813 | -.001 | .97   | .98   | .824      | .039  | .65  | -.035           | 9.4e-8  | .00   | .73     | .045  | 1e-21   | .041  | 1.4e-27 | .00   | .59  |     |
| rs1516725  | 3   | 185824004 | T/C    | Prev               | 1    | .134 | -.038  | 5e-8    | 1    | .060       | -.015 | .66    | .98              | .167 | -.006 | .87         | 1    | .173 | -.026 | .76   | .034  | 5.1e-8    | .00   | .84  | -.045           | 1.9e-22 | -.042 | 7.3e-27 | .00   | .71     | .08   |         |       |      |     |
| rs73052033 | 3   | 185828465 | T/C    | Prev               | 1    | .818 | .039   | 4.3e-11 | 1    | .869       | .041  | .073   | 1                | .895 | .092  | .025        | 1    | .791 | .003  | .97   | .039  | 1.8e-11   | .00   | .65  | -.039           | 3.2e-17 | -.039 | 3.7e-27 | .00   | .78     | .15   |         |       |      |     |
| rs70647305 | 3   | 185834290 | T/C    | Prev               | .98  | .213 | -.041  | 4.2e-12 | .99  | .182       | -.037 | .06    | .96              | .077 | .003  | .93         | .95  | .384 | .028  | .31   | .97   | .245      | .028  | .72  | -.036           | 2.3e-20 | -.036 | 7.2e-31 | 37.76 | .15     | .08   |         |       |      |     |
| rs9816226  | 3   | 185834499 | A/T    | Prev               | .99  | .183 | -.038  | 1.1e-9  | .99  | .136       | -.042 | .063   | .95              | .062 | -.016 | .64         | .94  | .204 | -.014 | .67   | .97   | .211      | .005  | .95  | -.036           | 2.8e-10 | .00   | .87     | -.039 | 1.9e-30 | .00   | .92     |       |      |     |
| rs7684221  | 4   | 17957354  | G/A    | Prev               | 1    | .831 | -.001  | .87     | 1    | .823       | .007  | .73    | 1                | .859 | .015  | .51         | .96  | .621 | -.030 | .24   | 1     | .742      | .004  | .96  | -.001           | .89     | .00   | .97     | -.000 | .92     | .00   | .86     |       |      |     |
| rs34811474 | 4   | 25408838  | G/A    | Prev               | .99  | .774 | .036   | 4.2e-10 | 1    | .857       | -.087 | 8.6e-5 | .99              | .986 | -.050 | .47         | .76  | .936 | .098  | .093  | 1     | .936      | .070  | .58  | -.039           | 1.4e-12 | 48.74 | .099    | .00   | .00     | .00   | .86     |       |      |     |
| rs16992623 | 4   | 36813105  | C/T    | Prev               | .97  | .838 | .022   | .00064  | .96  | .840       | -.044 | .039   | .98              | .558 | -.008 | .62         | 1    | .866 | .032  | .39   | .96   | .739      | .011  | .88  | -.014           | .016    | 64.09 | .025    | .017  | 2.9e-5  | .016  | 1.7e-6  | 55.99 | .045 |     |
| rs1996023  | 4   | 45164637  | T/G    | Prev               | .97  | .568 | .016   | .0014   | .97  | .557       | .014  | .36    | .93              | .328 | .039  | .026        | .94  | .601 | .055  | .037  | .92   | .672      | -.044 | .55  | -.018           | 5.4e-5  | 8.55  | .36     | -.028 | 2e-19   | -.025 | 1.5e-22 | 37.02 | .16  |     |
| rs13130484 | 4   | 45175691  | C/T    | Prev               | 1    | .568 | -.029  | 1.5e-9  | 1    | .611       | -.026 | .092   | 1                | .721 | -.023 | .19         | 1    | .749 | -.070 | .016  | 1     | .583      | -.073 | .26  | -.030           | 4.2e-38 | -.037 | 2.4e-47 | 22.93 | .03     | .26   | .02     |       |      |     |
| rs16858082 | 4   | 45175804  | T/C    | Prev               | .99  | .568 | .017   | .00048  | .99  | .556       | .016  | .3     | .99              | .339 | .032  | .053        | .97  | .589 | .052  | .046  | .98   | .695      | -.040 | .59  | -.028           | 1.2e-19 | -.025 | 4.4e-23 | 18.84 | .29     | .00   | .63     |       |      |     |
| rs35478252 | 4   | 45177546  | AC/A   | Prev               | .99  | .569 | -.029  | 1.3e-9  | 1    | .721       | -.023 | .19    | 1                | .749 | -.071 | .015        | .99  | .585 | -.070 | .28   | 1     | .584      | -.066 | .31  | -.030           | 1.3e-11 | .00   | .63     | -.030 | 1.3e-11 | .00   | .63     | .00   |      |     |
| rs12641981 | 4   | 45179883  | C/T    | Prev               | 1    | .568 | -.029  | 1.1e-9  | 1    | .611       | -.025 | .1     | 1                | .754 | -.073 | .012        | 1    | .584 | -.066 | .31   | 1     | .584      | -.066 | .31  | -.030           | 1.2e-11 | .00   | .6      | -.040 | 9.8e-38 | -.036 | 3.9e-47 | 22.39 | .27  |     |
| rs12607026 | 4   | 45181334  | A/T    | Prev               | 1    | .567 | -.029  | 1.5e-9  | 1    | .721       | -.023 | .19    | 1                | .721 | -.023 | .19         | 1    | .748 | -.068 | .02   | 1     | .585      | -.069 | .29  | -.029           | 1.2e-11 | .00   | .68     | -.038 | 2.3e-26 | -.035 | 9.2e-36 | .00   | .45  |     |
| rs10038397 | 4   | 45182527  | A/G    | Prev               | 1    | .567 | -.029  | 1.5e-9  | 1    | .611       | -.028 | .076   | 1                | .720 | -.023 | .19         | 1    | .748 | -.068 | .02   | 1     | .586      | -.072 | .27  | -.030           | 1.4e-11 | .00   | .68     | -.037 | 1.4e-47 | 19.64 | .29     | .00   |      |     |
| rs348495   | 4   | 45184452  | G/A    | Prev               | .99  | .584 | .018   | .00024  | .99  | .540       | .019  | .22    | 1                | .336 | .030  | .066        | .98  | .330 | .062  | .02   | .99   | .686      | -.037 | .6   | -.020           | 6.7e-6  | .00   | .45     | -.028 | 4.8e-19 | .025  | 2e-23   | 18.24 | .3   |     |
| rs10038398 | 4   | 45186139  | G/A    | Prev               | .99  | .570 | -.029  | 9.4e-10 | .99  | .612       | -.028 | .077   | .99              | .723 | -.022 | .21         | .99  | .747 | -.062 | .035  | .99   | .588      | -.067 | .31  | -.030           | 1.2e-11 | .00   | .79     | -.035 | 1e-35   | .00   | .58     | .00   |      |     |
| rs13132420 | 4   | 56392813  | G/A    | Prev               | 1    | .632 | -.007  | .14     | 1    | .570       | -.007 | .67    | 1                | .450 | .001  | .94         | 1    | .787 | -.011 | .72   | 1     | .573      | -.078 | .23  | -.007           | .12     | .00   | .83     | -.002 | .5      | .00   | .57     | .00   |      |     |
| rs3805389  | 4   | 56482750  | G/A    | Prev               | 1    | .748 | .006   | .26     | .99  | .791       | -.007 | .9     | .99              | .887 | .007  | .77         | .97  | .837 | -.062 | .073  | .99   | .753      | .074  | .31  | .004            | .42     | 21.20 | .28     | .009  | .0066   | .008  | .0065   | 13.75 | .33  |     |
| rs16848284 | 4   | 73476901  | T/C    | Prev               | .99  | .553 | .001   | .89     | .96  | .607       | -.001 | .95    | .93              | .468 | -.024 | .14         | .98  | .701 | -.021 | .45   | .96   | .442      | .069  | .27  | -.001           | .74     | .00   | .43     | .005  | .11     | .003  | .27     | 4.76  | .39  |     |
| rs7697556  | 4   | 73515313  | T/C    | Prev               | .99  | .473 | -.002  | .65     | 1    | .436       | -.001 | .95    | .93              | .544 | .018  | .28         | 1    | .772 | -.003 | .93   | .99   | .611      | -.066 | .3   | -.001           | .83     | .00   | .66     | -.004 | .19     | -.003 | .24     | .00   | .74  |     |
| rs17001654 | 4   | 77129568  | C/G    | Prev               | .94  | .836 | -.007  | .29     | .94  | .795       | .015  | .44    | .86              | .973 | -.030 | .57         | 1    | .825 | -.023 | .51   | .99   | .894      | -.041 | .7   | -.006           | .34     | .00   | .78     | -.031 | 7.8e-9  | -.020 | 6.1e-7  | 54.99 | .049 |     |
| rs2198271  | 4   | 82149031  | C/T    | Prev               | 1    | .742 | -.002  | .78     | 1    | .720       | -.005 | .82    | 1                | .824 | .000  | .99         | 1    | .382 | -.049 | .062  | 1     | .752      | .025  | .74  | -.003           | .5      | .00   | .51     | .002  | .67     | -.000 | .95     | .00   | .56  |     |
| rs9091328  | 4   | 89713121  | C/T    | Prev               | .99  | .517 | .006   | .22     | .99  | .497       | .011  | .48    | 1                | .343 | .008  | .61         | .99  | .416 | -.003 | .91   | .99   | .434      | -.017 | .79  | .006            | .16     | .00   | .98     | -.007 | .017    | .007  | .0062   | .00   | .99  |     |
| rs1307325  | 4   | 103188709 | G/T    | Prev               | 1    | .325 | -.032  | 1.2e-8  | 1    | .949       | -.086 | .014   | 1                | .395 | -.244 | .038        | .84  | .377 | -.131 | .16   | 1     | .391      | -.139 | .65  | -.055           | 1.8e-10 | 28.09 | .24     | -.048 | 1.8e-12 | -.051 | 3.2e-21 | 14.32 | .33  |     |
| rs12037308 | 4   | 106617136 | G/A    | Prev               | 1    | .323 | -.003  | .7      | 1    | .929       | .020  | .51    | 1                | .94  | .004  | .331        | .48  | .99  | .044  | -.018 | .77   | .98       | .327  | .163 | .18             | -.002   | .79   | .00     | .58   | -.001   | .97   | -.001   | .89   | .00  | .71 |
| rs4833407  | 4   | 113311790 | C/A    | Prev               | .99  | .352 | -.005  | .29     | .99  | .447       | -.028 | .068   | 1                | .335 | -.001 | .97         | .96  | .381 | -.030 | .25   | .99   | .470      | -.021 | .73  | -.007           | .089    | .00   | .66     | -.016 | 2.5e-5  | -.012 | 1.8e-5  | 3.54  | .39  |     |
| rs4834272  | 4   | 113313986 | T/C    | Prev               | .97  | .671 | -.007  | .19     | .97  | .565       | -.026 | .095   | .94              | .735 | -.006 | .85         | .96  | .603 | .051  | .44   | 1     | .408      | .081  | .00  | -.001           | 1.6e-6  | .00   | .69     | -.012 | 3.7e-5  | -.012 | 1.6e-5  | .00   | .68  |     |
| rs3749591  | 4   | 120214030 | T/G    | Prev               | 1    | .680 | -.010  | .05     | 1    | .704       | -.012 | .22    | 1                | .630 | -.037 | .022        | 1    | .851 | -.034 | .34   | 1     | .791      | .093  | .24  | -.013           | .0068   | 14.30 | .32     | -.010 | .012    | -.011 | .00025  | .00   | .44  |     |
| rs303084   | 4   | 124066948 | G/A    | Prev               | .99  | .219 | .007   | .2      | .98  | .268       | -.022 | .42    | .99              | .038 | -.034 | .42         | .99  | .579 | -.036 | .16   | .99   | .261      | .122  | .099 | .007            | .2      | 42.17 | .14     | .013  | .00072  | .011  | .00046  | 35.85 | .17  |     |
| rs11947381 | 4   | 145537850 | T/C    | Prev               | 1    | .471 | -.007  | .1      |      |            |       |        |                  |      |       |             |      |      |       |       |       |           |       |      |                 |         |       |         |       |         |       |         |       |      |     |

| SNP        | Chr | Pos       | Allele | non-Hispanic white |      |      | Latino |        |      | East Asian |       |        | African American |      |       | South Asian |      |      | GERA  |       |       | GIANT EUR |       |      | GERA+GIANT Meta |         |       |        |       |         |       |         |       |        |       |     |
|------------|-----|-----------|--------|--------------------|------|------|--------|--------|------|------------|-------|--------|------------------|------|-------|-------------|------|------|-------|-------|-------|-----------|-------|------|-----------------|---------|-------|--------|-------|---------|-------|---------|-------|--------|-------|-----|
|            |     |           |        | Info               | Freq | Eff  | P      | Info   | Freq | Eff        | P     | Info   | Freq             | Eff  | P     | Info        | Freq | Eff  | P     | Eff   | $I^2$ | Het       | P     | Eff  | P               | $I^2$   | Het   | P      |       |         |       |         |       |        |       |     |
| rs6881648  | 5   | 74991840  | A/C    | Prev               | .99  | .623 | .028   | 1.3e-8 | .99  | .640       | .022  | .18    | .99              | .449 | .053  | .00084      | .99  | .507 | -.010 | .7    | .99   | .432      | .026  | .7   | .028            | 1.8e-10 | 18.57 | .3     | .025  | 1.7e-11 | .026  | 2.2e-20 | 5.27  | .38    |       |     |
| rs2307111  | 5   | 75003678  | T/C    | Prev               | 1    | .393 | .027   | 9e-8   | .99  | .591       | .025  | .11    | 1                | .446 | .056  | .00051      | 1    | .177 | .015  | .64   | 1     | .400      | .003  | .96  | .028            | 3.8e-11 | .00   | .5     | .028  | 3.8e-12 | .025  | 2.2e-20 | .00   | .32    |       |     |
| rs23074091 | 5   | 75010002  | T/C    | Prev               | 1    | .631 | .029   | 9e-9   | .99  | .644       | .020  | .21    | .98              | .442 | .049  | .00031      | .98  | .444 | -.003 | .96   | .98   | .444      | -.003 | .96  | .029            | 1.4e-10 | .00   | .48    | .025  | 9.9e-12 | .027  | 9.6e-21 | .00   | .38    |       |     |
| rs2112347  | 5   | 75013244  | C/T    | Prev               | .99  | .632 | .029   | 5.7e-9 | .99  | .646       | .022  | .18    | .99              | .448 | .053  | .00095      | .97  | .436 | -.012 | .64   | .97   | .445      | .006  | .93  | .029            | 1e-10   | 22.17 | .27    | .026  | 6.4e-17 | .027  | 3.4e-19 | 7.04  | .37    |       |     |
| rs7713806  | 5   | 75034387  | C/T    | Prev               | .98  | .620 | .025   | 5.8e-7 | .96  | .609       | .014  | .39    | .97              | .315 | .041  | .01         | .94  | .240 | .025  | .41   | .94   | .341      | -.051 | .64  | .025            | 2.6e-8  | .00   | .7     | .022  | 3.7e-12 | .023  | 4.4e-19 | .00   | .77    |       |     |
| rs2069664  | 5   | 75916434  | G/A    | Prev               | 1    | .337 | -.020  | .93    | 1    | .669       | -.005 | .75    | 1                | .845 | -.059 | .0067       | 1    | .666 | -.091 | .18   | 1     | .666      | -.091 | .18  | -.003           | .5      | 55.14 | .003   | -.001 | .83     | -.002 | .35     | 44.83 | .11    |       |     |
| rs6870983  | 5   | 76976333  | C/T    | Prev               | .99  | .763 | .024   | 1.7e-5 | .99  | .803       | .007  | .7     | .98              | .981 | .050  | .38         | .99  | .372 | .054  | .037  | .99   | .645      | -.004 | .96  | .024            | 4e-6    | .00   | .65    | .018  | 4.2e-7  | .020  | 8.7e-12 | .00   | .66    |       |     |
| rs18463974 | 5   | 87969927  | G/A    | Prev               | .99  | .860 | -.031  | 7.2e-6 | .98  | .822       | -.008 | .73    | .97              | .517 | -.003 | .84         | .99  | .783 | -.015 | .65   | .98   | .792      | -.089 | .26  | -.025           | 2.5e-5  | 1.42  | .4     | -.017 | .00007  | -.021 | 1e-7    | .00   | .42    |       |     |
| rs16903285 | 5   | 87978252  | T/C    | Prev               | .98  | .858 | -.032  | 3.3e-6 | .97  | .822       | -.007 | .73    | .97              | .537 | -.004 | .81         | .96  | .787 | -.015 | .65   | .96   | .799      | -.089 | .26  | -.026           | 1.4e-5  | 6.47  | .37    | -.021 | .00019  | -.023 | 1.2e-8  | .00   | .46    |       |     |
| rs7713337  | 5   | 88746025  | T/C    | Prev               | 1    | .356 | -.002  | .64    | .99  | .391       | -.012 | .42    | 1                | .278 | -.016 | .34         | .97  | .209 | .039  | .23   | 1     | .475      | .010  | .88  | -.001           | .8      | .00   | .54    | -.001 | .88     | -.001 | .79     | .00   | .68    |       |     |
| rs6235     | 5   | 95728898  | A/G    | Prev               | 1    | .712 | -.015  | .0048  | 1    | .753       | .022  | .22    | 1                | .699 | -.025 | .14         | 1    | .733 | .019  | .51   | 1     | .719      | .148  | .036 | -.011           | .017    | 62.70 | .03    | -.017 | 6.5e-7  | -.015 | 4.2e-8  | 57.20 | .00    | .639  |     |
| rs6234     | 5   | 95728898  | G/C    | Prev               | 1    | .729 | -.016  | .0023  | 1    | .766       | .030  | .1     | 1                | .701 | -.026 | .13         | 1    | .832 | -.016 | .25   | 1     | .720      | .128  | .068 | -.013           | .0069   | 61.62 | .034   | -.018 | 1.1e-5  | -.016 | 3.4e-7  | 55.06 | .00    | .64   |     |
| rs6234     | 5   | 95728897  | G/C    | Prev               | 1    | .729 | -.017  | .0015  | 1    | .765       | .027  | .15    | 1                | .702 | -.026 | .12         | 1    | .794 | -.036 | .65   | 1     | .717      | .125  | .074 | -.014           | .0029   | 60.57 | .038   | -.017 | 1.3e-7  | .017  | 3.7e-7  | 52.58 | .00    | .661  |     |
| rs261967   | 5   | 95850250  | A/G    | Prev               | 1    | .592 | -.018  | .00014 | 1    | .593       | -.030 | .056   | .99              | .555 | .005  | .75         | .99  | .601 | -.006 | .83   | .99   | .583      | -.080 | .21  | -.017           | 6.1e-5  | .00   | .43    | -.018 | 4.1e-6  | -.017 | 1e-9    | .00   | .58    |       |     |
| rs4869139  | 5   | 95858668  | G/A    | Prev               | .99  | .610 | .016   | .0013  | 1    | .620       | .022  | .17    | .99              | .455 | .003  | .87         | .97  | .624 | .041  | .12   | .98   | .528      | .021  | .74  | .016            | .0003   | .00   | .78    | .015  | 1.6e-6  | -.015 | 1.6e-6  | .00   | .88    |       |     |
| rs10062657 | 5   | 95867908  | C/T    | Prev               | .96  | .100 | .022   | .0064  | .97  | .256       | .032  | .071   | .94              | .425 | .005  | .7          | .96  | .361 | -.001 | .97   | .93   | .214      | .145  | .072 | -.020           | .0018   | 7.70  | .36    | -.015 | .012    | .017  | 7.5e-5  | .00   | .88    |       |     |
| rs30187    | 5   | 96124330  | T/C    | Prev               | 1    | .352 | -.017  | .00049 | 1    | .393       | .016  | .3     | 1                | .508 | .006  | .7          | 1    | .381 | -.077 | .0027 | 1     | .426      | .171  | .01  | -.014           | .0022   | 79.62 | .00059 | -.009 | .02     | -.011 | .00016  | 75.20 | .00    | .012  |     |
| rs40067    | 5   | 107439012 | G/A    | Prev               | .99  | .831 | .022   | .00063 | .98  | .857       | .012  | .59    | .99              | .639 | -.028 | .091        | .97  | .810 | .008  | .8    | .98   | .580      | .166  | .012 | .016            | .0045   | 69.47 | .011   | .024  | 7.4e-6  | .020  | 2e-7    | 67.84 | .00    | .014  |     |
| rs158186   | 5   | 107440856 | G/A    | Prev               | .99  | .831 | .022   | .00059 | .98  | .857       | .010  | .64    | .99              | .637 | -.029 | .079        | .97  | .797 | .008  | .8    | .98   | .580      | .166  | .012 | .016            | .0049   | 70.45 | .0089  | .026  | 6.3e-6  | .020  | 2.4e-7  | 67.11 | .00    | .0095 |     |
| rs10041657 | 5   | 108152428 | G/A    | Prev               | 1    | .770 | .004   | .53    | .99  | .811       | -.037 | .059   | 1                | .909 | -.018 | .5          | .98  | .708 | -.031 | .26   | 1     | .833      | .012  | .89  | -.004           | .46     | 21.94 | .27    | .005  | .14     | -.005 | .098    | 3.54  | .39    | .81   |     |
| rs1045706  | 5   | 108714298 | T/C    | Prev               | 1    | .412 | -.011  | .024   | 1    | .488       | -.018 | .23    | 1                | .903 | -.041 | .1          | 1    | .801 | -.018 | .57   | 1     | .419      | .029  | .65  | -.012           | .0056   | .00   | .74    | -.009 | .017    | -.010 | .0003   | .00   | .81    |       |     |
| rs459552   | 5   | 112176756 | T/A    | Prev               | .97  | .239 | .002   | .77    | .98  | .192       | .020  | .31    | .89              | .098 | .001  | .98         | .94  | .071 | .017  | .73   | .95   | .223      | .010  | .9   | -.003           | .55     | .00   | .93    | -.017 | 1.2e-5  | .012  | 8.3e-5  | 5.53  | .38    |       |     |
| rs10435241 | 5   | 118729286 | C/T    | Prev               | 1    | .723 | -.004  | .4     | 1    | .730       | .002  | .9     | 1                | .846 | .024  | .27         | 1    | .654 | .042  | .11   | 1     | .762      | .058  | .46  | -.001           | .87     | 18.93 | .29    | -.001 | .79     | -.001 | .76     | .00   | .42    |       |     |
| rs4308481  | 5   | 12652106  | C/T    | Prev               | .95  | .542 | .015   | .0023  | .92  | .525       | -.059 | .00025 | .92              | .470 | .038  | .024        | .9   | .484 | -.009 | .72   | .89   | .401      | -.057 | .41  | .019            | 2.1e-5  | 61.93 | .033   | -.012 | .0011   | .015  | 1.7e-7  | 58.57 | .00    | .034  |     |
| rs1582931  | 5   | 126657199 | G/A    | Prev               | .99  | .531 | .014   | .003   | .97  | .506       | .054  | .00063 | .98              | .436 | .043  | .00089      | .95  | .454 | -.016 | .55   | .97   | .378      | -.060 | .37  | .018            | 3.1e-5  | 64.01 | .025   | .013  | .00057  | .015  | 9.3e-8  | 57.83 | .00    | .037  |     |
| rs10051787 | 5   | 127732236 | T/C    | Prev               | .98  | .292 | .019   | .00038 | .98  | .314       | .031  | .062   | .98              | .420 | .044  | .0071       | .96  | .220 | -.009 | .78   | .96   | .350      | -.049 | .47  | .021            | 1e-5    | 11.38 | .34    | .011  | .0063   | .015  | 7.4e-7  | 27.41 | .00    | .83   |     |
| rs4357030  | 5   | 124316031 | C/T    | Prev               | 1    | .226 | -.005  | .38    | 1    | .195       | .004  | .84    | 1                | .426 | .002  | .91         | 1    | .396 | -.020 | .43   | 1     | .181      | .063  | .45  | -.004           | .42     | .00   | .85    | -.010 | .032    | -.007 | .034    | .00   | .83    |       |     |
| rs8646049  | 5   | 124330522 | A/G    | Prev               | .98  | .470 | -.011  | .017   | .98  | .355       | -.009 | .54    | .93              | .319 | -.002 | .93         | .95  | .216 | -.000 | .99   | .97   | .396      | -.051 | .45  | -.010           | .021    | .00   | .89    | -.016 | 3.6e-7  | -.014 | 3.8e-8  | .00   | .82    |       |     |
| rs4836133  | 5   | 124332103 | C/A    | Prev               | .99  | .477 | -.012  | .011   | 1    | .425       | -.009 | .54    | .93              | .319 | -.002 | .93         | 1    | .244 | -.020 | .49   | .96   | .415      | -.052 | .44  | -.012           | .0077   | .00   | .94    | -.015 | 7.2e-6  | -.010 | 3.5e-7  | .00   | .84    |       |     |
| rs272869   | 5   | 131677997 | A/G    | Prev               | 1    | .381 | .009   | .075   | 1    | .345       | .012  | .46    | 1                | .630 | -.032 | .053        | 1    | .266 | -.058 | .042  | 1     | .647      | .086  | .21  | .005            | .29     | 66.79 | .017   | .005  | .14     | -.005 | .068    | 58.49 | .00    | .56   |     |
| rs3299120  | 5   | 133861756 | C/T    | Prev               | .97  | .565 | .014   | .0045  | .98  | .482       | -.015 | .35    | .97              | .617 | .007  | .68         | .98  | .502 | -.012 | .64   | .96   | .608      | -.003 | .96  | .010            | .02     | .00   | .42    | .010  | .02     | .010  | .00067  | -.017 | 9.7e-6 | .00   | .43 |
| rs13174863 | 5   | 139080745 | A/G    | Prev               | .72  | .850 | -.019  | .017   | .91  | .860       | -.030 | .2     | .65              | .931 | .008  | .84         | .83  | .929 | -.108 | .048  | .54   | .902      | -.188 | .21  | -.021           | .044    | 11.97 | .34    | -.010 | .00067  | -.017 | 9.7e-6  | .00   | .42    |       |     |
| rs155610   | 5   | 135517178 | C/G    | Prev               | .99  | .448 | .017   | .00035 | .99  | .596       | .029  | .067   | .99              | .923 | .022  | .45         | .99  | .927 | .067  | .011  | .98   | .508      | .086  | .18  | .020            | 7.4e-6  | 18.47 | .3     | .020  | 6.5e-8  | .020  | 2.2e-12 | .00   | .43    |       |     |
| rs7715256  | 5   | 135537893 | G/T    | Prev               | 1    | .433 | .016   | .00076 | .99  | .576       | .023  | .13    | .99              | .921 | .015  | .6          | .96  | .393 | .031  | .24   | .98   | .482      | .114  | .077 | .018            | 7.9e-5  | .00   | .6     | .016  | 1.7e-7  | .017  | 4.9e-10 | .00   | .73    |       |     |
| rs7708584  | 5   | 135343466 | A/G    | Prev               | 1    | .432 | .016   | .00081 | .99  | .570       | .022  | .15    | .99              | .922 | .015  | .6          | .96  | .393 | .031  | .24   | .98   | .482      | .114  | .077 | .018            | 7.9e-5  | .00   | .65    | .019  | 3.8e-7  | .017  | 1.9e-10 | .00   | .77    |       |     |
| rs11058460 | 5   | 135354602 | G/A    | Prev               | .91  | .474 | .015   | .0032  | .99  | .593       | .017  | .29    | .93              | .921 | .017  | .56         | .91  | .474 | .033  | .22   | .88   | .506      | .151  | .026 | .016            | .00048  | 9.86  | .35    | .016  | 6e-6    | .016  | 1.1e-8  | .00   | .49    |       |     |
| rs17472426 | 5   | 135694357 | T/G    | Prev               | .95  | .916 | -.002  | .85    | .95  | .931       | -.043 | .17    | .77              | .992 | .010  | .92         | .9   | .972 | .089  | .27   | .71   | .978      | .076  | .78  | -.006           | .51     | .00   | .59    | .044  | .56     | .000  | .93     | .00   | .62    |       |     |
| rs4688125  | 5   | 171281875 | C/G    | Prev               | .88  | .406 | .007   | .2     | .87  | .353       | .023  | .2     | .91              | .363 | .013  | .44         | .95  | .422 | .021  | .44   | .85   | .243      | -.027 | .74  | -.009           | .067    | .00   | .87    | .006  | .007    | .0089 | .00     | .92   |        |       |     |
| rs4688126  | 5   | 171281875 | T/G    | Prev               | 1    | .395 | .004   | .44    | 1    | .362       | .012  | .48    | 1                | .362 | .012  | .48         | 1    | .607 | .043  | .1    | .41   | .372      | .315  | .099 | -.007           | .75     | 1.14  | .4     | .000  | .1      | -.007 | .75     | 1.14  | .4     |       |     |
| rs12513649 | 5   | 172472052 | G/G    | Prev               | .37  | .992 | .003   | .95    | 1    | .944       | .009  | .79    | .77              | .929 | -.033 | .34         | .42  | .995 | -.175 | .51   | .41   | .372      | .315  | .099 | -.007           | .75     | 1.14  | .4     | .000  | .1      | -.007 | .75     | 1.14  | .4     |       |     |
| rs3849724  | 5   | 173290977 | G/T    | Prev               | .99  | .384 | .012   | .011   | .99  | .683       | .007  | .69    | 1                | .774 | .041  | .03         | .96  | .771 | -.025 | .4    | .97   | .691      | .110  | .13  | .008            | .057    | 62.48 | .031   | .01   |         |       |         |       |        |       |     |



| SNP        | Chr | Pos      | Allele | non-Hispanic white |      |       | Latino |        |      | East Asian |       |      | African American |      |       | South Asian |      |      | GERA  |      |      | GIANT EUR |       |       | GERA+GIANT Meta |        |       |      |       |         |        |         |        |        |       |       |     |
|------------|-----|----------|--------|--------------------|------|-------|--------|--------|------|------------|-------|------|------------------|------|-------|-------------|------|------|-------|------|------|-----------|-------|-------|-----------------|--------|-------|------|-------|---------|--------|---------|--------|--------|-------|-------|-----|
|            |     |          |        | Info               | Freq | Eff   | P      | Info   | Freq | Eff        | P     | Info | Freq             | Eff  | P     | Info        | Freq | Eff  | P     | Eff  | P    | Eff       | P     | Eff   | P               | Eff    | P     |      |       |         |        |         |        |        |       |       |     |
| rs798489   | 7   | 2801803  | G/T    | Prev               | .92  | .751  | -.002  | .77    | .94  | .784       | .020  | .3   | .85              | .845 | .052  | .028        | .91  | .925 | -.020 | .69  | .89  | .894      | .047  | .68   | .003            | .63    | .34   | .07  | .19   | .002    | .49    | .002    | .39    | 17.60  | .3    |       |     |
| rs1830074  | 7   | 7618674  | T/C    | Prev               | .93  | -.721 | -.010  | .061   | .96  | .689       | -.025 | .14  | .89              | .706 | -.047 | .035        | .1   | .93  | .033  | .020 | .47  | .93       | .036  | -.007 | .93             | -.006  | .19   | .63  | .82   | .026    | -.018  | 1.81e-5 | -.013  | 2.7e-5 | 65.60 | .017  |     |
| rs9648211  | 7   | 16089752 | A/G    | Prev               | 1    | .378  | -.011  | .027   | 1    | .524       | -.015 | .34  | 1                | .299 | -.004 | .031        | 1    | .783 | .001  | .97  | 1    | .406      | -.031 | .64   | -.013           | .0043  | .00   | .67  | -.001 | .81     | .007   | -.001   | .81    | .006   | .04   | 21.39 | .27 |
| rs2214442  | 7   | 20392787 | A/G    | Prev               | .99  | .534  | -.003  | .49    | .99  | .410       | -.018 | .25  | 1                | .638 | .006  | .7          | .99  | .376 | -.047 | .079 | .97  | .304      | .066  | .35   | .004            | .41    | 23.77 | .26  | .005  | .21     | .004   | .14     | 5.90   | .38    |       |       |     |
| rs4721902  | 7   | 20420151 | T/C    | Prev               | .98  | .591  | -.004  | .37    | .98  | .519       | -.022 | .16  | .98              | .625 | .036  | .027        | .97  | .500 | -.035 | .18  | .97  | .495      | -.000 | 1     | .007            | .12    | 42.63 | .14  | .002  | .65     | .004   | .17     | 35.66  | .17    |       |       |     |
| rs10231365 | 7   | 20431585 | C/T    | Prev               | .99  | .491  | -.005  | .31    | .98  | .379       | .023  | .15  | .98              | .412 | .027  | .091        | .96  | .359 | -.056 | .037 | .99  | .290      | .023  | .75   | .006            | .15    | 52.05 | .08  | .005  | .16     | .006   | .045    | 40.31  | .14    |       |       |     |
| rs4141278  | 7   | 25857525 | T/C    | Prev               | .97  | .816  | .013   | .031   | .97  | .807       | .031  | .12  | 1                | .596 | .017  | .3          | .93  | .933 | .011  | .83  | .94  | .621      | -.001 | .99   | .013            | .0065  | .00   | .94  | .002  | .61     | .006   | .047    | .00    | .48    |       |       |     |
| rs10245353 | 7   | 25858614 | C/A    | Prev               | .97  | .815  | .013   | .034   | .97  | .807       | .031  | .12  | .99              | .597 | .016  | .32         | .93  | .932 | -.002 | .97  | .95  | .621      | -.001 | .99   | .013            | .0081  | .00   | .93  | .002  | .59     | .006   | .049    | .00    | .51    |       |       |     |
| rs7798431  | 7   | 25860812 | G/A    | Prev               | .99  | .757  | .012   | .028   | .98  | .579       | .020  | .21  | .98              | .579 | .020  | .21         | .99  | .636 | .028  | .37  | .98  | .554      | .051  | .43   | .016            | .0001  | .00   | .67  | .000  | .91     | .005   | .058    | 41.55  | .13    |       |       |     |
| rs39092751 | 7   | 25861639 | G/A    | Prev               | .98  | .751  | .013   | .023   | .99  | .661       | .029  | .079 | .98              | .593 | .008  | .76         | .97  | .532 | .070  | .28  | .015 | .0051     | .00   | .78   | .000            | .003   | .00   | .78  | .000  | .93     | .005   | .076    | 32.42  | .19    |       |       |     |
| rs1055144  | 7   | 25871109 | C/T    | Prev               | 1    | .815  | .012   | .042   | 1    | .601       | .025  | .13  | 1                | .932 | .007  | .89         | 1    | .932 | .007  | .89  | 1    | .932      | .007  | .89   | .015            | .0051  | .00   | .86  | .002  | .63     | .006   | .044    | 6.01   | .38    |       |       |     |
| rs6958350  | 7   | 25871933 | C/T    | Prev               | 1    | .750  | .013   | .022   | 1    | .655       | .027  | .098 | 1                | .205 | .023  | .23         | 1    | .499 | .037  | .14  | 1    | .523      | .064  | .31   | .016            | .0013  | .00   | .68  | .000  | .91     | .006   | .05     | 43.16  | .12    |       |       |     |
| rs10261878 | 7   | 25950545 | A/C    | Prev               | .98  | .064  | -.023  | .02    | .98  | .079       | .002  | .96  | .98              | .044 | -.007 | .86         | .99  | .523 | .001  | .97  | .96  | .059      | -.010 | .95   | -.017           | .044   | .00   | .85  | -.023 | .0047   | -.020  | .00508  | .00    | .9     |       |       |     |
| rs1534696  | 7   | 26397239 | C/A    | Prev               | 1    | .448  | -.001  | .79    | .92  | .432       | .027  | .1   | 1                | .219 | .013  | .5          | .93  | .335 | .032  | .24  | 1    | .406      | .158  | .02   | .003            | .49    | 57.54 | .051 | .002  | .38     | .47    | .17     | .092   |        |       |       |     |
| rs7801581  | 7   | 27223771 | C/A    | Prev               | .76  | .757  | .012   | .071   | .96  | .747       | .000  | .66  | .63              | .950 | .031  | .49         | .94  | .747 | .000  | .95  | .66  | .715      | .010  | .91   | .010            | .47    | .57   | .006 | .07   | .000    | .47    | .007    | .00    | .87    |       |       |     |
| rs849140   | 7   | 28183702 | T/C    | Prev               | 1    | .398  | -.014  | .003   | 1    | .402       | -.016 | .3   | 1                | .299 | -.002 | .9          | .99  | .462 | .021  | .43  | 1    | .511      | .050  | .44   | -.012           | .0047  | .00   | .54  | -.009 | .0049   | -.010  | 7.8e-5  | .00    | .61    |       |       |     |
| rs1708299  | 7   | 28188946 | A/G    | Prev               | 1    | .287  | -.011  | .041   | 1    | .204       | -.016 | .31  | 1                | .035 | -.018 | .68         | .99  | .127 | .016  | .68  | 1    | .222      | .078  | .35   | -.010           | .037   | .00   | .79  | -.009 | .011    | -.009  | .001    | .00    | .88    |       |       |     |
| rs552707   | 7   | 28205303 | T/C    | Prev               | 1    | .281  | -.010  | .052   | 1    | .203       | -.020 | .31  | .98              | .035 | -.024 | .57         | .97  | .140 | .008  | .83  | .99  | .222      | .078  | .35   | -.010           | .037   | .00   | .79  | -.010 | .0035   | -.010  | .00034  | .00    | .89    |       |       |     |
| rs481806   | 7   | 28207300 | G/T    | Prev               | .99  | .285  | -.010  | .059   | .99  | .208       | -.020 | .3   | .98              | .035 | -.026 | .55         | .97  | .143 | .015  | .69  | .99  | .229      | .065  | .43   | -.010           | .043   | .00   | .8   | -.010 | .0032   | -.010  | .00039  | .00    | .89    |       |       |     |
| rs17161076 | 7   | 32239565 | A/G    | Prev               | 1    | .782  | -.026  | 7.5e-6 | 1    | .785       | -.005 | .81  | 1                | .790 | .030  | .13         | 1    | .682 | -.008 | .76  | 1    | .837      | -.025 | .78   | -.020           | .00016 | 52.46 | .078 | -.019 | 1.7e-8  | 40.58  | .13     |        |        |       |       |     |
| rs215607   | 7   | 32338337 | G/A    | Prev               | .99  | .224  | .026   | 4.9e-6 | .99  | .199       | .007  | .71  | .99              | .213 | .003  | .87         | .98  | .279 | .072  | .01  | .99  | .220      | .084  | .27   | -.024           | 2.2e-6 | 36.72 | .18  | .023  | 2e-5    | .024   | 2e-10   | 21.70  | .27    |       |       |     |
| rs7779181  | 7   | 32345283 | T/C    | Prev               | 1    | .776  | -.025  | 8.5e-6 | 1    | .807       | -.002 | .94  | .98              | .782 | .008  | .68         | 1    | .758 | -.072 | .014 | 1    | .782      | -.089 | .26   | -.023           | 8.6e-6 | 46.18 | .11  | -.019 | 1e-9    | 36.39  | .16     |        |        |       |       |     |
| rs10269783 | 7   | 49616203 | G/A    | Prev               | .98  | .605  | -.008  | .09    | .98  | .588       | -.018 | .26  | .98              | .425 | -.035 | .033        | .94  | .746 | .007  | .81  | .98  | .518      | .063  | .33   | -.010           | .02    | 6.68  | .37  | -.014 | 4.1e-6  | -.013  | 2.7e-7  | .00    | .43    |       |       |     |
| rs11765748 | 7   | 50615616 | T/A    | Prev               | 1    | .478  | .012   | .014   | 1    | .540       | .014  | .37  | .99              | .584 | .013  | .43         | .99  | .658 | .038  | .16  | .99  | .652      | -.046 | .5    | .012            | .004   | .00   | .8   | .016  | 2e-5    | .014   | 3.2e-7  | .00    | .85    |       |       |     |
| rs4947644  | 7   | 50618876 | T/C    | Prev               | 1    | .494  | .010   | .031   | 1    | .455       | -.001 | .94  | 1                | .520 | .017  | .28         | 1    | .684 | .047  | .087 | 1    | .632      | .001  | .99   | .011            | .012   | .00   | .64  | .013  | .00049  | -.012  | 1.9e-5  | .00    | .75    |       |       |     |
| rs6947395  | 7   | 69406661 | A/T    | Prev               | .99  | .833  | -.017  | .0072  | .99  | .865       | -.012 | .6   | 1                | .807 | -.051 | .01         | .98  | .722 | .044  | .12  | .99  | .850      | .067  | .46   | -.015           | .008   | 60.20 | .04  | -.010 | .034    | -.012  | .00085  | 52.22  | .063   |       |       |     |
| rs1949804  | 7   | 69768826 | T/C    | Prev               | 1    | .954  | -.025  | .029   | .98  | .951       | .035  | .33  | .98              | .881 | -.068 | .0052       | 1    | .911 | -.016 | .72  | 1    | .933      | .100  | .44   | -.026           | .0067  | 42.48 | .14  | -.026 | .0019   | -.026  | 3.8e-5  | 28.10  | .22    |       |       |     |
| rs38314    | 7   | 70067315 | G/A    | Prev               | 1    | .514  | .003   | .57    | 1    | .634       | .002  | .9   | 1                | .819 | .003  | .89         | 1    | .555 | .016  | .54  | 1    | .714      | .014  | .85   | -.003           | .49    | .00   | .99  | .014  | .00028  | -.009  | .0014   | .00    | .59    |       |       |     |
| rs6976930  | 7   | 72885810 | G/A    | Prev               | 1    | .816  | -.013  | .028   | 1    | .858       | -.035 | .12  | 1                | .906 | -.009 | .75         | 1    | .664 | .015  | .58  | 1    | .876      | .010  | .92   | -.013           | .018   | .00   | .72  | -.009 | .017    | -.011  | .00089  | .00    | .79    |       |       |     |
| rs1167827  | 7   | 75163169 | A/G    | Prev               | .92  | .445  | -.017  | .00078 | .96  | .567       | -.002 | .88  | .83              | .878 | -.031 | .23         | .8   | .220 | -.001 | .99  | .89  | .474      | -.050 | .47   | -.016           | .00661 | .00   | .86  | -.020 | 6.3e-10 | -.019  | 3.1e-12 | .00    | .83    |       |       |     |
| rs73144267 | 7   | 76552745 | T/C    | Prev               | .77  | .836  | -.017  | .019   | .98  | .692       | -.012 | .51  | 1                | .82  | .648  | -.025       | .17  | .66  | .738  | .041 | .25  | .73       | .680  | .037  | .63             | -.016  | .011  | .00  | .56   | -.021   | 1.1e-5 | -.019   | 5.2e-7 | .00    | .63   |       |     |
| rs7804790  | 7   | 76680753 | C/T    | Prev               | .72  | .176  | .014   | .064   | .9   | .288       | .018  | .31  | .73              | .337 | .051  | .0087       | .72  | .99  | .086  | .091 | .82  | .902      | .018  | .82   | .019            | .0024  | 20.36 | .28  | .021  | 9.9e-6  | .020   | 8.4e-8  | 1.11   | .41    |       |       |     |
| rs9245368  | 7   | 76680143 | C/T    | Prev               | .64  | .186  | .017   | .024   | .92  | .315       | .017  | .32  | .67              | .490 | .013  | .5          | .82  | .177 | .013  | .72  | .59  | .337      | -.019 | .83   | .016            | .011   | .00   | .99  | .032  | 3.2e-8  | .025   | 5e-9    | .00    | .64    |       |       |     |
| rs2430307  | 7   | 76690941 | T/C    | Prev               | .64  | .186  | .017   | .025   | .92  | .315       | .016  | .34  | .67              | .490 | .013  | .5          | .82  | .177 | .011  | .76  | .58  | .337      | -.019 | .83   | .016            | .012   | .00   | .99  | .036  | 2.5e-7  | .025   | 8.4e-8  | .00    | .49    |       |       |     |
| rs6955651  | 7   | 76639871 | T/C    | Prev               | .57  | .302  | .015   | .035   | .73  | .414       | .019  | .29  | .57              | .469 | .034  | .11         | .63  | .175 | .066  | .12  | .51  | .412      | .043  | .64   | .018            | .0033  | .00   | .7   | .041  | 1.3e-7  | .027   | 2.5e-8  | 34.06  | .18    |       |       |     |
| rs3930017  | 7   | 76720582 | A/G    | Prev               | .95  | .411  | -.000  | .99    | .73  | .282       | .011  | .59  | .93              | .132 | .001  | .98         | .62  | .298 | -.028 | .43  | .95  | .238      | -.155 | .041  | -.001           | .91    | 21.30 | .28  | -.015 | 1.5e-6  | .013   | 2.4e-7  | 63.34  | .018   |       |       |     |
| rs3770273  | 7   | 77288040 | G/A    | Prev               | .99  | .590  | .010   | .045   | .99  | .601       | .021  | .18  | 1                | .539 | -.002 | .92         | .99  | .623 | .019  | .47  | 1    | .470      | -.112 | .079  | .009            | .032   | 16.92 | .31  | .015  | 1.5e-6  | .013   | 2.4e-7  | 14.63  | .32    |       |       |     |
| rs42377    | 7   | 92243672 | G/A    | Prev               | 1    | .685  | .004   | .42    | 1    | .705       | -.008 | .62  | 1                | .832 | .000  | .99         | 1    | .600 | -.010 | .71  | 1    | .833      | .217  | .014  | .003            | .5     | 40.08 | .15  | .003  | .48     | .003   | .33     | 25.11  | .25    |       |       |     |
| rs10269774 | 7   | 92253972 | G/A    | Prev               | 1    | .650  | .001   | .89    | 1    | .612       | -.003 | .84  | 1                | .872 | .008  | .73         | 1    | .599 | -.002 | .94  | 1    | .812      | .200  | .013  | .001            | .8     | 35.79 | .18  | .004  | .38     | .003   | .41     | 21.55  | .27    |       |       |     |
| rs2327570  | 7   | 93095867 | T/C    | Prev               | 1    | .518  | -.011  | .021   | 1    | .530       | -.021 | .19  | 1                | .605 | -.030 | .062        | .99  | .710 | .028  | .33  | 1    | .532      | -.033 | .6    | -.012           | .0047  | .00   | .45  | -.017 | 4.3e-6  | -.015  | 9.8e-8  | .00    | .69    |       |       |     |
| rs2301680  | 7   | 93116290 | A/G    | Prev               | 1    | .499  | -.009  | .05    | 1    | .654       | -.022 | .15  | 1                | .921 | .013  | .45         | 1    | .405 | .016  | .53  | .99  | .439      | .012  | .86   | -.016           | .024   | .00   | .77  | -.016 | 9.3e-6  | -.014  | 1.3e-6  | .00    | .47    |       |       |     |
| rs9641123  | 7   | 93197732 | G/C    | Prev               | .99  | .591  | -.011  | .02    | .99  | .687       | -.018 | .28  | .99              | .703 | .008  | .65         | .98  | .881 | .000  | 1    | .99  | .610      | -.089 | .18   | -.012           | .0083  | .00   | .81  | -.019 | .5e-    |        |         |        |        |       |       |     |

| SNP          | Chr | Pos       | Allele | non-Hispanic white |      |       | Latino |        |      | East Asian |       |       | African American |       |       | South Asian |      |      | GERA  |      |      | GIANT EUR |         |       | GERA+GIANT Meta |        |         |         |        |         |        |         |     |      |      |
|--------------|-----|-----------|--------|--------------------|------|-------|--------|--------|------|------------|-------|-------|------------------|-------|-------|-------------|------|------|-------|------|------|-----------|---------|-------|-----------------|--------|---------|---------|--------|---------|--------|---------|-----|------|------|
|              |     |           |        | Info               | Freq | Eff   | P      | Info   | Freq | Eff        | P     | Info  | Freq             | Eff   | P     | Info        | Freq | Eff  | P     | Eff  | P    | Eff       | P       | Eff   | P               | Eff    | P       |         |        |         |        |         |     |      |      |
| rs125440058  | 8   | 72492238  | T/G    | Prev               | .99  | .936  | .003   | .73    | 1    | .588       | .022  | .17   | .98              | .842  | -.045 | .2          | .99  | .858 | .171  | .066 | .011 | .15       | .4741   | .11   | -.012           | .037   | -.003   | .49     | .62    | .82     | .02    |         |     |      |      |
| rs1260739536 | 8   | 72514228  | T/G    | Prev               | 1    | .752  | .021   | .018   | .99  | .579       | .011  | .47   | .98              | .286  | -.001 | .93         | .99  | .430 | .083  | .009 | .1   | .320      | .053    | .42   | .013            | .0078  | .005    | .725    | .21    | .23     | .27    |         |     |      |      |
| rs7435692    | 8   | 76013663  | A/G    | Prev               | .99  | .585  | .021   | 1.2e-5 | .98  | .498       | .020  | .2    | .97              | .435  | .081  | .0013       | .99  | .416 | -.036 | .57  | .024 | .33e-8    | .4736   | .11   | .024            | .33e-8 | .005    | .07e-17 | .34    | .49     | .18    |         |     |      |      |
| rs286857369  | 8   | 760697034 | T/C    | Prev               | 1    | .786  | .018   | .0023  | .99  | .747       | -.055 | .0028 | .99              | .743  | -.063 | .0029       | .99  | .819 | -.030 | .77  | .023 | 1.1e-5    | .3218   | .21   | .023            | .0032  | -.017   | .38e-7  | .38    | .50     | .15    |         |     |      |      |
| rs2877341    | 8   | 76277925  | T/C    | KP                 | .99  | .303  | -.029  | 1.9e-8 | .97  | .99        | .420  | -.050 | .0019            | .94   | .085  | -.002       | .97  | .98  | .535  | .062 | .36  | -.030     | 1.1e-10 | .00   | .43             | -.026  | .43e-10 | .00     | .49    | .00     | .49    |         |     |      |      |
| rs174036819  | 8   | 768060584 | T/C    | Prev               | 1    | .698  | .027   | 1.2e-7 | .99  | .707       | .029  | .094  | 1                | .581  | .052  | .0013       | .98  | .917 | .008  | .86  | .96  | .064      | -.062   | .36   | .029            | .7e-10 | .025    | .92e-20 | .8     | .16     | .36    |         |     |      |      |
| rs13815600   | 8   | 76873699  | A/G    | Prev               | .98  | .505  | .024   | 6e-7   | .98  | .222       | .037  | .052  | .94              | .142  | .022  | .35         | .96  | .400 | -.022 | .74  | .023 | 1.7e-7    | .00     | .73   | .021            | .38e-8 | .022    | .34e-10 | .00    | .83     | .00    |         |     |      |      |
| rs160017521  | 8   | 81375457  | C/T    | Prev               | .99  | .892  | .020   | .0081  | .98  | .918       | -.016 | .38   | .96              | .802  | .045  | .024        | .91  | .921 | .045  | .36  | .97  | .795      | .140    | .096  | .022            | .0011  | .2539   | .129    | .12e-9 | .29     | .66    | .21     |     |      |      |
| rs1438420    | 8   | 81438420  | C/T    | Prev               | .99  | .750  | .017   | .0025  | .98  | .762       | .008  | .66   | .99              | .721  | .026  | .15         | .97  | .332 | .008  | .77  | .99  | .685      | .113    | .12   | .017            | .00066 | .007    | .12e-6  | .00    | .48     | .81    |         |     |      |      |
| rs733594     | 8   | 85077686  | C/T    | Prev               | .98  | .273  | -.017  | .0021  | .98  | .279       | -.003 | .68   | .94              | .374  | -.000 | .98         | .98  | .481 | -.054 | .033 | .96  | .262      | -.014   | .86   | -.016           | .001   | .00     | .00     | .48    | .00     | .61    |         |     |      |      |
| rs2033732    | 8   | 850797328 | A/G    | Prev               | .98  | .250  | -.012  | .031   | .98  | .233       | -.007 | .67   | .94              | .364  | -.003 | .85         | .94  | .138 | -.008 | .83  | .95  | .246      | -.010   | .89   | -.011           | .036   | .00     | .00     | .97    | .00     | .77    |         |     |      |      |
| rs4366055    | 8   | 95507328  | A/G    | Prev               | .99  | .751  | .016   | .0039  | .99  | .607       | .017  | .29   | .99              | .530  | -.019 | .22         | .99  | .693 | .025  | .37  | .98  | .699      | .071    | .32   | .012            | .014   | .00055  | .013    | .28e-5 | .29     | .44    | .15     |     |      |      |
| rs13680842   | 8   | 95582606  | A/G    | Prev               | .97  | .674  | .006   | .27    | .98  | .569       | .016  | .29   | .97              | .522  | -.024 | .13         | 1    | .834 | -.016 | .63  | .96  | .647      | .064    | .37   | .004            | .38    | 1.7e-5  | .011    | .68e-5 | .37     | .75    | .21     |     |      |      |
| rs3134353    | 8   | 101947455 | A/G    | Prev               | 1    | .390  | -.009  | .058   | 1    | .368       | -.019 | .23   | .98              | .359  | -.010 | .53         | .98  | .232 | -.041 | .18  | 1    | .290      | -.064   | .37   | -.011           | .011   | .00     | .76     | -.015  | 1e-6    | .00    | .69     |     |      |      |
| rs38602177   | 8   | 118185025 | G/A    | Prev               | 1    | .695  | -.001  | .9     | 1    | .735       | -.018 | .29   | 1                | .556  | -.019 | .25         | 1    | .888 | .002  | .95  | 1    | .775      | -.145   | .056  | -.001           | .78    | .3382   | .2      | -.010  | .0042   | -.007  | .013    | .35 | .51  |      |
| rs2001945    | 8   | 126477978 | C/T    | Prev               | 1    | .485  | -.007  | .14    | 1    | .510       | -.029 | .06   | 1                | .460  | -.001 | .95         | 1    | .222 | -.061 | .043 | 1    | .537      | .017    | .8    | -.009           | .031   | .2383   | .26     | -.009  | .00033  | .5     | .14     | .38 |      |      |
| rs378854     | 8   | 128323819 | C/T    | Prev               | .99  | .645  | -.002  | .69    | 1    | .644       | -.004 | .08   | .8               | .99   | .597  | -.039       | .014 | .98  | .779  | .007 | .81  | .98       | .585    | .082  | .21             | -.004  | .32     | .41     | .15    | -.004   | .32    | .00     | .44 |      |      |
| rs6470765    | 8   | 130736697 | A/G    | Prev               | 1    | .801  | -.004  | .51    | 1    | .658       | -.012 | .45   | 1                | .304  | -.045 | .0094       | 1    | .365 | .005  | .84  | 1    | .599      | .006    | .93   | -.008           | .12    | .2550   | .25     | -.005  | .24     | .00    | .93     |     |      |      |
| rs148076010  | 9   | 2277605   | A/G    | Prev               | .76  | .959  | .008   | .56    | .71  | .976       | -.156 | .0086 | .57              | .995  | -.333 | .024        | .71  | .991 | .119  | .44  | 6    | .976      | -.344   | .21   | -.003           | .82    | .7239   | .0059   | -.000  | .98     | -.001  | .88     | .65 | .013 |      |
| rs7042428    | 9   | 8262414   | A/G    | Prev               | .94  | .981  | .007   | .71    | .91  | .982       | .026  | .67   | .86              | .999  | .257  | .32         | .92  | .938 | .071  | .19  | .77  | .998      | 1.368   | .14   | .015            | .36    | .00     | .54     | -.009  | .47     | -.000  | .99     | .00 | .48  |      |
| rs4741510    | 9   | 15591372  | T/A    | Prev               | .99  | .578  | .015   | .0022  | .94  | .578       | .015  | .93   | 1                | .417  | -.006 | .7          | .93  | .876 | -.018 | .64  | .99  | .595      | .053    | .43   | .012            | .0066  | .00     | .55     | .016   | .23e-5  | .00    | .62     |     |      |      |
| rs4740619    | 9   | 15634326  | T/C    | Prev               | .99  | .544  | .015   | .0021  | .98  | .415       | -.011 | .47   | .99              | .251  | -.002 | .92         | .95  | .534 | .011  | .68  | .96  | .468      | .045    | .5    | .012            | .0069  | .00     | .5      | .018   | .46e-9  | .00    | .46     |     |      |      |
| rs1539172    | 9   | 15784631  | A/G    | Prev               | 1    | .508  | -.008  | .11    | 1    | .610       | -.009 | .56   | 1                | .628  | -.003 | .84         | 1    | .461 | .001  | .95  | 1    | .427      | -.043   | .52   | -.007           | .086   | .00     | .97     | .013   | .00054  | .00    | .93     |     |      |      |
| rs10968577   | 9   | 15888706  | G/A    | KP                 | .99  | .134  | .037   | 1.2e-7 | .99  | .118       | .016  | .51   | .99              | .042  | .048  | .23         | .98  | .295 | .025  | .37  | .99  | .074      | .024    | .84   | .035            | .5e-8  | .00     | .92     | .014   | .023    | .42e-8 | .28     | .33 | .22  |      |
| rs7020996    | 9   | 22129579  | C/T    | Prev               | 1    | .865  | .009   | .19    | 1    | .857       | .010  | .52   | 1                | .645  | .010  | .52         | 1    | .667 | -.008 | .76  | 1    | .879      | -.051   | .6    | .007            | .25    | .00     | .85     | -.004  | .44     | -.001  | .89     | .00 | .62  |      |
| rs10811661   | 9   | 22134094  | T/C    | Prev               | 1    | .824  | .010   | .11    | 1    | .850       | -.036 | .094  | 1                | .607  | .011  | .51         | 1    | .925 | -.026 | .59  | 1    | .856      | -.043   | .63   | .006            | .26    | .2082   | .28     | -.004  | .33     | .42    | .60     | .12 |      |      |
| rs1934100    | 9   | 23234308  | A/T    | Prev               | .95  | .685  | .008   | .14    | .93  | .672       | .002  | .9    | .92              | .833  | -.009 | .68         | .94  | .296 | -.027 | .34  | .92  | .573      | .015    | .83   | .005            | .26    | .00     | .73     | .008   | .077    | .007   | .038    | .00 | .83  |      |
| rs10811901   | 9   | 23236935  | G/A    | Prev               | 1    | .435  | -.010  | .042   | .99  | .382       | .009  | .59   | .99              | .192  | -.009 | .67         | .98  | .710 | -.018 | .54  | 1    | .414      | .009    | .88   | -.008           | .056   | .00     | .85     | .010   | .0019   | .00    | .92     | .00 |      |      |
| rs2183924    | 9   | 28412078  | C/T    | Prev               | 1    | .687  | .029   | 1.2e-8 | .99  | .733       | -.008 | .67   | .99              | .737  | .013  | .47         | .98  | .710 | -.018 | .52  | .99  | .723      | .027    | .71   | .026            | 1.9e-8 | .00     | .71     | .025   | .68e-14 | -.025  | .68e-21 | .00 | .82  |      |
| rs10968576   | 9   | 28414339  | A/G    | Prev               | 1    | .691  | .029   | 3e-8   | 1    | .746       | .014  | .43   | 1                | .830  | -.016 | .44         | 1    | .815 | -.014 | .65  | 1    | .778      | -.019   | .82   | -.027           | 2.4e-8 | .00     | .9      | .025   | .64e-14 | -.025  | .64e-21 | .00 | .95  |      |
| rs10968577   | 9   | 28415512  | C/T    | Prev               | 1    | .688  | -.030  | 6e-9   | 1    | .739       | -.010 | .57   | 1                | .728  | -.014 | .42         | .99  | .022 | .003  | .92  | .99  | .725      | .029    | .68   | -.027           | 1.3e-8 | .00     | .61     | .025   | .53e-12 | -.026  | .42e-19 | .00 | .74  |      |
| rs16938312   | 9   | 36969205  | G/T    | Prev               | .96  | .354  | -.005  | .36    | .99  | .347       | -.008 | .63   | .95              | .200  | .009  | .67         | .98  | .637 | .021  | .44  | .92  | .319      | .031    | .66   | -.003           | .48    | .00     | .82     | -.008  | .056    | -.006  | .062    | .00 | .82  |      |
| rs11142387   | 9   | 72998332  | A/C    | Prev               | .99  | .459  | .001   | .85    | .98  | .461       | .033  | .036  | .99              | .620  | -.002 | .9          | .98  | .617 | .025  | .34  | .98  | .365      | .023    | .74   | .004            | .39    | .1520   | .32     | -.008  | .33     | .42    | .60     | .12 |      |      |
| rs11144688   | 9   | 78542286  | G/A    | Prev               | 1    | .875  | -.002  | .82    | .94  | .895       | -.018 | .49   | 1                | .949  | -.005 | .89         | .92  | .962 | .076  | .26  | 1    | .329      | -.008   | .95   | -.002           | .75    | .00     | .79     | -.008  | .16     | .50    | .80     | .81 |      |      |
| rs10868215   | 9   | 87234111  | A/C    | Prev               | 1    | .628  | -.006  | .19    | 1    | .683       | .050  | .0026 | 1                | .701  | -.022 | .2          | 1    | .627 | .030  | .25  | 1    | .660      | .007    | .41   | -.008           | .062   | .6088   | .037    | -.002  | .58     | .002   | .4      | .62 | .43  | .021 |
| rs1147199    | 9   | 87275895  | A/G    | Prev               | 1    | .198  | -.009  | .15    | 1    | .187       | -.038 | .06   | 1                | .208  | .020  | .31         | 1    | .206 | .010  | .27  | 1    | .256      | .055    | .94   | -.008           | .16    | .2632   | .25     | -.017  | .00027  | -.013  | .00024  | .30 | .34  | .21  |
| rs80068415   | 9   | 92093127  | T/C    | Prev               | .83  | 1.000 | .237   | .26    | .92  | .999       | -.078 | .78   | .17              | 1.000 | ---   | 1           | .97  | .994 | .202  | .23  | 1    | 1.000     | -.Inf   | .1    | .216            | .1     | .00     | .9      | .000   | .1      | .216   | .1      | .00 | .9   |      |
| rs2398893    | 9   | 96758342  | A/G    | Prev               | 1    | .723  | .004   | .4     | 1    | .693       | .030  | .07   | 1                | .900  | .002  | .95         | 1    | .611 | -.020 | .44  | 1    | .794      | -.057   | .45   | -.005           | .26    | .00     | .42     | -.006  | .073    | .006   | .037    | .00 | .56  |      |
| rs12236219   | 9   | 97062981  | C/T    | Prev               | .98  | .954  | .013   | .25    | .99  | .838       | .010  | .65   | 1                | .633  | -.030 | .065        | .96  | .917 | -.005 | .91  | .96  | .853      | .267    | .0041 | .019            | .027   | .5174   | .082    | .019   | .0029   | .39    | .67     | .14 |      |      |
| rs4932549    | 9   | 97073588  | A/C    | Prev               | .96  | .327  | .011   | .033   | .97  | .372       | -.024 | .16   | .94              | .392  | -.024 | .16         | .94  | .334 | .029  | .29  | .92  | .290      | -.122   | .1    | .007            | .16    | .5414   | .068    | .002   | .63     | .004   | .2      | .46 | .51  | .096 |
| rs4739902    | 9   | 98256235  | C/T    | Prev               | .99  | .918  | .003   | .73    | .82  | .949       | .003  | .93   | .52              | .988  | .034  | .73         | .79  | .981 | -.106 | .31  | 1    | .992      | -.529   | .15   | -.003           | .76    | .00     | .75     | -.013  | .046    | -.007  | .16     | .00 | .51  |      |
| rs10999303   | 9   | 98410405  | C/T    | Prev               | .88  | .774  | .016   | .0076  | .87  | .717       | .011  | .54   | 1                | .618  | .009  | .56         | .85  | .767 | -.014 | .67  | .84  | .667      | .130    | .083  | .015            | .0566  | .00     | .5      | .010   | .0087   | -.011  | .00017  | .00 | .56  |      |
| rs1443438    | 9   | 100550028 | T/C    | Prev               | 1    | .332  | .004   | .46    | 1    | .294       | -.017 | .32   | 1                | .127  | .003  | .46         | .99  | .106 | -.045 | .16  | 1    | .236      | -.007   | .92   | .001            | .82    | .00     | .48     | .002   | .65     | .001   | .63     | .00 | .62  |      |
| rs1845432    | 9   | 100760113 | G/T    | Prev               | .99  | .782  | .002   | .71    | .97  | .763       | .015  | .42   | 1                | .880  | -.026 | .28         | .99  | .681 | .017  |      |      |           |         |       |                 |        |         |         |        |         |        |         |     |      |      |

| SNP         | Chr | Pos       | Allele | non-Hispanic white |      |       | Latino |        |      | East Asian |        |        | African American |       |       | South Asian |      |      | GERA   |        |       | GIANT EUR |        |       | GERA+GIANT Meta |         |       |
|-------------|-----|-----------|--------|--------------------|------|-------|--------|--------|------|------------|--------|--------|------------------|-------|-------|-------------|------|------|--------|--------|-------|-----------|--------|-------|-----------------|---------|-------|
|             |     |           |        | Info               | Freq | Eff   | P      | Info   | Freq | Eff        | P      | Info   | Freq             | Eff   | P     | Info        | Freq | Eff  | P      | Eff    | P     | Eff       | P      | Eff   | P               | Het     | P     |
| rs1277723   | 10  | 18554623  | G/A    | Prev               | 1    | .221  | -0.017 | .0038  | 1    | .279       | -0.010 | .6     | 1                | .185  | .027  | .42         | 1    | .224 | -.032  | .66    | -.013 | .01       | -.0001 | -.012 | 7.6e-5          | .00     | .62   |
| rs12912454  | 10  | 18584792  | A/G    | Prev               | 1    | .810  | -0.010 | .11    | 1    | .836       | -.002  | .94    | 1                | .936  | -.015 | .77         | 1    | .776 | -.024  | .76    | -.011 | .056      | .00    | .00   | .00             | .00     | .64   |
| rs127702228 | 10  | 21783634  | G/A    | KP                 | .96  | .667  | -.030  | 4.8e-9 | .92  | .970       | -.024  | .62    | .96              | .884  | -.059 | .14         | .96  | .749 | -.098  | .19    | -.028 | 6.7e-9    | 16.90  | .31   | -.011           | .0003   | .03   |
| rs17019823  | 10  | 22036491  | A/C    | Prev               | 1    | .977  | -.051  | .0013  | .98  | .978       | -.022  | .67    | .78              | .989  | -.086 | .77         | .96  | .935 | .121   | .021   | .6    | .051      | .00049 | 46.69 | .15             | .006    | .69   |
| rs7003144   | 10  | 22057405  | A/C    | Prev               | 1    | .977  | -.048  | .0012  | .98  | .978       | -.025  | .64    | .94              | .936  | .129  | .014        | 1    | .992 | -.192  | .6     | .049  | .00075    | 53.64  | .12   | .004            | .76     | .026  |
| rs12257323  | 10  | 22494143  | C/T    | Prev               | .99  | .978  | -.031  | .054   | .99  | .997       | -.040  | .36    | .98              | .998  | -.013 | .67         | .97  | .987 | -.028  | .77    | .023  | .085      | 28.20  | .24   | .003            | .85     | .16   |
| rs2274741   | 10  | 27303605  | A/T    | Prev               | 1    | .858  | -.012  | .067   | 1    | .824       | -.005  | .8     | 1                | .791  | -.075 | .016        | 1    | .680 | .023   | .73    | -.015 | .013      | 9.93   | .35   | -.015           | .00052  | .49   |
| rs10829163  | 10  | 27317840  | C/T    | Prev               | 1    | .858  | -.012  | .074   | 1    | .825       | -.002  | .94    | 1                | .791  | -.073 | .018        | 1    | .681 | .028   | .67    | -.014 | .016      | 13.84  | .33   | -.016           | .00024  | .05   |
| rs7081678   | 10  | 31990623  | G/A    | Prev               | .99  | .925  | -.024  | .0074  | .97  | .902       | -.001  | .98    | .95              | .971  | -.015 | .76         | .92  | .965 | -.005  | .37    | .99   | .973      | .034   | .87   | -.012           | .0092   | .00   |
| rs2163188   | 10  | 524       | -0.016 | .0008              | 1    | .572  | -.013  | .4     | 1    | .688       | -.024  | .16    | 1                | .478  | .005  | .84         | 1    | .585 | -.078  | .25    | -.016 | .00023    | .00    | .77   | -.015           | 5e-5    | .87   |
| rs80117551  | 10  | 69834828  | C/T    | Prev               | .75  | .997  | -.023  | .64    | .94  | .946       | -.001  | .97    | .95              | .707  | .007  | .91         | .95  | .898 | -.008  | .94    | -.015 | .32       | .00    | .95   | .000            | 1       | .015  |
| rs3085142   | 10  | 76854564  | C/T    | Prev               | .99  | .585  | -.007  | .13    | 1    | .847       | -.026  | .091   | .99              | .114  | -.034 | .17         | .98  | .522 | -.019  | .78    | -.005 | .24       | 30.60  | .22   | -.008           | .04     | .007  |
| rs2116830   | 10  | 78646536  | G/T    | Prev               | 1    | .802  | -.006  | .3     | 1    | .847       | -.007  | .75    | 1                | .934  | -.015 | .76         | 1    | .949 | -.032  | .83    | .006  | .31       | .00    | .98   | -.007           | .11     | .00   |
| rs780159    | 10  | 80907147  | A/G    | Prev               | .45  | .381  | -.012  | .094   | .94  | .342       | -.022  | .2     | .44              | .207  | -.069 | .018        | .87  | .188 | -.012  | .74    | -.42  | .307      | .69    | 59.81 | .041            | .006    | .054  |
| rs7903554   | 10  | 87355751  | C/G    | Prev               | 1    | .944  | -.037  | .00035 | .99  | .920       | -.016  | .56    | 1                | .813  | .038  | .062        | .99  | .966 | .159   | .39    | -.020 | .02       | 66.55  | .018  | -.033           | 2.3e-5  | .021  |
| rs7899106   | 10  | 87410904  | A/G    | Prev               | .98  | .952  | -.041  | .00022 | .99  | .961       | -.044  | .27    | .86              | .988  | .071  | .37         | .97  | .977 | .186   | .43    | -.038 | .00024    | .00    | .55   | -.040           | 3e-8    | .69   |
| rs1832886   | 10  | 94477539  | G/A    | Prev               | .99  | .627  | -.012  | .015   | .99  | .583       | -.015  | .34    | .94              | .220  | -.009 | .64         | .97  | .879 | -.101  | .0094  | .97   | .447      | .033   | .61   | -.013           | .0037   | .22   |
| rs7923837   | 10  | 94481917  | G/A    | Prev               | .99  | .621  | -.012  | .011   | .99  | .578       | -.015  | .33    | 1                | .204  | -.008 | .69         | .98  | .884 | -.120  | .0023  | .99   | .442      | .029   | .66   | -.014           | .0025   | .49   |
| rs10786152  | 10  | 95893514  | A/G    | Prev               | .98  | .544  | -.001  | .83    | .98  | .449       | -.004  | .82    | .95              | .331  | .001  | .96         | .96  | .503 | -.002  | .94    | .96   | .544      | -.025  | .71   | -.001           | .477    | .00   |
| rs12569457  | 10  | 99096676  | C/T    | Prev               | .94  | .983  | -.015  | .42    | .9   | .982       | -.081  | .18    | .95              | .893  | -.004 | .88         | .72  | .982 | .018   | .87    | .93   | .952      | .061   | .7    | -.005           | .74     | .00   |
| rs11189413  | 10  | 9996568   | A/G    | Prev               | 1    | .681  | .023   | 7.6e-6 | 1    | .652       | .013   | .42    | 1                | .855  | .048  | .18         | 1    | .559 | .079   | .23    | .023  | 1.1e-6    | .00    | .81   | .012            | .0032   | .016  |
| rs11983864  | 10  | 100017453 | T/C    | Prev               | .96  | .644  | .021   | 3.6e-5 | 1    | .553       | .007   | .65    | 9                | .428  | .002  | .91         | 1    | .870 | .041   | .28    | .92   | .498      | .058   | .39   | .019            | 4.4e-5  | .00   |
| rs17094222  | 10  | 102395440 | T/C    | Prev               | .86  | .777  | -.024  | 7.4e-5 | .87  | .765       | -.025  | .35    | .87              | .559  | .023  | .18         | .94  | .927 | -.056  | .26    | .82   | .618      | -.037  | .62   | -.022           | 2.2e-5  | .00   |
| rs2495707   | 10  | 102425049 | A/G    | Prev               | .85  | .745  | .025   | 3.3e-5 | .94  | .675       | .016   | .35    | .99              | .342  | -.005 | .78         | 1    | .559 | .012   | .63    | .99   | .467      | .190   | .0029 | .010            | .019    | .65   |
| rs8262030   | 10  | 104327584 | A/G    | Prev               | .99  | .578  | -.011  | .021   | .99  | .459       | -.025  | .099   | .99              | .342  | -.005 | .78         | 1    | .559 | .012   | .63    | .99   | .467      | .190   | .0029 | .010            | .019    | .65   |
| rs7917772   | 10  | 10457443  | G/A    | Prev               | .96  | .360  | .006   | .21    | .97  | .478       | .018   | .25    | .98              | .511  | .032  | .042        | .93  | .383 | .034   | .21    | .94   | .559      | -.136  | .035  | .009            | .036    | .53   |
| rs284860    | 10  | 104572963 | T/C    | Prev               | .98  | .411  | .004   | .42    | 1    | .408       | .023   | .17    | .97              | .564  | .013  | .42         | .94  | .368 | .022   | .74    | .006  | .15       | .00    | .60   | .013            | 1.8e-5  | .00   |
| rs6163      | 10  | 104596924 | C/A    | Prev               | 1    | .606  | -.003  | .61    | 1    | .594       | -.023  | .15    | 1                | .631  | -.015 | .58         | 1    | .633 | .020   | .75    | -.006 | .21       | .00    | .66   | -.017           | 1.8e-7  | .00   |
| rs4409766   | 10  | 104616663 | G/A    | Prev               | 1    | .903  | -.025  | .0015  | 1    | .836       | -.054  | .0097  | .99              | .734  | -.040 | .026        | 1    | .786 | .027   | .73    | .030  | 9.5e-6    | .00    | .63   | -.028           | 5.2e-8  | .00   |
| rs11191514  | 10  | 104776364 | C/T    | Prev               | .99  | .911  | -.034  | 4.8e-5 | 1    | .747       | -.044  | .017   | .99              | .940  | -.093 | .082        | 1    | .797 | .075   | .35    | -.037 | 1.5e-7    | .00    | .46   | -.030           | 2.9e-8  | .00   |
| rs11191560  | 10  | 104783038 | T/C    | Prev               | 1    | .912  | -.033  | 8.6e-5 | .98  | .852       | -.056  | .013   | .99              | .960  | -.123 | .059        | 1    | .792 | .073   | .36    | -.037 | 2e-7      | 15.86  | .31   | -.031           | 8.4e-9  | .00   |
| rs11191580  | 10  | 104906211 | T/C    | Prev               | 1    | .753  | -.043  | .015   | 1    | .753       | -.043  | .015   | 1                | .753  | -.043 | .015        | 1    | .753 | .073   | .36    | -.038 | 1.5e-7    | 27.93  | .24   | -.031           | 1.1e-8  | .00   |
| rs7903146   | 10  | 114758349 | C/T    | Prev               | .99  | .702  | .035   | .0036  | 1    | .737       | .034   | .015   | .98              | .993  | .002  | .96         | .99  | .686 | .148   | .031   | .017  | .007      | .28    | .34   | .021            | 3.3e-14 | .27   |
| rs12255372  | 10  | 114808002 | G/T    | Prev               | 1    | .711  | .013   | .01    | 1    | .755       | .022   | .24    | .96              | .968  | .041  | .68         | 1    | .743 | .090   | .23    | .015  | .027      | .00    | .81   | .022            | 3.7e-10 | .00   |
| rs16718358  | 10  | 115189239 | A/G    | Prev               | .58  | 1.000 | .215   | .17    | .84  | .998       | -.247  | .24    | .66              | 1.000 | -.238 | .72         | .94  | .909 | -.1537 | .37    | .034  | .57       | 35.10  | .21   | .000            | .3      | .034  |
| rs10868017  | 10  | 118672531 | C/A    | Prev               | .98  | .756  | -.017  | .0024  | .98  | .700       | -.040  | .02    | .99              | .610  | -.007 | .65         | .97  | .535 | .014   | .58    | -.016 | .0012     | 56.34  | .057  | -.014           | 5.3e-5  | .00   |
| rs1907224   | 10  | 122897969 | G/A    | Prev               | .86  | .024  | -.024  | .15    | .98  | .118       | -.019  | .42    | .97              | .330  | -.027 | .11         | .96  | .445 | -.088  | .00054 | .74   | .071      | .016   | .91   | .001            | .9      | 76.83 |
| rs2257129   | 10  | 122898697 | T/C    | Prev               | .85  | .025  | .024   | .15    | .98  | .118       | -.019  | .42    | .97              | .330  | -.027 | .11         | .96  | .445 | -.088  | .00054 | .74   | .071      | .016   | .91   | .001            | .9      | 76.83 |
| rs7090307   | 10  | 123234492 | T/C    | Prev               | .99  | .655  | .007   | .14    | .98  | .668       | .046   | .0032  | .99              | .670  | .055  | .0013       | .97  | .551 | .014   | .6     | .99   | .689      | -.000  | 1     | .014            | .0017   | 65.81 |
| rs1968079   | 10  | 125251751 | T/C    | Prev               | 1    | .756  | .009   | .11    | 1    | .660       | -.039  | .017   | 1                | .684  | -.054 | .0016       | .98  | .727 | -.008  | .8     | .99   | .721      | .044   | .54   | .015            | .0023   | 57.18 |
| rs1615589   | 10  | 126695673 | G/A    | Prev               | .89  | .631  | -.017  | .0018  | .98  | .603       | -.038  | .017   | .91              | .760  | -.008 | .67         | 1    | .438 | -.036  | .16    | .84   | .573      | .004   | .95   | -.019           | 7.1e-5  | .00   |
| rs2946994   | 10  | 126714714 | G/A    | Prev               | .98  | .510  | -.015  | .0018  | 1    | .592       | .009   | .54    | .99              | .355  | .003  | .86         | 1    | .597 | -.001  | .95    | .98   | .588      | -.006  | .92   | -.013           | .0024   | .00   |
| rs3781409   | 10  | 126715629 | A/G    | Prev               | .98  | .728  | -.010  | .071   | 1    | .735       | -.026  | .14    | .99              | .762  | -.012 | .53         | .99  | .887 | -.057  | .11    | .95   | .779      | .075   | .35   | -.012           | .017    | .00   |
| rs7126805   | 11  | 828916    | G/A    | Prev               | .46  | .286  | -.009  | .25    | .86  | .247       | -.042  | .027   | .38              | .294  | .008  | .78         | .88  | .476 | .001   | .96    | .41   | .341      | .032   | .77   | -.011           | .094    | .00   |
| rs231906    | 11  | 2752609   | G/A    | Prev               | .48  | .424  | -.005  | .5     | .94  | .449       | -.027  | .09    | .46              | .593  | -.001 | .98         | .84  | .348 | .015   | .59    | .45   | .457      | -.088  | .35   | .001            | .92     | 11.05 |
| rs2237892   | 11  | 2839751   | C/T    | Prev               | .35  | .906  | -.000  | .98    | 1    | .816       | -.071  | .00028 | .93              | .993  | -.020 | .81         | .92  | .888 | -.025  | .56    | .33   | .862      | -.044  | .78   | -.024           | .027    | 54.42 |
| rs60808706  | 11  | 2857233   | G/A    | Prev               | .33  | .915  | -.011  | .46    | 1    | .820       | -.075  | .00018 | .98              | .929  | .032  | .51         | .84  | .824 | -.023  | .53    | .33   | .852      | .092   | .54   | -.017           | .13     | 70.30 |
| rs2237897   | 11  | 2858546   | C/T    | Prev               | .33  | .923  | -.014  | .38    | .93  | .830       | -.073  | .00047 | .96              | .929  | .037  | .46         | .81  | .905 | -.039  | .41    | .32   | .860      | .143   | .36   | -.015           | .21     | 70.26 |
| rs16937956  | 11  | 8404501   | A/G    | Prev               | 1    | .628  | .009   | .058   | 1    | .565       | .002   | .9     | .99              | .432  | -.023 | .16         | 1    | .715 | -.027  | .34    | 1     | .506      | .048   | .45   | .006            | .21     | 26.53 |
| rs4929949   | 11  | 8604593   | T/C    | Prev               | 1    | .502  | -.011  | .017   | 1    | .508       | -.012  | .44    | .99              | .584  | .008  | .63         | 1    | .579 | .011   | .66    | .99   | .655      | -.099  | .15   | -.010           | .023    | .00   |
| rs4929923   | 11  | 8639200   | T/C    | Prev               | .99  | .371  | -.012  | .013   | .98  | .424       | -.029  | .06    | .99              | .616  | .022  | .19         | .97  | .440 | .038   | .15    | .99   | .481      | -.059  | .36   | -.010           | .025    | 57.69 |
| rs4929927   | 11  | 8658485   | A/G    | Prev               | 1    | .358  | -.012  | .012   |      |            |        |        |                  |       |       |             |      |      |        |        |       |           |        |       |                 |         |       |



| SNP         | Chr | Pos       | Allele | non-Hispanic white |      |       | Latino |        |      | East Asian |       |       | African American |      |       | South Asian |      |      | GERA  |       |      | GIANT EUR |       |      | GERA+GIANT Meta |        |       |       |      |         |       |         |        |       |        |         |     |     |
|-------------|-----|-----------|--------|--------------------|------|-------|--------|--------|------|------------|-------|-------|------------------|------|-------|-------------|------|------|-------|-------|------|-----------|-------|------|-----------------|--------|-------|-------|------|---------|-------|---------|--------|-------|--------|---------|-----|-----|
|             |     |           |        | Info               | Freq | Eff   | P      | Info   | Freq | Eff        | P     | Info  | Freq             | Eff  | P     | Info        | Freq | Eff  | P     | Eff   | P    | Eff       | P     | Eff  | P               | Eff    | P     |       |      |         |       |         |        |       |        |         |     |     |
| rs2077177   | 12  | 54418857  | T/C    | Prev               | .97  | .590  | .002   | .72    | .96  | .584       | -.029 | .064  | .96              | .382 | .014  | .39         | .589 | .482 | -.058 | .028  | .9   | .625      | .071  | .31  | -.001           | .79    | 60.37 | .039  | .001 | .85     | -.000 | .98     | 50.97  | .07   |        |         |     |     |
| rs7541533   | 12  | 54418920  | C/A    | Prev               | .99  | .639  | .004   | .47    | .99  | .640       | -.026 | .11   | .99              | .377 | .014  | .36         | .99  | .840 | -.005 | .96   | .1   | .738      | .088  | .24  | .002            | .6     | 20.53 | .29   | .002 | .36     | -.002 | .43     | .58    | .41   |        |         |     |     |
| rs10876328  | 12  | 54421476  | C/A    | Prev               | .1   | .636  | .005   | .31    | .1   | .635       | -.013 | .015  | .96              | .372 | .014  | .36         | .1   | .738 | -.005 | .96   | .1   | .730      | .070  | .34  | .002            | .62    | 51.79 | .081  | .000 | .97     | .001  | .72     | 40.63  | .13   |        |         |     |     |
| rs2071449   | 12  | 54428611  | C/A    | Prev               | .97  | .639  | .005   | .33    | .97  | .643       | -.029 | .078  | .94              | .378 | .013  | .42         | .96  | .836 | .002  | .95   | .35  | .737      | .089  | .23  | .003            | .49    | 29.10 | .42   | .000 | .92     | .001  | .63     | 13.24  | .32   |        |         |     |     |
| rs3809128   | 12  | 56709919  | C/T    | Prev               | .32  | .987  | .018   | .63    | .48  | .948       | .046  | .62   | .92              | .848 | .014  | .52         | .34  | .936 | .328  | .076  | .43  | .939      | .185  | .36  | .018            | .33    | .00   | .42   | .000 | .1      | .018  | .33     | .00    | .42   |        |         |     |     |
| rs7307410   | 12  | 65542678  | C/G    | Prev               | .1   | .258  | .012   | .03    | .1   | .262       | -.006 | .72   | .96              | .020 | .047  | .42         | .99  | .321 | -.034 | .22   | .1   | .152      | .100  | .22  | .009            | .068   | 17.23 | .3    | .005 | .23     | .007  | .035    | 3.86   | .39   |        |         |     |     |
| rs7970350   | 12  | 66360164  | C/T    | Prev               | .1   | .495  | .006   | .23    | .1   | .412       | -.010 | .52   | .5               | .997 | .016  | .72         | .51  | .996 | -.192 | .52   | .54  | .984      | .020  | .78  | .010            | .4     | .00   | .95   | .44  | .002    | .87   | -.007   | .56    | .00   | .94    |         |     |     |
| rs61754230  | 12  | 72179446  | C/T    | Prev               | .6   | .984  | -.018  | .48    | .65  | .985       | -.029 | .72   | .5               | .997 | .016  | .72         | .51  | .996 | -.192 | .52   | .54  | .984      | .020  | .78  | .010            | .4     | .00   | .95   | .44  | .002    | .87   | -.007   | .56    | .00   | .94    |         |     |     |
| rs10777237  | 12  | 90643524  | T/C    | Prev               | .98  | .279  | .005   | .33    | .98  | .348       | .026  | .11   | .99              | .395 | .044  | .0071       | .96  | .335 | -.015 | .58   | .95  | .325      | .020  | .78  | .010            | .438   | 43.48 | .13   | .021 | 8.36    | -.016 | 4.66    | 50.25  | .074  |        |         |     |     |
| rs11068539  | 12  | 90671038  | A/G    | Prev               | .66  | .516  | -.001  | .9     | .66  | .554       | .012  | .53   | .78              | .610 | .025  | .17         | .75  | .606 | .004  | .99   | .59  | .479      | .005  | .96  | .003            | .66    | .00   | .71   | .006 | .1      | .005  | .11     | .00    | .79   |        |         |     |     |
| rs11109072  | 12  | 97901270  | C/A    | Prev               | .95  | .965  | .006   | .66    | .99  | .905       | .003  | .92   | .96              | .761 | .041  | .029        | .98  | .757 | -.017 | .57   | .93  | .880      | -.043 | .68  | .012            | .22    | .00   | .42   | .012 | .21     | .012  | .79     | .00    | .56   |        |         |     |     |
| rs12229654  | 12  | 11141461  | T/G    | Prev               | .34  | .997  | .021   | .78    | .45  | .994       | .128  | .39   | .85              | .813 | .020  | .36         | .99  | .997 | -.164 | .64   | .39  | .981      | .204  | .59  | .021            | .3     | .00   | .85   | .000 | .85     | .000  | .00     | .56    | .00   | .56    |         |     |     |
| rs3184504   | 12  | 111884608 | T/C    | Prev               | .1   | .494  | -.020  | 2.9e-5 | .1   | .333       | .001  | .93   | .1               | .927 | .043  | .36         | .1   | .118 | .023  | .55   | .1   | .121      | .064  | .55  | .017            | .00017 | 20.96 | .28   | .014 | 9.36    | -.015 | 5.8e-9  | 6.86   | .37   |        |         |     |     |
| rs11065987  | 12  | 112072424 | A/G    | Prev               | .1   | .565  | .017   | .0003  | .1   | .976       | -.032 | .94   | .1               | .976 | -.032 | .94         | .1   | .904 | -.172 | .099  | .95  | .011      | 28.96 | .23  | .015            | 3.9e-9 | 11.27 | .34   | .015 | 5.8e-9  | 6.86  | .37     | .34    | .015  | 5.8e-9 | 6.86    | .37 |     |
| rs671       | 12  | 112241766 | G/A    | Prev               | .41  | 1.000 | .409   | .016   | .45  | .973       | -.011 | .88   | .99              | .785 | .017  | .37         | .45  | .996 | .253  | .36   | .41  | .991      | .034  | .81  | .021            | .25    | 51.50 | .1    | .000 | 1       | .021  | .25     | 51.50  | .1    | .000   | 1       |     |     |
| rs7305242   | 12  | 112256762 | T/C    | Prev               | .89  | .996  | .070   | .07    | .92  | .893       | -.011 | .61   | .9               | .440 | .011  | .49         | .92  | .935 | .034  | .81   | .012 | .33       | .000  | .52  | .000            | .1     | .012  | .33   | .000 | .1      | .012  | .33     | .000   | .52   | .000   | .1      |     |     |
| rs17630235  | 12  | 112591686 | G/A    | Prev               | .1   | .571  | .019   | .0011  | .1   | .701       | .004  | .8    | .89              | .974 | .023  | .66         | .99  | .899 | -.021 | .62   | .1   | .903      | .151  | .14  | .017            | .00025 | 4.93  | .38   | .016 | 6.4e-7  | .016  | 5e-10   | .00    | .51   | .016   | 5e-10   | .00 | .51 |
| rs2301712   | 12  | 112641377 | T/G    | Prev               | .1   | .983  | .015   | .41    | .1   | .859       | .012  | .63   | .1               | .396 | .022  | .17         | .1   | .841 | .008  | .81   | .1   | .910      | .029  | .81  | .012            | .24    | .00   | .82   | .034 | .13     | .012  | .24     | .00    | .82   | .034   | .13     |     |     |
| rs729062    | 12  | 113687859 | A/G    | Prev               | .99  | .934  | -.003  | .74    | .99  | .935       | -.025 | .43   | .95              | .966 | .128  | .077        | .99  | .949 | -.146 | .32   | .95  | .995      | .160  | .75  | .022            | .41    | .00   | .61   | .000 | .1      | -.022 | .41     | .00    | .61   | .000   | .1      |     |     |
| rs56214831  | 12  | 117977550 | C/T    | Prev               | .8   | .991  | -.028  | .31    | .84  | .992       | .060  | .53   | .38              | .997 | .148  | .57         | .8   | .995 | .160  | .75   | .022 | .41       | .00   | .61  | .000            | .1     | -.022 | .41   | .00  | .61     | .000  | .1      | -.022  | .41   | .00    | .61     |     |     |
| rs122396395 | 12  | 122396395 | C/T    | Prev               | .1   | .704  | .012   | .027   | .1   | .664       | .042  | .0099 | .1               | .532 | -.004 | .78         | .99  | .931 | -.048 | .27   | .1   | .671      | .059  | .4   | .012            | .013   | 46.13 | .12   | .005 | .16     | .008  | .0082   | 40.89  | .13   | .005   | .16     |     |     |
| rs11765261  | 12  | 122405912 | G/T    | Prev               | .98  | .703  | .012   | .024   | .1   | .662       | .043  | .0089 | .98              | .540 | -.002 | .9          | .1   | .868 | -.058 | .11   | .97  | .674      | .067  | .35  | .012            | .013   | 56.79 | .055  | .006 | .16     | .008  | .0071   | 50.73  | .071  | .006   | .16     |     |     |
| rs1169081   | 12  | 122617989 | A/G    | Prev               | .93  | .602  | .008   | .13    | .1   | .601       | -.001 | .96   | .85              | .632 | -.007 | .67         | .1   | .511 | .002  | .93   | .87  | .626      | .013  | .86  | .006            | .2     | .00   | .92   | .005 | .27     | .005  | .091    | .00    | .97   | .005   | .27     |     |     |
| rs11057405  | 12  | 122781897 | G/A    | Prev               | .79  | .906  | .023   | .014   | .83  | .918       | .060  | .051  | .52              | .981 | .089  | .26         | .75  | .974 | .031  | .74   | .67  | .931      | .025  | .88  | .026            | .003   | .00   | .64   | .031 | 2e-8    | .029  | 2.9e-10 | .00    | .74   | .031   | 2e-8    |     |     |
| rs10846664  | 12  | 122823777 | A/G    | Prev               | .98  | .252  | .012   | .036   | .98  | .280       | -.023 | .18   | .94              | .166 | .029  | .18         | .1   | .166 | .012  | .72   | .97  | .181      | .003  | .98  | .010            | .051   | 7.73  | .36   | .018 | 7.2e-7  | .015  | 2.8e-7  | 15.58  | .31   | .018   | 7.2e-7  |     |     |
| rs4319547   | 12  | 123079035 | A/G    | Prev               | .99  | .263  | -.011  | .038   | .99  | .324       | -.049 | .0033 | .99              | .164 | .029  | .18         | .99  | .133 | .013  | .72   | .97  | .206      | .035  | .68  | .012            | .017   | 57.13 | .053  | .017 | 1.3e-6  | .015  | 1e-7    | 50.00  | .075  | .017   | 1.3e-6  |     |     |
| rs34149579  | 12  | 123345509 | T/C    | Prev               | .68  | .942  | .016   | .18    | .1   | .976       | -.009 | .85   | .74              | .65  | .985  | .001        | .99  | .62  | .985  | -.223 | .51  | .015      | .2    | .00  | .96             | .019   | .00   | .96   | .019 | .00     | .96   | .019    | .00    | .96   | .019   | .00     |     |     |
| rs12317176  | 12  | 124044718 | T/C    | Prev               | .97  | .657  | -.014  | .077   | .99  | .678       | -.018 | .27   | .94              | .842 | -.034 | .13         | .98  | .480 | -.018 | .47   | .94  | .761      | .081  | .29  | .015            | .0011  | .00   | .81   | .012 | .00035  | -.013 | 1.7e-6  | .00    | .85   | .012   | .00035  |     |     |
| rs17133378  | 12  | 124190502 | G/A    | Prev               | .96  | .674  | -.014  | .066   | .99  | .693       | -.012 | .46   | .97              | .851 | -.030 | .19         | .99  | .487 | -.017 | .49   | .96  | .775      | .083  | .28  | .015            | .0015  | .00   | .87   | .013 | 5.8e-5  | -.014 | 2.4e-7  | .00    | .93   | .013   | 5.8e-5  |     |     |
| rs11057396  | 12  | 124190621 | G/A    | Prev               | .99  | .656  | -.013  | .011   | .1   | .696       | .010  | .55   | .97              | .846 | .031  | .17         | .98  | .663 | .008  | .77   | .97  | .767      | .065  | .39  | .013            | .0053  | .00   | .78   | .011 | .025    | .012  | .00038  | .00    | .87   | .011   | .025    |     |     |
| rs11057397  | 12  | 124191728 | C/A    | Prev               | .99  | .652  | -.013  | .0095  | .99  | .694       | -.012 | .47   | .98              | .853 | -.026 | .24         | .97  | .662 | .011  | .67   | .97  | .767      | .065  | .39  | .013            | .005   | .00   | .8    | .011 | .00044  | -.012 | 7e-6    | .00    | .89   | .011   | .00044  |     |     |
| rs4765219   | 12  | 124441010 | C/A    | Prev               | .99  | .659  | -.013  | .0092  | .99  | .702       | -.011 | .5    | .98              | .891 | -.022 | .24         | .98  | .673 | .012  | .64   | .97  | .780      | .076  | .32  | .013            | .0062  | .00   | .79   | .011 | .00044  | -.012 | 7e-6    | .00    | .88   | .011   | .00044  |     |     |
| rs7973683   | 12  | 124449223 | C/A    | Prev               | .99  | .652  | -.014  | .0041  | .99  | .680       | -.020 | .24   | .98              | .889 | -.023 | .36         | .97  | .477 | -.017 | .51   | .97  | .780      | .074  | .33  | .013            | .0068  | .00   | .94   | .012 | .00035  | -.013 | 1.4e-6  | .00    | .94   | .012   | .00035  |     |     |
| rs863750    | 12  | 124505444 | C/A    | Prev               | .1   | .403  | .007   | .14    | .1   | .462       | -.028 | .074  | .94              | .504 | .005  | .74         | .1   | .546 | .039  | .12   | .1   | .367      | .105  | .11  | .009            | .036   | 33.73 | .2    | .014 | 9.7e-6  | .012  | 1.4e-6  | 25.85  | .24   | .014   | 9.7e-6  |     |     |
| rs11730409  | 12  | 124506631 | T/C    | Prev               | .1   | .598  | -.007  | .15    | .1   | .539       | -.029 | .065  | .94              | .496 | -.005 | .76         | .98  | .478 | -.017 | .49   | .99  | .638      | .113  | .086 | .012            | .008   | .55   | 25.47 | .25  | .008    | .72   | .002    | 1.5e-6 | 23.48 | .26    | .008    | .72 |     |
| rs123701184 | 12  | 132701184 | G/A    | Prev               | .49  | .820  | .006   | .51    | .99  | .760       | -.029 | .11   | .43              | .802 | -.020 | .52         | .97  | .863 | -.019 | .62   | .41  | .826      | .213  | .13  | .002            | .77    | 32.69 | .2    | .025 | 3.5e-6  | .017  | 7.4e-5  | 57.89  | .037  | .025   | 3.5e-6  |     |     |
| rs7323      | 13  | 28009031  | G/C    | Prev               | .1   | .730  | .024   | 7.2e-6 | .1   | .752       | .009  | .65   | .1               | .906 | .009  | .75         | .1   | .804 | .071  | .027  | .1   | .880      | .019  | .84  | .023            | 2.3e-6 | .00   | .54   | .017 | 5.2e-5  | .020  | 8.2e-10 | .00    | .42   | .017   | 5.2e-5  |     |     |
| rs9581854   | 13  | 28017782  | C/T    | Prev               | .99  | .819  | -.018  | .0043  | .99  | .867       | .010  | .65   | .99              | .840 | -.035 | .1          | .93  | .928 | .006  | .91   | .99  | .903      | .035  | .74  | .017            | .0031  | .00   | .67   | .029 | 5.9e-10 | .024  | 2.8e-11 | .00    | .54   | .029   | 5.9e-10 |     |     |
| rs4771122   | 13  | 28020180  | G/A    | Prev               | .96  | .238  | .013   | .018   | .1   | .210       | -.010 | .58   | .1               | .213 | .058  | .0026       | .1   | .223 | .001  | .98   | .91  | .205      | .005  | .95  | .014            | .0052  | 43.63 | .13   | .027 | 2.6e-9  | .022  | 2.8e-10 | 52.84  | .06   | .027   | 2.6e-9  |     |     |
| rs1006353   | 13  | 28047269  | A/G    | Prev               | .1   | .250  | .015   | .0079  | .1   | .332       | -.001 | .96   | .1               | .655 | .013  | .42         | .1   | .206 | .002  | .93   | .1   | .276      | .047  | .51  | .013            | .0084  | .00   | .88   | .020 | 3.9e-9  | .018  | 1.5e-10 | 52.84  | .06   | .020   | 3.9e-9  |     |     |
| rs2504236   | 13  |           |        |                    |      |       |        |        |      |            |       |       |                  |      |       |             |      |      |       |       |      |           |       |      |                 |        |       |       |      |         |       |         |        |       |        |         |     |     |

| SNP         | Chr | Pos       | Allele | non-Hispanic white |      |      | Latino |        |      | East Asian |       |        | African American |       |       | South Asian |      |      | GERA  |       |        | GIANT EUR |       |       | GERA+GIANT Meta |         |         |         |         |         |       |         |        |      |     |
|-------------|-----|-----------|--------|--------------------|------|------|--------|--------|------|------------|-------|--------|------------------|-------|-------|-------------|------|------|-------|-------|--------|-----------|-------|-------|-----------------|---------|---------|---------|---------|---------|-------|---------|--------|------|-----|
|             |     |           |        | Info               | Freq | Eff  | P      | Info   | Freq | Eff        | P     | Info   | Freq             | Eff   | P     | Info        | Freq | Eff  | P     | Eff   | P      | Eff       | P     | Eff   | P               | Eff     | P       |         |         |         |       |         |        |      |     |
| rs11024704  | 14  | 78786077  | A/C    | Prev               | 1    | .857 | .003   | .69    | 1    | .857       | .012  | .59    | 1                | .917  | -.021 | .47         | 1    | .884 | -.055 | .16   | .001   | .84       | -.00  | .45   | .009            | .11     | .006    | .19     | .00     | .47     |       |         |        |      |     |
| rs17141420  | 14  | 78989454  | G/T    | Prev               | 1    | .471 | -.016  | .00018 | 1    | .396       | -.029 | .065   | 1                | .416  | -.015 | .54         | 1    | .423 | .066  | .32   | -.017  | .78e-5    | -.00  | .69   | -.022           | 1.2e-11 | -.020   | 2.7e-17 | .00     | .58     |       |         |        |      |     |
| rs23705983  | 14  | 79903376  | C/T    | Prev               | .99  | .354 | -.016  | .0018  | .99  | .354       | -.014 | .38    | .96              | .776  | -.073 | .019        | .99  | .362 | .072  | .28   | -.028  | 1.00e5    | -.00  | .75   | -.022           | 2.4e-11 | -.020   | 2.7e-17 | .00     | .69     |       |         |        |      |     |
| rs17109221  | 14  | 79910119  | C/T    | Prev               | 1    | .791 | -.026  | 1.3e-5 | .99  | .787       | -.044 | .012   | .98              | .987  | -.004 | .95         | .97  | .673 | .064  | .57   | -.028  | 3.4e-7    | -.00  | .44   | -.025           | 4.3e-8  | -.026   | 7.8e-14 | .00     | .66     |       |         |        |      |     |
| rs17109256  | 14  | 79939664  | G/T    | Prev               | 1    | .789 | -.027  | 4.5e-6 | .99  | .786       | -.048 | .017   | .99              | .986  | -.002 | .97         | .983 | .056 | .57   | -.029 | 9.6e-8 | -.00      | .63   | -.024 | 1.8e-7          | -.026   | 1.1e-13 | .00     | .66     |         |       |         |        |      |     |
| rs17109256  | 14  | 79939664  | G/T    | Prev               | 1    | .789 | -.026  | 7.9e-6 | .99  | .786       | -.048 | .019   | .99              | .987  | -.011 | .88         | .99  | .885 | .058  | .56   | -.028  | 1.3e-7    | -.00  | .44   | -.028           | 7.2e-14 | -.029   | 1.2e-10 | .00     | .66     |       |         |        |      |     |
| rs17144011  | 14  | 79940383  | G/A    | Prev               | 1    | .790 | -.026  | 6.2e-6 | .99  | .796       | -.046 | .017   | .99              | .986  | -.006 | .93         | .99  | .885 | .059  | .55   | -.028  | 1.9e-7    | -.00  | .52   | -.028           | 1.2e-14 | -.029   | 3.6e-20 | .00     | .69     |       |         |        |      |     |
| rs17156625  | 14  | 79942647  | A/G    | Prev               | 1    | .788 | -.026  | 4.2e-6 | .99  | .787       | -.048 | .011   | .98              | .986  | -.017 | .8          | .97  | .600 | -.001 | .023  | 1      | .881      | .058  | .55   | -.025           | 1.3e-7  | -.027   | 4e-14   | .00     | .57     |       |         |        |      |     |
| rs17466997  | 14  | 79945162  | A/G    | Prev               | 1    | .788 | -.026  | 7.3e-6 | .99  | .787       | -.048 | .012   | .98              | .986  | -.006 | .93         | 1    | .659 | -.022 | .4    | .881   | .058      | .55   | -.027 | 4.6e-8          | -.026   | 1.3e-11 | .00     | .57     |         |       |         |        |      |     |
| rs74926077  | 14  | 91547136  | C/G    | Prev               | .98  | .688 | -.016  | .0015  | .98  | .682       | -.001 | .97    | .96              | .498  | -.009 | .72         | .94  | .686 | -.071 | .32   | -.014  | .0037     | -.00  | .51   | .011            | .0071   | .012    | 8.1e-5  | .00     | .63     |       |         |        |      |     |
| rs21600077  | 14  | 92428410  | G/A    | Prev               | 1    | .572 | -.006  | .19    | 1    | .686       | -.034 | .038   | 1                | .726  | -.024 | .34         | 1    | .594 | .060  | .36   | -.008  | .077      | .29   | .73   | -.012           | 9.7e-5  | -.011   | 3.2e-5  | .20     | .45     |       |         |        |      |     |
| rs30707661  | 14  | 92459958  | C/T    | Prev               | 1    | .532 | -.004  | .45    | 1    | .645       | -.043 | .0079  | 1                | .570  | -.016 | .62         | 1    | .331 | -.016 | .55   | -.007  | .13       | .44   | .76   | .12             | -.010   | .00062  | -.010   | .0027   | 35.29   | .15   |         |        |      |     |
| rs3783890   | 14  | 93790276  | T/C    | Prev               | 1    | .812 | -.017  | .0045  | 1    | .788       | -.032 | .093   | 1                | .890  | -.012 | .76         | 1    | .768 | .003  | .97   | -.015  | .005      | -.00  | .5    | .019            | .76e-7  | .018    | 1.3e-8  | .00     | .59     |       |         |        |      |     |
| rs12147136  | 14  | 94072304  | A/C    | Prev               | .99  | .297 | -.032  | 1.7e-9 | .99  | .311       | -.014 | .42    | .99              | .591  | -.023 | .16         | .97  | .334 | .004  | .89   | -.97   | .421      | .025  | -.7   | -.028           | 1.6e-9  | -.018   | 1.2e-9  | 52.33   | .063    |       |         |        |      |     |
| rs7290502   | 14  | 94100502  | G/T    | Prev               | .99  | .293 | -.025  | 2.4e-6 | .99  | .308       | -.017 | .67    | .97              | .585  | -.018 | .28         | .97  | .137 | .005  | .89   | .99    | .333      | -.007 | .92   | -.022           | 2.3e-6  | -.010   | 6.1e-7  | 1.58    | .41     |       |         |        |      |     |
| rs4384548   | 14  | 96345143  | A/G    | Prev               | .84  | .019 | .015   | .42    | .77  | .013       | .082  | .3     | .56              | .004  | .008  | .96         | .72  | .033 | -.033 | .69   | .46    | .012      | .205  | .66   | -.016           | .36     | .00     | .79     | .00     | .84     |       |         |        |      |     |
| rs1743963   | 14  | 103304425 | C/T    | Prev               | 1    | .824 | -.020  | .0014  | 1    | .711       | -.033 | .05    | .98              | .624  | -.019 | .24         | 1    | .434 | -.028 | .25   | 1      | .910      | -.046 | .68   | -.022           | 5.6e-5  | .00     | .96     | .00     | .98     |       |         |        |      |     |
| rs1709400   | 14  | 103342049 | T/C    | Prev               | 1    | .769 | -.020  | .00033 | 1    | .640       | -.023 | .16    | 1                | .610  | -.025 | .13         | 1    | .225 | .032  | .28   | 1      | .861      | -.061 | .51   | -.021           | 1.8e-5  | .00     | .98     | .00     | .62     |       |         |        |      |     |
| rs1131877   | 14  | 104149475 | A/G    | Prev               | 1    | .617 | .006   | .19    | 1    | .726       | .036  | .034   | 1                | .893  | .003  | .9          | 1    | .742 | .028  | .71   | .009   | .059      | .00   | .46   | -.017           | 1e-7    | .014    | 3.4e-8  | 13.42   | .33     |       |         |        |      |     |
| rs861539    | 14  | 104165753 | G/A    | Prev               | .98  | .615 | .007   | .18    | .99  | .725       | .036  | .036   | .92              | .905  | .003  | .91         | 1    | .774 | .026  | .39   | .96    | .736      | .030  | .7    | .009            | .051    | .00     | .51     | .015    | 8.8e-5  |       |         |        |      |     |
| rs12440086  | 15  | 27038492  | C/A    | Prev               | .99  | .474 | -.012  | .009   | .99  | .388       | -.034 | .032   | 1                | .431  | -.011 | .5          | .97  | .793 | .024  | .45   | .99    | .394      | .119  | .077  | -.014           | .0017   | -.013   | 9.9e-6  | 14.03   | .32     |       |         |        |      |     |
| rs8042543   | 15  | 31708263  | C/T    | Prev               | .96  | .788 | -.016  | .0084  | .95  | .721       | .012  | .49    | .96              | .668  | -.035 | .041        | .97  | .895 | -.056 | .18   | -.92   | .762      | .033  | .66   | -.016           | .003    | 15.49   | .32     | -.005   | .16     |       |         |        |      |     |
| rs8037818   | 15  | 32927476  | C/T    | Prev               | 1    | .230 | .002   | .7     | 1    | .204       | -.009 | .64    | 1                | .329  | .005  | .74         | 1    | .310 | -.033 | .63   | -.002  | .73       | .00   | .94   | -.001           | .8      | .00     | .004    | 30.62   | .21     |       |         |        |      |     |
| rs149113955 | 15  | 39654281  | G/A    | Prev               | .54  | .997 | .030   | .63    | 1    | .597       | -.088 | .68    | .36              | 1.000 | 1.043 | .3          | .48  | .999 | .147  | .81   | .14    | .999      | 1.859 | .54   | .021            | .1      | .00     | .69     | .00     | .6      |       |         |        |      |     |
| rs1711906   | 15  | 40325691  | C/T    | Prev               | 1    | .971 | .001   | .93    | 1    | .778       | -.017 | .36    | .99              | .590  | .013  | .41         | 1    | .807 | .174  | .033  | .004   | .66       | .35   | .33   | .19             | -.002   | .79     | 30.73   | .00     | .2      |       |         |        |      |     |
| rs1559677   | 15  | 47738063  | A/G    | Prev               | 1    | .619 | -.016  | .0015  | 1    | .585       | .003  | .84    | 1                | .516  | .013  | .4          | 1    | .285 | .040  | .16   | 1      | .542      | -.131 | .049  | -.011           | .013    | 62.03   | .032    | -.018   | 1.9e-5  | 52.55 | .061    |        |      |     |
| rs3736485   | 15  | 51748610  | A/G    | Prev               | .98  | .474 | .006   | .19    | .97  | .494       | .035  | .026   | 1                | .818  | .006  | .77         | .97  | .570 | .013  | .62   | .93    | .593      | .020  | .76   | -.002           | .59     | 41.19   | .15     | .018    | 7.4e-7  | 66.12 | .011    |        |      |     |
| rs8030605   | 15  | 56504598  | G/A    | Prev               | 1    | .870 | .013   | .069   | 1    | .838       | .020  | .37    | 1                | .568  | .032  | .043        | .99  | .904 | .005  | .9    | 1      | .730      | .051  | .48   | .013            | .031    | 1.42    | .4      | .015    | .0013   | .00   | .53     |        |      |     |
| rs12595496  | 15  | 56528806  | A/G    | Prev               | .99  | .869 | .013   | .068   | .99  | .832       | -.020 | .35    | .98              | .590  | .033  | .04         | .99  | .903 | .006  | .89   | .98    | .730      | .054  | .45   | .013            | .03     | 6.27    | .37     | .012    | .01     | .012  | .00081  | .00    | .51  |     |
| rs2593235   | 15  | 57541201  | G/A    | Prev               | .98  | .439 | .025   | .074   | .98  | .612       | .008  | .65    | .99              | .630  | .048  | .075        | .98  | .536 | .019  | .77   | .011   | .011      | .478  | .38   | .007            | .054    | .009    | .0019   | .00     | .28     | .45   |         |        |      |     |
| rs17203831  | 15  | 62134392  | T/G    | Prev               | .97  | .976 | .025   | .17    | .98  | .805       | .074  | .00295 | 1                | .904  | .010  | .82         | 1    | .907 | .009  | .38   | .035   | .001      | .35   | .49   | .028            | .0025   | .031    | 9.4e-6  | 23.32   | .26     | .48   |         |        |      |     |
| rs172149754 | 15  | 62319432  | G/C    | Prev               | .98  | .978 | .029   | .075   | .99  | .900       | .009  | .73    | .98              | .792  | .070  | .00043      | .99  | .945 | -.014 | .81   | .97    | .012      | .067  | .56   | .036            | .00092  | .021    | .47     | .28     | .026    | .029  | .032    | 8.9e-5 | 8.64 | .36 |
| rs11071896  | 15  | 66821250  | A/G    | Prev               | 1    | .740 | .008   | .14    | 1    | .810       | -.011 | .58    | 1                | .806  | -.004 | .86         | 1    | .907 | .077  | .081  | .009   | .083      | .00   | .47   | .013            | .001    | .00038  | .00     | .34     | .00     | .53   | .068    |        |      |     |
| rs14403572  | 15  | 67053151  | T/C    | Prev               | .98  | .287 | .000   | .96    | .98  | .099       | .035  | .052   | .98              | .071  | -.003 | .93         | .97  | .148 | .010  | .79   | .97    | .664      | .182  | .010  | .002            | .008    | 5.7e-5  | .00     | .33     | .00     | .53   | .068    |        |      |     |
| rs17160081  | 15  | 67492501  | G/A    | Prev               | 1    | .244 | -.004  | .35    | 1    | .315       | -.027 | .096   | 1                | .486  | -.010 | .94         | 1    | .205 | .010  | .58   | .99    | .320      | .095  | .16   | -.004           | .36     | 10.25   | .29     | -.010   | .0042   | .39   | .28     | .31    |      |     |
| rs11637027  | 15  | 67497735  | G/T    | Prev               | .98  | .414 | -.025  | 3.2e-7 | .99  | .661       | -.045 | .0034  | .98              | .759  | -.039 | .037        | .96  | .463 | -.062 | .019  | .97    | .354      | .116  | .008  | -.029           | 1.1e-11 | .00     | .44     | -.024   | 9.4e-9  | .00   | .46     |        |      |     |
| rs80826535  | 15  | 68043059  | G/T    | Prev               | .99  | .769 | .024   | .25e-5 | 1    | .583       | .048  | .0017  | .99              | .473  | .002  | .91         | .98  | .683 | .098  | .16   | 1      | .648      | .118  | .077  | .025            | 3.2e-7  | .39     | .80     | .6      | .7e-16  | .00   | .46     |        |      |     |
| rs80826535  | 15  | 68076397  | G/T    | Prev               | 1    | .764 | .023   | 3.2e-5 | 1    | .574       | .045  | .0034  | 1                | .418  | .018  | .27         | 1    | .620 | .093  | .035  | 1      | .651      | .108  | .11   | .027            | 6e-6    | .31     | .001    | 3.9e-23 | 4.68    | .39   | .39     |        |      |     |
| rs10955770  | 15  | 68077168  | A/C    | Prev               | 1    | .763 | .023   | 2.8e-5 | 1    | .418       | .018  | .27    | 1                | .421  | .053  | .04         | 1    | .649 | .108  | .033  | 1      | .649      | .108  | .033  | .029            | 1.1e-10 | .18     | .59     | .031    | 1.9e-17 | .029  | 3.9e-23 | 1.39   | .41  |     |
| rs1076970   | 15  | 68080860  | A/C    | Prev               | 1    | .924 | .026   | 8.8e-8 | 1    | .661       | .044  | .0037  | 1                | .249  | .036  | .09         | .97  | .477 | .016  | .52   | 1      | .303      | .138  | .023  | .029            | 1.1e-10 | .18     | .59     | .031    | 1.9e-17 | .029  | 3.9e-23 | 1.39   | .41  |     |
| rs1770972   | 15  | 68084836  | G/A    | Prev               | 1    | .764 | .024   | 4.6e-5 | 1    | .419       | .017  | .25    | .98              | .309  | .037  | .16         | .99  | .661 | .110  | .036  | .026   | 2.4e-7    | 11.74 | .34   | .028            | 5.6e-11 | .028    | 6.8e-7  | .00     | .46     | .46   |         |        |      |     |
| rs2241423   | 15  | 68086538  | G/C    | Prev               | 1    | .765 | .023   | 4.1e-5 | 1    | .575       | .045  | .0036  | 1                | .418  | .017  | .25         | 1    | .630 | .111  | .096  | .026   | 1.7e-7    | .00   | .42   | .001            | 2.4e-11 | .029    | 7.8e-23 | .00     | .46     | .46   |         |        |      |     |
| rs975210    | 15  | 70364352  | G/A    | Prev               | .95  | .837 | .018   | .008   | .98  | .848       | -.014 | .54    | .92              | .828  | .016  | .66         | .95  | .839 | .045  | .62   | .014   | .019      | .00   | .68   | .005            | .3      | .00     | .018    | .00     | .58     | .38   |         |        |      |     |
| rs2277598   | 15  | 70327478  | T/C    | Prev               | 1    | .357 | -.011  | .027   | 1    | .444       | -.043 | .0058  | 1                | .721  | -.022 | .21         | 1    | .638 | .002  | .95   | 1      | .411      | .100  | .12   | -.014           | .0014   | 34.82   | .19     | -.016   | 5.7e-5  | .00   | .59     |        |      |     |
| rs8027181   | 15  | 73088669  | A/T    | Prev               | .99  | .322 | -.010  | .04    | .99  | .410       | -.042 | .0079  | .99              | .716  | -.026 | .14         | .99  | .389 | .006  | .82   | .99    | .408      | -.085 | .19   | -.014           | .0022   | 31.66   | .21     | -.020   | 1       |       |         |        |      |     |

| SNP        | Chr | Pos      | Allele | non-Hispanic white |      |      | Latino |      |      | East Asian |        |      | African American |       |       | South Asian |        |       | GERA |      |         | GIANT EUR |      |        | GERA+GIANT Meta |       |      |         |         |         |         |       |      |
|------------|-----|----------|--------|--------------------|------|------|--------|------|------|------------|--------|------|------------------|-------|-------|-------------|--------|-------|------|------|---------|-----------|------|--------|-----------------|-------|------|---------|---------|---------|---------|-------|------|
|            |     |          |        | Info               | Freq | Eff  | P      | Info | Freq | Eff        | P      | Info | Freq             | Eff   | P     | Info        | Freq   | Eff   | P    | Eff  | P       | Eff       | P    | Eff    | P               | Het   | P    |         |         |         |         |       |      |
| rs1135999  | 16  | 15131962 | A/G    | 1                  | .696 | .012 | .018   | 1    | .575 | -.015      | .34    | 1    | .570             | .006  | .7    | 1           | .770   | .045  | .14  | .609 | .032    | .63       | .010 | .028   | 6.06            | .37   | .013 | .0013   | .012    | .00011  | .00     | .48   |      |
| rs1136001  | 16  | 15131974 | G/T    | 1                  | .696 | .012 | .018   | 1    | .575 | -.015      | .34    | 1    | .570             | .006  | .7    | 1           | .770   | .045  | .14  | .609 | .032    | .63       | .010 | .028   | 6.06            | .37   | .013 | .0013   | .012    | .00011  | .00     | .49   |      |
| rs7191155  | 16  | 19800213 | T/C    | 1                  | .828 | .020 | .0018  | 1    | .856 | .011       | .48    | 1    | .780             | .014  | .48   | 1           | .893   | -.037 | .36  | 1    | .762    | .058      | .45  | .018   | .0016           | .00   | .69  | .023    | 1.6e-8  | .00     | .57     |       |      |
| rs7190603  | 16  | 19928662 | T/C    | 1                  | .860 | .026 | .00014 | .99  | .906 | -.026      | .32    | .98  | .991             | .117  | .17   | .97         | .937   | -.049 | .35  | 1    | .958    | .016      | .92  | .022   | .00076          | 40.63 | .15  | .038    | 3e-13   | .032    | 4.8e-15 | 50.33 | .073 |
| rs12444979 | 16  | 19933600 | C/T    | 1                  | .859 | .026 | .00014 | .99  | .906 | -.026      | .32    | .98  | .991             | .117  | .17   | .97         | .937   | -.049 | .35  | 1    | .958    | .016      | .92  | .022   | .00076          | 25.77 | .25  | .040    | 1.3e-17 | .034    | 2.7e-19 | 51.10 | .069 |
| rs12446534 | 16  | 19935073 | G/T    | 1                  | .859 | .025 | .0002  | 1    | .903 | -.025      | .34    | .97  | .991             | .117  | .17   | .97         | .937   | -.049 | .35  | 1    | .958    | .016      | .92  | .022   | .00076          | 24.51 | .26  | .039    | 1.1e-17 | .034    | 4.3e-19 | 49.76 | .077 |
| rs11635988 | 16  | 19944363 | A/G    | 1                  | .857 | .025 | .00021 | .98  | .894 | -.021      | .4     | .91  | .990             | .113  | .18   | .97         | .773   | -.057 | .056 | .99  | .033    | .89       | .019 | .003   | 64.00           | .025  | .040 | 6.4e-18 | .034    | 8.9e-20 | 52.42   | .062  |      |
| rs80534079 | 16  | 19975407 | C/T    | 1                  | .858 | .026 | .00016 | .99  | .894 | -.021      | .4     | .91  | .990             | .113  | .18   | .97         | .773   | -.057 | .056 | .99  | .033    | .89       | .019 | .003   | 64.00           | .025  | .040 | 6.4e-18 | .033    | 2.2e-18 | 42.17   | .003  |      |
| rs4235585  | 16  | 20255097 | C/T    | 1                  | .999 | .013 | .0021  | .99  | .873 | -.016      | .31    | .99  | .208             | -.037 | .056  | .99         | .461   | -.037 | .17  | .99  | .130    | .112      | .023 | .00012 | 9.9e-5          | .00   | .78  | .025    | 1.9e-8  | .024    | 2.2e-11 | .00   | .84  |
| rs11074446 | 16  | 20255123 | T/C    | 1                  | .999 | .013 | .0021  | .99  | .873 | -.016      | .31    | .99  | .208             | -.037 | .056  | .99         | .461   | -.037 | .17  | .99  | .130    | .112      | .023 | .00012 | 9.9e-5          | .00   | .78  | .025    | 1.9e-8  | .024    | 2.2e-11 | .00   | .84  |
| rs12597579 | 16  | 20257667 | C/T    | 1                  | .947 | .025 | .02    | .98  | .941 | .033       | .32    | .99  | .798             | .036  | .07   | .98         | .907   | .053  | .22  | 1    | .912    | .169      | .13  | .029   | .00077          | .00   | .71  | .023    | .0072   | .026    | 1.9e-5  | .00   | .79  |
| rs12597682 | 16  | 20258432 | C/T    | 1                  | .947 | .025 | .019   | .98  | .942 | .037       | .26    | .99  | .798             | .036  | .069  | .97         | .921   | .046  | .34  | 1    | .912    | .170      | .13  | .030   | .00077          | .00   | .73  | .023    | .0084   | .026    | 2.3e-5  | .00   | .81  |
| rs9652588  | 16  | 20370810 | C/T    | 1                  | .496 | .020 | 4e-5   | 1    | .607 | .010       | .52    | 1    | .864             | .033  | .15   | 1           | .552   | .007  | .8   | 1    | .369    | -.072     | .46  | .019   | 1.3e-5          | .00   | .58  | .018    | 4.3e-5  | .018    | 4.4e-9  | .00   | .72  |
| rs9652589  | 16  | 20370816 | C/T    | 1                  | .494 | .020 | 4e-5   | 1    | .606 | .010       | .52    | 1    | .864             | .033  | .15   | 1           | .571   | .013  | .63  | 1    | .363    | -.048     | .47  | .019   | 1.3e-5          | .00   | .76  | .016    | 2.3e-5  | .017    | 1.4e-9  | .00   | .83  |
| rs7195386  | 16  | 24578458 | T/C    | 1                  | .487 | .016 | .00059 | .99  | .444 | -.011      | .48    | .99  | .583             | -.011 | .5    | .99         | .221   | .009  | .9   | .012 | .00012  | .21       | .27  | .012   | .00012          | 41.27 | .28  | .013    | .00049  | .013    | 6.3e-6  | 1.70  | .41  |
| rs20504392 | 16  | 28333411 | G/A    | 1                  | .733 | .021 | .001   | .97  | .823 | -.048      | .02    | .91  | .931             | -.012 | .72   | .94         | .904   | .005  | .92  | 1    | .869    | -.083     | .47  | .023   | .00012          | .00   | .72  | .021    | 1.9e-9  | .021    | 1.8e-12 | .00   | .83  |
| rs1812066  | 16  | 28513403 | A/G    | 1                  | .967 | .015 | .0051  | .98  | .688 | -.051      | .0023  | .94  | .918             | -.073 | .015  | .97         | .914   | -.050 | .28  | .94  | .819    | -.044     | .61  | .020   | 5.2e-5          | 51.01 | .086 | .025    | 1.6e-6  | .020    | 5.2e-5  | 51.01 | .086 |
| rs62034325 | 16  | 28538640 | A/G    | 1                  | .967 | .015 | .0051  | .98  | .688 | -.051      | .0023  | .94  | .918             | -.073 | .015  | .97         | .914   | -.050 | .28  | .94  | .819    | -.044     | .61  | .020   | 5.2e-5          | 51.01 | .086 | .025    | 1.6e-6  | .020    | 5.2e-5  | 51.01 | .086 |
| rs12008514 | 16  | 28823605 | G/A    | 1                  | .967 | .015 | .0051  | .98  | .688 | -.051      | .0023  | .94  | .918             | -.073 | .015  | .97         | .914   | -.050 | .28  | .94  | .819    | -.044     | .61  | .020   | 5.2e-5          | 51.01 | .086 | .025    | 1.6e-6  | .020    | 5.2e-5  | 51.01 | .086 |
| rs1987471  | 16  | 28823666 | T/G    | 1                  | .967 | .015 | .0051  | .98  | .688 | -.051      | .0023  | .94  | .918             | -.073 | .015  | .97         | .914   | -.050 | .28  | .94  | .819    | -.044     | .61  | .020   | 5.2e-5          | 51.01 | .086 | .025    | 1.6e-6  | .020    | 5.2e-5  | 51.01 | .086 |
| rs8049439  | 16  | 28837515 | T/C    | 1                  | .572 | .045 | .004   | .85  | .727 | -.037      | .053   | 1    | .565             | -.019 | .44   | .87         | .711   | -.087 | .25  | .99  | .771    | -.070     | .36  | .026   | 2.9e-7          | .00   | .45  | .030    | 1.6e-21 | .027    | 4.7e-27 | 2.66  | .4   |
| rs80624005 | 16  | 28837906 | A/G    | 1                  | .590 | .052 | .00091 | .98  | .866 | -.030      | .0011  | .99  | .713             | -.034 | .23   | .97         | .768   | -.065 | .39  | .99  | .771    | -.070     | .36  | .026   | 2.9e-7          | .00   | .45  | .030    | 1.6e-21 | .027    | 4.7e-27 | 2.66  | .4   |
| rs62036624 | 16  | 28839930 | G/T    | 1                  | .620 | .020 | 4.2e-5 | 1    | .590 | -.052      | .00086 | 1    | .869             | -.083 | .0006 | 1           | .896   | -.072 | .086 | .99  | .771    | -.070     | .36  | .026   | 2.9e-7          | .00   | .45  | .030    | 1.6e-21 | .027    | 4.7e-27 | 2.66  | .4   |
| rs4788102  | 16  | 28848668 | G/A    | 1                  | .601 | .050 | .0015  | 1    | .601 | -.050      | .0015  | 1    | .869             | -.083 | .0006 | 1           | .896   | -.072 | .086 | .99  | .771    | -.070     | .36  | .026   | 2.9e-7          | .00   | .45  | .030    | 1.6e-21 | .027    | 4.7e-27 | 2.66  | .4   |
| rs7498665  | 16  | 28883241 | A/G    | 1                  | .601 | .050 | .0015  | 1    | .601 | -.050      | .0015  | 1    | .869             | -.083 | .0006 | 1           | .896   | -.072 | .086 | .99  | .771    | -.070     | .36  | .026   | 2.9e-7          | .00   | .45  | .030    | 1.6e-21 | .027    | 4.7e-27 | 2.66  | .4   |
| rs7353597  | 16  | 28883241 | C/T    | 1                  | .601 | .050 | .0015  | 1    | .601 | -.050      | .0015  | 1    | .869             | -.083 | .0006 | 1           | .896   | -.072 | .086 | .99  | .771    | -.070     | .36  | .026   | 2.9e-7          | .00   | .45  | .030    | 1.6e-21 | .027    | 4.7e-27 | 2.66  | .4   |
| rs7353597  | 16  | 28883241 | C/T    | 1                  | .601 | .050 | .0015  | 1    | .601 | -.050      | .0015  | 1    | .869             | -.083 | .0006 | 1           | .896   | -.072 | .086 | .99  | .771    | -.070     | .36  | .026   | 2.9e-7          | .00   | .45  | .030    | 1.6e-21 | .027    | 4.7e-27 | 2.66  | .4   |
| rs4885190  | 16  | 28889486 | A/G    | 1                  | .591 | .052 | .00087 | .94  | .862 | -.082      | .00042 | 1    | .723             | -.043 | .13   | .91         | .756   | -.069 | .43  | .99  | .771    | -.070     | .36  | .026   | 2.9e-7          | .00   | .45  | .030    | 1.6e-21 | .027    | 4.7e-27 | 2.66  | .4   |
| rs78184597 | 16  | 28921809 | T/C    | 1                  | .726 | .041 | .15    | .91  | .756 | -.069      | .43    | .99  | .771             | -.070 | .36   | .026        | 2.9e-7 | .00   | .45  | .030 | 1.6e-21 | .027      | .75  | .023   | 6.1e-5          | .00   | .81  | .031    | 3.1e-23 | .029    | 8.6e-29 | 63.25 | .018 |
| rs29048580 | 16  | 28944396 | C/G    | 1                  | .367 | .045 | .005   | .94  | .114 | .064       | .01    | .99  | .088             | .094  | .038  | .85         | .212   | .027  | .75  | .99  | .771    | -.070     | .36  | .026   | 2.9e-7          | .00   | .45  | .030    | 1.6e-21 | .027    | 4.7e-27 | 2.66  | .4   |
| rs29048580 | 16  | 28944396 | C/G    | 1                  | .367 | .045 | .005   | .94  | .114 | .064       | .01    | .99  | .088             | .094  | .038  | .85         | .212   | .027  | .75  | .99  | .771    | -.070     | .36  | .026   | 2.9e-7          | .00   | .45  | .030    | 1.6e-21 | .027    | 4.7e-27 | 2.66  | .4   |
| rs29048580 | 16  | 28944396 | C/G    | 1                  | .367 | .045 | .005   | .94  | .114 | .064       | .01    | .99  | .088             | .094  | .038  | .85         | .212   | .027  | .75  | .99  | .771    | -.070     | .36  | .026   | 2.9e-7          | .00   | .45  | .030    | 1.6e-21 | .027    | 4.7e-27 | 2.66  | .4   |
| rs29048580 | 16  | 28944396 | C/G    | 1                  | .367 | .045 | .005   | .94  | .114 | .064       | .01    | .99  | .088             | .094  | .038  | .85         | .212   | .027  | .75  | .99  | .771    | -.070     | .36  | .026   | 2.9e-7          | .00   | .45  | .030    | 1.6e-21 | .027    | 4.7e-27 | 2.66  | .4   |
| rs29048580 | 16  | 28944396 | C/G    | 1                  | .367 | .045 | .005   | .94  | .114 | .064       | .01    | .99  | .088             | .094  | .038  | .85         | .212   | .027  | .75  | .99  | .771    | -.070     | .36  | .026   | 2.9e-7          | .00   | .45  | .030    | 1.6e-21 | .027    | 4.7e-27 | 2.66  | .4   |
| rs29048580 | 16  | 28944396 | C/G    | 1                  | .367 | .045 | .005   | .94  | .114 | .064       | .01    | .99  | .088             | .094  | .038  | .85         | .212   | .027  | .75  | .99  | .771    | -.070     | .36  | .026   | 2.9e-7          | .00   | .45  | .030    | 1.6e-21 | .027    | 4.7e-27 | 2.66  | .4   |
| rs29048580 | 16  | 28944396 | C/G    | 1                  | .367 | .045 | .005   | .94  | .114 | .064       | .01    | .99  | .088             | .094  | .038  | .85         | .212   | .027  | .75  | .99  | .771    | -.070     | .36  | .026   | 2.9e-7          | .00   | .45  | .030    | 1.6e-21 | .027    | 4.7e-27 | 2.66  | .4   |
| rs29048580 | 16  | 28944396 | C/G    | 1                  | .367 | .045 | .005   | .94  | .114 | .064       | .01    | .99  | .088             | .094  | .038  | .85         | .212   | .027  | .75  | .99  | .771    | -.070     | .36  | .026   | 2.9e-7          | .00   | .45  | .030    | 1.6e-21 | .027    | 4.7e-27 | 2.66  | .4   |
| rs29048580 | 16  | 28944396 | C/G    | 1                  | .367 | .045 | .005   | .94  | .114 | .064       | .01    | .99  | .088             | .094  | .038  | .85         | .212   | .027  | .75  | .99  | .771    | -.070     | .36  | .026   | 2.9e-7          | .00   | .45  | .030    | 1.6e-21 | .027    | 4.7e-27 | 2.66  | .4   |
| rs29048580 | 16  | 28944396 | C/G    | 1                  | .367 | .045 | .005   | .94  | .114 | .064       | .01    | .99  | .088             | .094  | .038  | .85         | .212   | .027  | .75  | .99  | .771    | -.070     | .36  | .026   | 2.9e-7          | .00   | .45  | .030    | 1.6e-21 | .027    | 4.7e-27 | 2.66  | .4   |
| rs29048580 | 16  | 28944396 | C/G    | 1                  | .367 | .045 | .005   | .94  | .114 | .064       | .01    | .99  | .088             | .094  | .038  | .85         | .212   | .027  | .75  | .99  | .771    | -.070     | .36  | .026   | 2.9e-7          | .00   | .45  | .030    | 1.6e-21 | .027    | 4.7e-27 | 2.66  | .4   |
| rs29048580 | 16  | 28944396 | C/G    | 1                  | .367 | .045 | .005   | .94  | .114 | .064       | .01    | .99  | .088             | .094  | .038  | .85         | .212   | .027  | .75  | .99  | .771    | -.070     | .36  | .026   | 2.9e-7          | .00   | .45  | .030    | 1.6e-21 | .027    | 4.7e-27 | 2.66  | .4   |
| rs29048580 | 16  | 28944396 | C/G    | 1                  | .367 | .045 | .005   | .94  | .114 | .064       | .01    | .99  | .088             | .094  | .038  | .85         | .212   | .027  |      |      |         |           |      |        |                 |       |      |         |         |         |         |       |      |

| SNP             | Chr | Pos      | Allele | non-Hispanic white |      |      | Latino |        |      | East Asian |       |        | African American |      |       | South Asian |      |      | GERA  |      |       | GIANT EUR |        |       | GERA+GIANT Meta |         |       |       |        |         |       |         |       |        |
|-----------------|-----|----------|--------|--------------------|------|------|--------|--------|------|------------|-------|--------|------------------|------|-------|-------------|------|------|-------|------|-------|-----------|--------|-------|-----------------|---------|-------|-------|--------|---------|-------|---------|-------|--------|
|                 |     |          |        | Info               | Freq | Eff  | P      | Info   | Freq | Eff        | P     | Info   | Freq             | Eff  | P     | Info        | Freq | Eff  | P     | Eff  | P     | Eff       | P      | Eff   | P               | Het     | P     |       |        |         |       |         |       |        |
| rs6499129       | 16  | 67458251 | A/C    | Prev               | .99  | .905 | -.023  | .0048  | 1    | .892       | -.007 | .77    | .97              | .978 | .007  | .22         | 1    | .461 | -.002 | .93  | .99   | .824      | -.080  | .36   | -.013           | .063    | -.016 | .0018 | .00    | .53     |       |         |       |        |
| rs2307022       | 16  | 68381978 | A/G    | Prev               | .99  | .342 | -.000  | 1      | .99  | .300       | -.014 | .41    | .97              | .181 | -.016 | .43         | .99  | .249 | -.021 | .49  | .99   | .358      | -.098  | .16   | -.002           | .7      | .00   | .46   | .016   | 9.9e-7  |       |         |       |        |
| rs8890715       | 16  | 69556715 | C/T    | Prev               | .98  | .574 | -.021  | 1.9e-5 | .98  | .484       | -.032 | .15    | .91              | .704 | -.061 | .035        | .96  | .729 | -.055 | .47  | .98   | .73e-5    | 58.69  | .046  | -.017           | 1.7e-10 | .00   | .49   | .016   | 1.7e-10 |       |         |       |        |
| rs617447555     | 16  | 71885423 | A/G    | Prev               | .98  | .804 | -.018  | .003   | .9   | .826       | -.022 | .3     | .96              | .787 | -.021 | .27         | .85  | .937 | -.098 | .081 | .99   | .781      | .023   | .77   | .019            | .00048  | .00   | .73   | .013   | .0039   |       |         |       |        |
| rs62051555      | 16  | 72830539 | C/G    | Prev               | .99  | .962 | .006   | .63    | .97  | .977       | .065  | .21    | .76              | .996 | -.057 | .68         | .92  | .987 | .015  | .9   | .99   | .995      | .702   | .15   | .010            | .42     | .00   | .71   | .038   | 5.7e-5  |       |         |       |        |
| rs756717        | 16  | 72996162 | G/A    | Prev               | .98  | .611 | -.018  | .00021 | .98  | .624       | -.029 | .076   | .97              | .96  | .773  | -.052       | .086 | .96  | .745  | .127 | .1    | .018      | 8.1e-5 | 48.54 | .1              | .013    | 5e-5  | .015  | 2.4e-8 | 40.56   | .13   |         |       |        |
| rs4788694       | 16  | 73070083 | C/G    | Prev               | .96  | .555 | .007   | .18    | .95  | .396       | .013  | .41    | .92              | .217 | -.037 | .059        | .86  | .442 | -.005 | .94  | .908  | .086      | .00    | .42   | .008            | .059    | .008  | .011  | .00    | .56     |       |         |       |        |
| rs889512        | 16  | 75242012 | C/G    | Prev               | .95  | .891 | -.002  | .79    | .94  | .908       | -.064 | .02    | .77              | .960 | -.014 | .76         | .85  | .912 | -.024 | .62  | .94   | .887      | .207   | .087  | -.006           | .39     | 53.90 | .07   | .408   | .059    |       |         |       |        |
| rs1424233       | 16  | 79882751 | T/C    | Prev               | 1    | .488 | -.002  | .71    | 1    | .604       | -.009 | .57    | 1                | .657 | -.005 | .74         | 1    | .674 | -.015 | .82  | .703  | .49       | .00    | .5    | .006            | .089    | .005  | .082  | .00    | .59     |       |         |       |        |
| rs12443634      | 16  | 81524274 | A/C    | Prev               | .85  | .277 | -.007  | .23    | .94  | .202       | -.020 | .31    | 1                | .177 | .020  | .33         | .92  | .296 | -.017 | .56  | .81   | .237      | -.048  | .77   | .005            | .35     | .00   | .52   | .002   | .72     | .003  |         |       |        |
| rs2925979       | 16  | 81534790 | T/C    | Prev               | .84  | .294 | .005   | .36    | 1    | .224       | -.027 | .14    | .95              | .412 | -.012 | .48         | 1    | .309 | -.011 | .68  | .8    | .304      | -.022  | .78   | .001            | .91     | .00   | .44   | -.001  | .74     | .00   | .58     |       |        |
| rs455677        | 16  | 89644001 | T/C    | Prev               | .58  | .938 | -.019  | .14    | .87  | .851       | -.040 | .079   | .5               | .769 | -.022 | .41         | .68  | .930 | -.012 | .66  | .97   | .498      | -.048  | .47   | .001            | .8      | .00   | .91   | .000   | .92     | .001  | .96     |       |        |
| rs741677        | 16  | 463843   | A/G    | Prev               | .98  | .566 | .001   | .77    | .98  | .511       | .008  | .61    | .98              | .699 | -.003 | .87         | .98  | .310 | -.012 | .66  | .97   | .498      | -.048  | .47   | .001            | .8      | .00   | .91   | .000   | .92     | .001  | .96     |       |        |
| rs9914578       | 17  | 2005136  | C/G    | Prev               | .99  | .803 | -.000  | .95    | .95  | .766       | -.002 | .91    | .95              | .781 | -.002 | .9          | .98  | .505 | -.018 | .47  | .99   | .659      | .032   | .65   | -.001           | .87     | .00   | .95   | -.002  | 9e-8    | .00   | .89     |       |        |
| rs903160        | 17  | 2091765  | C/T    | Prev               | 1    | .693 | -.001  | .9     | 1    | .682       | -.005 | .78    | 1                | .662 | -.015 | .37         | 1    | .526 | -.008 | .75  | 1     | .574      | .134   | .046  | -.002           | .71     | 17.65 | .3    | -.007  | .085    | -.014 | 1e-5    |       |        |
| rs2281727       | 17  | 2117945  | A/G    | Prev               | 1    | .650 | -.002  | .73    | .99  | .656       | -.002 | .75    | .99              | .740 | -.004 | .81         | .98  | .582 | -.029 | .26  | .99   | .611      | .106   | .12   | -.002           | .58     | .00   | .45   | -.011  | 2.7e-5  | 41.38 | .13     |       |        |
| rs1885987       | 17  | 2203025  | T/G    | Prev               | 1    | .618 | -.001  | .86    | 1    | .595       | .012  | .46    | 1                | .882 | .042  | .27         | 1    | .752 | .042  | .57  | .000  | .92       | .00    | .67   | .004            | .26     | .003  | .35   | .00    | .73     | .00   | .73     |       |        |
| rs35400274      | 17  | 4803711  | G/A    | Prev               | .89  | .855 | -.017  | .018   | .99  | .816       | -.002 | .91    | .79              | .906 | -.039 | .2          | .99  | .658 | .013  | .62  | .77   | .882      | -.208  | .062  | -.015           | .016    | 23.39 | .27   | -.010  | .048    | -.012 | .0024   | 11.49 | .34    |
| rs6065          | 17  | 4836381  | C/T    | Prev               | 1    | .917 | -.018  | .035   | 1    | .873       | -.030 | .2     | 1                | .936 | -.052 | .11         | 1    | .785 | -.002 | .94  | 1     | .928      | -.066  | .59   | -.021           | .007    | .00   | .8    | -.018  | .011    | -.019 | .00021  | .00   | .89    |
| rs3026101       | 17  | 5280440  | T/C    | Prev               | 1    | .697 | -.021  | 3.8e-5 | 1    | .646       | -.023 | .15    | 1                | .383 | -.039 | .018        | 1    | .757 | .012  | .7   | 1     | .569      | -.043  | .49   | -.022           | 1.8e-6  | .00   | .65   | -.018  | 3.5e-8  | -.020 | 2.7e-13 | .00   | .71    |
| rs1000940       | 17  | 5283252  | A/G    | Prev               | .99  | .693 | -.020  | .00012 | .99  | .646       | -.022 | .18    | .99              | .383 | -.035 | .032        | .98  | .763 | .005  | .86  | 1     | .569      | -.044  | .49   | -.021           | 7.8e-6  | .00   | .79   | -.019  | 1.3e-8  | -.020 | 6.2e-13 | .00   | .88    |
| rs1071648       | 17  | 5326089  | C/T    | Prev               | .99  | .727 | -.020  | .00019 | .99  | .631       | -.024 | .14    | .98              | .230 | -.050 | .0083       | .99  | .764 | -.028 | .35  | .98   | .475      | .090   | .16   | -.023           | 2.2e-6  | .00   | .48   | -.014  | .00073  | -.017 | 1.9e-8  | 12.02 | .34    |
| rs12761         | 17  | 5326145  | G/A    | Prev               | 1    | .729 | -.020  | .00002 | 1    | .634       | -.023 | .16    | .98              | .225 | -.051 | .0071       | 1    | .766 | -.027 | .36  | 1     | .480      | -.084  | .19   | -.023           | 2.5e-6  | .00   | .48   | -.014  | .00013  | -.018 | 3.3e-8  | 7.12  | .37    |
| rs4646404       | 17  | 17420199 | G/A    | Prev               | .72  | .648 | -.003  | .56    | .94  | .741       | -.014 | .44    | .75              | .862 | -.047 | .073        | .9   | .863 | .077  | .06  | .62   | .836      | -.025  | .81   | -.005           | .37     | 42.34 | .14   | -.004  | .14     | 28.04 | .22     | .004  |        |
| rs4925114       | 17  | 17711270 | A/G    | Prev               | .86  | .382 | .007   | .21    | .99  | .516       | -.000 | .98    | .81              | .877 | -.026 | .33         | .98  | .560 | -.006 | .81  | .8    | .693      | -.148  | .057  | -.004           | .42     | 28.01 | .23   | -.014  | .00051  | -.007 | .031    | 63.29 | .018   |
| rs203462        | 17  | 19812541 | T/C    | Prev               | 1    | .622 | .008   | .11    | 1    | .598       | -.019 | .22    | 1                | .799 | .015  | .44         | 1    | .432 | -.020 | .44  | 1     | .698      | -.116  | .1    | .005            | .3      | 41.10 | .15   | .012   | .00021  | .009  | .0025   | 39.29 | .14    |
| rs2108787       | 17  | 19861458 | C/T    | Prev               | 1    | .623 | .008   | .13    | 1    | .600       | -.021 | .2     | 1                | .800 | .014  | .49         | 1    | .445 | -.026 | .31  | 1     | .700      | -.118  | .097  | .004            | .36     | 46.24 | .11   | .011   | .00051  | .009  | .0065   | 44.50 | .11    |
| rs406044        | 17  | 21261560 | C/T    | Prev               | .54  | .512 | .015   | .023   | 1    | .547       | -.000 | .98    | .5               | .444 | .009  | .68         | 1    | .350 | -.023 | .39  | .49   | .455      | -.071  | .46   | .010            | .064    | .00   | .52   | .016   | 1.4e-7  | -.015 | 3.2e-8  | .00   | .54    |
| rs4640244       | 17  | 21284223 | A/G    | Prev               | .5   | .643 | -.007  | .3     | 1    | .684       | -.007 | .66    | .45              | .637 | -.028 | .25         | .8   | .813 | .009  | .8   | .45   | .685      | -.058  | .58   | -.008           | .18     | .00   | .89   | -.016  | 4.6e-6  | -.014 | 3e-8    | .00   | .82    |
| rs180950758     | 17  | 29036425 | A/T    | Prev               | .88  | .886 | -.012  | .13    | .88  | .855       | -.008 | .74    | .87              | .800 | .014  | .57         | .83  | .826 | .012  | .75  | .84   | .763      | .066   | .42   | -.008           | .25     | .00   | .7    | -.010  | .085    | -.009 | .039    | .00   | .82    |
| rs17826212      | 17  | 29161845 | G/A    | Prev               | 1    | .893 | -.012  | .12    | 1    | .861       | -.016 | .46    | 1                | .865 | .009  | .69         | 1    | .925 | .007  | .88  | 1     | .748      | .042   | .57   | -.010           | .16     | .00   | .83   | -.016  | .021    | -.013 | .0086   | .00   | .86    |
| rs3766419       | 17  | 29164023 | C/A    | Prev               | 1    | .613 | -.004  | .38    | 1    | .617       | -.013 | .42    | 1                | .766 | .018  | .34         | 1    | .290 | -.024 | .38  | 1     | .579      | .028   | .66   | -.004           | .36     | .00   | .66   | .004   | .11     | .00   | .79     | .00   | .79    |
| rs3760419       | 17  | 29247715 | G/A    | Prev               | 1    | .624 | -.005  | .35    | 1    | .642       | -.011 | .51    | 1                | .770 | .020  | .3          | 1    | .566 | -.015 | .55  | 1     | .619      | -.003  | .96   | -.004           | .37     | .00   | .74   | -.004  | .12     | .00   | .86     | .00   | .86    |
| rs2306590       | 17  | 34854280 | G/A    | Prev               | 1    | .593 | .018   | .00023 | 1    | .664       | .052  | .0017  | .98              | .679 | .020  | .25         | 1    | .885 | -.003 | .95  | 1     | .662      | .009   | .99   | .020            | 9.1e-6  | 5.52  | .38   | .018   | 3.2e-6  | .019  | 9.8e-11 | .00   | .49    |
| rs2857310       | 17  | 34914365 | G/A    | KP                 | .98  | .561 | .023   | 3.3e-6 | .98  | .628       | .056  | .00062 | .99              | .639 | .027  | .11         | .97  | .688 | .017  | .53  | .97   | .636      | .007   | .91   | .025            | 1.3e-8  | .00   | .41   | .016   | 1.1e-5  | .019  | 2.6e-12 | 24.24 | .25    |
| rs12510665      | 17  | 34914787 | T/C    | Prev               | 1    | .593 | .019   | .00012 | .99  | .664       | .052  | .0016  | 1                | .681 | .020  | .23         | 1    | .862 | .023  | .52  | 1     | .644      | .006   | .93   | .021            | 1.8e-6  | .00   | .43   | .016   | 2.4e-7  | .018  | 2.7e-12 | .00   | .45    |
| rs11658063      | 17  | 36103872 | C/G    | Prev               | .97  | .401 | -.001  | .83    | 1    | .351       | -.013 | .44    | .84              | .275 | -.004 | .81         | 1    | .393 | .022  | .38  | 1     | .377      | -.234  | .28   | .012            | .3      | .00   | .75   | -.022  | .019    | -.018 | .012    | .00   | .83    |
| rs2123685       | 17  | 38053889 | C/T    | Prev               | 1    | .962 | .014   | .26    | 1    | .970       | -.000 | .99    | .96              | .986 | -.040 | .77         | .99  | .982 | .009  | .49  | 1     | .977      | -.234  | .28   | .012            | .3      | .00   | .75   | -.022  | .019    | -.018 | .012    | .00   | .83    |
| rs22305016      | 17  | 38240216 | C/T    | KP                 | 1    | .922 | .001   | 3e-11  | 1    | .971       | -.029 | .14    | 1                | .969 | .010  | .87         | .99  | .992 | -.456 | .24  | .99   | .992      | -.456  | .24   | .035            | 5.9e-10 | 62.91 | .044  | .006   | .6      | -.036 | 2.5e-7  | 79.87 | .00053 |
| rs11052097      | 17  | 45310717 | C/T    | Prev               | .98  | .612 | -.014  | .0049  | .98  | .647       | -.022 | .17    | 1                | .611 | .025  | .13         | .96  | .649 | -.029 | .28  | .97   | .592      | -.074  | .26   | -.012           | .0058   | 42.31 | .14   | -.013  | 6.4e-5  | -.013 | 1.5e-6  | 28.03 | .22    |
| chr17:40126492D | 17  | 45794706 | A/G    | Prev               | .86  | .327 | -.017  | .0014  | .87  | .408       | -.016 | .39    | .84              | .207 | .045  | .18         | .79  | .351 | .052  | .49  | .020  | 6.6e-5    | .00    | .75   | .013            | 1.5e-5  | .00   | .75   | .013   | 1.5e-5  | -.016 | 5.8e-9  | .00   | .76    |
| rs6040108       | 17  | 46264923 | AG/A   | KP                 | 1    | .898 | -.038  | 1.4e-6 | .99  | .918       | -.014 | .62    | .98              | .813 | -.064 | .018        | 1    | .862 | -.185 | .053 | -.042 | 3.6e-9    | 51.43  | .083  | -.024           | 9e-5    | .00   | .73   | -.016  | 3.6e-9  | 51.43 | .083    | .00   | .76    |
| rs9299          | 17  | 46292923 | C/T    | Prev               | 1    | .287 | -.013  | .014   | .99  | .255       | .008  | .65    | 1                | .248 | -.046 | .013        | .98  | .303 | -.004 | .02  | 1     | .209      | .054   | .51   | .013            | .0084   | 64.64 | .023  | .017   | 3.6e-7  | .017  | 1.2e-8  | 58.22 | .035   |
| rs4             |     |          |        |                    |      |      |        |        |      |            |       |        |                  |      |       |             |      |      |       |      |       |           |        |       |                 |         |       |       |        |         |       |         |       |        |

| SNP        | Chr | Pos      | Allele | non-Hispanic white |      |      | Latino |         |      | East Asian |      |       | African American |      |      | South Asian |      |      | GERA |      |      | GIANT EUR |       |      | GERA+GIANT Meta |         |       |         |       |         |         |         |       |         |       |      |
|------------|-----|----------|--------|--------------------|------|------|--------|---------|------|------------|------|-------|------------------|------|------|-------------|------|------|------|------|------|-----------|-------|------|-----------------|---------|-------|---------|-------|---------|---------|---------|-------|---------|-------|------|
|            |     |          |        | Info               | Freq | Eff  | P      | Info    | Freq | Eff        | P    | Info  | Freq             | Eff  | P    | Info        | Freq | Eff  | P    | Eff  | P    | Eff       | P     | Eff  | P               | Eff     | P     |         |       |         |         |         |       |         |       |      |
| rs7239883  | 18  | 40147671 | G/A    | Prev               | .98  | .386 | .014   | .0064   | .97  | .320       | .045 | .0071 | .99              | .317 | .007 | .68         | .97  | .414 | .019 | .47  | .96  | .237      | .028  | .71  | .014            | .0014   | 24.26 | .26     | .016  | 1.6e-7  | .016    | 6.8e-10 | 7.62  | .37     |       |      |
| rs1518170  | 18  | 40708905 | T/C    | Prev               | .99  | .372 | .017   | .00053  | .99  | .508       | .006 | .71   | .99              | .466 | .025 | .12         | .98  | .433 | .020 | .43  | .97  | .610      | .006  | .93  | .015            | .00043  | .00   | .39     | .011  | .0057   | .012    | 1.2e-5  | .00   | .39     |       |      |
| rs1518142  | 18  | 40721490 | T/C    | Prev               | 1    | .377 | .017   | .00044  | 1    | .509       | .006 | .63   | 1                | .461 | .025 | .11         | .99  | .398 | .010 | .43  | 1    | .618      | .002  | .98  | .016            | .00025  | .00   | .73     | .011  | .0021   | .012    | 2.4e-6  | .00   | .75     |       |      |
| rs7231852  | 18  | 40761976 | G/A    | Prev               | 1    | .747 | .014   | .012    | 1    | .748       | .021 | .26   | .99              | .643 | .019 | .69         | .99  | .834 | .039 | .26  | 1    | .813      | .003  | .98  | .014            | .0066   | .00   | .79     | .015  | .00032  | .015    | 6.8e-6  | .00   | .79     |       |      |
| rs4129322  | 18  | 50605642 | G/A    | Prev               | 1    | .915 | .003   | .74     | .99  | .912       | .049 | .071  | .99              | .643 | .019 | .66         | .98  | .743 | .027 | .35  | 1    | .843      | .002  | .3   | .005            | .44     | 24.80 | .26     | .011  | .12     | .008    | .1      | 10.60 | .35     |       |      |
| rs7243785  | 18  | 52475162 | A/G    | Prev               | 1    | .771 | .015   | .0097   | 1    | .726       | .027 | .12   | .99              | .622 | .020 | .21         | 1    | .816 | .012 | .71  | 1    | .769      | .008  | .91  | .016            | .002    | .00   | .88     | .018  | .7e-5   | .017    | 5e-7    | .00   | .93     |       |      |
| rs8092503  | 18  | 52479487 | A/G    | Prev               | 1    | .771 | .015   | .01     | 1    | .726       | .026 | .13   | 1                | .619 | .019 | .23         | 1    | .816 | .013 | .7   | 1    | .769      | .008  | .92  | .015            | .0023   | .00   | .87     | .014  | 5.8e-5  | .015    | 4.9e-7  | .00   | .94     |       |      |
| rs7243357  | 18  | 56883319 | T/C    | Prev               | .98  | .823 | .003   | .66     | .99  | .875       | .022 | .23   | .94              | .835 | .000 | .98         | .98  | .773 | .048 | .58  | .97  | .773      | .048  | .58  | .002            | .39e-8  | .015  | 8.7e-6  | .015  | 8.7e-6  | .015    | 5.8e-5  | .015  | .036    |       |      |
| rs7234864  | 18  | 5734857  | T/C    | Prev               | .99  | .734 | .037   | 6.8e-12 | .98  | .809       | .032 | .1    | .97              | .834 | .069 | .0014       | .98  | .540 | .009 | .71  | .98  | .618      | .042  | .55  | .037            | 8.1e-14 | 14.74 | .32     | .046  | 8.9e-40 | .043    | 1.1e-50 | 23.88 | .24     |       |      |
| rs17700144 | 18  | 57811982 | G/A    | Prev               | 1    | .785 | .040   | 7.2e-12 | .97  | .876       | .051 | .029  | 1                | .961 | .066 | .1          | .93  | .951 | .007 | .9   | 1    | .663      | .077  | .27  | .045            | 6.2e-48 | .050  | 6.7e-58 | .046  | 6.7e-58 | .046    | 6.7e-58 | .046  | .73     |       |      |
| rs6567160  | 18  | 57829135 | T/C    | Prev               | 1    | .766 | .044   | 5e-15   | .99  | .847       | .062 | .004  | 1                | .828 | .061 | .0041       | .98  | .633 | .041 | .55  | .99  | .633      | .041  | .55  | .045            | 2.2e-48 | .050  | 6.7e-58 | .046  | 6.7e-58 | .046    | 6.7e-58 | .046  | .35     |       |      |
| rs6663121  | 18  | 57838401 | G/A    | Prev               | 1    | .765 | .044   | 6.6e-15 | 1    | .840       | .052 | .013  | 1                | .831 | .064 | .0025       | 1    | .634 | .043 | .55  | 1    | .634      | .043  | .55  | .044            | 7.1e-18 | .00   | .56     | .056  | 8.8e-53 | .052    | 1.9e-69 | .050  | .28     |       |      |
| rs571312   | 18  | 57839769 | C/A    | Prev               | 1    | .765 | .044   | 6.2e-15 | 1    | .840       | .056 | .0081 | 1                | .832 | .065 | .0022       | 1    | .634 | .042 | .67  | 1    | .634      | .042  | .67  | .045            | 8.8e-53 | .052  | 1.9e-69 | .050  | 7.0e-70 | .049    | 8.4e-39 | .050  | .36     |       |      |
| rs591166   | 18  | 57841589 | T/C    | Prev               | .99  | .563 | .016   | .00008  | .99  | .634       | .002 | .91   | .99              | .790 | .046 | .019        | .99  | .281 | .019 | .5   | .97  | .452      | .044  | .5   | .016            | .00021  | .00   | .41     | .027  | 1.2e-18 | .024    | 1.3e-20 | 37.48 | .16     |       |      |
| rs12967135 | 18  | 57849023 | G/A    | Prev               | 1    | .766 | .045   | 7.2e-16 | 1    | .847       | .059 | .0057 | 1                | .829 | .069 | .00098      | .97  | .722 | .026 | .37  | 1    | .635      | .034  | .63  | .046            | 2e-19   | .00   | .49     | .057  | 2.2e-47 | .053    | 9.8e-65 | 14.45 | .32     |       |      |
| rs538656   | 18  | 57850422 | G/T    | Prev               | 1    | .764 | .045   | 1.4e-15 | 1    | .835       | .055 | .009  | 1                | .826 | .065 | .00018      | .99  | .631 | .039 | .14  | 1    | .634      | .029  | .68  | .046            | 3.1e-19 | .00   | .68     | .059  | 7.8e-45 | .053    | 6.7e-62 | 22.16 | .27     |       |      |
| rs17783313 | 18  | 57851097 | T/C    | Prev               | 1    | .766 | .045   | 6.5e-16 | 1    | .847       | .059 | .0055 | 1                | .829 | .069 | .00097      | .98  | .633 | .039 | .14  | 1    | .634      | .029  | .68  | .046            | 3.1e-19 | .00   | .68     | .059  | 7.8e-45 | .053    | 6.7e-62 | 22.16 | .27     |       |      |
| rs10871777 | 18  | 57851763 | A/G    | Prev               | 1    | .762 | .044   | 2.5e-15 | 1    | .834       | .062 | .0027 | 1                | .815 | .069 | .0007       | 1    | .596 | .034 | .2   | 1    | .596      | .007  | .91  | .046            | 4.6e-19 | .00   | .64     | .055  | 6.7e-52 | .052    | 8e-70   | .050  | .43     |       |      |
| rs476828   | 18  | 57852587 | T/C    | Prev               | 1    | .761 | .044   | 2.4e-15 | 1    | .845       | .060 | .0047 | 1                | .829 | .069 | .00086      | .99  | .743 | .040 | .17  | 1    | .633      | .034  | .62  | .046            | 2.6e-19 | .00   | .52     | .054  | 4.9e-51 | .052    | 5.6e-69 | .052  | .41     |       |      |
| rs11152213 | 18  | 57852948 | A/C    | Prev               | 1    | .763 | .044   | 2.4e-15 | 1    | .845       | .060 | .0047 | 1                | .829 | .069 | .00086      | .99  | .743 | .040 | .17  | 1    | .633      | .034  | .62  | .046            | 2.6e-19 | .00   | .52     | .054  | 4.9e-51 | .052    | 5.6e-69 | .052  | .41     |       |      |
| rs8089364  | 18  | 57858829 | T/C    | Prev               | 1    | .734 | .044   | 3.2e-16 | 1    | .817       | .052 | .0091 | 1                | .825 | .066 | .0017       | 1    | .857 | .067 | .058 | 1    | .636      | .066  | .34  | .046            | 4e-20   | 12.25 | .34     | .051  | 3.1e-49 | .049    | 3.5e-66 | .050  | .43     |       |      |
| rs12969709 | 18  | 57859663 | C/A    | Prev               | 1    | .736 | .044   | 3.3e-16 | 1    | .818       | .049 | .013  | 1                | .826 | .066 | .0017       | 1    | .860 | .085 | .02  | 1    | .639      | .058  | .4   | .046            | 1.6e-20 | 13.42 | .33     | .052  | 3.4e-44 | .050    | 1.3e-63 | 10.34 | .35     |       |      |
| rs921971   | 18  | 57861663 | T/C    | Prev               | 1    | .735 | .044   | 3.3e-16 | 1    | .818       | .049 | .013  | 1                | .826 | .066 | .0017       | 1    | .860 | .085 | .02  | 1    | .639      | .058  | .4   | .046            | 1.6e-20 | 13.42 | .33     | .052  | 3.4e-44 | .050    | 1.3e-63 | 10.34 | .35     |       |      |
| rs11663816 | 18  | 57861663 | C/A    | Prev               | 1    | .735 | .044   | 3.3e-16 | 1    | .818       | .049 | .013  | 1                | .826 | .066 | .0017       | 1    | .860 | .085 | .02  | 1    | .639      | .058  | .4   | .046            | 1.6e-20 | 13.42 | .33     | .052  | 3.4e-44 | .050    | 1.3e-63 | 10.34 | .35     |       |      |
| rs12970134 | 18  | 57884750 | T/C    | Prev               | 1    | .736 | .044   | 3e-16   | 1    | .821       | .046 | .021  | 1                | .831 | .072 | .0007       | 1    | .889 | .087 | .031 | 1    | .640      | .063  | .36  | .046            | 5.1e-19 | 21.01 | .28     | .050  | 4.7e-47 | .048    | 1.7e-64 | 11.17 | .34     |       |      |
| rs9944545  | 18  | 57884750 | G/A    | Prev               | 1    | .736 | .044   | 3e-16   | 1    | .821       | .046 | .021  | 1                | .831 | .072 | .0007       | 1    | .889 | .087 | .031 | 1    | .640      | .063  | .36  | .046            | 5.1e-19 | 21.01 | .28     | .050  | 4.7e-47 | .048    | 1.7e-64 | 11.17 | .34     |       |      |
| rs17068442 | 18  | 57958244 | C/T    | Prev               | .99  | .708 | .028   | 7.9e-8  | .97  | .780       | .025 | .19   | .98              | .878 | .060 | .014        | .96  | .482 | .016 | .53  | .98  | .651      | .104  | .12  | .028            | 7e-9    | 31.39 | .21     | .034  | 2.2e-23 | .032    | 8.5e-31 | 26.81 | .23     |       |      |
| rs17068442 | 18  | 58040624 | G/A    | Prev               | 1    | .961 | .064   | 1.5e-7  | 1    | .965       | .050 | .23   | 1                | .988 | .001 | .98         | .99  | .974 | .390 | .062 | .059 | 6.5e-8    | 62.66 | .03  | .063            | 6.4e-14 | .061  | 1.8e-20 | 53.52 | .056    | 1.8e-20 | 53.52   | .056  | 1.8e-20 | 53.52 | .056 |
| rs12454712 | 18  | 60845884 | T/C    | Prev               | .64  | .629 | .016   | .012    | 1    | .638       | .025 | .13   | 1                | .523 | .018 | .27         | 1    | .757 | .070 | .017 | .57  | .540      | .024  | .79  | .014            | .0086   | 54.32 | .067    | .017  | 1.5e-5  | .016    | 4.4e-7  | 44.16 | .11     |       |      |
| rs17710386 | 18  | 63461201 | T/C    | Prev               | .86  | .664 | .011   | .04     | .86  | .668       | .008 | .65   | .82              | .651 | .002 | .93         | 1    | .286 | .041 | .18  | .77  | .563      | .059  | .42  | .008            | .009    | 1.99  | .4      | .012  | .00023  | .011    | 7.4e-5  | .00   | .47     |       |      |
| rs2396359  | 19  | 1819125  | T/C    | Prev               | .32  | .742 | .002   | .86     | .99  | .690       | .012 | .49   | .31              | .607 | .015 | .6          | .97  | .516 | .061 | .018 | .3   | .692      | .164  | .52  | .006            | .41     | 45.60 | .12     | .015  | .00021  | .013    | .00025  | 40.35 | .14     |       |      |
| rs11672550 | 19  | 1937193  | C/T    | Prev               | .44  | .477 | .009   | .21     | .92  | .540       | .017 | .27   | .38              | .645 | .023 | .4          | .91  | .808 | .011 | .77  | .42  | .537      | .025  | .8   | .006            | .37     | .00   | .58     | .021  | 3e-7    | .013    | .00014  | 40.35 | .14     |       |      |
| rs45465594 | 19  | 3813906  | C/A    | Prev               | .41  | .866 | .001   | .91     | 1    | .749       | .015 | .91   | .53              | .808 | .040 | .15         | 1    | .879 | .051 | .17  | .38  | .851      | .140  | .35  | .003            | .75     | 22.33 | .27     | .009  | .97     | .001    | .86     | 4.14  | .39     |       |      |
| rs45465594 | 19  | 3813906  | C/A    | Prev               | .43  | .986 | .000   | .1      | .86  | .995       | .093 | .18   | .45              | .998 | .274 | .32         | .59  | .993 | .039 | .84  | .37  | .988      | .140  | .35  | .003            | .75     | 22.33 | .27     | .009  | .97     | .001    | .86     | 4.14  | .39     |       |      |
| rs4542783  | 19  | 86242160 | T/C    | Prev               | .84  | .535 | .008   | .12     | .99  | .440       | .019 | .22   | .86              | .279 | .011 | .55         | .92  | .462 | .058 | .37  | .988 | .140      | .35   | .003 | .75             | .004    | .42   | 53.01   | .075  | .003    | .35     | .003    | .22   | 41.27   | .13   |      |
| rs18108738 | 19  | 18253539 | G/A    | Prev               | .81  | .476 | .016   | .0035   | 1    | .477       | .012 | .44   | .96              | .623 | .057 | .029        | .92  | .345 | .141 | .076 | .010 | .028      | 71.01 | .008 | .009            | .0026   | 63.92 | .017    | .010  | .0026   | .009    | .0059   | 66.96 | .009    |       |      |
| rs2072490  | 19  | 18257540 | G/A    | Prev               | .81  | .476 | .016   | .0035   | 1    | .477       | .012 | .44   | .96              | .623 | .057 | .029        | .92  | .345 | .141 | .076 | .010 | .028      | 71.01 | .008 | .009            | .0026   | 63.92 | .017    | .010  | .0026   | .009    | .0059   | 66.96 | .009    |       |      |
| rs11554159 | 19  | 18288954 | C/A    | Prev               | .78  | .760 | .012   | .055    | 1    | .779       | .009 | .63   | .79              | .913 | .009 | .78         | 1    | .764 | .021 | .48  | .69  | .835      | .026  | .8   | .010            | .084    | .00   | .81     | .008  | .061    | .009    | .011    | .00   | .88     |       |      |
| rs874628   | 19  | 18304700 | A/G    | Prev               | .79  | .753 | .012   | .048    | 1    | .768       | .002 | .77   | .76              | .907 | .001 | .97         | 1    | .793 | .034 | .28  | .7   | .824      | .025  | .8   | .010            | .085    | .00   | .69     | .007  | .096    | .008    | .018    | .00   | .79     |       |      |
| rs12608504 | 19  | 18389135 | A/G    | Prev               | .58  | .343 | .013   | .051    | .99  | .332       | .008 | .61   | .69              | .199 | .031 | .19         | .99  | .368 | .038 | .15  | .47  | .331      | .115  | .24  | .015            | .0098   | .00   | .65     | .002  | .66     | .005    | .097    | 24.44 | .25     |       |      |
| rs17724992 | 19  | 18454825 | C/A    | Prev               | .51  | .707 | .003   | .69     | .98  | .661       | .020 | .23   | .84              | .554 | .020 | .26         | .96  | .866 | .001 | .99  | .5   | .676      | .120  | .23  | .008            | .66     | 2.28  | .39     | .017  | 3       |         |         |       |         |       |      |

| SNP         | Chr | Pos       | Allele | non-Hispanic white |      |      | Latino |        |      | East Asian |        |        | African American |      |        | South Asian |      |      | GERA   |      |       | GIANT EUR |        |       | GERA+GIANT Meta |         |       |         |       |        |       |         |       |        |
|-------------|-----|-----------|--------|--------------------|------|------|--------|--------|------|------------|--------|--------|------------------|------|--------|-------------|------|------|--------|------|-------|-----------|--------|-------|-----------------|---------|-------|---------|-------|--------|-------|---------|-------|--------|
|             |     |           |        | Info               | Freq | Eff  | P      | Info   | Freq | Eff        | P      | Info   | Freq             | Eff  | P      | Info        | Freq | Eff  | P      | Eff  | P     | Eff       | P      | Eff   | P               | Het     | P     |         |       |        |       |         |       |        |
| rs16978956  | 20  | 18288165  | A/G    | Prev               | .98  | .775 | -0.017 | .0035  | .98  | .749       | -0.017 | .35    | .97              | .849 | .006   | .8          | .96  | .443 | .010   | .71  | -.015 | .045      | .00    | .71   | -.010           | .017    | -.012 | .00026  | .00   | .76    |       |         |       |        |
| rs72749653  | 20  | 182909730 | A/G    | Prev               | 1    | .807 | -0.010 | .0095  | .98  | .787       | -0.023 | .23    | .97              | .854 | .008   | .74         | .97  | .821 | .026   | .33  | -.009 | .128      | .00    | .53   | -.013           | .0077   | -.011 | .0021   | .00   | .68    |       |         |       |        |
| rs404099160 | 20  | 182909730 | C/T    | Prev               | 1    | .922 | -0.027 | .0031  | 1    | .881       | .023   | .35    | 1                | .881 | .041   | .25         | 1    | .801 | .041   | .25  | -.017 | .028      | .5877  | .046  | -.016           | .02     | -.016 | .0014   | .48   | .58    |       |         |       |        |
| rs22282873  | 20  | 182909730 | G/A    | Prev               | 1    | .922 | -0.025 | .0044  | 1    | .883       | .022   | .37    | 1                | .883 | .039   | .27         | 1    | .801 | .039   | .27  | -.016 | .038      | .5829  | .048  | -.023           | .0048   | -.019 | .00058  | 48.59 | .076   |       |         |       |        |
| rs2069126   | 20  | 19740957  | A/G    | Prev               | .98  | .352 | .004   | .4     | .98  | .362       | .024   | .14    | .98              | .309 | .022   | .2          | .97  | .385 | .024   | .35  | .006  | .18       | .00    | .44   | -.003           | .98     | .003  | .39     | .00   | .45    |       |         |       |        |
| rs20705559  | 20  | 25187213  | G/A    | Prev               | 1    | .677 | -0.006 | .26    | 1    | .748       | .002   | .91    | .98              | .432 | -0.027 | .096        | 1    | .839 | -0.001 | .1   | -.007 | .12       | .00    | .55   | -.010           | .015    | -.009 | .00045  | .00   | .67    |       |         |       |        |
| rs6050546   | 20  | 25195509  | A/G    | Prev               | .88  | .034 | -0.059 | 2.5e-5 | .99  | .009       | -0.02  | .2     | .73              | .001 | -0.189 | .46         | .85  | .011 | -0.181 | .17  | -.72  | .013      | -0.483 | .14   | -.027           | .0036   | -.036 | 2.7e-6  | .51   | .12    |       |         |       |        |
| rs6085552   | 20  | 33226491  | A/G    | Prev               | 1    | .623 | -0.004 | .44    | 1    | .457       | -0.008 | .62    | .99              | .594 | .028   | .077        | 1    | .628 | .007   | .78  | -.001 | .77       | .80    | .4    | -.001           | .72     | .000  | .9      | .00   | .52    |       |         |       |        |
| rs6085735   | 20  | 33745676  | C/T    | Prev               | 1    | .773 | -0.009 | .11    | 1    | .809       | -0.027 | .16    | .99              | .696 | .044   | .11         | .99  | .783 | .086   | .26  | -.009 | .093      | .2939  | .23   | -.005           | .15     | -.006 | .032    | .16   | .31    |       |         |       |        |
| rs1406948   | 20  | 33905169  | G/A    | Prev               | 1    | .616 | .000   | .99    | 1    | .666       | .014   | .38    | 1                | .702 | .040   | .021        | 1    | .460 | .003   | .91  | 1     | .464      | .049   | .16   | -.002           | .51     | -.001 | .7      | .29   | .11    |       |         |       |        |
| rs49111492  | 20  | 33957199  | G/A    | Prev               | 1    | .386 | .001   | .78    | 1    | .340       | .013   | .42    | 1                | .304 | .041   | .017        | 1    | .612 | .015   | .57  | 1     | .534      | .049   | .12   | -.002           | .55     | .001  | .69     | .34   | .18    |       |         |       |        |
| rs4911180   | 20  | 33972948  | G/A    | Prev               | 1    | .383 | .002   | .66    | 1    | .341       | .010   | .54    | 1                | .303 | .042   | .013        | 1    | .613 | .008   | .75  | 1     | .536      | .054   | .39   | -.000           | .94     | .001  | .64     | .34   | .18    |       |         |       |        |
| rs2242433   | 20  | 34023962  | G/A    | Prev               | .99  | .629 | -0.001 | .82    | .99  | .653       | -0.011 | .49    | .99              | .704 | .047   | .0071       | .99  | .714 | .012   | .71  | .96   | .492      | -0.018 | .78   | -.002           | .74     | -.000 | .94     | .34   | .18    |       |         |       |        |
| rs143384    | 20  | 34025756  | A/G    | Prev               | 1    | .577 | -0.001 | .84    | 1    | .618       | -0.018 | .26    | 1                | .694 | .044   | .01         | 1    | .158 | .035   | .31  | 1     | .440      | .063   | .32   | -.001           | .82     | -.000 | .97     | .49   | .62    | .077  |         |       |        |
| rs6013029   | 20  | 36399580  | G/T    | Prev               | 1    | .949 | -0.026 | .014   | 1    | .941       | -0.018 | .58    | .97              | .981 | .058   | .33         | .99  | .786 | -0.004 | .89  | 1     | .972      | .199   | .3    | -.018           | .866    | -.019 | .47     | .39   | .46    | .14   |         |       |        |
| rs6012059   | 20  | 45503214  | A/G    | Prev               | .99  | .391 | -0.013 | .01    | .98  | .376       | -0.043 | .0084  | .98              | .351 | -0.031 | .065        | .98  | .226 | -0.059 | .044 | -.98  | -.497     | -.078  | .24   | -.011           | .004    | -.014 | 1.9e-6  | .36   | .52    | .16   |         |       |        |
| rs1984707   | 20  | 45513435  | A/G    | Prev               | .99  | .439 | -0.012 | .012   | .99  | .430       | -0.031 | .052   | .99              | .361 | -0.021 | .19         | .99  | .422 | -0.051 | .56  | -.99  | .510      | .00    | .81   | -.012           | .0016   | -.013 | 5.6e-6  | .00   | .88    | .25   |         |       |        |
| rs6018158   | 20  | 45538434  | T/C    | Prev               | .98  | .403 | -0.014 | .0056  | .98  | .510       | -0.030 | .057   | .96              | .433 | -0.008 | .62         | .96  | .346 | -0.038 | .16  | -.9   | .488      | -.071  | .3    | -.015           | .0038   | -.013 | 8.2e-6  | .00   | .68    | .88   |         |       |        |
| rs6090583   | 20  | 45558831  | A/G    | Prev               | .94  | .479 | -0.015 | .0027  | .91  | .576       | -0.000 | .98    | .87              | .811 | .021   | .49         | .86  | .561 | -0.114 | .096 | -.012 | .0092     | .3549  | .18   | -.008           | .0077   | -.009 | .00023  | 24.34 | .25    | .087  |         |       |        |
| rs6124901   | 20  | 45569796  | G/A    | Prev               | 1    | .719 | .007   | .17    | .95  | .645       | .020   | .23    | 1                | .715 | .034   | .053        | .9   | .908 | .061   | .18  | 1     | .717      | .074   | .31   | -.011           | .019    | -.008 | .006    | 5.89  | .38    | .38   |         |       |        |
| rs6012558   | 20  | 47531286  | G/A    | Prev               | .97  | .578 | .007   | .18    | .97  | .663       | -0.001 | .93    | 1                | .845 | .027   | .21         | .84  | .536 | .050   | .072 | .89   | .755      | -.031  | .7    | -.008           | .08     | -.008 | .0022   | .00   | .59    | .59   |         |       |        |
| rs16996700  | 20  | 50981945  | T/C    | Prev               | .98  | .726 | .027   | .5e-7  | .98  | .707       | -0.018 | .29    | .99              | .729 | -0.011 | .52         | .98  | .697 | .022   | .42  | -.96  | .821      | -.033  | .7    | -.023           | 1.8e-6  | 17.00 | .31     | .018  | 1.7e-7 | .020  | 1.5e-12 | 10.44 | .35    |
| rs6091540   | 20  | 51087862  | C/T    | Prev               | 1    | .717 | .031   | .6e-9  | .99  | .682       | .062   | .00016 | 1                | .707 | .007   | .71         | .99  | .773 | -0.011 | .71  | 1     | .690      | .041   | .57   | .031            | 1.4e-10 | 46.47 | .11     | .019  | 8e-8   | .023  | 4.4e-16 | 56.40 | .043   |
| rs13041126  | 20  | 51092996  | T/C    | Prev               | 1    | .717 | .031   | .56e-9 | .99  | .684       | .063   | .00012 | 1                | .708 | .008   | .64         | 1    | .792 | -0.004 | .91  | 1     | .690      | .041   | .57   | .031            | 7.1e-11 | 41.03 | .15     | .020  | 1.5e-6 | .025  | 2.4e-15 | 48.68 | .083   |
| rs11907932  | 20  | 51148656  | A/G    | KP                 | .97  | .699 | .032   | .18e-9 | .95  | .625       | .057   | .00035 | .97              | .664 | .017   | .33         | .96  | .773 | -0.006 | .85  | .97   | .644      | -.023  | .74   | .032            | 2.4e-11 | 26.43 | .25     | .019  | 8.3e-7 | .024  | 8.5e-16 | 47.94 | .087   |
| rs2247627   | 20  | 54145086  | G/A    | Prev               | 1    | .659 | -0.018 | .00046 | .99  | .653       | -0.000 | .99    | .99              | .572 | -0.042 | .0097       | .93  | .374 | -0.030 | .25  | .98   | .497      | .003   | .96   | -.019           | 4.6e-5  | .00   | -.45    | -.008 | .051   | -.013 | 2.9e-5  | 24.68 | .25    |
| rs2243930   | 20  | 54147462  | G/A    | Prev               | 1    | .781 | -0.022 | .00013 | .99  | .789       | -0.001 | .97    | .99              | .616 | -0.036 | .03         | .98  | .844 | -0.012 | .73  | .99   | .709      | -0.119 | .092  | -.022           | 1.7e-5  | .00   | -.42    | -.013 | .00042 | -.017 | 6.3e-8  | 12.91 | .33    |
| rs11908421  | 20  | 54379667  | T/C    | Prev               | .98  | .802 | .009   | .16    | .99  | .835       | -0.029 | .15    | .97              | .867 | -0.009 | .71         | .97  | .559 | -0.001 | .95  | .96   | .796      | .057   | .48   | -.001           | .9      | -.001 | .0024   | 18.13 | .3     | .3    | .3      |       |        |
| rs6025590   | 20  | 56070505  | A/G    | Prev               | 1    | .381 | .002   | .68    | .99  | .357       | -0.035 | .031   | 1                | .351 | .048   | .0035       | 1    | .173 | -0.077 | .019 | 1     | .260      | .209   | .0041 | .007            | .1      | .83   | 61.6e-5 | -.001 | .9     | .003  | .34     | 80.88 | 8.4e-5 |
| rs2057291   | 20  | 57472043  | A/G    | Prev               | 1    | .341 | .008   | .12    | 1    | .305       | -0.003 | .86    | .96              | .258 | .006   | .74         | 1    | .232 | -0.074 | .013 | 1     | .254      | .001   | .99   | -.005           | .24     | 45.19 | .12     | -.001 | .86    | -.002 | .51     | 39.59 | .14    |
| rs6080584   | 20  | 60564086  | G/C    | Prev               | .98  | .332 | -0.000 | .97    | .99  | .393       | -0.020 | .21    | .98              | .347 | .002   | .92         | .95  | .469 | .036   | .16  | .98   | .424      | .086   | .19   | .003            | .6      | 16.63 | .31     | .006  | .11    | .005  | .095    | .25   | .41    |
| rs2828362   | 21  | 17483133  | A/T    | Prev               | .94  | .672 | .003   | .58    | .93  | .762       | -0.016 | .4     | .97              | .911 | .011   | .7          | .96  | .608 | .017   | .5   | .94   | .726      | .038   | .62   | .003            | .6      | 10.00 | .81     | .006  | .13    | .000  | .86     | .86   |        |
| rs11088559  | 21  | 22689344  | G/A    | Prev               | .96  | .984 | -0.021 | .26    | 1    | .953       | -0.017 | .65    | 1                | .821 | .002   | .92         | .99  | .916 | .019   | .67  | .92   | .957      | .333   | .044  | -.003           | .81     | 29.27 | .23     | .019  | .11    | .009  | .32     | 31.12 | .2     |
| rs2836764   | 21  | 40291740  | T/C    | Prev               | 1    | .371 | -0.019 | .00015 | 1    | .529       | -0.016 | .29    | 1                | .632 | -0.022 | .18         | 1    | .618 | .001   | .97  | 1     | .719      | .048   | .5    | -.018           | 5.6e-5  | .00   | .83     | -.016 | 4.2e-7 | -.017 | 7.4e-11 | .00   | .9     |
| rs2836768   | 21  | 40311493  | G/T    | Prev               | .99  | .605 | .018   | .00035 | .98  | .625       | .030   | .064   | .99              | .411 | .028   | .08         | .97  | .696 | .019   | .48  | .98   | .302      | .028   | .68   | .019            | 1.3e-5  | .00   | .93     | .018  | 2.8e-6 | .018  | 1.6e-10 | .00   | .97    |
| rs9893113   | 21  | 40315316  | G/T    | Prev               | .99  | .589 | .018   | .00019 | .99  | .614       | .029   | .074   | .99              | .408 | .025   | .12         | 1    | .697 | .015   | .59  | .97   | .300      | .029   | .68   | .019            | 1e-5    | .00   | .97     | -.017 | 8.7e-6 | .018  | 4.2e-10 | .00   | .98    |
| rs4279413   | 21  | 46570896  | A/C    | Prev               | .95  | .452 | -0.008 | .12    | .96  | .531       | -0.018 | .24    | .95              | .498 | .010   | .36         | .94  | .400 | .006   | .83  | .92   | .437      | -0.128 | .06   | -.007           | .095    | 19.19 | .29     | -.018 | 3.9e-7 | -.014 | 7.3e-7  | 41.13 | .13    |
| rs9977276   | 21  | 47436327  | T/C    | Prev               | .95  | .216 | .003   | .62    | .99  | .159       | .021   | .32    | .89              | .087 | .038   | .21         | .97  | .220 | .032   | .32  | .9    | .118      | -.007  | .95   | .004            | .44     | .00   | .52     | .005  | .15    | .005  | .1      | .00   | .68    |
| rs17500093  | 22  | 17990258  | C/G    | Prev               | .54  | .958 | -0.012 | .45    | .67  | .935       | -0.054 | .16    | .61              | .882 | .027   | .39         | .51  | .974 | .032   | .84  | .55   | .949      | .177   | .37   | -.009           | .48     | .00   | .45     | -.004 | .76    | -.007 | .48     | .00   | .50    |
| rs2291259   | 22  | 29430477  | A/G    | Prev               | .97  | .580 | -0.003 | .51    | .98  | .598       | -0.033 | .15    | .98              | .543 | -0.003 | .85         | .96  | .753 | .005   | .037 | .96   | .518      | .050   | .46   | -.003           | .48     | 42.07 | .14     | -.004 | .22    | -.004 | .16     | 27.75 | .23    |
| rs2191249   | 22  | 29450923  | A/G    | Prev               | 1    | .580 | -0.005 | .25    | 1    | .602       | -0.032 | .011   | 1                | .583 | .030   | .35         | 1    | .813 | .030   | .35  | 1     | .511      | .039   | .55   | -.006           | .4      | 12.02 | .34     | -.002 | .59    | -.003 | .19     | 6.02  | .38    |
| rs4823006   | 22  | 29451671  | A/G    | Prev               | 1    | .349 | -0.005 | .32    | 1    | .550       | -0.008 | .62    | 1                | .437 | .004   | .78         | 1    | .690 | .002   | .93  | 1     | .414      | .075   | .26   | -.004           | .38     | .00   | .77     | -.002 | .32    | .00   | .85     | .85   |        |
| rs2092029   | 22  | 35652241  | C/T    | Prev               | .99  | .318 | -0.008 | .15    | .99  | .379       | -0.023 | .15    | 1                | .429 | -0.019 | .24         | .98  | .702 | -0.019 | .52  | .99   | .416      | -0.172 | .009  | -.011           | .019    | 45.43 | .12     | -.003 | .24    | -.007 | .015    | 40.10 | .14    |
| rs4820408   | 22  | 40049445  | T/G    | Prev               | .99  | .412 | -0.018 | .00023 | .99  | .368       | .001   | .95    | .98              | .567 | .039   | .0          |      |      |        |      |       |           |        |       |                 |         |       |         |       |        |       |         |       |        |

**Table S5. SNPs GWAS significant in the meta-analysis of GERA and GIANT.** Chr, chromosome; Pos, Position; Allele, coded effect allele/other allele; Info, Impute2 imputation  $r^2$ quality; Frq, frequency of effect allele; Eff, effect size.

| SNP        | Chr | Pos       | Allele | Group                   | Info | Frq  | Eff   | P       | I <sup>2</sup> | hetp   |
|------------|-----|-----------|--------|-------------------------|------|------|-------|---------|----------------|--------|
| rs1074657  | 1   | 243746634 | T/C    | GERA Non-Hispanic white | .96  | .688 | -.021 | 6.9e-5  |                |        |
|            |     |           |        | GERA Latino             | .95  | .610 | -.019 | .24     |                |        |
|            |     |           |        | GERA East Asian         | .97  | .502 | -.026 | .11     |                |        |
|            |     |           |        | GERA African American   | .98  | .244 | -.022 | .44     |                |        |
|            |     |           |        | GERA South Asian        | .97  | .530 | -.035 | .59     |                |        |
|            |     |           |        | GERA Meta               |      |      | -.021 | 5.8e-6  | .00            | 1      |
|            |     |           |        | GIANT                   | .97  | .312 | -.014 | .00018  |                |        |
|            |     |           |        | GERA+GIANT              |      |      | -.017 | 7.7e-9  | .00            | .92    |
|            |     |           |        | UKB Non-Hispanic white  | .99  | .683 | -.011 | 8.6e-7  |                |        |
|            |     |           |        | UKB Mixed/Other         | 1    | .534 | -.000 | .99     |                |        |
|            |     |           |        | UKB South Asian         | 1    | .496 | -.025 | .096    |                |        |
|            |     |           |        | UKB East Asian          | .98  | .495 | -.016 | .63     |                |        |
|            |     |           |        | UKB African American    | 1    | .200 | -.013 | .54     |                |        |
|            |     |           |        | GERA+GIANT+UKB Meta     |      |      | -.042 | .00017  | 77.88          | .0004  |
| rs1396141  | 2   | 41673745  | T/C    | GERA Non-Hispanic white | .98  | .630 | .019  | .00011  |                |        |
|            |     |           |        | GERA Latino             | .98  | .745 | .011  | .52     |                |        |
|            |     |           |        | GERA East Asian         | .99  | .941 | .055  | .098    |                |        |
|            |     |           |        | GERA African American   | .99  | .839 | .080  | .02     |                |        |
|            |     |           |        | GERA South Asian        | .96  | .729 | -.005 | .95     |                |        |
|            |     |           |        | GERA Meta               |      |      | .020  | 1.3e-5  | 11.68          | .34    |
|            |     |           |        | GIANT                   | 1    | .600 | .014  | .00015  |                |        |
|            |     |           |        | GERA+GIANT              |      |      | .017  | 1.2e-8  | 9.43           | .36    |
|            |     |           |        | UKB Non-Hispanic white  | .99  | .627 | .010  | 7.3e-6  |                |        |
|            |     |           |        | UKB Mixed/Other         | 1    | .733 | -.002 | .9      |                |        |
|            |     |           |        | UKB South Asian         | 1    | .724 | .020  | .22     |                |        |
|            |     |           |        | UKB East Asian          | 1    | .949 | -.076 | .32     |                |        |
|            |     |           |        | UKB African American    | .97  | .855 | .041  | .075    |                |        |
|            |     |           |        | GERA+GIANT+UKB Meta     |      |      | -.014 | 6.7e-16 | 33.41          | .13    |
| rs7580766  | 2   | 42939351  | G/A    | GERA Non-Hispanic white | 1    | .568 | .017  | .00033  |                |        |
|            |     |           |        | GERA Latino             | 1    | .644 | .035  | .03     |                |        |
|            |     |           |        | GERA East Asian         | 1    | .509 | -.004 | .79     |                |        |
|            |     |           |        | GERA African American   | .99  | .788 | .036  | .25     |                |        |
|            |     |           |        | GERA South Asian        | .99  | .796 | .084  | .27     |                |        |
|            |     |           |        | GERA Meta               |      |      | .017  | 6.2e-5  | 5.22           | .38    |
|            |     |           |        | GIANT                   | 1    | .650 | .014  | .00015  |                |        |
|            |     |           |        | GERA+GIANT              |      |      | .015  | 4.3e-8  | .00            | .47    |
|            |     |           |        | UKB Non-Hispanic white  | 1    | .557 | .009  | 9e-5    |                |        |
|            |     |           |        | UKB Mixed/Other         | 1    | .676 | -.002 | .9      |                |        |
|            |     |           |        | UKB South Asian         | 1    | .776 | .012  | .49     |                |        |
|            |     |           |        | UKB East Asian          | .97  | .521 | -.036 | .29     |                |        |
|            |     |           |        | UKB African American    | .98  | .838 | -.036 | .099    |                |        |
|            |     |           |        | GERA+GIANT+UKB Meta     |      |      | .008  | 6.9e-6  | 67.08          | .00074 |
| rs6710871  | 2   | 143960593 | A/G    | GERA Non-Hispanic white | 1    | .142 | .021  | .0019   |                |        |
|            |     |           |        | GERA Latino             | 1    | .173 | .039  | .055    |                |        |
|            |     |           |        | GERA East Asian         | 1    | .128 | .012  | .63     |                |        |
|            |     |           |        | GERA African American   | .99  | .216 | .096  | .0016   |                |        |
|            |     |           |        | GERA South Asian        | 1    | .213 | -.035 | .65     |                |        |
|            |     |           |        | GERA Meta               |      |      | .025  | 4.9e-5  | 44.21          | .13    |
|            |     |           |        | GIANT                   | 1    | .138 | .022  | 1e-5    |                |        |
|            |     |           |        | GERA+GIANT              |      |      | .023  | 2.2e-9  | 31.76          | .2     |
|            |     |           |        | UKB Non-Hispanic white  | 1    | .140 | .019  | 3.7e-10 |                |        |
|            |     |           |        | UKB Mixed/Other         | 1    | .184 | .043  | .042    |                |        |
|            |     |           |        | UKB South Asian         | 1    | .202 | .020  | .28     |                |        |
|            |     |           |        | UKB East Asian          | .97  | .109 | .105  | .051    |                |        |
|            |     |           |        | UKB African American    | 1    | .230 | .015  | .43     |                |        |
|            |     |           |        | GERA+GIANT+UKB Meta     |      |      | -.015 | 7.8e-9  | 44.82          | .053   |
| rs4857968  | 3   | 20714580  | G/A    | GERA Non-Hispanic white | 1    | .277 | -.026 | 1.3e-6  |                |        |
|            |     |           |        | GERA Latino             | .99  | .259 | -.019 | .3      |                |        |
|            |     |           |        | GERA East Asian         | 1    | .039 | -.042 | .3      |                |        |
|            |     |           |        | GERA African American   | .98  | .067 | .043  | .39     |                |        |
|            |     |           |        | GERA South Asian        | 1    | .187 | -.047 | .59     |                |        |
|            |     |           |        | GERA Meta               |      |      | -.025 | 8.1e-7  | .00            | .7     |
|            |     |           |        | GIANT                   | 1    | .350 | -.014 | 6.3e-5  |                |        |
|            |     |           |        | GERA+GIANT              |      |      | -.018 | 1.1e-9  | 5.74           | .38    |
|            |     |           |        | UKB Non-Hispanic white  | .99  | .281 | -.013 | 3.9e-8  |                |        |
|            |     |           |        | UKB Mixed/Other         | 1    | .177 | -.028 | .2      |                |        |
|            |     |           |        | UKB South Asian         | .96  | .188 | -.015 | .45     |                |        |
|            |     |           |        | UKB East Asian          | .99  | .030 | -.137 | .17     |                |        |
|            |     |           |        | UKB African American    | 1    | .042 | -.029 | .5      |                |        |
|            |     |           |        | GERA+GIANT+UKB Meta     |      |      | -.014 | 8.1e-15 | 55.25          | .013   |
| rs1436351  | 3   | 104617973 | T/G    | GERA Non-Hispanic white | 1    | .752 | .013  | .017    |                |        |
|            |     |           |        | GERA Latino             | .99  | .666 | .025  | .12     |                |        |
|            |     |           |        | GERA East Asian         | 1    | .717 | .036  | .038    |                |        |
|            |     |           |        | GERA African American   | 1    | .547 | .059  | .019    |                |        |
|            |     |           |        | GERA South Asian        | 1    | .727 | -.015 | .84     |                |        |
|            |     |           |        | GERA Meta               |      |      | .018  | .00031  | 18.75          | .3     |
|            |     |           |        | GIANT                   | 1    | .725 | .016  | 8.3e-6  |                |        |
|            |     |           |        | GERA+GIANT              |      |      | .016  | 1.4e-8  | .25            | .41    |
|            |     |           |        | UKB Non-Hispanic white  | 1    | .747 | .016  | 7.2e-11 |                |        |
|            |     |           |        | UKB Mixed/Other         | 1    | .697 | -.007 | .7      |                |        |
|            |     |           |        | UKB South Asian         | .99  | .746 | -.005 | .79     |                |        |
|            |     |           |        | UKB East Asian          | .99  | .714 | .020  | .59     |                |        |
|            |     |           |        | UKB African American    | .97  | .525 | .016  | .32     |                |        |
|            |     |           |        | GERA+GIANT+UKB Meta     |      |      | .013  | .0076   | 81.98          | 2.1e-6 |
| rs4833079  | 4   | 38654681  | T/C    | GERA Non-Hispanic white | .98  | .391 | -.024 | 1.1e-6  |                |        |
|            |     |           |        | GERA Latino             | .96  | .252 | .001  | .96     |                |        |
|            |     |           |        | GERA East Asian         | .95  | .042 | -.018 | .64     |                |        |
|            |     |           |        | GERA African American   | .95  | .163 | -.020 | .57     |                |        |
|            |     |           |        | GERA South Asian        | .95  | .122 | -.159 | .11     |                |        |
|            |     |           |        | GERA Meta               |      |      | -.022 | 1.5e-6  | .00            | .44    |
|            |     |           |        | GIANT                   | 1    | .367 | -.014 | 1.2e-5  |                |        |
|            |     |           |        | GERA+GIANT              |      |      | -.016 | 2.1e-10 | 18.68          | .29    |
|            |     |           |        | UKB Non-Hispanic white  | 1    | .422 | -.011 | 2.2e-7  |                |        |
|            |     |           |        | UKB Mixed/Other         | 1    | .231 | -.025 | .23     |                |        |
|            |     |           |        | UKB South Asian         | .98  | .136 | -.016 | .47     |                |        |
|            |     |           |        | UKB East Asian          | .92  | .026 | -.054 | .62     |                |        |
|            |     |           |        | UKB African American    | .95  | .146 | .020  | .4      |                |        |
|            |     |           |        | GERA+GIANT+UKB Meta     |      |      | .036  | 5.6e-20 | 52.60          | .025   |
| rs10019997 | 4   | 137048599 | T/C    | GERA Non-Hispanic white | 1    | .415 | .021  | 2.1e-5  |                |        |

| SNP        | Chr | Pos       | Allele Group | Info                    | Freq | Eff   | P      | I <sup>2</sup> | hetp |
|------------|-----|-----------|--------------|-------------------------|------|-------|--------|----------------|------|
| rs10063334 | 5   | 112760874 | C/T          | GERA Latino             | 1    | .534  | .027   | .082           |      |
|            |     |           |              | GERA East Asian         | 1    | .721  | .007   | .69            |      |
|            |     |           |              | GERA African American   | .99  | .521  | .010   | .69            |      |
|            |     |           |              | GERA South Asian        | 1    | .523  | -.029  | .66            |      |
|            |     |           |              | GERA Meta               |      | .020  | 7e-6   | .00            | .83  |
|            |     |           |              | GIANT                   | 1    | .392  | .012   | .0001          |      |
|            |     |           |              | GERA+GIANT              |      | .015  | 7.5e-9 | .00            | .62  |
|            |     |           |              | UKB Non-Hispanic white  | 1    | .412  | .016   | 3e-13          |      |
|            |     |           |              | UKB Mixed/Other         | 1    | .498  | .009   | .6             |      |
|            |     |           |              | UKB South Asian         | 1    | .522  | .012   | .42            |      |
|            |     |           |              | UKB East Asian          | .99  | .767  | .026   | .51            |      |
|            |     |           |              | UKB African American    | .96  | .539  | .018   | .26            |      |
|            |     |           |              | GERA+GIANT+UKB Meta     |      |       |        |                |      |
|            |     |           |              | GERA Non-Hispanic white | 1    | .182  | .020   | .0011          |      |
|            |     |           |              | GERA Latino             | 1    | .341  | .045   | .0045          |      |
|            |     |           |              | GERA East Asian         | 1    | .207  | .049   | .012           |      |
|            |     |           |              | GERA African American   | .99  | .495  | .025   | .32            |      |
|            |     |           |              | GERA South Asian        | 1    | .197  | .063   | .46            |      |
|            |     |           |              | GERA Meta               |      | .026  | 1.9e-6 | .00            | .41  |
|            |     |           |              | GIANT                   | 1    | .050  | .028   | .00024         |      |
|            |     |           |              | GERA+GIANT              |      | .026  | 1.9e-9 | .00            | .54  |
| rs7730898  | 5   | 170459675 | A/G          | UKB Non-Hispanic white  | 1    | .177  | .009   | .0022          |      |
|            |     |           |              | UKB Mixed/Other         | 1    | .267  | .022   | .26            |      |
|            |     |           |              | UKB South Asian         | 1    | .169  | .023   | .24            |      |
|            |     |           |              | UKB East Asian          | .99  | .197  | .006   | .9             |      |
|            |     |           |              | UKB African American    | 1    | .544  | -.027  | .094           |      |
|            |     |           |              | GERA+GIANT+UKB Meta     |      |       |        |                |      |
|            |     |           |              | GERA Non-Hispanic white | .97  | .724  | .028   | 3.4e-7         |      |
|            |     |           |              | GERA Latino             | .97  | .735  | -.008  | .66            |      |
|            |     |           |              | GERA East Asian         | .99  | .884  | -.005  | .84            |      |
|            |     |           |              | GERA African American   | .96  | .784  | .031   | .32            |      |
|            |     |           |              | GERA South Asian        | .93  | .887  | .219   | .036           |      |
|            |     |           |              | GERA Meta               |      | .024  | 1.5e-6 | 52.82          | .076 |
|            |     |           |              | GIANT                   | 1    | .725  | .013   | .00016         |      |
|            |     |           |              | GERA+GIANT              |      | .016  | 5.1e-9 | 57.94          | .036 |
|            |     |           |              | UKB Non-Hispanic white  | 1    | .729  | .018   | 4.2e-14        |      |
|            |     |           |              | UKB Mixed/Other         | 1    | .798  | .008   | .7             |      |
|            |     |           |              | UKB South Asian         | 1    | .888  | .014   | .54            |      |
|            |     |           |              | UKB East Asian          | .98  | .901  | .040   | .48            |      |
|            |     |           |              | UKB African American    | .98  | .780  | .005   | .79            |      |
|            |     |           |              | GERA+GIANT+UKB Meta     |      |       |        |                |      |
| rs947612   | 6   | 73738661  | G/A          | GERA Non-Hispanic white | .98  | .747  | -.031  | 2.6e-8         |      |
|            |     |           |              | GERA Latino             | .96  | .630  | -.004  | .83            |      |
|            |     |           |              | GERA East Asian         | .98  | .223  | -.014  | .45            |      |
|            |     |           |              | GERA African American   | .96  | .295  | -.015  | .59            |      |
|            |     |           |              | GERA South Asian        | .96  | .639  | -.065  | .36            |      |
|            |     |           |              | GERA Meta               |      | -.027 | 6.3e-8 | .00            | .49  |
|            |     |           |              | GIANT                   | 1    | .758  | -.012  | .0053          |      |
|            |     |           |              | GERA+GIANT              |      | -.018 | 1.6e-8 | 41.25          | .13  |
|            |     |           |              | UKB Non-Hispanic white  | 1    | .752  | -.013  | 4.6e-7         |      |
|            |     |           |              | UKB Mixed/Other         | 1    | .575  | -.020  | .27            |      |
|            |     |           |              | UKB South Asian         | 1    | .679  | -.011  | .46            |      |
|            |     |           |              | UKB East Asian          | 1    | .203  | -.035  | .39            |      |
|            |     |           |              | UKB African American    | 1    | .238  | .038   | .053           |      |
|            |     |           |              | GERA+GIANT+UKB Meta     |      |       |        |                |      |
|            |     |           |              | GERA Non-Hispanic white | 1    | .396  | -.017  | .00041         |      |
|            |     |           |              | GERA Latino             | 1    | .311  | -.026  | .12            |      |
|            |     |           |              | GERA East Asian         | 1    | .406  | -.007  | .67            |      |
|            |     |           |              | GERA African American   | 1    | .228  | -.044  | .15            |      |
|            |     |           |              | GERA South Asian        | 1    | .224  | .010   | .89            |      |
|            |     |           |              | GERA Meta               |      | -.018 | 7.7e-5 | .00            | .81  |
| rs901630   | 6   | 98539519  | C/T          | GIANT                   | 1    | .483  | -.013  | 6e-5           |      |
|            |     |           |              | GERA+GIANT              |      | -.014 | 2.5e-8 | .00            | .79  |
|            |     |           |              | UKB Non-Hispanic white  | 1    | .394  | -.019  | 8.9e-19        |      |
|            |     |           |              | UKB Mixed/Other         | 1    | .314  | -.022  | .22            |      |
|            |     |           |              | UKB South Asian         | 1    | .229  | .005   | .78            |      |
|            |     |           |              | UKB East Asian          | 1    | .414  | -.066  | .048           |      |
|            |     |           |              | UKB African American    | 1    | .208  | -.016  | .41            |      |
|            |     |           |              | GERA+GIANT+UKB Meta     |      |       |        |                |      |
|            |     |           |              | GERA Non-Hispanic white | 1    | .771  | -.014  | .013           |      |
|            |     |           |              | GERA Latino             | 1    | .847  | -.022  | .3             |      |
|            |     |           |              | GERA East Asian         | 1    | .933  | -.029  | .36            |      |
|            |     |           |              | GERA African American   | 1    | .945  | -.046  | .4             |      |
|            |     |           |              | GERA South Asian        | 1    | .872  | .103   | .27            |      |
|            |     |           |              | GERA Meta               |      | -.015 | .0052  | .00            | .7   |
|            |     |           |              | GIANT                   | 1    | .758  | -.017  | 2.5e-6         |      |
|            |     |           |              | GERA+GIANT              |      | -.016 | 4.3e-8 | .00            | .8   |
|            |     |           |              | UKB Non-Hispanic white  | 1    | .760  | -.011  | 1.5e-5         |      |
|            |     |           |              | UKB Mixed/Other         | 1    | .855  | -.036  | .13            |      |
|            |     |           |              | UKB South Asian         | 1    | .870  | -.006  | .79            |      |
|            |     |           |              | UKB East Asian          | 1    | .934  | .069   | .3             |      |
| rs6569648  | 6   | 130349119 | C/T          | UKB African American    | 1    | .965  | .002   | .97            |      |
|            |     |           |              | GERA+GIANT+UKB Meta     |      |       |        |                |      |
|            |     |           |              | GERA Non-Hispanic white | 1    | .418  | -.019  | .0001          |      |
|            |     |           |              | GERA Latino             | .99  | .343  | -.010  | .53            |      |
|            |     |           |              | GERA East Asian         | .95  | .705  | .004   | .83            |      |
|            |     |           |              | GERA African American   | .98  | .117  | -.005  | .9             |      |
|            |     |           |              | GERA South Asian        | 1    | .480  | -.031  | .63            |      |
|            |     |           |              | GERA Meta               |      | -.017 | .00019 | .00            | .76  |
|            |     |           |              | GIANT                   | 1    | .375  | -.015  | 1.5e-6         |      |
|            |     |           |              | GERA+GIANT              |      | -.016 | 1e-9   | .00            | .86  |
|            |     |           |              | UKB Non-Hispanic white  | 1    | .414  | -.008  | .00052         |      |
|            |     |           |              | UKB Mixed/Other         | 1    | .370  | .022   | .22            |      |
|            |     |           |              | UKB South Asian         | .99  | .464  | .007   | .66            |      |
|            |     |           |              | UKB East Asian          | .94  | .734  | -.022  | .58            |      |
|            |     |           |              | UKB African American    | 1    | .075  | .013   | .7             |      |
|            |     |           |              | GERA+GIANT+UKB Meta     |      |       |        |                |      |
|            |     |           |              | GERA Non-Hispanic white | .96  | .886  | -.024  | .0015          |      |
|            |     |           |              | GERA Latino             | .97  | .889  | -.051  | .039           |      |
|            |     |           |              | GERA East Asian         | .93  | .940  | -.041  | .24            |      |
|            |     |           |              | GERA African American   | .78  | .951  | -.016  | .81            |      |
| rs9364687  | 6   | 163817911 | G/T          | GERA South Asian        | .86  | .891  | -.171  | .12            |      |
|            |     |           |              | GERA Meta               |      | -.028 | 9.8e-5 | .00            | .56  |
|            |     |           |              | GIANT                   | 1    | .867  | -.022  | 3.6e-5         |      |
|            |     |           |              | GERA+GIANT              |      | -.024 | 1.6e-8 | .00            | .65  |
|            |     |           |              | UKB Non-Hispanic white  | 1    | .880  | -.018  | 9.7e-8         |      |
|            |     |           |              | UKB Mixed/Other         | .97  | .910  | -.021  | .47            |      |
|            |     |           |              | GERA Non-Hispanic white | .96  | .886  | -.024  | .0015          |      |
|            |     |           |              | GERA Latino             | .97  | .889  | -.051  | .039           |      |
|            |     |           |              | GERA East Asian         | .93  | .940  | -.041  | .24            |      |
|            |     |           |              | GERA African American   | .78  | .951  | -.016  | .81            |      |
|            |     |           |              | GERA South Asian        | .86  | .891  | -.171  | .12            |      |
|            |     |           |              | GERA Meta               |      | -.028 | 9.8e-5 | .00            | .56  |
|            |     |           |              | GIANT                   | 1    | .867  | -.022  | 3.6e-5         |      |
|            |     |           |              | GERA+GIANT              |      | -.024 | 1.6e-8 | .00            | .65  |
|            |     |           |              | UKB Non-Hispanic white  | 1    | .880  | -.018  | 9.7e-8         |      |
|            |     |           |              | UKB Mixed/Other         | .97  | .910  | -.021  | .47            |      |
|            |     |           |              | GERA Non-Hispanic white | .96  | .886  | -.024  | .0015          |      |
|            |     |           |              | GERA Latino             | .97  | .889  | -.051  | .039           |      |
|            |     |           |              | GERA East Asian         | .93  | .940  | -.041  | .24            |      |
|            |     |           |              | GERA African American   | .78  | .951  | -.016  | .81            |      |
|            |     |           |              | GERA South Asian        | .86  | .891  | -.171  | .12            |      |
|            |     |           |              | GERA Meta               |      | -.028 | 9.8e-5 | .00            | .56  |
|            |     |           |              | GIANT                   | 1    | .867  | -.022  | 3.6e-5         |      |
|            |     |           |              | GERA+GIANT              |      | -.024 | 1.6e-8 | .00            | .65  |
|            |     |           |              | UKB Non-Hispanic white  | 1    | .880  | -.018  | 9.7e-8         |      |
|            |     |           |              | UKB Mixed/Other         | .97  | .910  | -.021  | .47            |      |
| rs6471932  | 8   | 62078904  | T/A          | UKB African American    | 1    | .075  | .013   | .7             |      |
|            |     |           |              | GERA+GIANT+UKB Meta     |      |       |        |                |      |
|            |     |           |              | GERA Non-Hispanic white | .96  | .886  | -.024  | .0015          |      |
|            |     |           |              | GERA Latino             | .97  | .889  | -.051  | .039           |      |
|            |     |           |              | GERA East Asian         | .93  | .940  | -.041  | .24            |      |
|            |     |           |              | GERA African American   | .78  | .951  | -.016  | .81            |      |
|            |     |           |              | GERA South Asian        | .86  | .891  | -.171  | .12            |      |
|            |     |           |              | GERA Meta               |      | -.028 | 9.8e-5 | .00            | .56  |
|            |     |           |              | GIANT                   | 1    | .867  | -.022  | 3.6e-5         |      |
|            |     |           |              | GERA+GIANT              |      | -.024 | 1.6e-8 | .00            | .65  |
|            |     |           |              | UKB Non-Hispanic white  | 1    | .880  | -.018  | 9.7e-8         |      |
|            |     |           |              | UKB Mixed/Other         | .97  | .910  | -.021  | .47            |      |
|            |     |           |              | GERA Non-Hispanic white | .96  | .886  | -.024  | .0015          |      |
|            |     |           |              | GERA Latino             | .97  | .889  | -.051  | .039           |      |
|            |     |           |              | GERA East Asian         | .93  | .940  | -.041  | .24            |      |
|            |     |           |              | GERA African American   | .78  | .951  | -.016  | .81            |      |
|            |     |           |              | GERA South Asian        | .86  | .891  | -.171  | .12            |      |
|            |     |           |              | GERA Meta               |      | -.028 | 9.8e-5 | .00            | .56  |

| SNP         | Chr | Pos      | Allele Group | Info                    | Freq | Eff  | P             | I <sup>2</sup> | hetp  |
|-------------|-----|----------|--------------|-------------------------|------|------|---------------|----------------|-------|
| rs12352785  | 9   | 6956850  | A/C          | UKB South Asian         | .96  | .863 | -.017 .45     |                |       |
|             |     |          |              | UKB East Asian          | .83  | .923 | .146 .032     |                |       |
|             |     |          |              | UKB African American    | .77  | .958 | -.038 .4      |                |       |
|             |     |          |              | GERA+GIANT+UKB Meta     |      |      |               |                |       |
|             |     |          |              | GERA Non-Hispanic white | .99  | .687 | -.021 4.9e-5  |                |       |
|             |     |          |              | GERA Latino             | .99  | .758 | -.027 .13     |                |       |
|             |     |          |              | GERA East Asian         | .97  | .979 | -.018 .74     |                |       |
|             |     |          |              | GERA African American   | .98  | .771 | -.063 .039    |                |       |
|             |     |          |              | GERA South Asian        | .99  | .907 | -.115 .3      |                |       |
|             |     |          |              | GERA Meta               |      |      |               | .00            | .63   |
|             |     |          |              | GIANT                   | 1    | .742 | -.016 1.6e-6  |                |       |
|             |     |          |              | GERA+GIANT              |      |      |               | .00            | .56   |
|             |     |          |              | UKB Non-Hispanic white  | .99  | .685 | -.008 .00044  |                |       |
|             |     |          |              | UKB Mixed/Other         | 1    | .768 | -.037 .064    |                |       |
|             |     |          |              | UKB South Asian         | 1    | .895 | -.013 .59     |                |       |
| rs118067556 | 10  | 63136165 | C/T          | UKB East Asian          | .77  | .993 |               |                |       |
|             |     |          |              | UKB African American    | .99  | .781 | -.023 .23     |                |       |
|             |     |          |              | GERA+GIANT+UKB Meta     |      |      |               |                |       |
|             |     |          |              | GERA Non-Hispanic white | .92  | .038 | -.055 2.1e-5  |                |       |
|             |     |          |              | GERA Latino             | .87  | .025 | -.033 .53     |                |       |
|             |     |          |              | GERA East Asian         | .66  | .003 | -.080 .63     |                |       |
|             |     |          |              | GERA African American   | .82  | .009 | -.051 .72     |                |       |
|             |     |          |              | GERA South Asian        | .88  | .079 | -.218 .079    |                |       |
|             |     |          |              | GERA Meta               |      |      |               | .00            | .75   |
|             |     |          |              | GIANT                   | .71  | .962 | -.037 8.5e-5  |                |       |
|             |     |          |              | GERA+GIANT              |      |      |               | .00            | .64   |
|             |     |          |              | UKB Non-Hispanic white  | 1    | .029 | -.029 9.3e-6  |                |       |
|             |     |          |              | UKB Mixed/Other         | 1    | .026 | -.062 .23     |                |       |
|             |     |          |              | UKB South Asian         | 1    | .055 | -.046 .14     |                |       |
|             |     |          |              | UKB East Asian          | 1    | .001 |               |                |       |
| rs10742752  | 11  | 45438374 | C/T          | UKB African American    | 1    | .004 |               |                |       |
|             |     |          |              | GERA+GIANT+UKB Meta     |      |      |               |                |       |
|             |     |          |              | GERA Non-Hispanic white | 1    | .619 | .021 1.3e-5   |                |       |
|             |     |          |              | GERA Latino             | .98  | .703 | -.048 .0042   |                |       |
|             |     |          |              | GERA East Asian         | .96  | .576 | .017 .29      |                |       |
|             |     |          |              | GERA African American   | .97  | .764 | .040 .19      |                |       |
|             |     |          |              | GERA South Asian        | 1    | .673 | .089 .19      |                |       |
|             |     |          |              | GERA Meta               |      |      |               | 77.05          | .0016 |
|             |     |          |              | GIANT                   | 1    | .642 | .014 6.5e-6   |                |       |
|             |     |          |              | GERA+GIANT              |      |      |               | 71.73          | .0034 |
|             |     |          |              | UKB Non-Hispanic white  | 1    | .612 | .012 5e-8     |                |       |
|             |     |          |              | UKB Mixed/Other         | 1    | .670 | .002 .91      |                |       |
|             |     |          |              | UKB South Asian         | .99  | .655 | .032 .042     |                |       |
|             |     |          |              | UKB East Asian          | .97  | .567 | -.055 .11     |                |       |
|             |     |          |              | UKB African American    | .99  | .796 | .021 .29      |                |       |
| rs11170468  | 12  | 39430048 | A/C          | GERA+GIANT+UKB Meta     |      |      |               |                |       |
|             |     |          |              | GERA Non-Hispanic white | .99  | .235 | -.013 .023    |                |       |
|             |     |          |              | GERA Latino             | .99  | .173 | -.000 1       |                |       |
|             |     |          |              | GERA East Asian         | .97  | .021 | -.036 .51     |                |       |
|             |     |          |              | GERA African American   | .98  | .216 | .014 .64      |                |       |
|             |     |          |              | GERA South Asian        | .96  | .081 | -.124 .31     |                |       |
|             |     |          |              | GERA Meta               |      |      |               | .00            | .71   |
|             |     |          |              | GIANT                   | 1    | .192 | -.019 7e-8    |                |       |
|             |     |          |              | GERA+GIANT              |      |      |               | .00            | .6    |
|             |     |          |              | UKB Non-Hispanic white  | 1    | .234 | -.012 2.9e-6  |                |       |
|             |     |          |              | UKB Mixed/Other         | 1    | .160 | .026 .24      |                |       |
|             |     |          |              | UKB South Asian         | 1    | .086 | -.018 .51     |                |       |
|             |     |          |              | UKB East Asian          | .97  | .011 | -.192 .23     |                |       |
|             |     |          |              | UKB African American    | .98  | .183 | .008 .7       |                |       |
|             |     |          |              | GERA+GIANT+UKB Meta     |      |      |               |                |       |
| rs1819844   | 12  | 68205604 | A/G          | GERA Non-Hispanic white | .99  | .823 | -.028 6.5e-6  |                |       |
|             |     |          |              | GERA Latino             | .99  | .795 | -.044 .024    |                |       |
|             |     |          |              | GERA East Asian         | .99  | .766 | .005 .78      |                |       |
|             |     |          |              | GERA African American   | .98  | .898 | .003 .94      |                |       |
|             |     |          |              | GERA South Asian        | .99  | .793 | -.087 .28     |                |       |
|             |     |          |              | GERA Meta               |      |      |               | 16.92          | .31   |
|             |     |          |              | GIANT                   | 1    | .833 | -.015 9.3e-5  |                |       |
|             |     |          |              | GERA+GIANT              |      |      |               | 32.58          | .19   |
|             |     |          |              | UKB Non-Hispanic white  | 1    | .829 | -.014 8.1e-7  |                |       |
|             |     |          |              | UKB Mixed/Other         | 1    | .824 | -.026 .22     |                |       |
|             |     |          |              | UKB South Asian         | 1    | .776 | .004 .84      |                |       |
|             |     |          |              | UKB East Asian          | 1    | .745 | -.071 .058    |                |       |
|             |     |          |              | UKB African American    | .91  | .917 | -.023 .44     |                |       |
|             |     |          |              | GERA+GIANT+UKB Meta     |      |      |               |                |       |
|             |     |          |              | GERA Non-Hispanic white | .99  | .776 | -.021 .00026  |                |       |
| rs2372716   | 12  | 99573426 | C/T          | GERA Latino             | 1    | .845 | -.006 .77     |                |       |
|             |     |          |              | GERA East Asian         | 1    | .983 | .005 .94      |                |       |
|             |     |          |              | GERA African American   | .97  | .944 | -.067 .23     |                |       |
|             |     |          |              | GERA South Asian        | .97  | .875 | .031 .75      |                |       |
|             |     |          |              | GERA Meta               |      |      |               | .00            | .81   |
|             |     |          |              | GIANT                   | 1    | .767 | -.015 2.9e-5  |                |       |
|             |     |          |              | GERA+GIANT              |      |      |               | .00            | .83   |
|             |     |          |              | UKB Non-Hispanic white  | 1    | .779 | -.015 1.2e-8  |                |       |
|             |     |          |              | UKB Mixed/Other         | 1    | .865 | -.027 .28     |                |       |
|             |     |          |              | UKB South Asian         | .98  | .889 | -.004 .86     |                |       |
|             |     |          |              | UKB East Asian          | .83  | .990 | -.193 .3      |                |       |
|             |     |          |              | UKB African American    | .87  | .950 | .057 .15      |                |       |
|             |     |          |              | GERA+GIANT+UKB Meta     |      |      |               |                |       |
|             |     |          |              | GERA Non-Hispanic white | .98  | .374 | -.020 5.7e-5  |                |       |
|             |     |          |              | GERA Latino             | .98  | .315 | -.015 .36     |                |       |
| rs9595908   | 13  | 33184288 | T/C          | GERA East Asian         | .99  | .166 | -.029 .17     |                |       |
|             |     |          |              | GERA African American   | .97  | .258 | -.017 .57     |                |       |
|             |     |          |              | GERA South Asian        | .96  | .195 | .068 .4       |                |       |
|             |     |          |              | GERA Meta               |      |      |               | .00            | .84   |
|             |     |          |              | GIANT                   | 1    | .342 | -.014 6e-6    |                |       |
|             |     |          |              | GERA+GIANT              |      |      |               | .00            | .78   |
|             |     |          |              | UKB Non-Hispanic white  | 1    | .370 | -.017 1.6e-14 |                |       |
|             |     |          |              | UKB Mixed/Other         | 1    | .291 | -.002 .93     |                |       |
|             |     |          |              | UKB South Asian         | 1    | .243 | .001 .94      |                |       |
|             |     |          |              | UKB East Asian          | 1    | .157 | .043 .34      |                |       |
|             |     |          |              | UKB African American    | .99  | .250 | -.027 .13     |                |       |
|             |     |          |              | GERA+GIANT+UKB Meta     |      |      |               |                |       |
|             |     |          |              | GERA Non-Hispanic white | 1    | .171 | -.031 6.4e-7  |                |       |
|             |     |          |              | GERA Latino             | 1    | .151 | -.022 .3      |                |       |
|             |     |          |              | GERA East Asian         | .98  | .391 | -.013 .43     |                |       |
| rs9563576   | 13  | 58670147 | C/T          | GERA African American   | .99  | .096 | -.093 .032    |                |       |
|             |     |          |              | GERA South Asian        | .99  | .392 | -.070 .31     |                |       |
|             |     |          |              |                         |      |      |               |                |       |

| SNP        | Chr | Pos       | Allele Group | Info                    | Freq | Eff  | P             | I <sup>2</sup> | hetp |
|------------|-----|-----------|--------------|-------------------------|------|------|---------------|----------------|------|
| rs7161194  | 14  | 101529005 | A/G          | GERA Meta               |      |      | -.030 9.7e-8  | .00            | .45  |
|            |     |           |              | GIANT                   | 1    | .208 | -.018 5.4e-6  |                |      |
|            |     |           |              | GERA+GIANT              |      |      | -.022 9.7e-12 | 26.12          | .24  |
|            |     |           |              | UKB Non-Hispanic white  | 1    | .173 | -.025 8.6e-18 |                |      |
|            |     |           |              | UKB Mixed/Other         | 1    | .205 | -.018 .4      |                |      |
|            |     |           |              | UKB South Asian         | .99  | .359 | -.023 .13     |                |      |
|            |     |           |              | UKB East Asian          | .99  | .390 | -.002 .96     |                |      |
|            |     |           |              | UKB African American    | 1    | .082 | -.018 .52     |                |      |
|            |     |           |              | GERA+GIANT+UKB Meta     |      |      |               |                |      |
|            |     |           |              | GERA Non-Hispanic white | .9   | .662 | -.022 2.6e-5  |                |      |
|            |     |           |              | GERA Latino             | .95  | .640 | -.010 .56     |                |      |
|            |     |           |              | GERA East Asian         | .89  | .721 | -.026 .17     |                |      |
|            |     |           |              | GERA African American   | .94  | .493 | -.009 .72     |                |      |
|            |     |           |              | GERA South Asian        | .86  | .585 | .041 .54      |                |      |
|            |     |           |              | GERA Meta               |      |      | -.021 1.5e-5  | .00            | .8   |
|            |     |           |              | GIANT                   | 1    | .642 | -.017 2.5e-5  |                |      |
|            |     |           |              | GERA+GIANT              |      |      | -.019 1.5e-9  | .00            | .85  |
|            |     |           |              | UKB Non-Hispanic white  | .91  | .664 | -.018 2.2e-13 |                |      |
|            |     |           |              | UKB Mixed/Other         | .9   | .630 | -.026 .16     |                |      |
|            |     |           |              | UKB South Asian         | .83  | .636 | -.015 .35     |                |      |
|            |     |           |              | UKB East Asian          | .88  | .749 | .012 .77      |                |      |
|            |     |           |              | UKB African American    | .89  | .494 | -.040 .016    |                |      |
|            |     |           |              | GERA+GIANT+UKB Meta     |      |      |               |                |      |
| rs4238331  | 15  | 59012133  | T/G          | GERA Non-Hispanic white | .94  | .714 | -.023 3.1e-5  |                |      |
|            |     |           |              | GERA Latino             | .96  | .624 | -.021 .2      |                |      |
|            |     |           |              | GERA East Asian         | .97  | .593 | -.042 .011    |                |      |
|            |     |           |              | GERA African American   | .97  | .508 | -.038 .14     |                |      |
|            |     |           |              | GERA South Asian        | .91  | .514 | .014 .84      |                |      |
|            |     |           |              | GERA Meta               |      |      | -.024 3.7e-7  | .00            | .75  |
|            |     |           |              | GIANT                   | 1    | .717 | -.012 .0011   |                |      |
|            |     |           |              | GERA+GIANT              |      |      | -.017 1.4e-8  | 18.14          | .3   |
|            |     |           |              | UKB Non-Hispanic white  | 1    | .717 | -.006 .015    |                |      |
|            |     |           |              | UKB Mixed/Other         | 1    | .617 | -.049 .0042   |                |      |
|            |     |           |              | UKB South Asian         | 1    | .547 | -.017 .26     |                |      |
|            |     |           |              | UKB East Asian          | 1    | .555 | .023 .48      |                |      |
|            |     |           |              | UKB African American    | 1    | .465 | -.015 .34     |                |      |
|            |     |           |              | GERA+GIANT+UKB Meta     |      |      |               |                |      |
|            |     |           |              | GERA Non-Hispanic white | 1    | .169 | -.021 .0008   |                |      |
|            |     |           |              | GERA Latino             | 1    | .218 | -.022 .24     |                |      |
|            |     |           |              | GERA East Asian         | 1    | .710 | -.031 .074    |                |      |
|            |     |           |              | GERA African American   | .98  | .159 | -.056 .1      |                |      |
|            |     |           |              | GERA South Asian        | 1    | .289 | .014 .85      |                |      |
|            |     |           |              | GERA Meta               |      |      | -.023 3.6e-5  | .00            | .84  |
|            |     |           |              | GIANT                   | 1    | .183 | -.018 .00023  |                |      |
|            |     |           |              | GERA+GIANT              |      |      | -.020 4e-8    | .00            | .85  |
|            |     |           |              | UKB Non-Hispanic white  | 1    | .171 | -.011 .0001   |                |      |
|            |     |           |              | UKB Mixed/Other         | 1    | .245 | -.033 .1      |                |      |
|            |     |           |              | UKB South Asian         | 1    | .292 | .013 .44      |                |      |
|            |     |           |              | UKB East Asian          | 1    | .745 | -.022 .57     |                |      |
|            |     |           |              | UKB African American    | 1    | .148 | -.003 .88     |                |      |
|            |     |           |              | GERA+GIANT+UKB Meta     |      |      |               |                |      |
| rs1439620  | 15  | 93429646  | A/G          | GERA Non-Hispanic white | .99  | .670 | -.009 .09     |                |      |
|            |     |           |              | GERA Latino             | .98  | .687 | -.033 .048    |                |      |
|            |     |           |              | GERA East Asian         | .98  | .912 | -.061 .032    |                |      |
|            |     |           |              | GERA African American   | .98  | .566 | -.027 .29     |                |      |
|            |     |           |              | GERA South Asian        | .98  | .630 | .010 .88      |                |      |
|            |     |           |              | GERA Meta               |      |      | -.013 .0076   | 26.07          | .25  |
|            |     |           |              | GIANT                   | 1    | .717 | -.016 2.4e-6  |                |      |
|            |     |           |              | GERA+GIANT              |      |      | -.015 5e-8    | 12.58          | .33  |
|            |     |           |              | UKB Non-Hispanic white  | 1    | .684 | -.003 .14     |                |      |
|            |     |           |              | UKB Mixed/Other         | 1    | .667 | -.015 .4      |                |      |
|            |     |           |              | UKB South Asian         | 1    | .643 | -.015 .33     |                |      |
|            |     |           |              | UKB East Asian          | .97  | .927 | .083 .21      |                |      |
|            |     |           |              | UKB African American    | 1    | .559 | -.002 .9      |                |      |
|            |     |           |              | GERA+GIANT+UKB Meta     |      |      |               |                |      |
|            |     |           |              | GERA Non-Hispanic white | .97  | .283 | .020 .00014   |                |      |
|            |     |           |              | GERA Latino             | .97  | .340 | .010 .55      |                |      |
|            |     |           |              | GERA East Asian         | .96  | .134 | .026 .28      |                |      |
|            |     |           |              | GERA African American   | .97  | .133 | .112 .0034    |                |      |
|            |     |           |              | GERA South Asian        | .94  | .171 | -.011 .9      |                |      |
|            |     |           |              | GERA Meta               |      |      | .021 1.8e-5   | 36.46          | .18  |
|            |     |           |              | GIANT                   | 1    | .250 | .016 8e-6     |                |      |
|            |     |           |              | GERA+GIANT              |      |      | .018 9.3e-10  | 27.51          | .23  |
|            |     |           |              | UKB Non-Hispanic white  | 1    | .279 | .006 .019     |                |      |
|            |     |           |              | UKB Mixed/Other         | 1    | .221 | .053 .0092    |                |      |
|            |     |           |              | UKB South Asian         | 1    | .167 | .022 .26      |                |      |
|            |     |           |              | UKB East Asian          | .97  | .106 | .030 .58      |                |      |
|            |     |           |              | UKB African American    | 1    | .097 | -.021 .44     |                |      |
|            |     |           |              | GERA+GIANT+UKB Meta     |      |      |               |                |      |
| rs11081818 | 18  | 31251088  | A/G          | GERA Non-Hispanic white | .99  | .439 | .023 1.5e-6   |                |      |
|            |     |           |              | GERA Latino             | .99  | .535 | .008 .6       |                |      |
|            |     |           |              | GERA East Asian         | .98  | .768 | .010 .58      |                |      |
|            |     |           |              | GERA African American   | .97  | .341 | .036 .18      |                |      |
|            |     |           |              | GERA South Asian        | .95  | .434 | -.082 .24     |                |      |
|            |     |           |              | GERA Meta               |      |      | .021 1.5e-6   | .00            | .44  |
|            |     |           |              | GIANT                   | 1    | .425 | .013 .0004    |                |      |
|            |     |           |              | GERA+GIANT              |      |      | .016 6.4e-9   | 12.44          | .34  |
|            |     |           |              | UKB Non-Hispanic white  | 1    | .445 | .013 1.7e-9   |                |      |
|            |     |           |              | UKB Mixed/Other         | 1    | .457 | -.014 .42     |                |      |
|            |     |           |              | UKB South Asian         | 1    | .492 | .009 .55      |                |      |
|            |     |           |              | UKB East Asian          | 1    | .792 | -.094 .021    |                |      |
|            |     |           |              | UKB African American    | .98  | .314 | .007 .66      |                |      |
|            |     |           |              | GERA+GIANT+UKB Meta     |      |      |               |                |      |
|            |     |           |              | GERA Non-Hispanic white | 1    | .530 | .019 8.4e-5   |                |      |
|            |     |           |              | GERA Latino             | .98  | .534 | .022 .15      |                |      |
|            |     |           |              | GERA East Asian         | 1    | .571 | .009 .58      |                |      |
|            |     |           |              | GERA African American   | 1    | .175 | .011 .74      |                |      |
|            |     |           |              | GERA South Asian        | 1    | .666 | -.020 .78     |                |      |
|            |     |           |              | GERA Meta               |      |      | .018 3.3e-5   | .00            | .94  |
|            |     |           |              | GIANT                   | 1    | .542 | .015 7.1e-5   |                |      |
|            |     |           |              | GERA+GIANT              |      |      | .016 1.1e-8   | .00            | .95  |
|            |     |           |              | UKB Non-Hispanic white  | 1    | .519 | .013 3.9e-10  |                |      |
|            |     |           |              | UKB Mixed/Other         | 1    | .476 | .039 .025     |                |      |
|            |     |           |              | UKB South Asian         | 1    | .632 | -.015 .33     |                |      |
|            |     |           |              | UKB East Asian          | 1    | .583 | -.028 .4      |                |      |
|            |     |           |              | UKB African American    | 1    | .122 | -.033 .22     |                |      |
|            |     |           |              | GERA+GIANT+UKB Meta     |      |      |               |                |      |
| rs6142096  | 20  | 32686658  | A/G          | GERA Non-Hispanic white | 1    | .530 | .019 8.4e-5   |                |      |
|            |     |           |              | GERA Latino             | .98  | .534 | .022 .15      |                |      |
|            |     |           |              | GERA East Asian         | 1    | .571 | .009 .58      |                |      |
|            |     |           |              | GERA African American   | 1    | .175 | .011 .74      |                |      |
|            |     |           |              | GERA South Asian        | 1    | .666 | -.020 .78     |                |      |
|            |     |           |              | GERA Meta               |      |      | .018 3.3e-5   | .00            | .94  |
|            |     |           |              | GIANT                   | 1    | .542 | .015 7.1e-5   |                |      |
|            |     |           |              | GERA+GIANT              |      |      | .016 1.1e-8   | .00            | .95  |
|            |     |           |              | UKB Non-Hispanic white  | 1    | .519 | .013 3.9e-10  |                |      |
|            |     |           |              | UKB Mixed/Other         | 1    | .476 | .039 .025     |                |      |
|            |     |           |              | UKB South Asian         | 1    | .632 | -.015 .33     |                |      |
|            |     |           |              | UKB East Asian          | 1    | .583 | -.028 .4      |                |      |
|            |     |           |              | UKB African American    | 1    | .122 | -.033 .22     |                |      |
|            |     |           |              | GERA+GIANT+UKB Meta     |      |      |               |                |      |
|            |     |           |              | GERA Non-Hispanic white | 1    | .530 | .019 8.4e-5   |                |      |
|            |     |           |              | GERA Latino             | .98  | .534 | .022 .15      |                |      |
|            |     |           |              | GERA East Asian         | 1    | .571 | .009 .58      |                |      |
|            |     |           |              | GERA African American   | 1    | .175 | .011 .74      |                |      |
|            |     |           |              | GERA South Asian        | 1    | .666 | -.020 .78     |                |      |
|            |     |           |              | GERA Meta               |      |      | .018 3.3e-5   | .00            | .94  |
|            |     |           |              | GIANT                   | 1    | .542 | .015 7.1e-5   |                |      |
|            |     |           |              | GERA+GIANT              |      |      | .016 1.1e-8   | .00            | .95  |
|            |     |           |              | UKB Non-Hispanic white  | 1    | .519 | .013 3.9e-10  |                |      |
|            |     |           |              | UKB Mixed/Other         | 1    | .476 | .039 .025     |                |      |
|            |     |           |              | UKB South Asian         | 1    | .632 | -.015 .33     |                |      |
|            |     |           |              | UKB East Asian          | 1    | .583 | -.028 .4      |                |      |
|            |     |           |              | UKB African American    | 1    | .122 | -.033 .22     |                |      |
|            |     |           |              | GERA+GIANT+UKB Meta     |      |      |               |                |      |

| SNP        | Chr | Pos      | Allele | Group                   | Info | Freq | Eff   | P      | I <sup>2</sup> | hetp |
|------------|-----|----------|--------|-------------------------|------|------|-------|--------|----------------|------|
| rs17759796 | 22  | 22190163 | A/C    | GERA Non-Hispanic white | 1    | .149 | .025  | .00018 |                |      |
|            |     |          |        | GERA Latino             | .99  | .113 | .024  | .34    |                |      |
|            |     |          |        | GERA East Asian         | 1    | .010 | .047  | .55    |                |      |
|            |     |          |        | GERA African American   | .99  | .064 | .006  | .9     |                |      |
|            |     |          |        | GERA South Asian        | .99  | .115 | .029  | .78    |                |      |
|            |     |          |        | GERA Meta               |      |      | .025  | 9.9e-5 | .00            | .99  |
|            |     |          |        | GIANT                   | 1    | .133 | .018  | 4.2e-5 |                |      |
|            |     |          |        | GERA+GIANT              |      |      | .020  | 2.5e-8 | .00            | .96  |
|            |     |          |        | UKB Non-Hispanic white  | 1    | .148 | .011  | .00051 |                |      |
|            |     |          |        | UKB Mixed/Other         | 1    | .114 | -.005 | .86    |                |      |
|            |     |          |        | UKB South Asian         | 1    | .117 | -.019 | .42    |                |      |
|            |     |          |        | UKB East Asian          | .98  | .003 |       |        |                |      |
|            |     |          |        | UKB African American    | 1    | .059 | .024  | .48    |                |      |
|            |     |          |        | GERA+GIANT+UKB Meta     |      |      |       |        |                |      |

**Table S6. Conditional SNPs.** Conditional SNPs within +/- 0.5Mb of a previously- or newly-identified BMI-associated loci with genome-wide significance. SNP rs62106258 is a novel conditional SNP at rs10188334 near *TMEM18*, identified in GERA, with replication in UKB.

| Lead SNP   | Lead Chr | Lead Pos | SNP        | Pos      | Allele | Cohort                  | Freq  | r <sup>2</sup> | info   | Eff U   | P U    | Eff J   | P J |
|------------|----------|----------|------------|----------|--------|-------------------------|-------|----------------|--------|---------|--------|---------|-----|
| rs10188334 | 2        | 653874   | rs10188334 | 653874   | C/T    | GERA non-Hispanic white | 0.822 | 0.96           | 0.054  | 8.1e-17 | 0.055  | 3e-17   |     |
|            |          |          |            | 653874   |        | GERA Latino             | 0.852 | 0.98           | 0.116  | 1.2e-07 | 0.115  | 1.8e-07 |     |
|            |          |          |            | 653874   |        | GERA East Asian         | 0.909 | 0.973          | 0.080  | 0.0047  | 0.081  | 0.0042  |     |
|            |          |          |            | 653874   |        | GERA African American   | 0.868 | 0.948          | 0.023  | 0.54    | 0.023  | 0.54    |     |
|            |          |          |            | 653874   |        | GERA South Asian        | 0.855 | 0.933          | -0.002 | 0.98    | -0.001 | 0.99    |     |
|            |          |          | rs62106258 | 653874   |        | GERA Meta               |       |                | 0.059  | 8.1e-23 | 0.060  | 3.1e-23 |     |
|            |          |          |            | 417167   | T/C    | GERA non-Hispanic white | 0.952 | 0.986          | 0.097  | 3.4e-17 | 0.098  | 1.2e-17 |     |
|            |          |          |            | 417167   |        | GERA Latino             | 0.961 | 0.823          | 0.065  | 0.14    | 0.053  | 0.23    |     |
|            |          |          |            | 417167   |        | GERA East Asian         | 0.994 | 0.534          | 0.267  | 0.058   | 0.274  | 0.052   |     |
|            |          |          |            | 417167   |        | GERA African American   | 0.982 | 0.614          | -0.046 | 0.7     | -0.046 | 0.7     |     |
|            |          |          |            | 417167   |        | GERA South Asian        | 0.992 | 1              | 0.113  | 0.76    | 0.113  | 0.76    |     |
|            |          |          |            | 417167   |        | GERA Meta               |       |                | 0.095  | 8.6e-18 | 0.095  | 5.8e-18 |     |
|            |          |          |            |          |        |                         |       |                |        |         |        |         |     |
|            |          |          |            |          |        |                         |       |                |        |         |        |         |     |
|            |          |          |            |          |        |                         |       |                |        |         |        |         |     |
|            |          |          |            |          |        |                         |       |                |        |         |        |         |     |
|            |          |          |            |          |        |                         |       |                |        |         |        |         |     |
| rs921971   | 18       | 57861663 | rs921971   | 57861663 | T/C    | GERA non-Hispanic white | 0.735 | 1              | -0.045 | 7.2e-16 | -0.043 | 1.3e-14 |     |
|            |          |          |            | 57861663 |        | GERA Latino             | 0.816 | 1              | -0.047 | 0.015   | -0.045 | 0.021   |     |
|            |          |          |            | 57861663 |        | GERA East Asian         | 0.825 | 1              | -0.061 | 0.0046  | -0.060 | 0.0053  |     |
|            |          |          |            | 57861663 |        | GERA African American   | 0.841 | 1              | -0.085 | 0.0067  | -0.085 | 0.0067  |     |
|            |          |          |            | 57861663 |        | GERA South Asian        | 0.639 | 1              | 0.071  | 0.31    | 0.060  | 0.39    |     |
|            |          |          | rs77762545 | 57861663 |        | GERA Meta               |       |                | -0.046 | 1e-19   | -0.044 | 2.7e-18 |     |
|            |          |          |            | 58077407 | T/A    | GERA non-Hispanic white | 0.981 | 0.982          | 0.100  | 3.7e-08 | 0.090  | 7.1e-07 |     |
|            |          |          |            | 58077407 |        | GERA Latino             | 0.991 | 0.945          | 0.278  | 0.00096 | 0.271  | 0.0013  |     |
|            |          |          |            | 58077407 |        | GERA East Asian         | 0.997 | 0.957          | 0.420  | 0.003   | 0.414  | 0.0035  |     |
|            |          |          |            | 58077407 |        | GERA African American   | 0.983 | 0.945          | 0.012  | 0.91    | -0.001 | 0.99    |     |
|            |          |          |            | 58077407 |        | GERA South Asian        | 0.974 | 0.979          | -0.304 | 0.14    | -0.283 | 0.18    |     |
|            |          |          |            | 58077407 |        | GERA Meta               |       |                | 0.107  | 6.3e-10 | 0.097  | 1.8e-08 |     |
|            |          |          |            |          |        |                         |       |                |        |         |        |         |     |
|            |          |          |            |          |        |                         |       |                |        |         |        |         |     |
|            |          |          |            |          |        |                         |       |                |        |         |        |         |     |
|            |          |          |            |          |        |                         |       |                |        |         |        |         |     |
|            |          |          |            |          |        |                         |       |                |        |         |        |         |     |

**Table S7. Sex heterogeneity tests at novel and previously known loci.** P, previously-identified, G, GERA-identified, GG, GERA+GIANT-identified.

| SNP         | Chr | Pos       | Allele | Type | M Eff    | M SE   | F Eff    | F SE   | Meta Eff | Meta P  | Meta $i^2$ | Meta Het. | P |
|-------------|-----|-----------|--------|------|----------|--------|----------|--------|----------|---------|------------|-----------|---|
| rs2803328   | 1   | 1874326   | C/G    | P    | -0.0012  | 0.0069 | -0.0041  | 0.0058 | -0.0029  | 0.52    | 0          | 0.74      |   |
| rs7535528   | 1   | 2444414   | G/A    | P    | 0.025    | 0.009  | 0.011    | 0.0076 | 0.017    | 0.0041  | 30         | 0.23      |   |
| rs12711521  | 1   | 11090916  | C/A    | P    | 0.0027   | 0.0083 | -0.0069  | 0.007  | -0.0029  | 0.59    | 0          | 0.38      |   |
| rs3766160   | 1   | 15808872  | G/A    | P    | 0.027    | 0.0077 | 0.0021   | 0.0065 | 0.012    | 0.012   | 84         | 0.012     |   |
| rs10799790  | 1   | 23418153  | C/T    | P    | 0.011    | 0.0087 | 0.0072   | 0.0073 | 0.0089   | 0.11    | 0          | 0.71      |   |
| rs2076463   | 1   | 27971092  | A/G    | P    | 0.014    | 0.017  | 2.3e-05  | 0.014  | 0.0057   | 0.6     | 0          | 0.54      |   |
| rs2271928   | 1   | 32127953  | G/A    | P    | 0.012    | 0.0071 | 0.0046   | 0.006  | 0.0077   | 0.092   | 0          | 0.42      |   |
| rs2228552   | 1   | 32165495  | G/T    | P    | -0.02    | 0.0084 | -0.0061  | 0.007  | -0.012   | 0.03    | 35         | 0.21      |   |
| rs2296172   | 1   | 39835817  | A/G    | P    | -0.041   | 0.0083 | -0.025   | 0.007  | -0.032   | 2.9e-09 | 54         | 0.14      |   |
| rs1707322   | 1   | 46505147  | A/G    | P    | -0.0045  | 0.0074 | 0.00088  | 0.0062 | -0.0013  | 0.78    | 0          | 0.58      |   |
| rs977747    | 1   | 47684677  | T/G    | P    | 0.011    | 0.0071 | 0.02     | 0.0059 | 0.017    | 0.00024 | 0          | 0.33      |   |
| rs11583200  | 1   | 50559820  | C/T    | P    | 0.0078   | 0.0071 | 0.027    | 0.0059 | 0.019    | 1.9e-05 | 78         | 0.033     |   |
| rs12140153  | 1   | 62579891  | G/T    | P    | 0.026    | 0.014  | 0.037    | 0.012  | 0.032    | 0.0004  | 0          | 0.54      |   |
| rs2481665   | 1   | 62594677  | T/C    | P    | 0.028    | 0.0072 | 0.019    | 0.006  | 0.022    | 1.2e-06 | 0          | 0.33      |   |
| rs11209943  | 1   | 72750500  | A/G    | P    | -0.038   | 0.0072 | -0.025   | 0.006  | -0.03    | 5.4e-11 | 48         | 0.17      |   |
| rs12042908  | 1   | 74997762  | A/G    | P    | 0.016    | 0.007  | 0.017    | 0.0058 | 0.017    | 0.00019 | 0          | 0.9       |   |
| rs4130548   | 1   | 78463868  | T/C    | P    | -0.028   | 0.0075 | -0.024   | 0.0062 | -0.026   | 9.8e-08 | 0          | 0.74      |   |
| rs540742    | 1   | 78585086  | T/C    | P    | 0.027    | 0.0081 | 0.011    | 0.0067 | 0.017    | 0.00076 | 54         | 0.14      |   |
| rs11165643  | 1   | 96924097  | C/T    | P    | -0.011   | 0.007  | -0.013   | 0.0058 | -0.013   | 0.0046  | 0          | 0.82      |   |
| rs1801265   | 1   | 98348885  | G/A    | P    | 0.0065   | 0.0084 | 0.0047   | 0.007  | 0.0054   | 0.31    | 0          | 0.87      |   |
| rs11185092  | 1   | 107886278 | A/G    | P    | -0.012   | 0.0081 | -0.023   | 0.0067 | -0.019   | 0.00031 | 16         | 0.27      |   |
| rs62623713  | 1   | 110019439 | A/G    | P    | -0.038   | 0.015  | -0.0071  | 0.013  | -0.02    | 0.043   | 59         | 0.12      |   |
| rs17024393  | 1   | 110154688 | T/C    | P    | -0.018   | 0.022  | -0.024   | 0.018  | -0.022   | 0.12    | 0          | 0.82      |   |
| rs197412    | 1   | 112308953 | T/C    | P    | -0.029   | 0.0069 | -0.016   | 0.0058 | -0.021   | 1.3e-06 | 51         | 0.15      |   |
| rs10923724  | 1   | 119546842 | C/T    | P    | 0.014    | 0.0067 | 0.021    | 0.0057 | 0.018    | 2.8e-05 | 0          | 0.39      |   |
| rs4512652   | 1   | 151115690 | G/C    | P    | 0.0055   | 0.0077 | 0.02     | 0.0064 | 0.014    | 0.0045  | 51         | 0.15      |   |
| rs2297792   | 1   | 156011444 | T/C    | P    | -0.0047  | 0.0072 | -0.0064  | 0.006  | -0.0057  | 0.21    | 0          | 0.86      |   |
| rs347313    | 1   | 162304276 | A/G    | P    | -0.0049  | 0.0069 | -0.0032  | 0.0057 | -0.0039  | 0.38    | 0          | 0.85      |   |
| rs10913118  | 1   | 175954755 | A/C    | P    | -0.0086  | 0.0075 | -0.0046  | 0.0062 | -0.0062  | 0.19    | 0          | 0.68      |   |
| rs574367    | 1   | 177873210 | G/T    | P    | -0.032   | 0.0086 | -0.06    | 0.0072 | -0.049   | 1.5e-18 | 84         | 0.012     |   |
| rs591120    | 1   | 177902753 | G/C    | P    | -0.0086  | 0.0068 | -0.023   | 0.0057 | -0.017   | 7.8e-05 | 64         | 0.096     |   |
| rs491055    | 1   | 190308834 | A/G    | P    | 0.022    | 0.0069 | 0.022    | 0.0058 | 0.022    | 9.7e-07 | 0          | 0.99      |   |
| rs1998710   | 1   | 190670884 | C/T    | P    | -0.0071  | 0.0068 | -0.0069  | 0.0057 | -0.007   | 0.11    | 0          | 0.99      |   |
| rs10754220  | 1   | 197244290 | G/A    | P    | 0.034    | 0.0077 | 0.014    | 0.0064 | 0.022    | 8.6e-06 | 74         | 0.049     |   |
| rs16849342  | 1   | 201754444 | G/C    | P    | -0.019   | 0.017  | -0.023   | 0.014  | -0.021   | 0.042   | 0          | 0.85      |   |
| rs2820312   | 1   | 201869257 | G/A    | P    | -0.038   | 0.0075 | -0.035   | 0.0062 | -0.037   | 2.1e-14 | 0          | 0.74      |   |
| rs823114    | 1   | 205719532 | G/A    | P    | 0.004    | 0.0068 | 0.0062   | 0.0057 | 0.0053   | 0.22    | 0          | 0.8       |   |
| rs1704198   | 1   | 213910494 | T/G    | P    | -0.011   | 0.008  | 0.0044   | 0.0067 | -0.0021  | 0.68    | 56         | 0.13      |   |
| rs9786986   | 1   | 235656632 | G/T    | P    | 0.0024   | 0.0096 | -0.012   | 0.0081 | -0.006   | 0.33    | 23         | 0.42      |   |
| rs1074657   | 1   | 243746634 | T/C    | GG   | 0.016    | 0.0073 | 0.024    | 0.0062 | 0.021    | 1.3e-05 | 0          | 0.26      |   |
| rs62106258  | 2   | 417167    | T/C    | G    | 0.079    | 0.017  | 0.1      | 0.014  | 0.093    | 9e-18   | 17         | 0.27      |   |
| rs13021737  | 2   | 632348    | A/G    | P    | -0.045   | 0.009  | -0.06    | 0.0076 | -0.054   | 2.3e-20 | 37         | 0.21      |   |
| rs10929925  | 2   | 6155557   | C/A    | P    | 0.011    | 0.0068 | 0.014    | 0.0057 | 0.013    | 0.0028  | 0          | 0.72      |   |
| rs111612372 | 2   | 20433218  | T/C    | P    | -0.0087  | 0.0073 | 0.0049   | 0.0061 | -0.00068 | 0.88    | 52         | 0.15      |   |
| rs1550116   | 2   | 25022598  | A/G    | P    | 0.0055   | 0.0096 | -0.032   | 0.008  | -0.017   | 0.0062  | 89         | 0.0024    |   |
| rs713586    | 2   | 25158008  | T/C    | P    | -0.02    | 0.0068 | -0.042   | 0.0057 | -0.033   | 1.3e-13 | 84         | 0.013     |   |
| rs1561288   | 2   | 25369002  | C/T    | P    | 0.0076   | 0.0079 | 0.013    | 0.0065 | 0.011    | 0.028   | 0          | 0.57      |   |
| rs11126666  | 2   | 269928811 | G/A    | P    | -0.01    | 0.0082 | -0.017   | 0.0068 | -0.014   | 0.0061  | 0          | 0.51      |   |
| rs3739081   | 2   | 26955621  | A/G    | P    | 0.015    | 0.0069 | 0.024    | 0.0058 | 0.02     | 7.3e-06 | 0          | 0.33      |   |
| rs6734118   | 2   | 37559355  | C/A    | P    | -0.018   | 0.0079 | -0.0068  | 0.0066 | -0.011   | 0.026   | 13         | 0.28      |   |
| rs77489951  | 2   | 38750287  | C/T    | P    | -0.0018  | 0.029  | -0.0073  | 0.025  | -0.005   | 0.79    | 0          | 0.89      |   |
| rs1396141   | 2   | 41673745  | C/T    | GG   | -0.022   | 0.0074 | -0.017   | 0.0061 | -0.019   | 5.4e-05 | 0          | 0.65      |   |
| rs7580766   | 2   | 42939351  | A/G    | GG   | -0.014   | 0.0069 | -0.021   | 0.0057 | -0.018   | 3.9e-05 | 0          | 0.44      |   |
| rs4596023   | 2   | 48955683  | A/G    | P    | -0.0032  | 0.0077 | -0.0068  | 0.0064 | -0.0053  | 0.28    | 0          | 0.71      |   |
| rs10174398  | 2   | 51195601  | T/C    | P    | 0.0096   | 0.0082 | 0.0092   | 0.0068 | 0.0093   | 0.074   | 0          | 0.97      |   |
| rs10208649  | 2   | 54161363  | T/C    | P    | 0.017    | 0.014  | 0.0077   | 0.012  | 0.011    | 0.21    | 0          | 0.63      |   |
| rs929641    | 2   | 58792377  | A/G    | P    | 0.02     | 0.0069 | 0.027    | 0.0058 | 0.024    | 3.7e-08 | 0          | 0.4       |   |
| rs13011109  | 2   | 58857419  | G/C    | P    | 0.025    | 0.007  | 0.014    | 0.0058 | 0.019    | 3.1e-05 | 34         | 0.22      |   |
| rs4671328   | 2   | 58935282  | T/C    | P    | 0.03     | 0.0068 | 0.027    | 0.0057 | 0.028    | 1.1e-10 | 0          | 0.72      |   |
| rs1016287   | 2   | 59305625  | T/C    | P    | 0.022    | 0.0076 | 0.014    | 0.0063 | 0.017    | 0.00033 | 0          | 0.45      |   |
| rs11688816  | 2   | 63053048  | G/A    | P    | 0.016    | 0.0068 | 0.0046   | 0.0057 | 0.0093   | 0.034   | 39         | 0.2       |   |
| rs17016673  | 2   | 79497779  | G/G    | P    | -0.012   | 0.01   | -0.036   | 0.0087 | -0.026   | 8e-05   | 66         | 0.086     |   |
| rs4851287   | 2   | 100915772 | A/G    | P    | 0.01     | 0.0073 | 0.0073   | 0.0061 | 0.0084   | 0.073   | 0          | 0.78      |   |
| rs1451533   | 2   | 105466005 | G/A    | P    | -0.023   | 0.0076 | -0.0061  | 0.0063 | -0.013   | 0.0069  | 67         | 0.081     |   |
| rs4988235   | 2   | 136608646 | G/A    | P    | -0.025   | 0.0069 | -0.01    | 0.0058 | -0.016   | 0.00022 | 66         | 0.087     |   |
| rs12617004  | 2   | 142615136 | G/C    | P    | 0.0029   | 0.008  | -0.00081 | 0.0067 | 0.00072  | 0.89    | 0          | 0.72      |   |
| rs2890652   | 2   | 142959931 | T/C    | P    | -0.011   | 0.0095 | -0.023   | 0.0079 | -0.018   | 0.0026  | 0          | 0.34      |   |
| rs6710871   | 2   | 143960593 | G/A    | GG   | -0.012   | 0.0095 | -0.031   | 0.008  | -0.023   | 0.00016 | 53         | 0.14      |   |
| rs1460676   | 2   | 164567689 | T/C    | P    | -0.02    | 0.0089 | -0.011   | 0.0075 | -0.014   | 0.012   | 0          | 0.42      |   |
| rs3769885   | 2   | 165592390 | G/A    | P    | -0.012   | 0.0068 | -0.00064 | 0.0056 | -0.0054  | 0.21    | 43         | 0.19      |   |
| rs2390669   | 2   | 169091942 | A/C    | P    | -0.00044 | 0.0096 | -0.0092  | 0.008  | -0.0056  | 0.36    | 0          | 0.48      |   |
| rs6433857   | 2   | 181517996 | C/T    | P    | -0.013   | 0.0071 | 0.016    | 0.0059 | 0.0042   | 0.35    | 90         | 0.0012    |   |
| rs11679338  | 2   | 181606895 | C/T    | P    | -0.022   | 0.0072 | -0.021   | 0.0061 | -0.022   | 3.3e-06 | 0          | 0.97      |   |
| rs17406900  | 2   | 203784202 | A/G    | P    | -0.0025  | 0.0069 | -0.0048  | 0.0057 | -0.0039  | 0.38    | 0          | 0.79      |   |
| rs7569376   | 2   | 205385322 | T/C    | P    | -0.00087 | 0.008  | 0.016    | 0.0067 | 0.0088   | 0.087   | 59         | 0.12      |   |
| rs972540    | 2   | 207244783 | A/G    | P    | -0.013   | 0.0078 | -0.02    | 0.0065 | -0.017   | 0.00055 | 0          | 0.5       |   |
| rs17203016  | 2   | 208255518 | A/G    | P    | -0.02    | 0.0092 | -0.014   | 0.0076 | -0.016   | 0.0053  | 0          | 0.63      |   |
| rs10804189  | 2   | 211988980 | A/G    | P    | 0.0055   | 0.0075 | 0.019    | 0.0063 | 0.013    | 0.0058  | 45         | 0.18      |   |
| rs6435678   | 2   | 212710468 | G/C    | P    | -1.6e-05 | 0.011  | -0.0053  | 0.0089 | -0.0032  | 0.64    | 0          | 0.7       |   |
| rs7599312   | 2   | 213413231 | G/A    | P    | 0.022    | 0.0081 | 0.021    | 0.0068 | 0.021    | 4.1e-05 | 0          | 0.91      |   |
| rs492400    | 2   | 219349752 | C/T    | P    | 0.014    | 0.007  | 0.0077   | 0.0058 | 0.01     | 0.021   | 0          | 0.47      |   |
| rs4072096   | 2   | 227036603 | A/C    | P    | -0.014   | 0.0067 | -0.013   | 0.0057 | -0.014   | 0.0017  | 0          | 0.92      |   |
| rs7601000   | 2   | 242610773 | T/A    | P    | 0.013    | 0.0099 | -0.0031  | 0.0083 | 0.0036   | 0.57    | 37         | 0.21      |   |
| rs2574704   | 3   | 11655381  | T/C    | P    | 0.0002   | 0.0071 | -0.011   | 0.0059 | -0.0063  | 0.17    | 29         | 0.24      |   |
| rs1801282   | 3   | 12393125  | C/G    | P    | -0.021   | 0.011  | -0.023   | 0.009  | -0.022   | 0.0014  | 0          | 0.89      |   |
| rs9845966   | 3   | 13433158  | T/G    | P    | 0.0028   | 0.007  | 0.0082   | 0.0059 | 0.006    | 0.18    | 0          | 0.56      |   |
| rs4857968   | 3   | 20714580  | G/A    | GG   | 0.029    | 0.0079 | 0.024    | 0.0066 | 0.026    | 3.5e-07 | 0          | 0.63      |   |
| rs6804842   | 3   | 25106437  | A/G    | P    | -0.0049  | 0.0069 | -0.021   | 0.0058 | -0.014   | 0.0012  | 68         | 0.076     |   |
| rs754635    | 3   | 42305131  | C/G    | P    | -0.031   | 0.01   | -0.037   | 0.0084 | -0.035   | 7.8e-08 | 0          | 0.62      |   |
| rs56084453  | 3   | 44762830  | A/G    | P    | 0.026    | 0.0087 | 0.014    | 0.0072 | 0.019    | 0.00065 | 17         | 0.27      |   |
| rs3732530   | 3   | 47618953  | C/A    | P    | -0.0002  | 0.0072 | 0.0073   | 0.006  | 0.0042   | 0.36    | 0          | 0.42      |   |
| rs2230590   | 3   | 49936102  | T/C    | P    | -0.031   | 0.0071 | -0.029   | 0.006  | -0.03    | 6.9e-11 | 0          | 0.8       |   |
| rs13100173  | 3   | 50332697  | G/A    | P    | -0.026   | 0.0082 | -0.016   | 0.0068 | -0.02    | 0.00013 | 0          | 0.38      |   |

| SNP         | Chr | Pos       | Allele | Type | M Eff   | M SE   | F Eff   | F SE   | Meta Eff | Meta P  | Meta I <sup>2</sup> | Meta Het. | P |
|-------------|-----|-----------|--------|------|---------|--------|---------|--------|----------|---------|---------------------|-----------|---|
| rs6794880   | 3   | 84451512  | G/A    | P    | -0.02   | 0.0098 | -0.0072 | 0.0082 | -0.013   | 0.046   | 3                   | 0.31      |   |
| rs9852859   | 3   | 85842341  | T/C    | P    | -0.019  | 0.0088 | -0.021  | 0.0073 | -0.02    | 0.00033 | 0                   | 0.83      |   |
| rs12495178  | 3   | 85886077  | T/C    | P    | 0.026   | 0.0071 | 0.019   | 0.0059 | 0.022    | 1.1e-06 | 0                   | 0.47      |   |
| rs7653652   | 3   | 88189341  | T/C    | P    | 0.002   | 0.0094 | -0.012  | 0.0078 | -0.0064  | 0.29    | 26                  | 0.25      |   |
| rs2173039   | 3   | 89142175  | G/C    | P    | -0.0092 | 0.0078 | -0.005  | 0.0065 | -0.0067  | 0.18    | 0                   | 0.68      |   |
| rs1436351   | 3   | 104617973 | G/T    | GG   | -0.012  | 0.0077 | -0.02   | 0.0064 | -0.017   | 0.00066 | 0                   | 0.46      |   |
| rs7640424   | 3   | 107820063 | C/T    | P    | 0.012   | 0.0079 | 0.0069  | 0.0066 | 0.0089   | 0.078   | 0                   | 0.63      |   |
| rs2868975   | 3   | 116935323 | G/A    | P    | 0.0073  | 0.0087 | 0.022   | 0.0073 | 0.016    | 0.0041  | 42                  | 0.19      |   |
| rs1542829   | 3   | 130137471 | G/A    | P    | 0.0092  | 0.013  | -0.0067 | 0.011  | -0.00018 | 0.98    | 0                   | 0.34      |   |
| rs876424    | 3   | 131637676 | T/G    | P    | -0.02   | 0.0071 | -0.012  | 0.0059 | -0.015   | 0.00075 | 0                   | 0.39      |   |
| rs7621025   | 3   | 136272246 | T/C    | P    | -0.02   | 0.0078 | -0.0077 | 0.0065 | -0.013   | 0.011   | 30                  | 0.23      |   |
| rs1052618   | 3   | 136574501 | A/G    | P    | -0.021  | 0.0074 | -0.011  | 0.0062 | -0.015   | 0.0015  | 0                   | 0.32      |   |
| rs1720825   | 3   | 138180803 | A/G    | P    | 0.027   | 0.009  | 0.016   | 0.0075 | 0.02     | 0.00035 | 0                   | 0.38      |   |
| rs16851483  | 3   | 141275436 | G/T    | P    | -0.015  | 0.013  | -0.014  | 0.01   | -0.014   | 0.079   | 0                   | 0.96      |   |
| rs9438      | 3   | 154018887 | G/C    | P    | -0.012  | 0.0069 | -0.013  | 0.0058 | -0.013   | 0.0038  | 0                   | 0.87      |   |
| rs2649734   | 3   | 157347640 | G/A    | P    | 0.0099  | 0.007  | 0.008   | 0.0059 | 0.0088   | 0.052   | 0                   | 0.83      |   |
| rs13069244  | 3   | 180441172 | G/A    | P    | -0.0026 | 0.014  | -0.012  | 0.012  | -0.0082  | 0.35    | 0                   | 0.59      |   |
| rs11546878  | 3   | 183976103 | C/T    | P    | 0.0019  | 0.0094 | 0.0039  | 0.0078 | 0.0031   | 0.61    | 0                   | 0.87      |   |
| rs2178403   | 3   | 184039666 | A/G    | P    | 0.0063  | 0.0086 | 0.021   | 0.0072 | 0.015    | 0.0067  | 42                  | 0.19      |   |
| rs4686392   | 3   | 185524081 | A/G    | P    | 0.012   | 0.0075 | -0.0025 | 0.0062 | 0.0036   | 0.45    | 57                  | 0.13      |   |
| rs9816226   | 3   | 185834499 | A/T    | P    | -0.059  | 0.009  | -0.026  | 0.0076 | -0.039   | 1.3e-11 | 87                  | 0.0047    |   |
| rs34811474  | 4   | 25408838  | G/A    | P    | 0.025   | 0.0087 | 0.044   | 0.0072 | 0.036    | 5e-11   | 65                  | 0.091     |   |
| rs16992647  | 4   | 36813105  | C/T    | P    | 0.02    | 0.009  | 0.01    | 0.0076 | 0.014    | 0.013   | 0                   | 0.41      |   |
| rs4833079   | 4   | 38654681  | T/C    | GG   | 0.019   | 0.0073 | 0.023   | 0.0061 | 0.021    | 4.4e-06 | 0                   | 0.6       |   |
| rs12641981  | 4   | 45179883  | C/T    | P    | -0.03   | 0.0069 | -0.029  | 0.0058 | -0.029   | 3.4e-11 | 0                   | 0.93      |   |
| rs17001654  | 4   | 77129568  | C/P    | P    | 0.0027  | 0.0096 | -0.013  | 0.0081 | -0.0065  | 0.29    | 35                  | 0.22      |   |
| rs13107325  | 4   | 103188709 | C/T    | P    | -0.049  | 0.014  | -0.062  | 0.012  | -0.057   | 1.3e-10 | 0                   | 0.47      |   |
| rs4834272   | 4   | 113313986 | T/C    | P    | -0.016  | 0.0072 | -0.0042 | 0.006  | -0.0092  | 0.046   | 40                  | 0.2       |   |
| rs3749591   | 4   | 120214030 | T/G    | P    | -0.01   | 0.0073 | -0.017  | 0.006  | -0.014   | 0.0027  | 0                   | 0.5       |   |
| rs10019997  | 4   | 137048599 | C/T    | GG   | -0.023  | 0.0069 | -0.019  | 0.0058 | -0.021   | 2.2e-06 | 0                   | 0.65      |   |
| rs11727676  | 4   | 145659064 | T/A    | P    | 0.033   | 0.012  | 0.0087  | 0.01   | 0.018    | 0.019   | 55                  | 0.13      |   |
| rs4865796   | 5   | 53272664  | G/A    | P    | 0.017   | 0.0076 | 0.012   | 0.0064 | 0.014    | 0.0052  | 0                   | 0.62      |   |
| rs7720894   | 5   | 60733933  | G/C    | P    | 0.0028  | 0.0069 | 0.0082  | 0.0057 | 0.006    | 0.18    | 0                   | 0.54      |   |
| rs1503526   | 5   | 63020706  | T/C    | P    | -0.013  | 0.0069 | -0.016  | 0.0058 | -0.015   | 0.0008  | 0                   | 0.79      |   |
| rs1035491   | 5   | 63962177  | A/G    | P    | -0.0058 | 0.0073 | 0.0063  | 0.0061 | 0.0013   | 0.78    | 38                  | 0.2       |   |
| rs3811987   | 5   | 74324548  | A/G    | P    | 0.017   | 0.0075 | 0.011   | 0.0062 | 0.014    | 0.0046  | 0                   | 0.59      |   |
| rs6893216   | 5   | 74442964  | T/C    | P    | 0.022   | 0.01   | 0.0097  | 0.0086 | 0.015    | 0.025   | 0                   | 0.37      |   |
| rs2307111   | 5   | 75003678  | T/C    | P    | 0.04    | 0.0069 | 0.024   | 0.0058 | 0.03     | 8e-12   | 69                  | 0.07      |   |
| rs6870983   | 5   | 87697533  | C/T    | P    | 0.014   | 0.0082 | 0.029   | 0.0069 | 0.023    | 1.6e-05 | 52                  | 0.15      |   |
| rs16903285  | 5   | 87978252  | T/C    | P    | -0.029  | 0.0093 | -0.022  | 0.0078 | -0.025   | 2.5e-05 | 0                   | 0.6       |   |
| rs6234      | 5   | 95728974  | G/C    | P    | -0.018  | 0.0077 | -0.012  | 0.0064 | -0.015   | 0.0028  | 0                   | 0.53      |   |
| rs261967    | 5   | 95850250  | A/C    | P    | -0.018  | 0.0068 | -0.019  | 0.0057 | -0.019   | 1.8e-05 | 0                   | 0.92      |   |
| rs10062657  | 5   | 95867908  | C/A    | P    | 0.023   | 0.01   | 0.023   | 0.0085 | 0.023    | 0.00051 | 0                   | 0.98      |   |
| rs30187     | 5   | 96124330  | T/C    | P    | -0.02   | 0.007  | -0.012  | 0.0059 | -0.015   | 0.00081 | 0                   | 0.37      |   |
| rs40067     | 5   | 107439012 | G/A    | P    | 0.019   | 0.0088 | 0.015   | 0.0074 | 0.016    | 0.0039  | 0                   | 0.72      |   |
| rs1045706   | 5   | 108714298 | T/C    | P    | -0.0066 | 0.0071 | -0.016  | 0.0059 | -0.012   | 0.006   | 14                  | 0.28      |   |
| rs459552    | 5   | 112176756 | T/A    | P    | 0.012   | 0.0083 | -0.0046 | 0.007  | 0.0021   | 0.7     | 56                  | 0.13      |   |
| rs4308481   | 5   | 122652106 | C/T    | P    | 0.011   | 0.0069 | 0.024   | 0.0058 | 0.019    | 2.9e-05 | 50                  | 0.16      |   |
| rs4357030   | 5   | 124316031 | C/T    | P    | -0.0063 | 0.0079 | -0.0024 | 0.0067 | -0.004   | 0.43    | 0                   | 0.7       |   |
| rs4836133   | 5   | 124332103 | C/A    | P    | -0.012  | 0.0069 | -0.013  | 0.0057 | -0.012   | 0.0053  | 0                   | 0.91      |   |
| rs329120    | 5   | 133861756 | C/T    | P    | 0.0093  | 0.0069 | 0.012   | 0.0058 | 0.011    | 0.016   | 0                   | 0.81      |   |
| rs13174863  | 5   | 139080745 | A/G    | P    | -0.0039 | 0.011  | -0.03   | 0.0095 | -0.019   | 0.0081  | 68                  | 0.078     |   |
| rs815610    | 5   | 153517178 | C/G    | P    | 0.015   | 0.007  | 0.023   | 0.0059 | 0.02     | 9.6e-06 | 0                   | 0.39      |   |
| rs7730898   | 5   | 170459675 | G/A    | GG   | -0.011  | 0.0079 | -0.029  | 0.0066 | -0.022   | 1.6e-05 | 68                  | 0.078     |   |
| rs3849724   | 5   | 173290977 | G/T    | P    | 0.0076  | 0.007  | 0.011   | 0.0058 | 0.0094   | 0.035   | 0                   | 0.74      |   |
| rs7715356   | 5   | 179129492 | A/G    | P    | -0.009  | 0.0074 | 0.0015  | 0.0062 | -0.0028  | 0.55    | 17                  | 0.27      |   |
| rs2228210   | 6   | 12122174  | A/G    | P    | 0.017   | 0.0072 | 0.0053  | 0.006  | 0.01     | 0.027   | 38                  | 0.2       |   |
| rs2206734   | 6   | 20694884  | C/T    | P    | 0.0057  | 0.0085 | 0.016   | 0.0071 | 0.012    | 0.033   | 0                   | 0.36      |   |
| rs183975233 | 6   | 32437160  | T/A    | P    | 0.0013  | 0.0073 | -0.001  | 0.0061 | -6.1e-05 | 0.99    | 0                   | 0.81      |   |
| rs943466    | 6   | 33731787  | G/A    | P    | 0.015   | 0.0082 | 0.012   | 0.0068 | 0.013    | 0.014   | 0                   | 0.76      |   |
| rs10947487  | 6   | 34189612  | A/G    | P    | 0.026   | 0.015  | -0.008  | 0.012  | 0.0058   | 0.53    | 69                  | 0.073     |   |
| rs206936    | 6   | 34302869  | A/G    | P    | -0.022  | 0.008  | -0.02   | 0.0067 | -0.021   | 4.8e-05 | 0                   | 0.89      |   |
| rs7757419   | 6   | 34439569  | A/T    | P    | -0.0043 | 0.009  | -0.029  | 0.0075 | -0.019   | 0.00099 | 78                  | 0.033     |   |
| rs41312309  | 6   | 34498328  | C/T    | P    | -0.0021 | 0.014  | -0.021  | 0.012  | -0.013   | 0.15    | 4                   | 0.31      |   |
| rs6457796   | 6   | 34828553  | T/C    | P    | -0.014  | 0.0076 | -0.022  | 0.0064 | -0.019   | 9.7e-05 | 0                   | 0.43      |   |
| rs2033529   | 6   | 40348653  | A/G    | P    | -0.019  | 0.0077 | -0.014  | 0.0065 | -0.016   | 0.00099 | 0                   | 0.61      |   |
| rs78648104  | 6   | 50683009  | T/C    | P    | 0.026   | 0.012  | 0.025   | 0.01   | 0.026    | 0.00077 | 0                   | 0.95      |   |
| rs2206277   | 6   | 50798526  | C/T    | P    | -0.028  | 0.0086 | -0.031  | 0.0072 | -0.03    | 5.1e-08 | 0                   | 0.8       |   |
| rs12199003  | 6   | 55196587  | C/T    | P    | 0.00023 | 0.0068 | -0.0056 | 0.0058 | -0.0032  | 0.47    | 0                   | 0.51      |   |
| rs513357    | 6   | 69558698  | A/G    | G    | 0.036   | 0.01   | 0.039   | 0.0087 | 0.038    | 1.3e-08 | 0                   | 0.84      |   |
| rs947612    | 6   | 73738661  | G/A    | GG   | 0.028   | 0.0078 | 0.026   | 0.0065 | 0.027    | 7.9e-08 | 0                   | 0.91      |   |
| rs17057164  | 6   | 97410536  | T/C    | P    | 0.0033  | 0.0092 | -0.0014 | 0.0077 | 0.00054  | 0.93    | 0                   | 0.7       |   |
| rs4498364   | 6   | 97613773  | C/T    | P    | 0.026   | 0.0074 | 0.0097  | 0.0062 | 0.016    | 0.00062 | 64                  | 0.098     |   |
| rs901630    | 6   | 98539519  | C/T    | GG   | 0.017   | 0.007  | 0.017   | 0.0058 | 0.017    | 0.00014 | 0                   | 0.94      |   |
| rs9400239   | 6   | 108977663 | T/C    | P    | -0.025  | 0.0074 | -0.021  | 0.0062 | -0.023   | 1.3e-06 | 0                   | 0.73      |   |
| rs2357760   | 6   | 120213880 | G/A    | P    | -0.0054 | 0.0072 | -0.012  | 0.006  | -0.0092  | 0.046   | 0                   | 0.49      |   |
| rs6569648   | 6   | 130349119 | C/T    | GG   | 0.022   | 0.0084 | 0.0099  | 0.0071 | 0.015    | 0.00055 | 20                  | 0.26      |   |
| rs13201877  | 6   | 137675541 | A/G    | P    | -0.018  | 0.01   | 0.0016  | 0.0087 | -0.0064  | 0.33    | 53                  | 0.15      |   |
| rs2185027   | 6   | 153381622 | A/C    | P    | -0.0094 | 0.0073 | -0.02   | 0.0061 | -0.016   | 0.00074 | 24                  | 0.25      |   |
| rs487152    | 6   | 160774486 | C/A    | P    | -0.022  | 0.0068 | -0.022  | 0.0057 | -0.022   | 3.3e-07 | 0                   | 1         |   |
| rs13191362  | 6   | 163033350 | A/G    | P    | 0.028   | 0.011  | 0.014   | 0.0091 | 0.019    | 0.0061  | 0                   | 0.33      |   |
| rs9364687   | 6   | 163817911 | G/T    | GG   | 0.00075 | 0.007  | 0.025   | 0.0059 | 0.015    | 0.00091 | 86                  | 0.0082    |   |
| rs1830074   | 7   | 6718674   | T/C    | P    | -0.0014 | 0.0077 | -0.0095 | 0.0065 | -0.0061  | 0.22    | 0                   | 0.42      |   |
| rs10261878  | 7   | 25950545  | A/C    | P    | -0.012  | 0.013  | -0.021  | 0.011  | -0.017   | 0.04    | 0                   | 0.61      |   |
| rs215607    | 7   | 32338337  | G/A    | P    | 0.031   | 0.0081 | 0.021   | 0.0068 | 0.025    | 1.2e-06 | 0                   | 0.36      |   |
| rs10269783  | 7   | 49616203  | G/A    | P    | -0.024  | 0.007  | -0.0048 | 0.0058 | -0.013   | 0.0042  | 78                  | 0.032     |   |
| rs11765748  | 7   | 50615616  | T/A    | P    | 0.012   | 0.0068 | 0.013   | 0.0057 | 0.013    | 0.0035  | 0                   | 0.89      |   |
| rs6947395   | 7   | 69406661  | A/T    | P    | -0.0088 | 0.009  | -0.019  | 0.0076 | -0.015   | 0.012   | 0                   | 0.4       |   |
| rs1949804   | 7   | 69768826  | T/G    | P    | -0.0013 | 0.015  | -0.042  | 0.013  | -0.025   | 0.01    | 77                  | 0.038     |   |
| rs38314     | 7   | 70067315  | G/A    | P    | 0.0017  | 0.0069 | 0.0038  | 0.0058 | 0.003    | 0.5     | 0                   | 0.81      |   |
| rs1167827   | 7   | 75163169  | A/G    | P    | -0.018  | 0.0073 | -0.016  | 0.0061 | -0.017   | 0.00034 | 0                   | 0.77      |   |
| rs7804790   | 7   | 76568075  | C/T    | P    | 0.029   | 0.0099 | 0.014   | 0.0084 | 0.02     | 0.0016  | 30                  | 0.23      |   |
| rs3930017   | 7   | 76720582  | A/G    | P    | -0.0046 | 0.0074 | 0.0011  | 0.0061 | -0.0012  | 0.79    | 0                   | 0.55      |   |
| rs3779273   | 7   | 77828940  | G/A    | P    | 0.011   | 0.0069 | 0.01    | 0.0058 | 0.01     | 0.018   | 0</                 |           |   |

| SNP         | Chr | Pos       | Allele | Type | M Eff   | M SE   | F Eff    | F SE   | Meta Eff | Meta P  | Meta I <sup>2</sup> | Meta Het. | P |
|-------------|-----|-----------|--------|------|---------|--------|----------|--------|----------|---------|---------------------|-----------|---|
| rs17405819  | 8   | 76806584  | T/C    | P    | 0.015   | 0.0074 | 0.038    | 0.0062 | 0.028    | 2.1e-09 | 82                  | 0.017     |   |
| rs1051920   | 8   | 81438420  | C/T    | P    | 0.016   | 0.0078 | 0.019    | 0.0065 | 0.018    | 0.00033 | 0                   | 0.76      |   |
| rs733594    | 8   | 85077686  | C/T    | P    | -0.03   | 0.0076 | -0.0098  | 0.0063 | -0.018   | 0.00024 | 75                  | 0.045     |   |
| rs4366055   | 8   | 95507328  | A/C    | P    | 0.027   | 0.0076 | 0.0024   | 0.0064 | 0.013    | 0.01    | 84                  | 0.013     |   |
| rs3134353   | 8   | 101947453 | A/T    | P    | -0.012  | 0.007  | -0.01    | 0.0058 | -0.011   | 0.016   | 0                   | 0.88      |   |
| rs3802177   | 8   | 118185025 | G/A    | P    | -0.012  | 0.0074 | 0.0049   | 0.0062 | -0.0019  | 0.69    | 66                  | 0.084     |   |
| rs12352785  | 9   | 6956850   | A/C    | GG   | 0.0091  | 0.0077 | 0.031    | 0.0064 | 0.022    | 1e-05   | 78                  | 0.031     |   |
| rs4740619   | 9   | 15634326  | T/C    | P    | 0.0055  | 0.0069 | 0.015    | 0.0058 | 0.011    | 0.012   | 12                  | 0.29      |   |
| rs10811661  | 9   | 22134094  | T/C    | P    | -0.0078 | 0.0088 | 0.014    | 0.0073 | 0.0049   | 0.39    | 72                  | 0.06      |   |
| rs1934100   | 9   | 23234308  | A/T    | P    | 0.01    | 0.0076 | 0.004    | 0.0053 | 0.0066   | 0.17    | 0                   | 0.52      |   |
| rs10811901  | 9   | 23356935  | G/A    | P    | -0.0034 | 0.0069 | -0.012   | 0.0058 | -0.0084  | 0.059   | 0                   | 0.35      |   |
| rs10968577  | 9   | 28415512  | C/T    | P    | -0.038  | 0.0074 | -0.021   | 0.0062 | -0.028   | 2.6e-09 | 69                  | 0.074     |   |
| rs11142387  | 9   | 72998332  | A/C    | P    | 0.011   | 0.0068 | 0.00024  | 0.0057 | 0.0046   | 0.29    | 30                  | 0.23      |   |
| rs10868215  | 9   | 87234111  | T/C    | P    | 0.0048  | 0.007  | 0.0091   | 0.0059 | 0.0073   | 0.1     | 0                   | 0.63      |   |
| rs1147199   | 9   | 87275895  | A/G    | P    | 4.8e-05 | 0.0085 | -0.01    | 0.0071 | -0.006   | 0.27    | 0                   | 0.36      |   |
| rs12236219  | 9   | 97062981  | C/T    | P    | 0.014   | 0.013  | 0.022    | 0.011  | 0.019    | 0.028   | 0                   | 0.66      |   |
| rs3932549   | 9   | 97073588  | A/C    | P    | 0.0097  | 0.0073 | 0.0038   | 0.0061 | 0.0062   | 0.19    | 0                   | 0.49      |   |
| rs7855432   | 9   | 100760113 | G/T    | P    | 0.0085  | 0.0083 | 0.0011   | 0.0069 | 0.0041   | 0.44    | 0                   | 0.53      |   |
| rs580809    | 9   | 101518442 | C/T    | P    | -0.0019 | 0.0079 | 0.018    | 0.0066 | 0.0096   | 0.059   | 72                  | 0.058     |   |
| rs7024334   | 9   | 109072075 | T/G    | P    | 0.014   | 0.008  | 0.0094   | 0.0067 | 0.011    | 0.027   | 0                   | 0.65      |   |
| rs6477694   | 9   | 111932342 | C/T    | P    | 0.015   | 0.0071 | 0.015    | 0.0059 | 0.015    | 0.0012  | 0                   | 0.98      |   |
| rs1928295   | 9   | 120378483 | T/C    | P    | 0.0054  | 0.0068 | 0.014    | 0.0057 | 0.011    | 0.015   | 0                   | 0.32      |   |
| rs10760279  | 9   | 126105291 | G/T    | P    | -0.013  | 0.0082 | -0.019   | 0.0069 | -0.017   | 0.0015  | 0                   | 0.54      |   |
| rs1105223   | 9   | 126128211 | T/C    | P    | 0.014   | 0.0079 | 0.0097   | 0.0067 | 0.012    | 0.024   | 0                   | 0.67      |   |
| rs5015933   | 9   | 128137418 | T/C    | P    | 0.0014  | 0.0069 | 0.013    | 0.0058 | 0.0082   | 0.064   | 40                  | 0.2       |   |
| rs2235056   | 9   | 129377235 | C/T    | P    | 0.014   | 0.013  | 0.022    | 0.011  | 0.018    | 0.029   | 0                   | 0.65      |   |
| rs10733682  | 9   | 129460914 | A/G    | P    | 0.018   | 0.0079 | 0.027    | 0.0066 | 0.024    | 3.2e-06 | 0                   | 0.35      |   |
| rs2270204   | 9   | 131042734 | T/G    | P    | -0.031  | 0.0082 | -0.0075  | 0.0069 | -0.017   | 0.0011  | 79                  | 0.028     |   |
| rs2280843   | 9   | 131585069 | A/G    | P    | 0.003   | 0.0079 | -0.00023 | 0.0066 | 0.0011   | 0.83    | 0                   | 0.75      |   |
| rs11257655  | 10  | 12307894  | C/T    | P    | 0.0087  | 0.0082 | 0.015    | 0.0069 | 0.013    | 0.018   | 0                   | 0.54      |   |
| rs1277723   | 10  | 18554623  | G/A    | P    | -0.0063 | 0.0081 | -0.018   | 0.0067 | -0.013   | 0.012   | 13                  | 0.28      |   |
| rs2274741   | 10  | 27303605  | A/T    | P    | -0.0091 | 0.0092 | -0.019   | 0.0077 | -0.015   | 0.011   | 0                   | 0.4       |   |
| rs118067556 | 10  | 63136165  | C/T    | GG   | 0.046   | 0.019  | 0.068    | 0.016  | 0.059    | 2.8e-06 | 0                   | 0.39      |   |
| rs2163188   | 10  | 65314711  | G/C    | P    | -0.019  | 0.0068 | -0.016   | 0.0057 | -0.017   | 8e-05   | 0                   | 0.76      |   |
| rs3088142   | 10  | 76854564  | C/T    | P    | -0.0065 | 0.007  | -0.0076  | 0.0059 | -0.0071  | 0.11    | 0                   | 0.91      |   |
| rs7899106   | 10  | 87410904  | A/G    | P    | -0.039  | 0.016  | -0.039   | 0.014  | -0.039   | 0.0002  | 0                   | 0.98      |   |
| rs7923837   | 10  | 94481917  | G/A    | P    | -0.016  | 0.0071 | -0.013   | 0.006  | -0.014   | 0.0023  | 0                   | 0.76      |   |
| rs12569457  | 10  | 99096676  | C/T    | P    | -0.0037 | 0.023  | -0.0059  | 0.019  | -0.005   | 0.73    | 0                   | 0.94      |   |
| rs11189513  | 10  | 99969568  | A/G    | P    | 0.014   | 0.0073 | 0.028    | 0.0061 | 0.022    | 2.2e-06 | 53                  | 0.14      |   |
| rs17094222  | 10  | 102395440 | T/C    | P    | -0.032  | 0.0087 | -0.021   | 0.0073 | -0.025   | 5.9e-06 | 0                   | 0.34      |   |
| rs2495707   | 10  | 102425949 | A/G    | P    | 0.025   | 0.0082 | 0.02     | 0.007  | 0.022    | 2.8e-05 | 0                   | 0.7       |   |
| rs284860    | 10  | 104572963 | T/C    | P    | -0.0051 | 0.0069 | 0.011    | 0.0058 | 0.0041   | 0.35    | 67                  | 0.08      |   |
| rs11191580  | 10  | 104906211 | T/C    | P    | -0.037  | 0.011  | -0.036   | 0.0094 | -0.036   | 4.9e-07 | 0                   | 0.91      |   |
| rs7903146   | 10  | 114758349 | C/T    | P    | 0.024   | 0.0077 | 0.014    | 0.0065 | 0.018    | 0.00022 | 0.18                | 0.32      |   |
| rs10886017  | 10  | 118672531 | C/A    | P    | -0.019  | 0.0078 | -0.015   | 0.0065 | -0.017   | 0.00073 | 0                   | 0.73      |   |
| rs2257129   | 10  | 122898697 | T/C    | P    | 0.0067  | 0.015  | 0.0041   | 0.013  | 0.0051   | 0.6     | 0                   | 0.9       |   |
| rs1568079   | 10  | 125251751 | T/A    | P    | 0.0066  | 0.0078 | 0.019    | 0.0065 | 0.014    | 0.0048  | 36                  | 0.21      |   |
| rs1561589   | 10  | 126695673 | G/A    | P    | -0.019  | 0.0074 | -0.021   | 0.0062 | -0.02    | 2.7e-05 | 0                   | 0.89      |   |
| rs7126805   | 11  | 828916    | G/A    | P    | -0.0072 | 0.01   | -0.014   | 0.0089 | -0.011   | 0.11    | 0                   | 0.64      |   |
| rs2237892   | 11  | 2839751   | C/T    | P    | -0.029  | 0.017  | -0.028   | 0.014  | -0.028   | 0.009   | 0                   | 0.93      |   |
| rs10840100  | 11  | 8669437   | A/G    | P    | -0.0041 | 0.0071 | -0.014   | 0.0059 | -0.01    | 0.027   | 15                  | 0.28      |   |
| rs7938308   | 11  | 13320533  | C/T    | G    | 0.032   | 0.0077 | 0.027    | 0.0064 | 0.029    | 4.3e-09 | 0                   | 0.57      |   |
| rs7928810   | 11  | 17372443  | C/A    | P    | -0.016  | 0.0072 | -0.002   | 0.006  | -0.0077  | 0.094   | 55                  | 0.14      |   |
| rs80317617  | 11  | 27362257  | T/C    | P    | -0.033  | 0.015  | -0.044   | 0.013  | -0.039   | 5.7e-05 | 0                   | 0.6       |   |
| rs6265      | 11  | 27679916  | C/T    | P    | 0.046   | 0.0085 | 0.038    | 0.0071 | 0.041    | 4.7e-14 | 0                   | 0.49      |   |
| rs4517468   | 11  | 27688286  | A/T    | P    | 0.029   | 0.0072 | 0.045    | 0.0061 | 0.038    | 2.7e-16 | 64                  | 0.094     |   |
| rs3026401   | 11  | 31807524  | C/T    | P    | -0.014  | 0.008  | -0.0024  | 0.0067 | -0.007   | 0.17    | 16                  | 0.28      |   |
| rs652722    | 11  | 31905534  | C/T    | P    | 0.0028  | 0.0076 | 0.0067   | 0.0064 | 0.0051   | 0.29    | 0                   | 0.69      |   |
| rs4755726   | 11  | 43642130  | T/G    | P    | 0.028   | 0.0075 | 0.017    | 0.0063 | 0.021    | 9.3e-06 | 25                  | 0.25      |   |
| rs10742752  | 11  | 45438374  | T/C    | GG   | -0.011  | 0.007  | -0.02    | 0.0059 | -0.016   | 0.00032 | 3.8                 | 0.31      |   |
| rs3816605   | 11  | 47857253  | T/C    | P    | 0.017   | 0.0068 | 0.021    | 0.0057 | 0.019    | 1e-05   | 0                   | 0.69      |   |
| rs506338    | 11  | 64440920  | T/C    | P    | -0.011  | 0.0073 | -0.004   | 0.0062 | -0.0068  | 0.15    | 0                   | 0.48      |   |
| rs12273892  | 11  | 64480930  | A/T    | P    | 0.025   | 0.01   | 0.012    | 0.0084 | 0.017    | 0.0073  | 8.7                 | 0.3       |   |
| rs11607976  | 11  | 69279111  | C/T    | P    | 0.012   | 0.0085 | 0.0011   | 0.0071 | 0.0055   | 0.31    | 0                   | 0.33      |   |
| rs7123876   | 11  | 72444583  | T/C    | P    | -0.0093 | 0.0081 | -0.0091  | 0.0068 | -0.0092  | 0.077   | 0                   | 0.99      |   |
| rs10899469  | 11  | 78018313  | T/C    | P    | 0.0037  | 0.0088 | 0.0034   | 0.0074 | 0.0035   | 0.54    | 0                   | 0.98      |   |
| rs1816537   | 11  | 112968651 | A/C    | P    | -0.015  | 0.0069 | -0.017   | 0.0058 | -0.016   | 0.00028 | 0                   | 0.87      |   |
| rs12286929  | 11  | 115022404 | A/G    | P    | -0.024  | 0.007  | -0.016   | 0.0058 | -0.019   | 1.5e-05 | 0                   | 0.4       |   |
| rs15818     | 11  | 118952173 | A/G    | P    | 0.0036  | 0.0071 | -0.013   | 0.006  | -0.006   | 0.19    | 67                  | 0.08      |   |
| rs11611246  | 12  | 939480    | G/T    | P    | -0.022  | 0.0083 | -0.03    | 0.0069 | -0.027   | 3.3e-07 | 0                   | 0.44      |   |
| rs12828016  | 12  | 998365    | G/T    | P    | 0.011   | 0.0069 | 0.014    | 0.0058 | 0.013    | 0.004   | 0                   | 0.69      |   |
| rs10772983  | 12  | 17141582  | C/T    | P    | 0.012   | 0.0068 | 0.013    | 0.0057 | 0.013    | 0.0034  | 0                   | 0.92      |   |
| rs7970953   | 12  | 24075508  | G/A    | P    | -0.016  | 0.0073 | -0.012   | 0.0061 | -0.014   | 0.0033  | 0                   | 0.65      |   |
| rs11170468  | 12  | 39430048  | A/C    | GG   | 0.016   | 0.0084 | 0.0095   | 0.007  | 0.012    | 0.026   | 0                   | 0.58      |   |
| rs1405552   | 12  | 41746673  | G/A    | P    | 0.015   | 0.0068 | 0.019    | 0.0057 | 0.017    | 0.0001  | 0                   | 0.66      |   |
| rs11181001  | 12  | 41948196  | A/G    | P    | 0.023   | 0.007  | 0.011    | 0.0059 | 0.016    | 0.00036 | 43                  | 0.18      |   |
| rs1126930   | 12  | 49399132  | G/C    | P    | -0.013  | 0.021  | -0.0096  | 0.017  | -0.011   | 0.41    | 0                   | 0.91      |   |
| rs7132908   | 12  | 50263148  | G/A    | P    | -0.022  | 0.0072 | -0.02    | 0.0061 | -0.02    | 1.2e-05 | 0                   | 0.84      |   |
| rs77511173  | 12  | 53883537  | T/C    | P    | 0.021   | 0.02   | 0.011    | 0.017  | 0.015    | 0.23    | 0                   | 0.69      |   |
| rs1819844   | 12  | 68205604  | A/G    | GG   | 0.023   | 0.0088 | 0.025    | 0.0074 | 0.024    | 2e-05   | 0                   | 0.91      |   |
| rs61754230  | 12  | 72179446  | C/T    | P    | -0.015  | 0.037  | -0.023   | 0.031  | -0.02    | 0.4     | 0                   | 0.85      |   |
| rs10777237  | 12  | 90643524  | T/C    | P    | 0.015   | 0.0075 | 0.0066   | 0.0063 | 0.01     | 0.035   | 0                   | 0.38      |   |
| rs1966714   | 12  | 90671038  | A/G    | P    | 0.019   | 0.0083 | -0.0085  | 0.0069 | 0.0026   | 0.63    | 84                  | 0.012     |   |
| rs11105839  | 12  | 91237920  | T/A    | P    | 0.0026  | 0.007  | 0.019    | 0.0058 | 0.012    | 0.006   | 70                  | 0.07      |   |
| rs2372716   | 12  | 99573426  | C/T    | GG   | 0.023   | 0.0086 | 0.017    | 0.0072 | 0.019    | 0.00051 | 0                   | 0.59      |   |
| rs3184504   | 12  | 111884608 | T/C    | P    | -0.01   | 0.0071 | -0.023   | 0.0059 | -0.018   | 0.0001  | 50                  | 0.16      |   |
| rs2301712   | 12  | 112641377 | T/G    | P    | 0.032   | 0.016  | -0.0018  | 0.013  | 0.012    | 0.25    | 63                  | 0.1       |   |
| rs729062    | 12  | 113687859 | A/G    | P    | -0.016  | 0.014  | -0.0052  | 0.011  | -0.0096  | 0.27    | 0                   | 0.55      |   |
| rs1169081   | 12  | 122405912 | G/T    | P    | 0.0088  | 0.0074 | 0.013    | 0.0062 | 0.011    | 0.016   | 0                   | 0.64      |   |
| rs7978353   | 12  | 122617989 | A/G    | P    | -0.0035 | 0.0071 | 0.0099   | 0.006  | 0.0044   | 0.34    | 52                  | 0.15      |   |
| rs11057405  | 12  | 122781897 | G/A    | P    | 0.024   | 0.014  | 0.027    | 0.011  | 0.026    | 0.0034  | 0                   | 0.86      |   |
| rs4319547   | 12  | 123079035 | A/G    | P    | -0.0096 | 0.0078 | -0.013   | 0.0065 | -0.011   | 0.024   | 0                   | 0.77      |   |
| rs34149579  | 12  | 123345509 | G/T    | P    | -0.0022 | 0.019  | 0.021    | 0.016  | 0.012    | 0.33    | 0                   | 0.35      |   |
| rs11247009  | 12  | 132701184 | G/A    | P    | -0.01   |        |          |        |          |         |                     |           |   |

| SNP         | Chr  | Pos       | Allele | Type | M Eff   | M SE   | F Eff    | F SE   | Meta Eff | Meta P  | Meta I <sup>2</sup> | Meta Het. | P |
|-------------|------|-----------|--------|------|---------|--------|----------|--------|----------|---------|---------------------|-----------|---|
| rs12895330  | 14   | 33305343  | G/C    | P    | -0.019  | 0.0068 | -0.029   | 0.0057 | -0.025   | 1.1e-08 | 27                  | 0.24      |   |
| rs7141420   | 14   | 79899454  | C/T    | P    | -0.022  | 0.0067 | -0.015   | 0.0056 | -0.018   | 3.4e-05 | 0                   | 0.47      |   |
| rs10150332  | 14   | 79936964  | T/C    | P    | -0.024  | 0.0085 | -0.031   | 0.0071 | -0.028   | 2.9e-07 | 0                   | 0.5       |   |
| rs3783890   | 14   | 93790276  | T/C    | P    | 0.025   | 0.0086 | 0.011    | 0.0072 | 0.017    | 0.0026  | 35                  | 0.21      |   |
| rs729050    | 14   | 94109502  | G/T    | P    | -0.025  | 0.0075 | -0.022   | 0.0062 | -0.023   | 1.4e-06 | 0                   | 0.73      |   |
| rs7161194   | 14   | 101529005 | A/G    | GG   | 0.0095  | 0.0075 | 0.025    | 0.0063 | 0.019    | 9.9e-05 | 61                  | 0.11      |   |
| rs1131877   | 14   | 103342049 | T/C    | P    | -0.023  | 0.0078 | -0.022   | 0.0065 | -0.023   | 6.4e-06 | 0                   | 0.89      |   |
| rs861539    | 14   | 104165753 | G/A    | P    | 0.0038  | 0.0073 | 0.013    | 0.0061 | 0.0095   | 0.042   | 1.3                 | 0.31      |   |
| rs12440086  | 15   | 27038492  | C/A    | P    | -0.0048 | 0.0068 | -0.017   | 0.0057 | -0.012   | 0.0071  | 44                  | 0.18      |   |
| rs711906    | 15   | 40325691  | C/T    | P    | 0.024   | 0.014  | -0.0089  | 0.011  | 0.0045   | 0.61    | 71                  | 0.064     |   |
| rs1559677   | 15   | 47738063  | A/G    | P    | -0.012  | 0.007  | -0.011   | 0.0058 | -0.012   | 0.0091  | 0                   | 0.91      |   |
| rs3736485   | 15   | 51748610  | A/G    | P    | 0.0029  | 0.007  | 0.0029   | 0.0058 | 0.0029   | 0.52    | 0                   | 1         |   |
| rs2593235   | 15   | 57541201  | G/A    | P    | 0.02    | 0.0069 | 0.0073   | 0.0058 | 0.013    | 0.0043  | 51                  | 0.15      |   |
| rs17303831  | 15   | 62134332  | T/C    | P    | 0.035   | 0.017  | 0.039    | 0.014  | 0.038    | 0.00051 | 0                   | 0.86      |   |
| rs12899850  | 15   | 66051299  | C/T    | GG   | 0.014   | 0.0088 | 0.028    | 0.0074 | 0.022    | 8.1e-05 | 26                  | 0.24      |   |
| rs11071896  | 15   | 66821250  | A/G    | P    | 0.02    | 0.0078 | 0.0044   | 0.0066 | 0.011    | 0.031   | 58                  | 0.12      |   |
| rs4776970   | 15   | 68080886  | A/T    | P    | 0.022   | 0.007  | 0.033    | 0.0058 | 0.029    | 1.5e-10 | 35                  | 0.21      |   |
| rs2277598   | 15   | 73027478  | T/C    | P    | -0.011  | 0.0071 | -0.015   | 0.0059 | -0.014   | 0.0028  | 0                   | 0.66      |   |
| rs12593036  | 15   | 8108652   | A/G    | P    | 0.021   | 0.0075 | 0.011    | 0.0063 | 0.015    | 0.002   | 0                   | 0.32      |   |
| rs7181659   | 15   | 95267483  | A/G    | P    | 0.028   | 0.0068 | 0.048    | 0.0057 | 0.014    | 0.0011  | 85                  | 0.0095    |   |
| rs11865815  | 16   | 387867    | C/T    | P    | 0.0045  | 0.009  | 0.0091   | 0.0076 | 0.0072   | 0.21    | 0                   | 0.7       |   |
| rs758747    | 16   | 3627358   | C/T    | P    | -0.0091 | 0.0082 | -0.01    | 0.0068 | -0.0099  | 0.059   | 0                   | 0.9       |   |
| rs1053874   | 16   | 37077747  | G/A    | P    | -0.0041 | 0.0076 | 0.00016  | 0.0064 | -0.0016  | 0.74    | 0                   | 0.67      |   |
| rs879620    | 16   | 4015729   | C/T    | P    | -0.033  | 0.0088 | -0.021   | 0.0074 | -0.026   | 3e-06   | 8.1                 | 0.3       |   |
| rs1049205   | 16   | 4942099   | C/T    | P    | 0.002   | 0.007  | 0.017    | 0.0059 | 0.011    | 0.019   | 62                  | 0.11      |   |
| rs9302817   | 16   | 6163936   | T/G    | P    | 0.023   | 0.0084 | 0.0038   | 0.0071 | 0.012    | 0.031   | 67                  | 0.083     |   |
| rs1136001   | 16   | 15131974  | G/T    | P    | 0.015   | 0.0073 | 0.0063   | 0.0061 | 0.0098   | 0.035   | 0                   | 0.37      |   |
| rs7190603   | 16   | 19928662  | T/C    | P    | 0.024   | 0.01   | 0.023    | 0.0086 | 0.023    | 0.00049 | 0                   | 0.96      |   |
| rs11074446  | 16   | 20255123  | T/C    | P    | 0.025   | 0.0096 | 0.026    | 0.0081 | 0.026    | 3.6e-05 | 0                   | 0.91      |   |
| rs9652589   | 16   | 20370816  | C/T    | P    | 0.0088  | 0.0069 | 0.025    | 0.0058 | 0.019    | 3e-05   | 70                  | 0.066     |   |
| rs7195386   | 16   | 24578458  | T/C    | P    | 0.0096  | 0.0069 | 0.014    | 0.0057 | 0.012    | 0.005   | 0                   | 0.61      |   |
| rs2008514   | 16   | 28825605  | G/A    | P    | -0.034  | 0.0072 | -0.022   | 0.006  | -0.027   | 4e-09   | 46                  | 0.18      |   |
| rs7204797   | 16   | 29968015  | A/T    | P    | -0.016  | 0.0069 | -0.023   | 0.0058 | -0.02    | 9.3e-06 | 0                   | 0.46      |   |
| rs9925964   | 16   | 31129895  | A/G    | P    | 0.0019  | 0.0074 | 0.03     | 0.0062 | 0.018    | 0.00011 | 88                  | 0.0036    |   |
| rs2080454   | 16   | 49062590  | G/A    | P    | 0.0072  | 0.0071 | 0.014    | 0.006  | 0.011    | 0.015   | 0                   | 0.47      |   |
| rs1564981   | 16   | 50986308  | C/T    | P    | 0.00014 | 0.0068 | -0.0037  | 0.0057 | -0.0021  | 0.63    | 0                   | 0.66      |   |
| rs17795934  | 16   | 51926509  | C/T    | P    | 0.0056  | 0.0074 | 0.0045   | 0.0062 | 0.0049   | 0.3     | 0                   | 0.91      |   |
| rs3213758   | 16   | 53639438  | C/T    | P    | 0.032   | 0.013  | 0.025    | 0.011  | 0.028    | 0.0012  | 0                   | 0.71      |   |
| rs6499640   | 16   | 53769677  | G/A    | P    | -0.028  | 0.007  | -0.027   | 0.0058 | -0.027   | 1.4e-09 | 0                   | 0.93      |   |
| rs55872725  | 16   | 53809123  | C/T    | P    | -0.078  | 0.007  | -0.071   | 0.0059 | -0.074   | 2.8e-60 | 0                   | 0.41      |   |
| rs113191842 | 16   | 53817318  | G/A    | P    | -0.077  | 0.013  | -0.06    | 0.011  | -0.067   | 8.7e-15 | 0                   | 0.34      |   |
| rs7187961   | 16   | 53826034  | T/C    | P    | -0.041  | 0.0091 | -0.045   | 0.0075 | -0.044   | 5.3e-14 | 0                   | 0.71      |   |
| rs2307022   | 16   | 68381978  | A/G    | P    | -0.0075 | 0.0073 | 0.0018   | 0.0061 | -0.0021  | 0.66    | 0                   | 0.33      |   |
| rs889398    | 16   | 69556715  | C/T    | P    | 0.0088  | 0.0071 | 0.024    | 0.0059 | 0.018    | 0.00011 | 61                  | 0.11      |   |
| rs61747555  | 16   | 71885423  | A/G    | P    | 0.027   | 0.0087 | 0.017    | 0.0073 | 0.021    | 0.00018 | 0                   | 0.38      |   |
| rs62051555  | 16   | 72830539  | C/G    | P    | 0.013   | 0.019  | 0.013    | 0.016  | 0.013    | 0.28    | 0                   | 0.99      |   |
| rs756717    | 16   | 72996162  | G/A    | P    | 0.015   | 0.0071 | 0.021    | 0.0059 | 0.019    | 3.8e-05 | 0                   | 0.51      |   |
| rs4788694   | 16   | 73070083  | C/G    | P    | 0.011   | 0.0071 | 0.0054   | 0.0059 | 0.0075   | 0.097   | 0                   | 0.57      |   |
| rs455527    | 16   | 89644001  | T/C    | P    | 0.022   | 0.016  | 0.0089   | 0.013  | 0.014    | 0.17    | 0                   | 0.55      |   |
| rs2281727   | 17   | 2117945   | A/G    | P    | -0.0075 | 0.0071 | 0.0011   | 0.006  | -0.0024  | 0.59    | 0                   | 0.35      |   |
| rs1885987   | 17   | 2203025   | T/G    | P    | 0.0086  | 0.0071 | -0.0057  | 0.0059 | 0.00015  | 0.97    | 58                  | 0.12      |   |
| rs35400274  | 17   | 4803711   | G/A    | P    | -0.021  | 0.01   | -0.011   | 0.0084 | -0.015   | 0.017   | 0                   | 0.45      |   |
| rs3026101   | 17   | 5280440   | T/C    | P    | -0.014  | 0.0073 | -0.026   | 0.0061 | -0.021   | 6.9e-06 | 36                  | 0.21      |   |
| rs4925114   | 17   | 17711270  | A/G    | P    | -0.0048 | 0.0075 | 0.01     | 0.0064 | 0.004    | 0.41    | 57                  | 0.13      |   |
| rs203462    | 17   | 19812541  | T/C    | P    | 0.011   | 0.0071 | 0.00017  | 0.0059 | 0.0048   | 0.29    | 33                  | 0.22      |   |
| rs4986044   | 17   | 21261560  | C/T    | P    | 0.0083  | 0.0088 | 0.011    | 0.0075 | 0.01     | 0.077   | 0                   | 0.8       |   |
| rs17826219  | 17   | 29161845  | G/A    | P    | -0.028  | 0.011  | 0.0016   | 0.009  | -0.011   | 0.12    | 77                  | 0.037     |   |
| rs12150665  | 17   | 34914787  | T/C    | P    | 0.011   | 0.007  | 0.027    | 0.0059 | 0.021    | 4.4e-06 | 70                  | 0.067     |   |
| rs11658063  | 17   | 36103872  | C/G    | P    | -0.0016 | 0.007  | -0.00036 | 0.0059 | -0.00085 | 0.85    | 0                   | 0.9       |   |
| rs11652097  | 17   | 45316717  | C/T    | P    | -0.018  | 0.007  | -0.0092  | 0.0059 | -0.013   | 0.004   | 2.6                 | 0.31      |   |
| rs1808192   | 17   | 45794706  | A/G    | P    | 0.01    | 0.0078 | 0.025    | 0.0065 | 0.019    | 0.00017 | 52                  | 0.15      |   |
| rs6504108   | 17   | 46292923  | C/T    | P    | 0.011   | 0.0075 | 0.012    | 0.0063 | 0.012    | 0.015   | 0                   | 0.89      |   |
| rs7406910   | 17   | 46688256  | T/C    | P    | -0.012  | 0.012  | -0.0045  | 0.0097 | -0.0074  | 0.32    | 0                   | 0.64      |   |
| rs17631394  | 17   | 61646000  | G/A    | P    | 0.019   | 0.008  | 0.0016   | 0.0067 | 0.0088   | 0.087   | 64                  | 0.096     |   |
| rs4790981   | 17   | 65921834  | A/G    | P    | -0.015  | 0.0081 | -0.028   | 0.0068 | -0.023   | 1.5e-05 | 39                  | 0.2       |   |
| rs312750    | 17   | 68343539  | G/A    | P    | -0.0065 | 0.0068 | -0.0049  | 0.0057 | -0.0056  | 0.2     | 0                   | 0.85      |   |
| rs3760128   | 17   | 73886888  | A/G    | P    | -0.024  | 0.0073 | -0.0089  | 0.0062 | -0.015   | 0.0012  | 61                  | 0.11      |   |
| rs4889891   | 17   | 77768654  | C/A    | P    | 0.0086  | 0.0083 | 0.004    | 0.007  | 0.0059   | 0.27    | 0                   | 0.67      |   |
| rs12939549  | 17   | 78611724  | A/G    | P    | 0.024   | 0.0069 | 0.0092   | 0.0058 | 0.015    | 0.0005  | 64                  | 0.094     |   |
| rs1788799   | 18   | 21124945  | C/G    | P    | 0.018   | 0.0074 | 0.023    | 0.0062 | 0.021    | 7.6e-06 | 0                   | 0.56      |   |
| rs1805081   | 18   | 21140432  | T/C    | P    | 0.025   | 0.007  | 0.018    | 0.0059 | 0.021    | 3e-06   | 0                   | 0.45      |   |
| rs11081818  | 18   | 31251088  | G/A    | GG   | -0.015  | 0.0069 | -0.026   | 0.0058 | -0.021   | 1.8e-06 | 29                  | 0.24      |   |
| rs9304204   | 18   | 36896003  | A/G    | P    | -0.0044 | 0.0089 | -0.0066  | 0.0074 | -0.0057  | 0.32    | 0                   | 0.84      |   |
| rs7239883   | 18   | 40147671  | G/A    | P    | 0.0099  | 0.0071 | 0.017    | 0.0059 | 0.014    | 0.0025  | 0                   | 0.47      |   |
| rs1518142   | 18   | 40721490  | G/A    | P    | 0.0062  | 0.0069 | 0.021    | 0.0057 | 0.015    | 0.00053 | 65                  | 0.089     |   |
| rs4129322   | 18   | 50605642  | G/A    | P    | -0.012  | 0.011  | 0.015    | 0.0093 | 0.0038   | 0.59    | 70                  | 0.07      |   |
| rs7243785   | 18   | 52475162  | A/G    | P    | -0.028  | 0.008  | -0.011   | 0.0066 | -0.018   | 0.00047 | 63                  | 0.1       |   |
| rs7243357   | 18   | 56883319  | T/G    | P    | 0.0022  | 0.009  | -0.0018  | 0.0075 | -0.0002  | 0.97    | 0                   | 0.73      |   |
| rs591166    | 18   | 57841589  | T/A    | P    | -0.017  | 0.007  | -0.015   | 0.0058 | -0.016   | 0.00033 | 0                   | 0.89      |   |
| rs12969709  | 18   | 57859563  | C/A    | P    | -0.031  | 0.0079 | -0.054   | 0.0066 | -0.044   | 1.3e-18 | 81                  | 0.022     |   |
| rs9944545   | 18   | 57958244  | C/T    | P    | -0.01   | 0.0077 | -0.04    | 0.0064 | -0.028   | 1.1e-08 | 89                  | 0.0027    |   |
| rs17066842  | 18   | 58040624  | G/A    | P    | 0.045   | 0.017  | 0.067    | 0.014  | 0.058    | 1.4e-07 | 0                   | 0.33      |   |
| rs12454712  | 18   | 60845884  | T/C    | P    | -0.0033 | 0.0083 | -0.021   | 0.007  | -0.014   | 0.01    | 63                  | 0.099     |   |
| rs17710386  | 18   | 63461201  | T/C    | P    | -0.0077 | 0.0077 | -0.0093  | 0.0065 | -0.0086  | 0.081   | 0                   | 0.87      |   |
| rs2396359   | 19   | 1819125   | T/C    | P    | 0.0038  | 0.012  | 0.0066   | 0.01   | 0.0054   | 0.48    | 0                   | 0.86      |   |
| rs11672550  | 19   | 1937193   | C/T    | P    | 0.0064  | 0.0098 | 0.0051   | 0.0083 | 0.0057   | 0.37    | 0                   | 0.92      |   |
| rs45465594  | 19   | 3813906   | A/C    | P    | -0.023  | 0.043  | 0.035    | 0.038  | 0.01     | 0.73    | 2.2                 | 0.31      |   |
| rs8108738   | 19   | 18255359  | G/A    | P    | 0.014   | 0.0075 | 0.0096   | 0.0062 | 0.011    | 0.019   | 0                   | 0.68      |   |
| rs874628    | 19   | 18304700  | A/G    | P    | -0.014  | 0.0089 | -0.008   | 0.0075 | -0.011   | 0.067   | 0                   | 0.6       |   |
| rs17724992  | 19   | 18454825  | A/G    | P    | 0.023   | 0.0096 | -0.007   | 0.0081 | 0.0055   | 0.37    | 82                  | 0.017     |   |
| rs757318    | 19   | 18820308  | C/A    | P    | 0.019   | 0.0086 | 0.0012   | 0.0073 | 0.0085   | 0.13    | 59                  | 0.12      |   |
| rs17751061  | 19   | 19413092  | C/T    | P    | 0.014   | 0.0098 | 0.029    | 0.0083 | 0.022    | 0.00037 | 23                  | 0.25      |   |
| rs17513613  | 19   | 30286822  | T/C    | P    | 0.0013  | 0.0075 | -0.018   | 0.0063 | -0.01    | 0.034   | 75                  | 0.044     |   |
| rs4805566   | 19</ |           |        |      |         |        |          |        |          |         |                     |           |   |

| SNP        | Chr | Pos       | Allele | Type | M Eff   | M SE   | F Eff   | F SE   | Meta Eff | Meta P  | Meta $i^2$ | Meta Het. P |
|------------|-----|-----------|--------|------|---------|--------|---------|--------|----------|---------|------------|-------------|
| rs6050446  | 20  | 25195509  | A/G    | P    | -0.064  | 0.022  | -0.055  | 0.018  | -0.058   | 2.5e-05 | 0          | 0.73        |
| rs6142096  | 20  | 32686658  | G/A    | GG   | -0.021  | 0.0068 | -0.017  | 0.0057 | -0.019   | 2.2e-05 | 0          | 0.71        |
| rs6013029  | 20  | 36399580  | G/T    | P    | -0.019  | 0.015  | -0.016  | 0.013  | -0.017   | 0.075   | 0          | 0.88        |
| rs6091540  | 20  | 51087862  | C/T    | P    | 0.026   | 0.0075 | 0.033   | 0.0063 | 0.03     | 2.7e-10 | 0          | 0.48        |
| rs2243930  | 20  | 54147462  | G/A    | P    | -0.022  | 0.0081 | -0.023  | 0.0068 | -0.023   | 1.4e-05 | 0          | 0.98        |
| rs11908421 | 20  | 54379667  | T/C    | P    | -0.0007 | 0.0086 | 0.009   | 0.0072 | 0.0049   | 0.37    | 0          | 0.39        |
| rs6089584  | 20  | 60564086  | G/C    | P    | 0.022   | 0.0072 | -0.007  | 0.006  | 0.005    | 0.28    | 90         | 0.0018      |
| rs9983113  | 21  | 40315316  | G/T    | P    | 0.01    | 0.0069 | 0.027   | 0.0058 | 0.02     | 8e-06   | 70         | 0.067       |
| rs427943   | 21  | 46570896  | A/C    | P    | -0.0058 | 0.0069 | -0.0074 | 0.0058 | -0.0068  | 0.13    | 0          | 0.86        |
| rs17759796 | 22  | 22190163  | C/A    | GG   | -0.03   | 0.01   | -0.024  | 0.0084 | -0.027   | 3.2e-05 | 0          | 0.65        |
| rs4820408  | 22  | 40604945  | T/G    | P    | 0.021   | 0.007  | 0.018   | 0.0058 | 0.019    | 1.6e-05 | 0          | 0.79        |
| rs5758651  | 22  | 42609148  | T/C    | P    | 0.018   | 0.0083 | 0.0038  | 0.0069 | 0.0096   | 0.072   | 42         | 0.19        |
| rs56330886 | 22  | 50493427  | T/G    | P    | 0.0074  | 0.038  | 0.039   | 0.031  | 0.026    | 0.28    | 0          | 0.52        |
| rs1379871  | 23  | 31854782  | G/C    | P    | -0.015  | 0.0051 | -0.011  | 0.006  | -0.013   | 0.00055 | 0          | 0.56        |
| rs6529684  | 23  | 53542107  | A/G    | P    | -0.028  | 0.005  | -0.021  | 0.0059 | -0.025   | 3.1e-11 | 0          | 0.4         |
| rs11539157 | 23  | 68381264  | C/A    | P    | 0.017   | 0.006  | 0.0048  | 0.0071 | 0.012    | 0.011   | 39         | 0.2         |
| rs3121672  | 23  | 117916370 | T/C    | P    | -0.033  | 0.0062 | -0.018  | 0.0073 | -0.026   | 2.2e-08 | 58         | 0.12        |
| rs1190736  | 23  | 136113464 | C/A    | P    | 0.0031  | 0.0049 | 0.0089  | 0.0057 | 0.0056   | 0.14    | 0          | 0.44        |
| rs5945324  | 23  | 152894551 | G/C    | P    | -0.0068 | 0.008  | 0.0086  | 0.0093 | -0.00024 | 0.97    | 37         | 0.21        |

**Table S8. Age heterogeneity tests at novel and previously known loci.** P, previously-identified, G, GERA-identified, GG, GERA+GIANT-identified.

| SNP         | Chr | Pos       | Allele | Type | $\beta_{<50}$ | SE $_{<50}$ | $\beta_{>50}$ | SE $_{>50}$ | Meta $\beta$ | Meta P  | Meta $I^2$ | Meta Het. | P |
|-------------|-----|-----------|--------|------|---------------|-------------|---------------|-------------|--------------|---------|------------|-----------|---|
| rs2803328   | 1   | 1874326   | C/G    | P    | -0.0098       | 0.0099      | -0.0042       | 0.005       | -0.0053      | 0.23    | 0          | 0.62      |   |
| rs7535528   | 1   | 2444414   | G/A    | P    | 0.025         | 0.013       | 0.013         | 0.0066      | 0.015        | 0.009   | 0          | 0.41      |   |
| rs12711521  | 1   | 11090916  | C/A    | P    | 0.0024        | 0.012       | -0.0013       | 0.0061      | -0.0005      | 0.93    | 0          | 0.78      |   |
| rs3766160   | 1   | 15808872  | G/A    | P    | 0.038         | 0.011       | 0.007         | 0.0056      | 0.014        | 0.0068  | 84         | 0.011     |   |
| rs10799790  | 1   | 23418153  | C/T    | P    | 0.0071        | 0.012       | 0.012         | 0.0064      | 0.011        | 0.05    | 0          | 0.71      |   |
| rs2076463   | 1   | 27971092  | A/G    | P    | 0.024         | 0.021       | -0.0067       | 0.013       | 0.0017       | 0.88    | 33         | 0.22      |   |
| rs2271928   | 1   | 32127953  | G/A    | P    | 0.0027        | 0.01        | 0.012         | 0.0052      | 0.0097       | 0.036   | 0          | 0.44      |   |
| rs2228552   | 1   | 32165495  | G/T    | P    | -0.0074       | 0.012       | -0.011        | 0.0062      | -0.01        | 0.065   | 0          | 0.8       |   |
| rs2296172   | 1   | 39835817  | A/G    | P    | -0.05         | 0.012       | -0.025        | 0.0061      | -0.03        | 2.2e-08 | 71         | 0.065     |   |
| rs1707322   | 1   | 46505147  | A/G    | P    | -0.009        | 0.011       | 0.0021        | 0.0054      | -0.00021     | 0.96    | 0          | 0.35      |   |
| rs977747    | 1   | 47684677  | T/G    | P    | 0.024         | 0.01        | 0.018         | 0.0051      | 0.02         | 2e-05   | 0          | 0.62      |   |
| rs11583200  | 1   | 50559820  | C/T    | P    | 0.018         | 0.01        | 0.022         | 0.0051      | 0.021        | 5.2e-06 | 0          | 0.75      |   |
| rs12140153  | 1   | 62579891  | G/T    | P    | 0.043         | 0.021       | 0.027         | 0.01        | 0.03         | 0.0012  | 0          | 0.48      |   |
| rs2481665   | 1   | 62594677  | T/C    | P    | 0.014         | 0.01        | 0.023         | 0.0052      | 0.021        | 6.6e-06 | 0          | 0.46      |   |
| rs11209943  | 1   | 72750500  | A/G    | P    | -0.042        | 0.01        | -0.03         | 0.0052      | -0.033       | 2.5e-12 | 0          | 0.33      |   |
| rs12042908  | 1   | 74997762  | A/G    | P    | 0.038         | 0.01        | 0.011         | 0.0051      | 0.016        | 0.00031 | 83         | 0.016     |   |
| rs4130548   | 1   | 78463868  | T/C    | P    | -0.025        | 0.011       | -0.022        | 0.0054      | -0.022       | 4.3e-06 | 0          | 0.78      |   |
| rs540742    | 1   | 78585086  | T/C    | P    | 0.0072        | 0.011       | 0.02          | 0.0059      | 0.017        | 0.0011  | 0          | 0.34      |   |
| rs11165643  | 1   | 96924097  | C/T    | P    | -0.031        | 0.01        | -0.0048       | 0.0051      | -0.01        | 0.024   | 82         | 0.017     |   |
| rs1801265   | 1   | 98348885  | G/A    | P    | -0.0061       | 0.012       | 0.0082        | 0.0061      | 0.0053       | 0.33    | 10         | 0.29      |   |
| rs11185092  | 1   | 107886278 | A/G    | P    | -0.041        | 0.012       | -0.014        | 0.0058      | -0.02        | 0.00013 | 77         | 0.038     |   |
| rs62623713  | 1   | 110019439 | A/G    | P    | -0.036        | 0.023       | -0.014        | 0.011       | -0.018       | 0.074   | 0          | 0.39      |   |
| rs17024393  | 1   | 110154688 | T/C    | P    | -0.041        | 0.032       | -0.018        | 0.016       | -0.022       | 0.11    | 0          | 0.53      |   |
| rs197412    | 1   | 112308953 | T/C    | P    | -0.0043       | 0.0099      | -0.025        | 0.005       | -0.02        | 5.4e-06 | 70         | 0.068     |   |
| rs10923724  | 1   | 119546842 | C/T    | P    | 0.027         | 0.0097      | 0.017         | 0.0049      | 0.019        | 1.6e-05 | 0          | 0.37      |   |
| rs4512652   | 1   | 151115690 | G/C    | P    | 0.016         | 0.011       | 0.012         | 0.0055      | 0.013        | 0.01    | 0          | 0.76      |   |
| rs2297792   | 1   | 156011444 | T/C    | P    | -0.01         | 0.01        | -0.0047       | 0.0052      | -0.0058      | 0.21    | 0          | 0.65      |   |
| rs347313    | 1   | 162304276 | A/G    | P    | -0.0014       | 0.0099      | -0.0053       | 0.005       | -0.0045      | 0.31    | 0          | 0.72      |   |
| rs10913118  | 1   | 175954755 | A/C    | P    | -0.0097       | 0.011       | -0.0083       | 0.0054      | -0.0086      | 0.077   | 0          | 0.91      |   |
| rs574367    | 1   | 177873210 | G/T    | P    | -0.073        | 0.012       | -0.045        | 0.0063      | -0.051       | 8.4e-20 | 74         | 0.05      |   |
| rs591120    | 1   | 177902753 | G/C    | P    | -0.03         | 0.0098      | -0.013        | 0.005       | -0.016       | 0.00022 | 61         | 0.11      |   |
| rs491055    | 1   | 190308834 | A/G    | P    | 0.033         | 0.0099      | 0.018         | 0.005       | 0.022        | 1.7e-06 | 45         | 0.18      |   |
| rs1998710   | 1   | 190670884 | C/T    | P    | -0.01         | 0.0096      | -0.0019       | 0.0049      | -0.0037      | 0.4     | 0          | 0.44      |   |
| rs10754220  | 1   | 197244290 | G/A    | P    | 0.036         | 0.011       | 0.017         | 0.0056      | 0.02         | 4.2e-05 | 56         | 0.13      |   |
| rs16849342  | 1   | 201754444 | G/C    | P    | -0.016        | 0.024       | -0.02         | 0.012       | -0.02        | 0.064   | 0          | 0.87      |   |
| rs2820312   | 1   | 201869257 | G/A    | P    | -0.038        | 0.011       | -0.038        | 0.0054      | -0.038       | 5.3e-15 | 0          | 0.99      |   |
| rs823114    | 1   | 205719532 | G/A    | P    | 0.018         | 0.0097      | 0.001         | 0.005       | 0.0044       | 0.32    | 56         | 0.13      |   |
| rs1704198   | 1   | 213910494 | T/G    | P    | -0.0037       | 0.012       | -0.0021       | 0.0058      | -0.0024      | 0.65    | 0          | 0.9       |   |
| rs9786986   | 1   | 235656632 | G/T    | P    | -0.027        | 0.013       | -0.0028       | 0.0072      | -0.0084      | 0.18    | 63         | 0.1       |   |
| rs1074657   | 1   | 243746634 | T/C    | GG   | 0.022         | 0.01        | 0.02          | 0.0054      | 0.021        | 1.6e-05 | 0          | 0.91      |   |
| rs62106258  | 2   | 417167    | T/C    | G    | 0.19          | 0.026       | 0.07          | 0.012       | 0.093        | 1.9e-17 | 95         | 1.3e-05   |   |
| rs13021737  | 2   | 632348    | A/G    | P    | -0.07         | 0.013       | -0.047        | 0.0066      | -0.052       | 2.6e-18 | 60         | 0.11      |   |
| rs10929925  | 2   | 6155557   | C/A    | P    | 0.025         | 0.0097      | 0.0085        | 0.005       | 0.012        | 0.0074  | 54         | 0.14      |   |
| rs111612372 | 2   | 20433218  | T/C    | P    | -0.02         | 0.011       | 0.0045        | 0.0053      | -0.00045     | 0.92    | 77         | 0.039     |   |
| rs1550116   | 2   | 25022598  | A/G    | P    | -0.033        | 0.014       | -0.018        | 0.007       | -0.021       | 0.00062 | 0          | 0.32      |   |
| rs713586    | 2   | 25158008  | T/C    | P    | -0.042        | 0.0098      | -0.033        | 0.005       | -0.035       | 7.2e-15 | 0          | 0.4       |   |
| rs1561288   | 2   | 25369002  | C/T    | P    | 0.038         | 0.011       | 0.007         | 0.0058      | 0.014        | 0.0071  | 84         | 0.012     |   |
| rs1126666   | 2   | 26928811  | G/A    | P    | -0.015        | 0.012       | -0.013        | 0.006       | -0.013       | 0.014   | 0          | 0.88      |   |
| rs3739081   | 2   | 26955621  | A/G    | P    | 0.022         | 0.0099      | 0.018         | 0.005       | 0.019        | 2.7e-05 | 0          | 0.73      |   |
| rs116612809 | 2   | 28301171  | A/G    | P    | 0.031         | 0.068       | -0.068        | 0.039       | -0.044       | 0.19    | 38         | 0.2       |   |
| rs6734118   | 2   | 37559355  | C/A    | P    | -0.0079       | 0.011       | -0.012        | 0.0058      | -0.011       | 0.034   | 0          | 0.76      |   |
| rs77489951  | 2   | 38750287  | C/T    | P    | -0.033        | 0.004       | 0.006         | 0.022       | -0.0031      | 0.87    | 0          | 0.39      |   |
| rs1396141   | 2   | 41673745  | C/T    | GG   | -0.0091       | 0.011       | -0.022        | 0.0053      | -0.02        | 3.7e-05 | 16         | 0.27      |   |
| rs7580766   | 2   | 42939351  | A/G    | GG   | -0.015        | 0.0099      | -0.018        | 0.005       | -0.017       | 0.00011 | 0          | 0.78      |   |
| rs4596023   | 2   | 48955683  | A/G    | P    | -0.013        | 0.011       | -0.0018       | 0.0056      | -0.0041      | 0.41    | 0          | 0.36      |   |
| rs10174398  | 2   | 51195601  | T/C    | P    | 0.02          | 0.011       | 0.0052        | 0.006       | 0.0085       | 0.11    | 29         | 0.24      |   |
| rs10208649  | 2   | 54161363  | T/C    | P    | 0.016         | 0.021       | 0.0099        | 0.01        | 0.011        | 0.23    | 0          | 0.79      |   |
| rs929641    | 2   | 58792377  | A/G    | P    | 0.01          | 0.0098      | 0.028         | 0.005       | 0.024        | 9e-08   | 61         | 0.11      |   |
| rs13011109  | 2   | 58857419  | G/C    | P    | 0.016         | 0.0099      | 0.023         | 0.0051      | 0.022        | 1.9e-06 | 0          | 0.55      |   |
| rs4671328   | 2   | 58935282  | T/G    | P    | 0.0053        | 0.0098      | 0.035         | 0.0049      | 0.029        | 4.1e-11 | 86         | 0.0066    |   |
| rs1016287   | 2   | 59305625  | T/C    | P    | 0.021         | 0.011       | 0.019         | 0.0055      | 0.019        | 9.3e-05 | 0          | 0.86      |   |
| rs11688816  | 2   | 63053048  | G/A    | P    | 0.0012        | 0.0098      | 0.012         | 0.005       | 0.0095       | 0.032   | 0          | 0.34      |   |
| rs17016673  | 2   | 79497779  | C/G    | P    | -0.049        | 0.015       | -0.021        | 0.0076      | -0.027       | 4.8e-05 | 65         | 0.093     |   |
| rs4851287   | 2   | 100915772 | A/G    | P    | 0.015         | 0.011       | 0.0063        | 0.0053      | 0.0081       | 0.089   | 0          | 0.46      |   |
| rs1451533   | 2   | 105466005 | G/A    | P    | 0.00061       | 0.011       | -0.014        | 0.0055      | -0.011       | 0.027   | 30         | 0.23      |   |
| rs4988235   | 2   | 136608646 | C/A    | P    | -0.025        | 0.01        | -0.014        | 0.005       | -0.016       | 0.00035 | 0          | 0.34      |   |
| rs12617004  | 2   | 142615136 | C/C    | P    | 0.014         | 0.012       | -0.0054       | 0.0058      | -0.0015      | 0.77    | 53         | 0.14      |   |
| rs2890652   | 2   | 142959931 | T/C    | P    | -0.033        | 0.014       | -0.017        | 0.0069      | -0.02        | 0.001   | 11         | 0.29      |   |
| rs6710871   | 2   | 143960593 | C/A    | GG   | -0.039        | 0.014       | -0.021        | 0.007       | -0.025       | 6.7e-05 | 29         | 0.23      |   |
| rs1460676   | 2   | 164567689 | T/C    | P    | -0.011        | 0.013       | -0.013        | 0.0065      | -0.013       | 0.028   | 0          | 0.9       |   |
| rs3769885   | 2   | 165592390 | G/A    | P    | -0.021        | 0.0097      | -0.0038       | 0.0049      | -0.0074      | 0.094   | 60         | 0.11      |   |
| rs2390669   | 2   | 169091942 | A/C    | P    | -0.012        | 0.014       | -0.0037       | 0.007       | -0.0054      | 0.38    | 0          | 0.59      |   |
| rs6433857   | 2   | 181517996 | C/T    | P    | -0.00057      | 0.01        | 0.0073        | 0.0051      | 0.0057       | 0.21    | 0          | 0.48      |   |
| rs11679338  | 2   | 181668895 | C/T    | P    | -0.021        | 0.01        | -0.021        | 0.0053      | -0.021       | 6.1e-06 | 0          | 0.98      |   |
| rs17406900  | 2   | 203784202 | A/G    | P    | -0.013        | 0.0099      | -0.00035      | 0.005       | -0.0028      | 0.52    | 17         | 0.27      |   |
| rs7569376   | 2   | 205385322 | T/C    | P    | 0.00026       | 0.011       | 0.011         | 0.0059      | 0.0089       | 0.087   | 0          | 0.39      |   |
| rs972540    | 2   | 207244783 | A/G    | P    | -0.025        | 0.011       | -0.014        | 0.0056      | -0.017       | 0.001   | 0          | 0.41      |   |
| rs17203016  | 2   | 208255518 | A/G    | P    | -0.0077       | 0.013       | -0.018        | 0.0066      | -0.016       | 0.0075  | 0          | 0.49      |   |
| rs10804189  | 2   | 211988980 | A/G    | P    | 0.019         | 0.011       | 0.013         | 0.0055      | 0.014        | 0.0032  | 0          | 0.63      |   |
| rs6435678   | 2   | 212710468 | G/C    | P    | -0.00054      | 0.015       | -0.0059       | 0.0077      | -0.0048      | 0.49    | 0          | 0.76      |   |
| rs7599312   | 2   | 213413231 | G/A    | P    | 0.02          | 0.012       | 0.021         | 0.0059      | 0.021        | 5.4e-05 | 0          | 0.91      |   |
| rs492400    | 2   | 219349752 | C/T    | P    | 0.0098        | 0.01        | 0.01          | 0.0051      | 0.01         | 0.024   | 0          | 0.96      |   |
| rs4072096   | 2   | 227036603 | A/C    | P    | -0.02         | 0.0096      | -0.0093       | 0.0049      | -0.011       | 0.0088  | 0          | 0.32      |   |
| rs10498218  | 2   | 228006255 | A/G    | P    | 0.16          | 0.13        | -0.003        | 0.083       | 0.045        | 0.52    | 15         | 0.28      |   |
| rs7601000   | 2   | 242610773 | T/A    | P    | -0.011        | 0.014       | 0.0046        | 0.0072      | 0.0015       | 0.82    | 0          | 0.33      |   |
| rs2574704   | 3   | 11655381  | T/C    | P    | -0.012        | 0.01        | -0.0072       | 0.0052      | -0.0081      | 0.078   | 0          | 0.69      |   |
| rs1801282   | 3   | 12393125  | C/G    | P    | -0.022        | 0.016       | -0.023        | 0.0078      | -0.023       | 0.001   | 0          | 0.94      |   |
| rs9845066   | 3   | 13433158  | T/G    | P    | 0.008         | 0.01        | 0.0061        | 0.0051      | 0.0065       | 0.15    | 0          | 0.87      |   |
| rs4857968   | 3   | 20714580  | G/A    | GG   | 0.0081        | 0.012       | 0.028         | 0.0057      | 0.024        | 3.4e-06 | 56         | 0.13      |   |
| rs6804842   | 3   | 25106437  | A/G    | P    | -0.021        | 0.0099      | -0.015        | 0.005       | -0.016       | 0.00023 | 0          | 0.64      |   |
| rs8192473   | 3   | 42299399  | C/T    | P    | 0.0049        | 0.035       | 0.015         | 0.023       | 0.012        | 0.54    | 0          | 0.81      |   |
| rs754635    | 3   | 42305131  | C/G    | P    | -0.041        | 0.014       | -0.034        | 0.0074      | -0.035       | 6.7e-08 | 0          | 0.64      |   |
| rs56084453  | 3   | 44762830  | A/G    | P    | 0.021         | 0.013       | 0.018         | 0.0063      | 0.019        | 0.0009  | 0          | 0.83      |   |
| rs3732530   | 3   | 47618953  | C/A    | P    | 0.0           |             |               |             |              |         |            |           |   |

| SNP             | Chr | Pos       | Allele | Type | $\beta_{<50}$ | SE $_{<50}$ | $\beta_{>50}$ | SE $_{>50}$ | Meta $\beta$ | Meta P  | Meta $I^2$ | Meta Het. | P |
|-----------------|-----|-----------|--------|------|---------------|-------------|---------------|-------------|--------------|---------|------------|-----------|---|
| rs2365389       | 3   | 61236462  | C/T    | P    | 0.022         | 0.01        | 0.021         | 0.0051      | 0.021        | 3.7e-06 | 0          | 0.9       |   |
| chr3:77646862:D | 3   | 77646862  | TG/T   | G    | 0.022         | 0.01        | 0.029         | 0.0051      | 0.027        | 1.8e-09 | 0          | 0.55      |   |
| rs1840969       | 3   | 78830840  | T/A    | P    | -0.012        | 0.0098      | 0.00065       | 0.005       | -0.0019      | 0.68    | 18         | 0.27      |   |
| rs6792696       | 3   | 81874009  | G/A    | P    | 0.0083        | 0.01        | -0.012        | 0.0052      | -0.0078      | 0.091   | 68         | 0.077     |   |
| rs6794880       | 3   | 84451512  | G/A    | P    | -0.023        | 0.014       | -0.0082       | 0.0072      | -0.011       | 0.081   | 0          | 0.37      |   |
| rs9852859       | 3   | 85842341  | T/C    | P    | -0.042        | 0.013       | -0.017        | 0.0063      | -0.022       | 9.5e-05 | 67         | 0.082     |   |
| rs12495178      | 3   | 85886077  | T/C    | P    | 0.014         | 0.01        | 0.026         | 0.0051      | 0.024        | 1.9e-07 | 22         | 0.26      |   |
| rs7653652       | 3   | 88189341  | T/C    | P    | -0.028        | 0.013       | -0.0029       | 0.0068      | -0.0083      | 0.17    | 66         | 0.088     |   |
| rs2173039       | 3   | 89142175  | G/C    | P    | -0.00048      | 0.011       | -0.0075       | 0.0057      | -0.0061      | 0.23    | 0          | 0.58      |   |
| rs1436351       | 3   | 104617973 | G/T    | GG   | -0.023        | 0.011       | -0.019        | 0.0056      | -0.02        | 6.2e-05 | 0          | 0.72      |   |
| rs7640424       | 3   | 107820063 | C/T    | P    | -0.0037       | 0.012       | 0.011         | 0.0057      | 0.0085       | 0.095   | 28         | 0.24      |   |
| rs2868975       | 3   | 116935323 | G/A    | P    | 0.024         | 0.012       | 0.015         | 0.0064      | 0.017        | 0.0033  | 0          | 0.48      |   |
| rs1542829       | 3   | 130137471 | G/A    | P    | 0.0073        | 0.017       | 0.0018        | 0.0095      | 0.0031       | 0.71    | 0          | 0.78      |   |
| rs876424        | 3   | 131637676 | T/G    | P    | -0.016        | 0.01        | -0.014        | 0.0051      | -0.015       | 0.0012  | 0          | 0.88      |   |
| rs7621025       | 3   | 136272246 | T/C    | P    | -0.018        | 0.011       | -0.0089       | 0.0057      | -0.011       | 0.034   | 0          | 0.47      |   |
| rs1052618       | 3   | 136574501 | A/G    | P    | -0.027        | 0.011       | -0.01         | 0.0054      | -0.014       | 0.0047  | 45         | 0.18      |   |
| rs1720825       | 3   | 138108083 | A/G    | P    | 0.011         | 0.013       | 0.021         | 0.0065      | 0.019        | 0.00094 | 0          | 0.48      |   |
| rs16851483      | 3   | 141275436 | G/T    | P    | -0.0098       | 0.017       | -0.012        | 0.0093      | -0.012       | 0.16    | 0          | 0.9       |   |
| rs9438          | 3   | 154018887 | G/C    | P    | -0.017        | 0.0098      | -0.012        | 0.005       | -0.013       | 0.0043  | 0          | 0.6       |   |
| rs2649734       | 3   | 157347640 | G/A    | P    | 0.00056       | 0.01        | 0.012         | 0.0051      | 0.0097       | 0.035   | 2          | 0.31      |   |
| rs13069244      | 3   | 180441172 | G/A    | P    | -0.0064       | 0.02        | -0.017        | 0.0099      | -0.015       | 0.086   | 0          | 0.62      |   |
| rs11546878      | 3   | 183976103 | C/T    | P    | 0.014         | 0.014       | 0.0012        | 0.0068      | 0.0038       | 0.53    | 0          | 0.39      |   |
| rs2178403       | 3   | 184039666 | A/G    | P    | 0.022         | 0.012       | 0.015         | 0.0063      | 0.016        | 0.0034  | 0          | 0.61      |   |
| rs4686392       | 3   | 185524081 | A/G    | P    | -0.0016       | 0.011       | 0.0045        | 0.0054      | 0.0032       | 0.5     | 0          | 0.61      |   |
| rs9816226       | 3   | 185834499 | A/T    | P    | -0.011        | 0.013       | -0.043        | 0.0066      | -0.037       | 4.3e-10 | 80         | 0.026     |   |
| rs34811474      | 4   | 25408838  | G/A    | P    | 0.024         | 0.013       | 0.042         | 0.0062      | 0.039        | 4.7e-12 | 43         | 0.19      |   |
| rs16992647      | 4   | 36813105  | C/T    | P    | -0.013        | 0.013       | 0.018         | 0.0066      | 0.011        | 0.061   | 78         | 0.032     |   |
| rs4833079       | 4   | 38654681  | T/C    | GG   | 0.027         | 0.011       | 0.021         | 0.0053      | 0.022        | 3.7e-06 | 0          | 0.56      |   |
| rs12641981      | 4   | 45179883  | C/T    | P    | -0.034        | 0.0099      | -0.026        | 0.005       | -0.028       | 4.1e-10 | 0          | 0.48      |   |
| rs17001654      | 4   | 77129568  | C/G    | P    | 0.013         | 0.014       | -0.0094       | 0.007       | -0.0049      | 0.44    | 52         | 0.15      |   |
| rs13107325      | 4   | 103188709 | C/T    | P    | -0.059        | 0.02        | -0.055        | 0.0098      | -0.056       | 3.7e-10 | 0          | 0.84      |   |
| rs4834272       | 4   | 113313986 | T/C    | P    | -0.0072       | 0.01        | -0.0068       | 0.0053      | -0.0069      | 0.14    | 0          | 0.98      |   |
| rs3749591       | 4   | 120214030 | T/G    | P    | -0.0097       | 0.01        | -0.014        | 0.0053      | -0.014       | 0.0041  | 0          | 0.68      |   |
| rs10019997      | 4   | 137048599 | C/T    | GG   | -0.043        | 0.0099      | -0.015        | 0.005       | -0.021       | 4e-06   | 85         | 0.01      |   |
| rs11727676      | 4   | 145659064 | T/C    | P    | 0.039         | 0.018       | 0.013         | 0.0088      | 0.018        | 0.023   | 33         | 0.22      |   |
| rs112778462     | 5   | 2177693   | G/A    | P    | 0.19          | 0.14        | -0.014        | 0.085       | 0.04         | 0.58    | 37         | 0.21      |   |
| rs4865796       | 5   | 53272664  | C/A    | P    | 0.025         | 0.011       | 0.012         | 0.0055      | 0.015        | 0.0035  | 3.9        | 0.31      |   |
| rs7720894       | 5   | 60733933  | C/C    | P    | 0.016         | 0.0098      | 0.0065        | 0.005       | 0.0085       | 0.058   | 0          | 0.39      |   |
| rs1503526       | 5   | 63020706  | T/C    | P    | -0.02         | 0.01        | -0.014        | 0.005       | -0.015       | 0.00078 | 0          | 0.59      |   |
| rs1035491       | 5   | 63962177  | A/G    | P    | 0.014         | 0.01        | -0.002        | 0.0053      | 0.0013       | 0.79    | 47         | 0.17      |   |
| rs3811987       | 5   | 74324548  | G/A    | P    | 0.01          | 0.011       | 0.014         | 0.0055      | 0.013        | 0.0064  | 0          | 0.75      |   |
| rs6893216       | 5   | 74442964  | T/C    | P    | -0.00073      | 0.014       | 0.02          | 0.0075      | 0.015        | 0.021   | 37         | 0.21      |   |
| rs2307111       | 5   | 75003678  | T/C    | P    | 0.028         | 0.0098      | 0.029         | 0.005       | 0.029        | 1e-10   | 0          | 0.92      |   |
| rs6870983       | 5   | 87697533  | C/T    | P    | 0.032         | 0.012       | 0.021         | 0.0059      | 0.023        | 1.4e-05 | 0          | 0.4       |   |
| rs16903285      | 5   | 87978252  | T/C    | P    | -0.019        | 0.013       | -0.023        | 0.0068      | -0.022       | 0.00021 | 0          | 0.78      |   |
| rs6234          | 5   | 95728974  | G/C    | P    | -0.025        | 0.011       | -0.013        | 0.0056      | -0.015       | 0.0023  | 0          | 0.33      |   |
| rs261967        | 5   | 95850250  | A/C    | P    | -0.025        | 0.0098      | -0.016        | 0.005       | -0.018       | 7.4e-05 | 0          | 0.41      |   |
| rs10062657      | 5   | 95867908  | C/A    | P    | 0.022         | 0.014       | 0.019         | 0.0075      | 0.02         | 0.0029  | 0          | 0.82      |   |
| rs30187         | 5   | 96124330  | T/C    | P    | -0.0029       | 0.01        | -0.017        | 0.0051      | -0.014       | 0.0018  | 38         | 0.2       |   |
| rs40067         | 5   | 107439012 | G/A    | P    | 0.014         | 0.013       | 0.013         | 0.0065      | 0.013        | 0.023   | 0          | 0.93      |   |
| rs1045706       | 5   | 108714298 | T/C    | P    | -0.022        | 0.01        | -0.01         | 0.0051      | -0.012       | 0.0064  | 13         | 0.28      |   |
| rs459552        | 5   | 112176756 | T/A    | P    | 0.0081        | 0.012       | 0.0035        | 0.006       | 0.0044       | 0.42    | 0          | 0.73      |   |
| rs4308481       | 5   | 122652106 | C/T    | P    | 0.024         | 0.01        | 0.019         | 0.0051      | 0.02         | 8.2e-06 | 0          | 0.66      |   |
| rs4357030       | 5   | 124316031 | C/T    | P    | 0.0017        | 0.011       | -0.0074       | 0.0058      | -0.0055      | 0.28    | 0          | 0.47      |   |
| rs4836133       | 5   | 124332103 | C/A    | P    | -0.0047       | 0.0098      | -0.012        | 0.005       | -0.01        | 0.021   | 0          | 0.52      |   |
| rs329120        | 5   | 133861756 | C/T    | P    | 0.0075        | 0.0099      | 0.011         | 0.005       | 0.01         | 0.026   | 0          | 0.78      |   |
| rs13174863      | 5   | 139080745 | A/G    | P    | -0.028        | 0.016       | -0.018        | 0.0082      | -0.02        | 0.0063  | 0          | 0.6       |   |
| rs815610        | 5   | 153517178 | C/G    | P    | 0.018         | 0.01        | 0.021         | 0.0051      | 0.02         | 9.2e-06 | 0          | 0.77      |   |
| rs7730898       | 5   | 170459675 | G/A    | GG   | -0.024        | 0.011       | -0.022        | 0.0057      | -0.023       | 7.8e-06 | 0          | 0.87      |   |
| rs12513649      | 5   | 172472052 | C/G    | P    | 0.0011        | 0.038       | -0.013        | 0.026       | -0.0086      | 0.69    | 0          | 0.76      |   |
| rs3849724       | 5   | 173290977 | G/T    | P    | 0.0023        | 0.01        | 0.011         | 0.005       | 0.0092       | 0.042   | 0          | 0.45      |   |
| rs7715356       | 5   | 179129492 | A/G    | P    | -0.001        | 0.011       | 0.0015        | 0.0054      | 0.001        | 0.83    | 0          | 0.83      |   |
| rs2228210       | 6   | 12122174  | A/G    | P    | 0.016         | 0.01        | 0.012         | 0.0053      | 0.013        | 0.0074  | 0          | 0.68      |   |
| rs2206734       | 6   | 20694884  | C/T    | P    | 0.014         | 0.012       | 0.014         | 0.0062      | 0.014        | 0.011   | 0          | 1         |   |
| rs183975233     | 6   | 32437160  | T/A    | P    | -0.0063       | 0.01        | -0.00054      | 0.0053      | -0.0017      | 0.72    | 0          | 0.63      |   |
| rs943466        | 6   | 33731787  | G/A    | P    | 0.01          | 0.012       | 0.014         | 0.0059      | 0.013        | 0.011   | 0          | 0.74      |   |
| rs10947487      | 6   | 34189612  | A/G    | P    | -0.011        | 0.019       | 0.0026        | 0.011       | -0.00066     | 0.94    | 0          | 0.55      |   |
| rs206936        | 6   | 34302869  | A/G    | P    | -0.015        | 0.011       | -0.021        | 0.0059      | -0.02        | 0.00014 | 0          | 0.6       |   |
| rs7757419       | 6   | 34439569  | A/T    | P    | 0.0021        | 0.013       | -0.024        | 0.0065      | -0.019       | 0.0013  | 70         | 0.07      |   |
| rs41312309      | 6   | 34498328  | C/T    | P    | -0.0017       | 0.021       | -0.013        | 0.01        | -0.011       | 0.24    | 0          | 0.64      |   |
| rs6457796       | 6   | 34828553  | T/C    | P    | -0.017        | 0.011       | -0.016        | 0.0055      | -0.016       | 0.0013  | 0          | 0.89      |   |
| rs2033529       | 6   | 40348653  | A/G    | P    | -0.014        | 0.011       | -0.019        | 0.0056      | -0.018       | 0.00038 | 0          | 0.67      |   |
| rs78648104      | 6   | 50683009  | T/C    | P    | 0.029         | 0.017       | 0.022         | 0.0087      | 0.024        | 0.0023  | 0          | 0.72      |   |
| rs2206277       | 6   | 50798526  | C/T    | P    | -0.033        | 0.012       | -0.028        | 0.0063      | -0.029       | 1.7e-07 | 0          | 0.71      |   |
| rs12199003      | 6   | 55196587  | C/T    | P    | -0.01         | 0.0098      | -0.0049       | 0.005       | -0.0059      | 0.18    | 0          | 0.64      |   |
| rs148546399     | 6   | 64705610  | G/A    | P    | 0.09          | 0.13        | -0.015        | 0.068       | 0.008        | 0.89    | 0          | 0.46      |   |
| rs513357        | 6   | 69558698  | A/G    | G    | 0.031         | 0.014       | 0.038         | 0.0077      | 0.036        | 6.8e-08 | 0          | 0.66      |   |
| rs947612        | 6   | 73738661  | G/A    | GG   | 0.0057        | 0.011       | 0.034         | 0.0057      | 0.028        | 2.9e-08 | 81         | 0.023     |   |
| rs17057164      | 6   | 97410536  | T/C    | P    | -0.0048       | 0.013       | 0.0031        | 0.0067      | 0.0014       | 0.81    | 0          | 0.59      |   |
| rs4498364       | 6   | 97613773  | C/T    | P    | 0.02          | 0.011       | 0.0089        | 0.0054      | 0.011        | 0.021   | 0          | 0.36      |   |
| rs901630        | 6   | 98539519  | C/T    | GG   | -0.00017      | 0.01        | 0.021         | 0.0051      | 0.017        | 0.00022 | 72         | 0.058     |   |
| rs9400239       | 6   | 108977663 | T/C    | P    | -0.018        | 0.01        | -0.024        | 0.0054      | -0.022       | 2.8e-06 | 0          | 0.62      |   |
| rs2357760       | 6   | 120213880 | G/A    | P    | -0.016        | 0.01        | -0.0072       | 0.0053      | -0.009       | 0.056   | 0          | 0.47      |   |
| rs6569648       | 6   | 130349119 | C/T    | GG   | 0.023         | 0.012       | 0.013         | 0.0061      | 0.015        | 0.0068  | 0          | 0.47      |   |
| rs13201877      | 6   | 137675541 | A/G    | P    | 0.013         | 0.015       | -0.0085       | 0.0075      | -0.0043      | 0.52    | 37         | 0.21      |   |
| rs2185027       | 6   | 153381622 | A/C    | P    | -0.026        | 0.01        | -0.012        | 0.0053      | -0.015       | 0.0015  | 33         | 0.22      |   |
| rs487152        | 6   | 160774486 | C/A    | P    | -0.036        | 0.0098      | -0.017        | 0.005       | -0.021       | 2.1e-06 | 66         | 0.089     |   |
| rs13191362      | 6   | 163033350 | A/G    | P    | 0.02          | 0.016       | 0.019         | 0.0079      | 0.019        | 0.0068  | 0          | 0.95      |   |
| rs9364687       | 6   | 163817911 | G/T    | GG   | 0.017         | 0.01        | 0.017         | 0.0051      | 0.017        | 0.00025 | 0          | 0.96      |   |
| rs1830074       | 7   | 6718674   | T/C    | P    | -0.0069       | 0.011       | -0.0076       | 0.0057      | -0.0074      | 0.14    | 0          | 0.96      |   |
| rs10261878      | 7   | 25950545  | A/C    | P    | 0.0076        | 0.018       | -0.023        | 0.0097      | -0.016       | 0.061   | 52         | 0.15      |   |
| rs215607        | 7   | 32338337  | G/A    | P    | 0.014         | 0.012       | 0.024         | 0.0059      | 0.022        | 3.5e-05 | 0          | 0.46      |   |
| rs10269783      | 7   | 49616203  | G/A    | P    | -0.0089       | 0.0099      | -0.009        | 0.0051      | -0.009       | 0.047   | 0          | 0.99      |   |
| rs11765748      | 7   | 50615616  | T/A    | P    | 0.0092        | 0.0097      | 0.013         | 0.005       | 0.012        | 0.0059  | 0          | 0.73      |   |
| rs694739        |     |           |        |      |               |             |               |             |              |         |            |           |   |

| SNP         | Chr | Pos       | Allele | Type | $\beta_{<50}$ | SE <sub>&lt;50</sub> | $\beta_{>50}$ | SE <sub>&gt;50</sub> | Meta $\beta$ | Meta P  | Meta $I^2$ | Meta Het. | P |
|-------------|-----|-----------|--------|------|---------------|----------------------|---------------|----------------------|--------------|---------|------------|-----------|---|
| rs6990042   | 8   | 14173974  | G/T    | P    | 0.00026       | 0.0099               | 0.011         | 0.005                | 0.0088       | 0.05    | 0          | 0.34      |   |
| rs149352150 | 8   | 19736154  | A/G    | P    | -0.022        | 0.2                  | -0.073        | 0.12                 | -0.059       | 0.58    | 0          | 0.83      |   |
| rs12156392  | 8   | 28140103  | C/A    | P    | -0.021        | 0.01                 | -0.0094       | 0.0051               | -0.012       | 0.0089  | 13         | 0.28      |   |
| rs10091344  | 8   | 34132075  | G/A    | P    | 0.016         | 0.01                 | 0.0084        | 0.0053               | 0.01         | 0.031   | 0          | 0.49      |   |
| rs6471932   | 8   | 62078904  | T/A    | GG   | 0.017         | 0.016                | 0.027         | 0.0081               | 0.025        | 0.00053 | 0          | 0.55      |   |
| rs77636220  | 8   | 64552779  | G/A    | P    | -0.018        | 0.024                | -0.026        | 0.013                | -0.024       | 0.038   | 0          | 0.76      |   |
| rs6994670   | 8   | 65191812  | A/G    | P    | -0.011        | 0.02                 | -0.0031       | 0.011                | -0.0049      | 0.62    | 0          | 0.74      |   |
| rs28857569  | 8   | 76697034  | T/C    | P    | -0.044        | 0.012                | -0.019        | 0.006                | -0.024       | 5.9e-06 | 73         | 0.053     |   |
| rs17405819  | 8   | 76806584  | T/C    | P    | 0.052         | 0.011                | 0.024         | 0.0054               | 0.03         | 4.9e-10 | 82         | 0.019     |   |
| rs1051920   | 8   | 81438420  | C/T    | P    | 0.035         | 0.011                | 0.011         | 0.0057               | 0.016        | 0.0019  | 74         | 0.052     |   |
| rs733594    | 8   | 85077686  | C/T    | P    | -0.0063       | 0.011                | -0.018        | 0.0055               | -0.016       | 0.0012  | 0          | 0.32      |   |
| rs4366055   | 8   | 95507328  | A/C    | P    | 0.0033        | 0.011                | 0.013         | 0.0056               | 0.011        | 0.031   | 0          | 0.43      |   |
| rs3134353   | 8   | 101947453 | A/T    | P    | -0.0083       | 0.0099               | -0.0092       | 0.0051               | -0.009       | 0.048   | 0          | 0.94      |   |
| rs3802177   | 8   | 118185025 | G/A    | P    | 0.0019        | 0.011                | -0.0013       | 0.0054               | -0.00067     | 0.89    | 0          | 0.78      |   |
| rs12352785  | 9   | 6956850   | A/C    | GG   | 0.037         | 0.011                | 0.019         | 0.0055               | 0.022        | 8.9e-06 | 52         | 0.15      |   |
| rs4740619   | 9   | 15634326  | T/C    | P    | -0.0019       | 0.0099               | 0.015         | 0.005                | 0.011        | 0.011   | 56         | 0.13      |   |
| rs10811661  | 9   | 22134094  | T/C    | P    | 0.013         | 0.012                | 0.0029        | 0.0064               | 0.0051       | 0.37    | 0          | 0.47      |   |
| rs1934100   | 9   | 23234308  | A/T    | P    | -0.003        | 0.011                | 0.0044        | 0.0055               | 0.0029       | 0.56    | 0          | 0.54      |   |
| rs10811901  | 9   | 23356935  | G/A    | P    | -0.0071       | 0.01                 | -0.0084       | 0.005                | -0.0082      | 0.069   | 0          | 0.91      |   |
| rs10968577  | 9   | 28415512  | C/T    | P    | -0.023        | 0.011                | -0.026        | 0.0054               | -0.026       | 9e-08   | 0          | 0.8       |   |
| rs11142387  | 9   | 72998332  | A/C    | P    | -0.0027       | 0.0098               | 0.0042        | 0.005                | 0.0028       | 0.53    | 0          | 0.53      |   |
| rs10868215  | 9   | 87234111  | T/C    | P    | 0.0019        | 0.01                 | 0.012         | 0.0051               | 0.0097       | 0.034   | 0          | 0.38      |   |
| rs1147199   | 9   | 87275895  | A/G    | P    | -0.02         | 0.012                | -0.0044       | 0.0062               | -0.0077      | 0.16    | 24         | 0.25      |   |
| rs80068415  | 9   | 92093127  | T/C    | P    | 0.12          | 0.28                 | 0.22          | 0.15                 | 0.2          | 0.14    | 0          | 0.77      |   |
| rs12236219  | 9   | 97062981  | C/T    | P    | -0.016        | 0.017                | 0.027         | 0.0099               | 0.016        | 0.061   | 79         | 0.028     |   |
| rs3932549   | 9   | 97073588  | A/C    | P    | 0.0038        | 0.01                 | 0.0072        | 0.0053               | 0.0065       | 0.17    | 0          | 0.77      |   |
| rs7855432   | 9   | 100760113 | G/T    | P    | 0.011         | 0.012                | 0.00017       | 0.006                | 0.0024       | 0.65    | 0          | 0.41      |   |
| rs580809    | 9   | 101518442 | C/T    | P    | 0.013         | 0.011                | 0.011         | 0.0058               | 0.012        | 0.024   | 0          | 0.9       |   |
| rs7024334   | 9   | 109072075 | T/G    | P    | 0.018         | 0.011                | 0.0067        | 0.0059               | 0.0092       | 0.075   | 0          | 0.36      |   |
| rs6477694   | 9   | 111932342 | C/T    | P    | 0.015         | 0.01                 | 0.012         | 0.0051               | 0.013        | 0.0045  | 0          | 0.8       |   |
| rs1928295   | 9   | 120378483 | T/C    | P    | 0.031         | 0.0097               | 0.0062        | 0.005                | 0.011        | 0.011   | 80         | 0.025     |   |
| rs10760279  | 9   | 126105291 | G/T    | P    | -0.014        | 0.012                | -0.018        | 0.006                | -0.017       | 0.0013  | 0          | 0.77      |   |
| rs1105223   | 9   | 126128211 | T/C    | P    | -0.0042       | 0.011                | 0.013         | 0.0058               | 0.0094       | 0.068   | 47         | 0.17      |   |
| rs5015933   | 9   | 128137418 | T/C    | P    | 0.014         | 0.0098               | 0.0088        | 0.005                | 0.0098       | 0.029   | 0          | 0.66      |   |
| rs2235056   | 9   | 129377235 | C/T    | P    | 0.013         | 0.017                | 0.027         | 0.0098               | 0.024        | 0.0058  | 0          | 0.48      |   |
| rs10733682  | 9   | 129460914 | A/G    | P    | 0.022         | 0.011                | 0.021         | 0.0057               | 0.021        | 3.2e-05 | 0          | 0.91      |   |
| rs2270204   | 9   | 131042734 | T/G    | P    | -0.019        | 0.012                | -0.012        | 0.006                | -0.014       | 0.011   | 0          | 0.58      |   |
| rs2280843   | 9   | 131585069 | A/G    | P    | -0.015        | 0.011                | 0.0039        | 0.0057               | 6.2e-05      | 0.99    | 55         | 0.14      |   |
| rs12253976  | 10  | 3835732   | T/G    | P    | 0.0019        | 0.086                | -0.022        | 0.049                | -0.016       | 0.7     | 0          | 0.81      |   |
| rs11257655  | 10  | 12307894  | C/T    | P    | 0.012         | 0.012                | 0.016         | 0.0061               | 0.015        | 0.005   | 0          | 0.75      |   |
| rs1277723   | 10  | 18554623  | G/A    | P    | -0.017        | 0.011                | -0.01         | 0.0059               | -0.012       | 0.026   | 0          | 0.63      |   |
| rs2274741   | 10  | 27303605  | A/T    | P    | -0.015        | 0.013                | -0.015        | 0.0068               | -0.015       | 0.011   | 0          | 0.99      |   |
| rs118067556 | 10  | 63136165  | C/T    | GG   | 0.045         | 0.029                | 0.054         | 0.014                | 0.052        | 4.1e-05 | 0          | 0.79      |   |
| rs2163188   | 10  | 65314711  | G/C    | P    | -0.021        | 0.0097               | -0.014        | 0.005                | -0.015       | 0.00057 | 0          | 0.53      |   |
| rs80117551  | 10  | 69834828  | C/T    | P    | -0.013        | 0.027                | 0.033         | 0.018                | 0.018        | 0.23    | 52         | 0.15      |   |
| rs3088142   | 10  | 76854564  | C/T    | P    | -0.006        | 0.01                 | -0.0056       | 0.0051               | -0.0057      | 0.21    | 0          | 0.97      |   |
| rs7899106   | 10  | 87410904  | A/G    | P    | -0.046        | 0.023                | -0.037        | 0.012                | -0.038       | 0.00026 | 0          | 0.71      |   |
| rs7923837   | 10  | 94481917  | G/A    | P    | -0.024        | 0.01                 | -0.011        | 0.0052               | -0.014       | 0.0029  | 22         | 0.26      |   |
| rs12569457  | 10  | 99096676  | C/T    | P    | 0.022         | 0.031                | -0.0078       | 0.017                | -0.00091     | 0.95    | 0          | 0.4       |   |
| rs11189513  | 10  | 99969568  | A/G    | P    | 0.026         | 0.01                 | 0.022         | 0.0053               | 0.023        | 1.6e-06 | 0          | 0.73      |   |
| rs17094222  | 10  | 102395440 | T/C    | P    | -0.028        | 0.012                | -0.022        | 0.0064               | -0.024       | 3.1e-05 | 0          | 0.67      |   |
| rs2495707   | 10  | 102425949 | A/G    | P    | 0.024         | 0.012                | 0.021         | 0.0061               | 0.022        | 4.9e-05 | 0          | 0.83      |   |
| rs284860    | 10  | 104572963 | T/C    | P    | 0.0058        | 0.0099               | 0.0071        | 0.0051               | 0.0069       | 0.13    | 0          | 0.91      |   |
| rs11191580  | 10  | 104906211 | T/C    | P    | -0.05         | 0.015                | -0.03         | 0.0083               | -0.035       | 2.2e-06 | 22         | 0.26      |   |
| rs7903146   | 10  | 114758349 | C/T    | P    | 0.0069        | 0.011                | 0.019         | 0.0056               | 0.017        | 0.0009  | 0          | 0.34      |   |
| rs10886017  | 10  | 118672531 | C/A    | P    | -0.0095       | 0.011                | -0.018        | 0.0057               | -0.017       | 0.001   | 0          | 0.47      |   |
| rs2257129   | 10  | 122898697 | T/C    | P    | 0.0077        | 0.019                | 0.0012        | 0.012                | 0.0029       | 0.77    | 0          | 0.77      |   |
| rs1568079   | 10  | 125251751 | T/A    | P    | 0.023         | 0.011                | 0.013         | 0.0057               | 0.015        | 0.003   | 0          | 0.43      |   |
| rs1561589   | 10  | 126695673 | G/A    | P    | -0.014        | 0.011                | -0.022        | 0.0054               | -0.02        | 3.3e-05 | 0          | 0.52      |   |
| rs7126805   | 11  | 828916    | G/A    | P    | -0.00071      | 0.015                | -0.015        | 0.0077               | -0.012       | 0.073   | 0          | 0.38      |   |
| rs2237892   | 11  | 2839751   | C/T    | P    | -0.024        | 0.022                | -0.024        | 0.013                | -0.024       | 0.029   | 0          | 0.99      |   |
| rs10840100  | 11  | 8669437   | A/G    | P    | -0.009        | 0.01                 | -0.012        | 0.0052               | -0.011       | 0.013   | 0          | 0.79      |   |
| rs7938308   | 11  | 13320533  | C/T    | G    | 0.037         | 0.011                | 0.026         | 0.0056               | 0.028        | 2.1e-08 | 0          | 0.36      |   |
| rs7928810   | 11  | 17372443  | C/A    | P    | -0.0011       | 0.01                 | -0.0038       | 0.0052               | -0.0033      | 0.48    | 0          | 0.81      |   |
| rs80317617  | 11  | 27362257  | T/C    | P    | -0.0014       | 0.023                | -0.044        | 0.011                | -0.036       | 0.0003  | 65         | 0.092     |   |
| rs6265      | 11  | 27679916  | C/T    | P    | 0.03          | 0.012                | 0.042         | 0.0062               | 0.039        | 1.6e-12 | 0          | 0.39      |   |
| rs4517468   | 11  | 27688286  | A/T    | P    | 0.045         | 0.01                 | 0.037         | 0.0053               | 0.038        | 3.8e-16 | 0          | 0.45      |   |
| rs3026401   | 11  | 31807524  | C/T    | P    | -0.021        | 0.011                | -0.0048       | 0.0059               | -0.0083      | 0.11    | 40         | 0.2       |   |
| rs652722    | 11  | 31905534  | C/T    | P    | 0.0091        | 0.011                | 0.0046        | 0.0056               | 0.0055       | 0.26    | 0          | 0.71      |   |
| rs4755726   | 11  | 43642130  | T/G    | P    | 0.014         | 0.011                | 0.02          | 0.0055               | 0.019        | 0.00012 | 0          | 0.64      |   |
| rs10742752  | 11  | 45438374  | T/C    | GG   | -0.013        | 0.01                 | -0.018        | 0.0051               | -0.017       | 0.00015 | 0          | 0.65      |   |
| rs3816605   | 11  | 47857253  | T/C    | P    | 0.032         | 0.0098               | 0.017         | 0.005                | 0.02         | 4.1e-06 | 47         | 0.17      |   |
| rs506338    | 11  | 64440920  | T/C    | P    | 0.011         | 0.01                 | -0.0068       | 0.0054               | -0.003       | 0.53    | 57         | 0.13      |   |
| rs12273892  | 11  | 64480930  | A/T    | P    | -0.017        | 0.014                | 0.023         | 0.0073               | 0.015        | 0.022   | 84         | 0.012     |   |
| rs11607976  | 11  | 69279111  | C/T    | P    | 0.017         | 0.012                | 0.0048        | 0.0062               | 0.0072       | 0.19    | 0          | 0.39      |   |
| rs7123876   | 11  | 72444583  | T/C    | P    | -0.019        | 0.012                | -0.0061       | 0.0059               | -0.0088      | 0.094   | 3.6        | 0.31      |   |
| rs10899469  | 11  | 78018313  | T/C    | P    | -0.00041      | 0.012                | 0.0073        | 0.0065               | 0.0057       | 0.32    | 0          | 0.58      |   |
| rs1816537   | 11  | 112968651 | A/C    | P    | -0.033        | 0.01                 | -0.012        | 0.0051               | -0.016       | 0.00031 | 70         | 0.066     |   |
| rs12286929  | 11  | 115022404 | A/G    | P    | -0.0077       | 0.01                 | -0.02         | 0.0051               | -0.017       | 0.00016 | 11         | 0.29      |   |
| rs15818     | 11  | 118952173 | A/G    | P    | -0.022        | 0.01                 | -0.0023       | 0.0052               | -0.0064      | 0.16    | 68         | 0.079     |   |
| rs11611246  | 12  | 939480    | G/T    | P    | -0.023        | 0.012                | -0.026        | 0.006                | -0.025       | 2.9e-06 | 0          | 0.86      |   |
| rs12828016  | 12  | 998365    | G/T    | P    | 0.026         | 0.01                 | 0.0089        | 0.0051               | 0.012        | 0.0056  | 60         | 0.11      |   |
| rs10772983  | 12  | 17141582  | C/T    | P    | 0.015         | 0.0098               | 0.01          | 0.0049               | 0.011        | 0.012   | 0          | 0.64      |   |
| rs7970953   | 12  | 24075508  | G/A    | P    | -0.0018       | 0.01                 | -0.014        | 0.0053               | -0.011       | 0.016   | 8.8        | 0.29      |   |
| rs80234489  | 12  | 31441179  | A/C    | P    | 0.016         | 0.036                | 0.03          | 0.024                | 0.026        | 0.19    | 0          | 0.75      |   |
| rs11170468  | 12  | 39430048  | A/C    | GG   | 0.014         | 0.012                | 0.012         | 0.0061               | 0.012        | 0.025   | 0          | 0.87      |   |
| rs1405552   | 12  | 41746673  | G/A    | P    | 0.024         | 0.0098               | 0.014         | 0.005                | 0.016        | 0.0004  | 0          | 0.36      |   |
| rs11181001  | 12  | 41948196  | A/G    | P    | 0.0089        | 0.01                 | 0.016         | 0.0051               | 0.015        | 0.0014  | 0          | 0.53      |   |
| rs1126930   | 12  | 49399132  | G/C    | P    | 0.0057        | 0.03                 | -0.022        | 0.015                | -0.016       | 0.22    | 0          | 0.42      |   |
| rs7132908   | 12  | 50263148  | G/A    | P    | -0.035        | 0.01                 | -0.021        | 0.0053               | -0.024       | 3.9e-07 | 35         | 0.22      |   |
| rs77511173  | 12  | 53883537  | T/C    | P    | 0.023         | 0.028                | 0.013         | 0.014                | 0.015        | 0.24    | 0          | 0.74      |   |
| rs1819844   | 12  | 68205604  | A/G    | GG   | 0.017         | 0.012                | 0.027         | 0.0064               | 0.025        | 1.3e-05 | 0          | 0.45      |   |
| rs61754230  | 12  | 72179446  | C/T    | P    | 0.018         | 0.055                | -0.016        | 0.026                | -0.0096      | 0.69    | 0          | 0.58      |   |
| rs10777237  | 12  | 90643524  | T/C    | P    | 0.022         | 0.011                | 0.0081        | 0.0055               | 0.011        | 0.024   | 29         |           |   |

| SNP         | Chr | Pos       | Allele | Type | $\beta_{<50}$ | SE $_{<50}$ | $\beta_{>50}$ | SE $_{>50}$ | Meta $\beta$ | Meta P  | Meta $I^2$ | Meta Het. | P |
|-------------|-----|-----------|--------|------|---------------|-------------|---------------|-------------|--------------|---------|------------|-----------|---|
| rs11247009  | 12  | 132701184 | G/A    | P    | -0.02         | 0.016       | 0.002         | 0.0087      | -0.0028      | 0.72    | 29         | 0.24      |   |
| rs9581854   | 13  | 28017782  | C/T    | P    | -0.02         | 0.013       | -0.019        | 0.0065      | -0.019       | 0.0013  | 0          | 0.94      |   |
| rs1933437   | 13  | 28624294  | G/A    | P    | 0.022         | 0.01        | 0.0072        | 0.0051      | 0.01         | 0.024   | 41         | 0.19      |   |
| rs9595908   | 13  | 33184288  | T/C    | GG   | 0.012         | 0.01        | 0.019         | 0.0052      | 0.018        | 0.00012 | 0          | 0.54      |   |
| rs4477562   | 13  | 54104968  | C/T    | P    | -0.034        | 0.014       | -0.03         | 0.0072      | -0.031       | 1.1e-06 | 0          | 0.81      |   |
| rs9563576   | 13  | 58670147  | C/T    | GG   | 0.016         | 0.013       | 0.035         | 0.0065      | 0.031        | 5.3e-08 | 48         | 0.17      |   |
| rs2321882   | 13  | 59451989  | G/C    | P    | -0.053        | 0.012       | -0.028        | 0.0061      | -0.033       | 1e-09   | 72         | 0.061     |   |
| rs9540493   | 13  | 66205704  | A/G    | P    | 0.03          | 0.0097      | 0.014         | 0.005       | 0.017        | 0.00012 | 55         | 0.14      |   |
| rs1441264   | 13  | 79580919  | G/A    | P    | -0.035        | 0.01        | -0.017        | 0.0051      | -0.021       | 5.6e-06 | 60         | 0.11      |   |
| rs9634489   | 13  | 97049004  | A/G    | P    | -0.023        | 0.0097      | -0.017        | 0.0049      | -0.018       | 3.4e-05 | 0          | 0.6       |   |
| rs10132280  | 14  | 25928179  | C/A    | P    | 0.012         | 0.011       | 0.02          | 0.0056      | 0.019        | 0.00019 | 0          | 0.49      |   |
| rs974471    | 14  | 29685328  | G/A    | P    | -0.035        | 0.011       | -0.014        | 0.0058      | -0.019       | 0.00026 | 63         | 0.099     |   |
| rs12885454  | 14  | 29736838  | C/A    | P    | 0.032         | 0.01        | 0.015         | 0.0053      | 0.019        | 6.9e-05 | 52         | 0.15      |   |
| rs11847697  | 14  | 30515112  | C/T    | P    | -0.043        | 0.023       | -0.025        | 0.012       | -0.028       | 0.0059  | 0          | 0.48      |   |
| rs12895330  | 14  | 33305343  | G/C    | P    | -0.045        | 0.0098      | -0.016        | 0.005       | -0.022       | 5.8e-07 | 86         | 0.0072    |   |
| rs75766425  | 14  | 52511911  | G/C    | P    | -0.069        | 0.044       | 0.0078        | 0.03        | -0.016       | 0.51    | 52         | 0.15      |   |
| rs7141420   | 14  | 79899454  | C/T    | P    | -0.012        | 0.0096      | -0.017        | 0.0049      | -0.018       | 0.00023 | 0          | 0.61      |   |
| rs10150332  | 14  | 79936964  | T/C    | P    | -0.044        | 0.012       | -0.024        | 0.0062      | -0.028       | 5.5e-07 | 54         | 0.14      |   |
| rs3783890   | 14  | 93790276  | T/C    | P    | 0.016         | 0.012       | 0.015         | 0.0063      | 0.015        | 0.0056  | 0          | 0.98      |   |
| rs729050    | 14  | 94109502  | G/T    | P    | -0.011        | 0.011       | -0.024        | 0.0054      | -0.021       | 1.3e-05 | 19         | 0.27      |   |
| rs7161194   | 14  | 101529005 | A/G    | GG   | 0.0091        | 0.011       | 0.022         | 0.0055      | 0.02         | 6.1e-05 | 16         | 0.27      |   |
| rs1131877   | 14  | 103342049 | T/C    | P    | -0.012        | 0.011       | -0.024        | 0.0057      | -0.021       | 2.6e-05 | 0          | 0.33      |   |
| rs861539    | 14  | 104165753 | C/A    | P    | 0.021         | 0.011       | 0.0081        | 0.0053      | 0.011        | 0.025   | 13         | 0.28      |   |
| rs12440086  | 15  | 27038492  | C/A    | P    | -0.023        | 0.0098      | -0.011        | 0.005       | -0.013       | 0.0028  | 15         | 0.28      |   |
| rs149913955 | 15  | 39654281  | C/A    | P    | -0.1          | 0.15        | 0.041         | 0.067       | 0.017        | 0.78    | 0          | 0.39      |   |
| rs711906    | 15  | 40325691  | C/T    | P    | -0.017        | 0.017       | 0.0085        | 0.01        | 0.0017       | 0.84    | 37         | 0.21      |   |
| rs1559677   | 15  | 47738063  | A/G    | P    | -0.0007       | 0.0099      | -0.013        | 0.0051      | -0.011       | 0.019   | 21         | 0.26      |   |
| rs3736485   | 15  | 51748610  | A/G    | P    | 0.0016        | 0.01        | 0.0022        | 0.0051      | 0.002        | 0.65    | 0          | 0.96      |   |
| rs2593235   | 15  | 57541201  | C/A    | P    | 0.018         | 0.0098      | 0.0095        | 0.005       | 0.011        | 0.012   | 0          | 0.44      |   |
| rs17303831  | 15  | 62134332  | T/C    | P    | 0.042         | 0.022       | 0.028         | 0.013       | 0.032        | 0.0039  | 0          | 0.6       |   |
| rs12899850  | 15  | 66051299  | C/T    | GG   | 0.04          | 0.012       | 0.018         | 0.0064      | 0.023        | 5.9e-05 | 57         | 0.13      |   |
| rs11071896  | 15  | 66821250  | A/G    | P    | 0.016         | 0.011       | 0.0051        | 0.0057      | 0.0072       | 0.16    | 0          | 0.41      |   |
| rs4776970   | 15  | 68080886  | A/T    | P    | 0.016         | 0.0099      | 0.033         | 0.0051      | 0.029        | 1.9e-10 | 56         | 0.13      |   |
| rs2277598   | 15  | 73027478  | T/C    | P    | -0.018        | 0.01        | -0.011        | 0.0052      | -0.013       | 0.0058  | 0          | 0.57      |   |
| rs12593036  | 15  | 81058652  | A/G    | P    | 0.025         | 0.011       | 0.013         | 0.0055      | 0.016        | 0.0015  | 0          | 0.35      |   |
| rs7181659   | 15  | 95267483  | A/G    | P    | 0.01          | 0.0096      | 0.013         | 0.0049      | 0.012        | 0.0063  | 0          | 0.81      |   |
| rs11866815  | 16  | 387867    | C/T    | P    | 0.043         | 0.013       | 0.001         | 0.0066      | 0.0098       | 0.095   | 88         | 0.0039    |   |
| rs758747    | 16  | 3627358   | C/T    | P    | -0.012        | 0.012       | -0.0077       | 0.006       | -0.0087      | 0.1     | 0          | 0.73      |   |
| rs1053874   | 16  | 3707747   | G/A    | P    | -0.017        | 0.011       | 0.0026        | 0.0056      | -0.0016      | 0.74    | 63         | 0.1       |   |
| rs879620    | 16  | 4015729   | C/T    | P    | -0.025        | 0.012       | -0.027        | 0.0065      | -0.026       | 4.6e-06 | 0          | 0.9       |   |
| rs1049205   | 16  | 4942099   | C/T    | P    | 0.023         | 0.01        | 0.0089        | 0.0051      | 0.012        | 0.0091  | 39         | 0.2       |   |
| rs9302817   | 16  | 6163936   | T/G    | P    | 0.013         | 0.012       | 0.013         | 0.0062      | 0.013        | 0.019   | 0          | 0.99      |   |
| rs1136001   | 16  | 15131974  | G/T    | P    | -0.0064       | 0.01        | 0.014         | 0.0053      | 0.0099       | 0.037   | 68         | 0.076     |   |
| rs7190603   | 16  | 19928662  | T/C    | P    | 0.01          | 0.015       | 0.025         | 0.0075      | 0.022        | 0.0009  | 0          | 0.38      |   |
| rs11074446  | 16  | 20255123  | T/C    | P    | 0.024         | 0.013       | 0.026         | 0.0071      | 0.025        | 5.2e-05 | 0          | 0.92      |   |
| rs9652589   | 16  | 20370816  | C/T    | P    | 0.022         | 0.01        | 0.021         | 0.005       | 0.021        | 2.1e-06 | 0          | 0.94      |   |
| rs7195386   | 16  | 24578458  | T/C    | P    | 0.011         | 0.0098      | 0.012         | 0.005       | 0.012        | 0.0081  | 0          | 0.95      |   |
| rs2008514   | 16  | 28825605  | G/A    | P    | -0.019        | 0.01        | -0.026        | 0.0052      | -0.025       | 9.2e-08 | 0          | 0.5       |   |
| rs7204797   | 16  | 29968015  | C/T    | P    | -0.017        | 0.0099      | -0.022        | 0.0051      | -0.021       | 4.3e-06 | 0          | 0.69      |   |
| rs9925964   | 16  | 31129895  | A/G    | P    | 0.017         | 0.011       | 0.02          | 0.0054      | 0.02         | 4.1e-05 | 0          | 0.77      |   |
| rs2080454   | 16  | 49062590  | C/A    | P    | 0.031         | 0.01        | 0.0057        | 0.0052      | 0.011        | 0.018   | 80         | 0.026     |   |
| rs1564981   | 16  | 50986308  | G/A    | P    | -0.01         | 0.0098      | 0.0013        | 0.005       | -0.0011      | 0.8     | 8.4        | 0.3       |   |
| rs17795934  | 16  | 51926509  | C/T    | P    | -0.00056      | 0.011       | 0.006         | 0.0054      | 0.0046       | 0.34    | 0          | 0.58      |   |
| rs3213758   | 16  | 53639438  | C/T    | P    | 0.027         | 0.018       | 0.019         | 0.0099      | 0.021        | 0.015   | 0          | 0.72      |   |
| rs6499640   | 16  | 53769677  | G/A    | P    | -0.043        | 0.0099      | -0.022        | 0.0051      | -0.026       | 4.7e-09 | 70         | 0.068     |   |
| rs55872725  | 16  | 53809123  | C/T    | P    | -0.092        | 0.01        | -0.07         | 0.0051      | -0.075       | 3e-60   | 74         | 0.051     |   |
| rs113191842 | 16  | 53817318  | G/A    | P    | -0.081        | 0.02        | -0.065        | 0.0097      | -0.068       | 4.4e-15 | 0          | 0.49      |   |
| rs7187961   | 16  | 53826034  | T/C    | P    | -0.065        | 0.014       | -0.038        | 0.0065      | -0.043       | 1.5e-13 | 69         | 0.07      |   |
| rs2307022   | 16  | 68381978  | A/G    | P    | 0.0029        | 0.011       | -0.003        | 0.0053      | -0.0018      | 0.7     | 0          | 0.62      |   |
| rs889398    | 16  | 69556715  | C/T    | P    | 0.016         | 0.01        | 0.017         | 0.0051      | 0.017        | 0.00018 | 0          | 0.9       |   |
| rs61747555  | 16  | 71885423  | A/G    | P    | 0.022         | 0.012       | 0.017         | 0.0063      | 0.018        | 0.0013  | 0          | 0.71      |   |
| rs62051555  | 16  | 72830539  | C/G    | P    | 0.0095        | 0.028       | 0.012         | 0.014       | 0.011        | 0.36    | 0          | 0.95      |   |
| rs756717    | 16  | 72996162  | G/A    | P    | 0.022         | 0.01        | 0.017         | 0.0052      | 0.018        | 0.00012 | 0          | 0.63      |   |
| rs4788694   | 16  | 73070083  | C/G    | P    | 0.0082        | 0.01        | 0.0097        | 0.0051      | 0.0094       | 0.039   | 0          | 0.89      |   |
| rs455527    | 16  | 89644001  | T/C    | P    | 0.003         | 0.021       | 0.022         | 0.012       | 0.018        | 0.093   | 0          | 0.43      |   |
| rs2281727   | 17  | 2117945   | A/G    | P    | -0.0052       | 0.01        | 0.0001        | 0.0052      | -0.00098     | 0.83    | 0          | 0.64      |   |
| rs1885987   | 17  | 2203025   | T/G    | P    | 0.0086        | 0.01        | -0.0027       | 0.0052      | -0.00041     | 0.93    | 0          | 0.32      |   |
| rs35400274  | 17  | 4803711   | G/A    | P    | -0.012        | 0.014       | -0.015        | 0.0074      | -0.014       | 0.029   | 0          | 0.85      |   |
| rs3026101   | 17  | 5280440   | T/C    | P    | -0.032        | 0.01        | -0.018        | 0.0053      | -0.021       | 8.4e-06 | 32         | 0.22      |   |
| rs4925114   | 17  | 17711270  | A/G    | P    | 0.008         | 0.011       | 0.0011        | 0.0055      | 0.0025       | 0.61    | 0          | 0.57      |   |
| rs203462    | 17  | 19812541  | T/C    | P    | 0.0014        | 0.01        | 0.0043        | 0.0051      | 0.0037       | 0.42    | 0          | 0.8       |   |
| rs4986044   | 17  | 21261560  | C/T    | P    | 0.014         | 0.012       | 0.012         | 0.0065      | 0.013        | 0.028   | 0          | 0.88      |   |
| rs17826219  | 17  | 29161845  | G/A    | P    | -0.012        | 0.015       | -0.0083       | 0.0079      | -0.0092      | 0.19    | 0          | 0.82      |   |
| rs12150665  | 17  | 34914787  | T/C    | P    | 0.039         | 0.01        | 0.016         | 0.0051      | 0.021        | 3.5e-06 | 75         | 0.045     |   |
| rs11658063  | 17  | 36103872  | C/G    | P    | 0.0016        | 0.01        | -0.0017       | 0.0051      | -0.001       | 0.83    | 0          | 0.77      |   |
| rs11652097  | 17  | 45316717  | C/T    | P    | -0.02         | 0.01        | -0.012        | 0.0051      | -0.014       | 0.0023  | 0          | 0.49      |   |
| rs1808192   | 17  | 45794706  | A/G    | P    | 0.023         | 0.011       | 0.02          | 0.0057      | 0.02         | 5e-05   | 0          | 0.77      |   |
| rs6504108   | 17  | 46292923  | C/T    | P    | 0.013         | 0.011       | 0.011         | 0.0055      | 0.011        | 0.021   | 0          | 0.85      |   |
| rs7406910   | 17  | 46688256  | T/C    | P    | -0.022        | 0.016       | -0.0029       | 0.0085      | -0.0071      | 0.35    | 12         | 0.29      |   |
| rs17631394  | 17  | 61646000  | G/A    | P    | -0.013        | 0.012       | 0.014         | 0.0058      | 0.0085       | 0.1     | 75         | 0.046     |   |
| rs4790981   | 17  | 65921834  | A/G    | P    | -0.034        | 0.011       | -0.017        | 0.006       | -0.021       | 7.7e-05 | 44         | 0.18      |   |
| rs312750    | 17  | 68343539  | G/A    | P    | -0.0014       | 0.0098      | -0.0088       | 0.005       | -0.0073      | 0.1     | 0          | 0.5       |   |
| rs3760128   | 17  | 73886888  | A/G    | P    | -0.011        | 0.011       | -0.013        | 0.0054      | -0.012       | 0.01    | 0          | 0.86      |   |
| rs4889891   | 17  | 77768654  | C/A    | P    | 0.0098        | 0.012       | 0.0073        | 0.0061      | 0.0078       | 0.15    | 0          | 0.85      |   |
| rs12939549  | 17  | 78611724  | A/G    | P    | 0.024         | 0.0099      | 0.012         | 0.005       | 0.014        | 0.0013  | 16         | 0.28      |   |
| rs1788799   | 18  | 21124945  | C/G    | P    | 0.033         | 0.011       | 0.017         | 0.0054      | 0.02         | 3.2e-05 | 49         | 0.16      |   |
| rs1805081   | 18  | 21140432  | T/C    | P    | 0.023         | 0.01        | 0.018         | 0.0051      | 0.019        | 3.3e-05 | 0          | 0.67      |   |
| rs11081818  | 18  | 31251088  | G/A    | GG   | -0.024        | 0.0099      | -0.021        | 0.005       | -0.021       | 1.8e-06 | 0          | 0.75      |   |
| rs9304204   | 18  | 36896003  | A/G    | P    | 0.00095       | 0.013       | -0.0096       | 0.0065      | -0.0074      | 0.2     | 0          | 0.46      |   |
| rs7239883   | 18  | 40147671  | G/A    | P    | 0.017         | 0.01        | 0.015         | 0.0052      | 0.016        | 0.00065 | 0          | 0.85      |   |
| rs1518142   | 18  | 40721490  | G/A    | P    | 0.0098        | 0.0098      | 0.017         | 0.005       | 0.016        | 0.00039 | 0          | 0.49      |   |
| rs4129322   | 18  | 50605642  | G/A    | P    | -0.0049       | 0.015       | 0.0091        | 0.0082      | 0.006        | 0.41    | 0          | 0.42      |   |
| rs7243785   | 18  | 52475162  | A/G    | P    | -0.019        | 0.011       | -0.015        | 0.0058      | -0.016       | 0.0021  | 0          | 0.72      |   |
| rs7243357   | 18  | 56883319  | T/G    | P    | 0.00065       | 0.013       | 0.0026        | 0.00        |              |         |            |           |   |

| SNP        | Chr | Pos       | Allele | Type | $\beta_{<50}$ | SE $_{<50}$ | $\beta_{>50}$ | SE $_{>50}$ | Meta $\beta$ | Meta P  | Meta $I^2$ | Meta Het. P |
|------------|-----|-----------|--------|------|---------------|-------------|---------------|-------------|--------------|---------|------------|-------------|
| rs17751061 | 19  | 19413092  | C/T    | P    | 0.042         | 0.015       | 0.018         | 0.0071      | 0.022        | 0.00048 | 54         | 0.14        |
| rs17513613 | 19  | 30286822  | T/C    | P    | -0.005        | 0.011       | -0.012        | 0.0054      | -0.011       | 0.028   | 0          | 0.56        |
| rs4805566  | 19  | 30918316  | T/A    | P    | -0.011        | 0.01        | -0.0028       | 0.0052      | -0.0046      | 0.32    | 0          | 0.46        |
| rs33439    | 19  | 30945171  | C/T    | P    | -0.0079       | 0.0099      | -0.0089       | 0.005       | -0.0087      | 0.053   | 0          | 0.93        |
| rs29943    | 19  | 34308210  | T/C    | P    | -0.019        | 0.01        | -0.0094       | 0.0053      | -0.011       | 0.016   | 0          | 0.39        |
| rs2075650  | 19  | 45395619  | A/G    | P    | 0.012         | 0.014       | 0.025         | 0.007       | 0.022        | 0.00039 | 0          | 0.4         |
| rs11671664 | 19  | 46172278  | G/A    | P    | 0.0029        | 0.015       | 0.018         | 0.0082      | 0.014        | 0.047   | 0          | 0.39        |
| rs2287019  | 19  | 46202172  | C/T    | P    | 0.032         | 0.014       | 0.021         | 0.007       | 0.023        | 0.0002  | 0          | 0.46        |
| rs3810291  | 19  | 47569003  | G/A    | P    | -0.017        | 0.011       | -0.021        | 0.0057      | -0.02        | 7.1e-05 | 0          | 0.78        |
| rs4802349  | 19  | 47874510  | G/T    | P    | 0.0039        | 0.014       | -0.0035       | 0.0076      | -0.0018      | 0.79    | 0          | 0.64        |
| rs2075803  | 19  | 51628529  | A/G    | P    | -0.03         | 0.011       | -0.0064       | 0.0056      | -0.011       | 0.023   | 73         | 0.055       |
| rs1884897  | 20  | 6612832   | A/G    | P    | -0.019        | 0.01        | -0.018        | 0.0052      | -0.018       | 0.00013 | 0          | 0.88        |
| rs175804   | 20  | 15832299  | A/T    | P    | 0.011         | 0.016       | 0.011         | 0.0079      | 0.011        | 0.12    | 0          | 0.99        |
| rs16978956 | 20  | 18288165  | A/G    | P    | -0.039        | 0.012       | -0.0095       | 0.0059      | -0.015       | 0.0035  | 80         | 0.025       |
| rs34099160 | 20  | 18295730  | C/T    | P    | -0.044        | 0.017       | -0.012        | 0.009       | -0.019       | 0.017   | 63         | 0.1         |
| rs2076559  | 20  | 25187213  | G/A    | P    | 0.0048        | 0.01        | -0.012        | 0.0053      | -0.0081      | 0.086   | 49         | 0.16        |
| rs6050446  | 20  | 25195509  | A/G    | P    | -0.017        | 0.033       | -0.065        | 0.015       | -0.057       | 5.4e-05 | 42         | 0.19        |
| rs6142096  | 20  | 32686658  | G/A    | GG   | -0.033        | 0.0098      | -0.013        | 0.005       | -0.017       | 0.00011 | 68         | 0.077       |
| rs6013029  | 20  | 36399580  | G/T    | P    | 4e-05         | 0.021       | -0.027        | 0.011       | -0.021       | 0.028   | 23         | 0.26        |
| rs6091540  | 20  | 51087862  | C/T    | P    | 0.015         | 0.011       | 0.034         | 0.0055      | 0.03         | 1e-09   | 57         | 0.13        |
| rs2243930  | 20  | 54147462  | G/A    | P    | -0.0089       | 0.011       | -0.024        | 0.0059      | -0.021       | 6e-05   | 31         | 0.23        |
| rs11908421 | 20  | 54379667  | T/C    | P    | 0.014         | 0.012       | 0.0066        | 0.0063      | 0.0081       | 0.15    | 0          | 0.6         |
| rs6089584  | 20  | 60564086  | C/C    | P    | -0.004        | 0.01        | 0.006         | 0.0053      | 0.0039       | 0.4     | 0          | 0.39        |
| rs9983113  | 21  | 40315316  | C/T    | P    | 0.049         | 0.0099      | 0.014         | 0.005       | 0.021        | 3e-06   | 90         | 0.0013      |
| rs427943   | 21  | 46570896  | A/C    | P    | -0.031        | 0.0099      | -0.0033       | 0.0051      | -0.009       | 0.047   | 83         | 0.014       |
| rs17759796 | 22  | 22190163  | C/A    | GG   | -0.031        | 0.015       | -0.02         | 0.0073      | -0.022       | 0.0007  | 0          | 0.49        |
| rs4820408  | 22  | 40604945  | T/G    | P    | 0.016         | 0.01        | 0.018         | 0.0051      | 0.018        | 9.3e-05 | 0          | 0.88        |
| rs5758651  | 22  | 42609148  | T/C    | P    | 0.019         | 0.012       | 0.0029        | 0.006       | 0.0063       | 0.24    | 32         | 0.22        |
| rs56330886 | 22  | 50493427  | T/G    | P    | 0.058         | 0.05        | 0.0089        | 0.028       | 0.02         | 0.4     | 0          | 0.39        |
| rs1379871  | 23  | 31854782  | C/C    | P    | -0.02         | 0.009       | -0.0094       | 0.0044      | -0.011       | 0.0035  | 15         | 0.28        |
| rs6529684  | 23  | 53542107  | A/G    | P    | -0.031        | 0.0088      | -0.024        | 0.0043      | -0.025       | 3.4e-11 | 0          | 0.51        |
| rs11539157 | 23  | 68381264  | C/A    | P    | 0.023         | 0.011       | 0.012         | 0.0051      | 0.014        | 0.0035  | 0          | 0.33        |
| rs3121672  | 23  | 117916370 | T/C    | P    | -0.025        | 0.011       | -0.025        | 0.0054      | -0.025       | 1.8e-07 | 0          | 0.98        |
| rs1190736  | 23  | 136113464 | C/A    | P    | 0.0063        | 0.0087      | 0.0053        | 0.0042      | 0.0055       | 0.15    | 0          | 0.91        |
| rs5945324  | 23  | 152894551 | G/C    | P    | -0.0098       | 0.013       | 0.0073        | 0.0069      | 0.0037       | 0.55    | 23         | 0.25        |

**Table S10. BMI-associated variants annotation.** Type is GERA-identified (G), or GERA+GIANT-identified (GG). GTEx eQTLs have the first two letters in each word for the tissue types. RegulomeDB scores - 1: Likely to affect binding + eQTL expression; 2: Likely to affect binding; 3: Less likely to affect binding. 4: Minimal binding evidence

chr3:77646862:D, 3:77646862, G  
eQTL:  
eQTL ( $r^2$ ):  
RegulomeDB Score: 6  
RegulomeDB bound protein:

rs513357, 6:69558698, G  
eQTL:  
eQTL ( $r^2$ ):  
RegulomeDB Score: 7  
RegulomeDB bound protein:

rs7938308, 11:13320533, G  
eQTL: ARNTL(WhBl)  
eQTL ( $r^2$ ): ARNTL(WhBl)  
RegulomeDB Score: 2c  
RegulomeDB bound protein: CTCF, EP300, GATA2, GATA3, RAD21

rs1074657, 1:243746634, GG  
eQTL:  
eQTL ( $r^2$ ):  
RegulomeDB Score: 5  
RegulomeDB bound protein:

rs1396141, 2:41673745, GG  
eQTL:  
eQTL ( $r^2$ ):  
RegulomeDB Score: 7  
RegulomeDB bound protein:

rs7580766, 2:42939351, GG  
eQTL: HAAO(BrNuabaga, NeTi, WhBl), OXER1(WhBl)  
eQTL ( $r^2$ ): FTOP1(BrCeHe), HAAO(BrNuabaga, NeTi, WhBl), OXER1(WhBl), COX7A2L(EsMu, SkNoSuExSu, SkSuExLole, Te)  
RegulomeDB Score: 5  
RegulomeDB bound protein: POLR2A

rs6710871, 2:143960593, GG  
eQTL:  
eQTL ( $r^2$ ):  
RegulomeDB Score: 6  
RegulomeDB bound protein:

rs4857968, 3:20714580, GG  
eQTL:  
eQTL ( $r^2$ ):  
RegulomeDB Score: 5  
RegulomeDB bound protein:

rs1436351, 3:104617973, GG  
eQTL:  
eQTL ( $r^2$ ):  
RegulomeDB Score: 7  
RegulomeDB bound protein:

rs4833079, 4:38654681, GG  
eQTL: RP11-617D20.1(ArTi, EsMu), AC021860.1(EsMu)  
eQTL ( $r^2$ ): RP11-617D20.1(ArTi, EsMu), AC021860.1(EsMu)  
RegulomeDB Score: 5  
RegulomeDB bound protein:

rs10019997, 4:137048599, GG  
eQTL:  
eQTL ( $r^2$ ):  
RegulomeDB Score: 7  
RegulomeDB bound protein:

rs7730898, 5:170459675, GG  
eQTL: RANBP17(EsMu, Li), CTC-455F18.3(Te)  
eQTL ( $r^2$ ): RANBP17(EsMu, Li, SkSuExLole, BrCabaga), CTC-455F18.3(Te, ArTi)  
RegulomeDB Score: 5  
RegulomeDB bound protein:

rs947612, 6:73738661, GG  
eQTL:  
eQTL ( $r^2$ ):

RegulomeDB Score: 5  
RegulomeDB bound protein:

rs901630, 6:98539519, GG  
eQTL:  
eQTL ( $r^2$ ):  
RegulomeDB Score: 5  
RegulomeDB bound protein:

rs6569648, 6:130349119, GG  
eQTL: L3MBTL3(AdSu, AdvOm, ArAo, ArTi, BrMaTi, CoSi, CoTr, EsMu, Li, Lu, NeTi, Pa, Pi, Pr, SkNoSuExSu, SkSuExLole, SmInTeIl, Sp, St, Te, Th, WhBl), RP11-73O6.3(BrMaTi, CoTr, Li, Lu, NeTi, SkSuExLole, SmInTeIl, Sp, Th, WhBl)  
eQTL ( $r^2$ ): L3MBTL3(AdSu, AdvOm, ArAo, ArTi, BrMaTi, CeEBly, CoTr, EsMu, HeLeVe, Li, Lu, NeTi, Pa, Pi, Pr, SkNoSuExSu, SkSuExLole, SmInTeIl, Sp, St, Te, Th, WhBl), RP11-73O6.3(AdSu, AdvOm, BrMaTi, CoTr, Li, Lu, NeTi, Pa, Pi, SkSuExLole, SmInTeIl, Sp, St, Th, WhBl)  
RegulomeDB Score: 1f  
RegulomeDB bound protein:

rs9364687, 6:163817911, GG  
eQTL:  
eQTL ( $r^2$ ):  
RegulomeDB Score: 4  
RegulomeDB bound protein: POU5F1, RBBP5

rs6471932, 8:62078904, GG  
eQTL:  
eQTL ( $r^2$ ):  
RegulomeDB Score: 7  
RegulomeDB bound protein:

rs12352785, 9:6956850, GG  
eQTL:  
eQTL ( $r^2$ ):  
RegulomeDB Score: 5  
RegulomeDB bound protein:

rs118067556, 10:63136165, GG  
eQTL:  
eQTL ( $r^2$ ):  
RegulomeDB Score: 5  
RegulomeDB bound protein: GATA6

rs10742752, 11:45438374, GG  
eQTL: PRDM11(Th)  
eQTL ( $r^2$ ):  
RegulomeDB Score: 6  
RegulomeDB bound protein:

rs11170468, 12:39430048, GG  
eQTL:  
eQTL ( $r^2$ ):  
RegulomeDB Score: 4  
RegulomeDB bound protein: TCF7L2, TRIM28

rs1819844, 12:68205604, GG  
eQTL:  
eQTL ( $r^2$ ):  
RegulomeDB Score: 5  
RegulomeDB bound protein: MYC

rs2372716, 12:99573426, GG  
eQTL:  
eQTL ( $r^2$ ):  
RegulomeDB Score: 6  
RegulomeDB bound protein:

rs9595908, 13:33184288, GG  
eQTL: N4BP2L2(ArAo), SNORA16(SkSuExLole, Sp, WhBl)  
eQTL ( $r^2$ ): N4BP2L2(ArAo, EsMu), SNORA16(SkSuExLole, WhBl, Sp, BrCe, BrCeHe, Th), RP11-298P3.4(ArTi, SkSuExLole)  
RegulomeDB Score: 1f  
RegulomeDB bound protein:

rs9563576, 13:58670147, GG  
eQTL:  
eQTL ( $r^2$ ):  
RegulomeDB Score: 6  
RegulomeDB bound protein:

rs7161194, 14:101529005, GG  
eQTL:  
eQTL ( $r^2$ ):  
RegulomeDB Score: 2b  
RegulomeDB bound protein: JUN, POLR2A

**rs12899850**, 15:66051299, GG  
**eQTL**: IGDCC4(BrCeHe, BrCe), DENND4A(CeTrfi), PTPLAD1(Te)  
**eQTL** ( $r^2$ ): IGDCC4(BrCeHe, BrCe, MuSk), DENND4A(CeTrfi, Te), PTPLAD1(Te)  
**RegulomeDB Score**: 5  
**RegulomeDB bound protein**: MAFF

**rs11081818**, 18:31251088, GG  
**eQTL**:  
**eQTL** ( $r^2$ ):  
**RegulomeDB Score**: 5  
**RegulomeDB bound protein**:

**rs6142096**, 20:32686658, GG  
**eQTL**: MAP1LC3A(ArAo, CoTr, Th), RP1-64K7.4(Lu), ASIP(NeTi)  
**eQTL** ( $r^2$ ): MAP1LC3A(CoTr, Th, ArAo), RP1-64K7.4(Lu), ASIP(NeTi)  
**RegulomeDB Score**: 5  
**RegulomeDB bound protein**:

**rs17759796**, 22:22190163, GG  
**eQTL**: LL22NC03-86G7.1(AdSu, Lu, NeTi, Th), PPM1F(BrCeHe, BrCe), TOP3B(BrCeHe, BrCe)  
**eQTL** ( $r^2$ ): LL22NC03-86G7.1(AdSu, Lu, NeTi, Th, EsMu, SkSuExLole), PPM1F(BrCeHe, BrCe), TOP3B(BrCeHe, BrCe)  
**RegulomeDB Score**: 7  
**RegulomeDB bound protein**:

**Table S11. BMI x age pairwise heritability interactions.**

| Group               | $h_g^2$              | $P_g$   | $h_{ge}^2$            | $P_{ge}$ |
|---------------------|----------------------|---------|-----------------------|----------|
| <52 vs. 52-59       | 0.306 (0.253, 0.358) | 3.8e-30 | 0.078 (0.008, 0.149)  | 0.029    |
| <52 vs. 60-65       | 0.301 (0.249, 0.353) | 1.4e-29 | 0.065 (-0.005, 0.135) | 0.07     |
| <52 vs. 66-72       | 0.254 (0.201, 0.308) | 2e-20   | 0.102 (0.029, 0.174)  | 0.0062   |
| <52 vs. $\geq 73$   | 0.261 (0.210, 0.313) | 2.2e-23 | 0.076 (0.007, 0.145)  | 0.031    |
| 52-59 vs. 60-65     | 0.300 (0.250, 0.350) | 8.1e-32 | 0.014 (-0.052, 0.080) | 0.68     |
| 52-59 vs. 66-72     | 0.283 (0.234, 0.332) | 8.9e-30 | 0.017 (-0.046, 0.079) | 0.6      |
| 52-59 vs. $\geq 73$ | 0.257 (0.207, 0.306) | 3e-24   | 0.041 (-0.026, 0.107) | 0.23     |
| 60-65 vs. 66-72     | 0.278 (0.228, 0.327) | 3.6e-28 | 0.007 (-0.057, 0.070) | 0.83     |
| 60-65 vs. $\geq 73$ | 0.229 (0.179, 0.278) | 1.9e-19 | 0.055 (-0.012, 0.122) | 0.11     |
| 66-72 vs. $\geq 73$ | 0.277 (0.229, 0.325) | 1.2e-29 | 0.000 (-0.060, 0.060) | 1        |

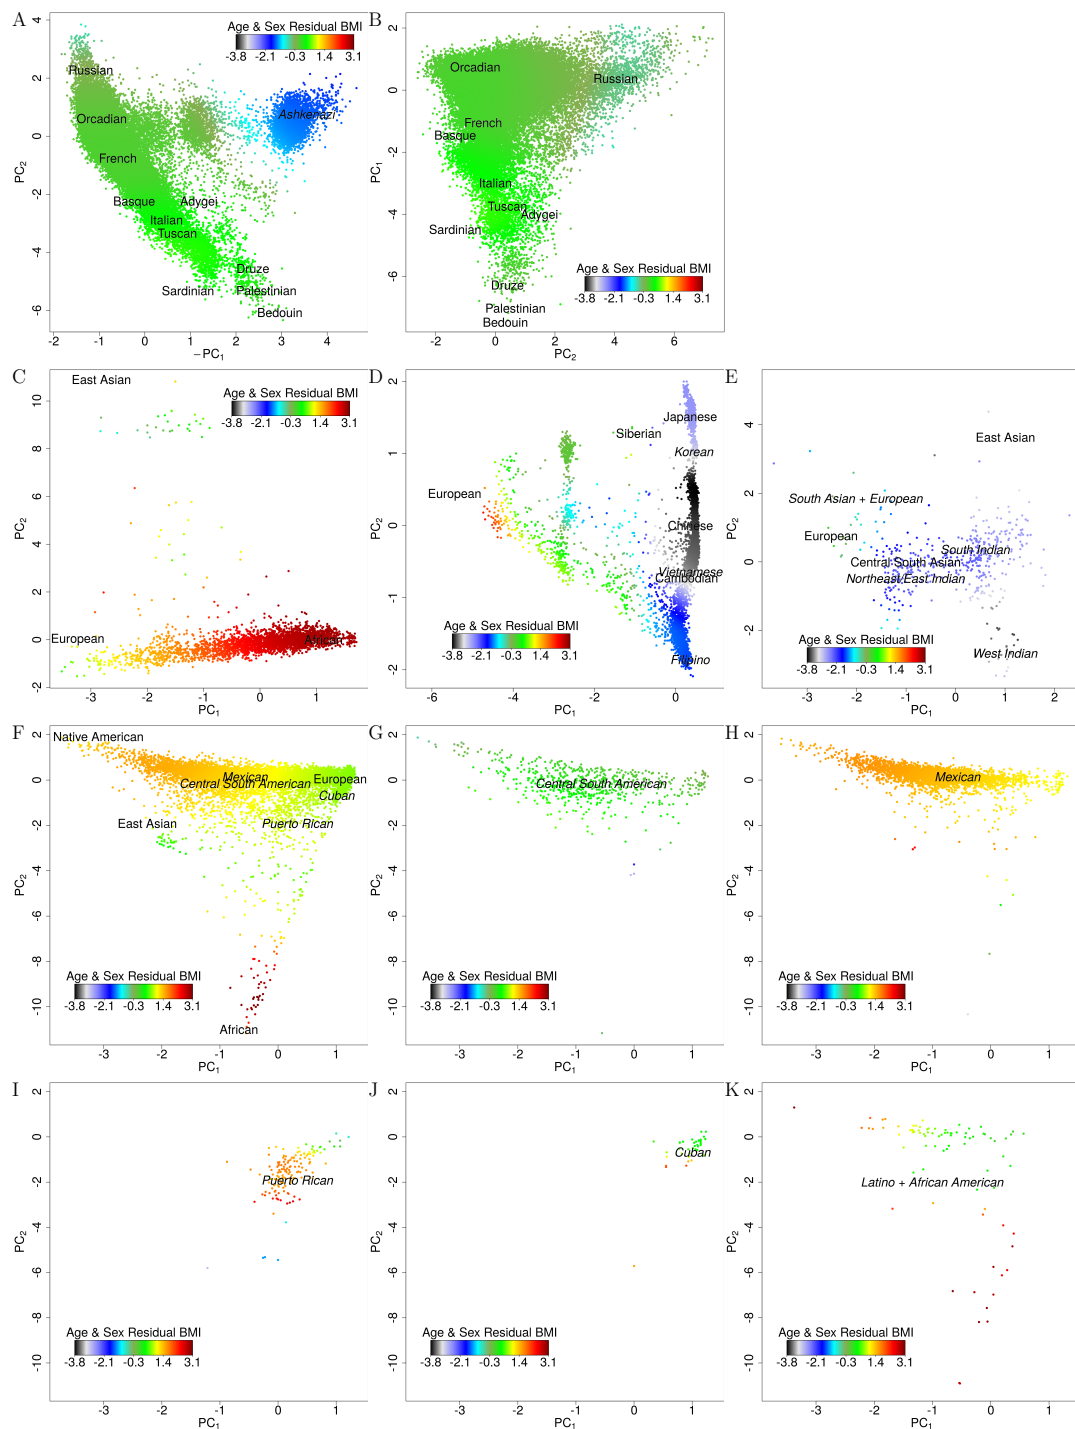

**Figure S1. Age- and sex-adjusted BMI distribution in GERA ethnicity groups using the first calendar year measurement.** The residual phenotype distribution was smoothed over the PCs (within the individuals in each respective figure), which were divided by their standard deviation for interpretability (see Methods). Human Genome Diversity Project populations are in a plain font, and GERA populations are in an italics font. (A) Non-Hispanic Whites including individuals with Ashkenazi ancestry (n=81,377); (B) Non-Hispanic Whites excluding individuals with Ashkenazi ancestry (n=76,088); (C) African Americans (n=3,069); (D) East Asians excluding Indo Fijians (n=7,235); (E) South Asians (n=459); (F) Latinos (n=8,322); (G) Latinos - Central South American (n=612); (H) Latinos - Mexican (n=3,048); (I) Latinos - Puerto Rican (n=148); (J) Latinos - Cuban (n=40); (K) Latinos - reporting Latino and African American (n=112).

A

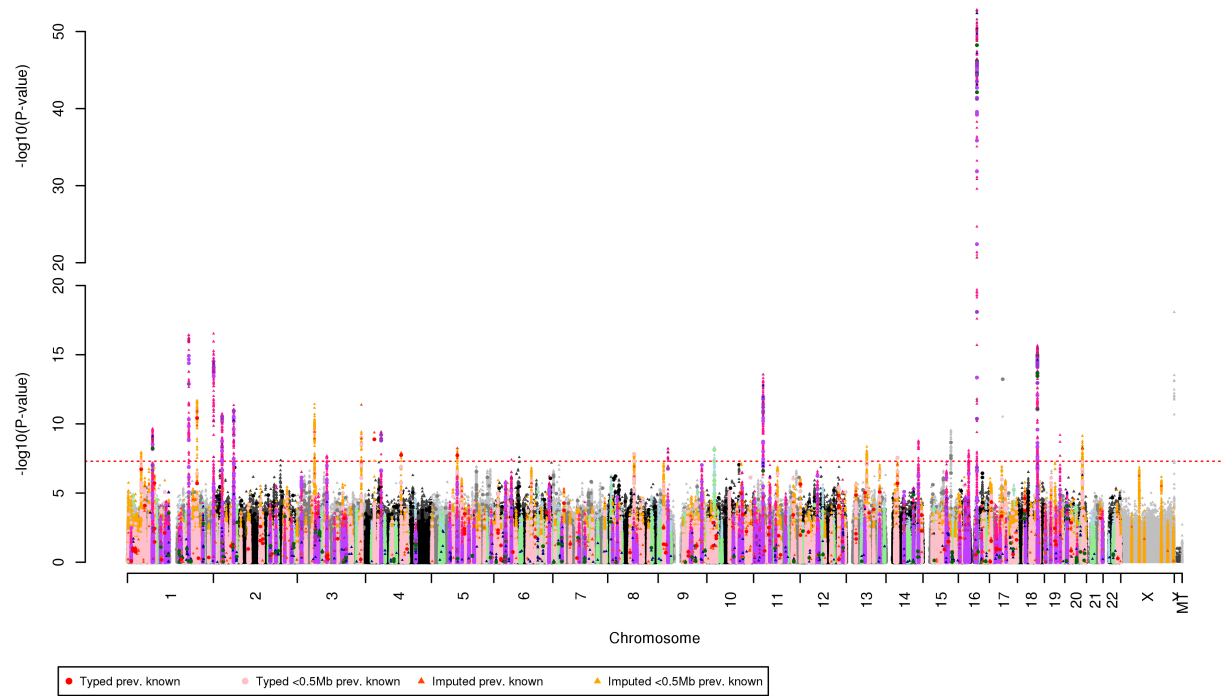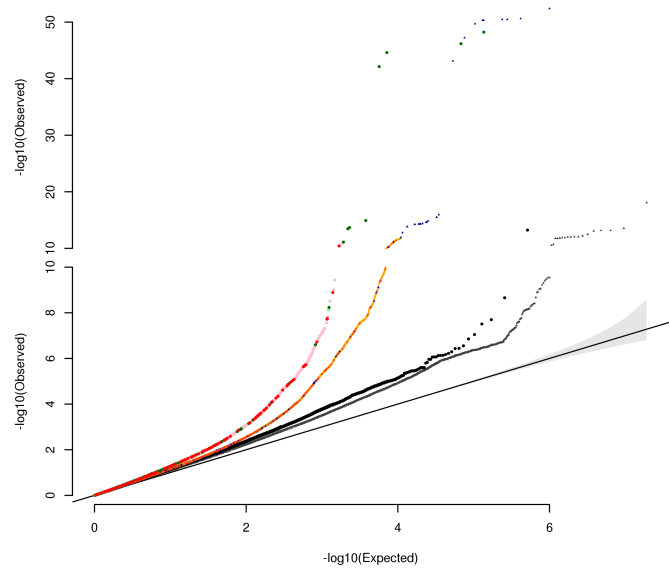

B

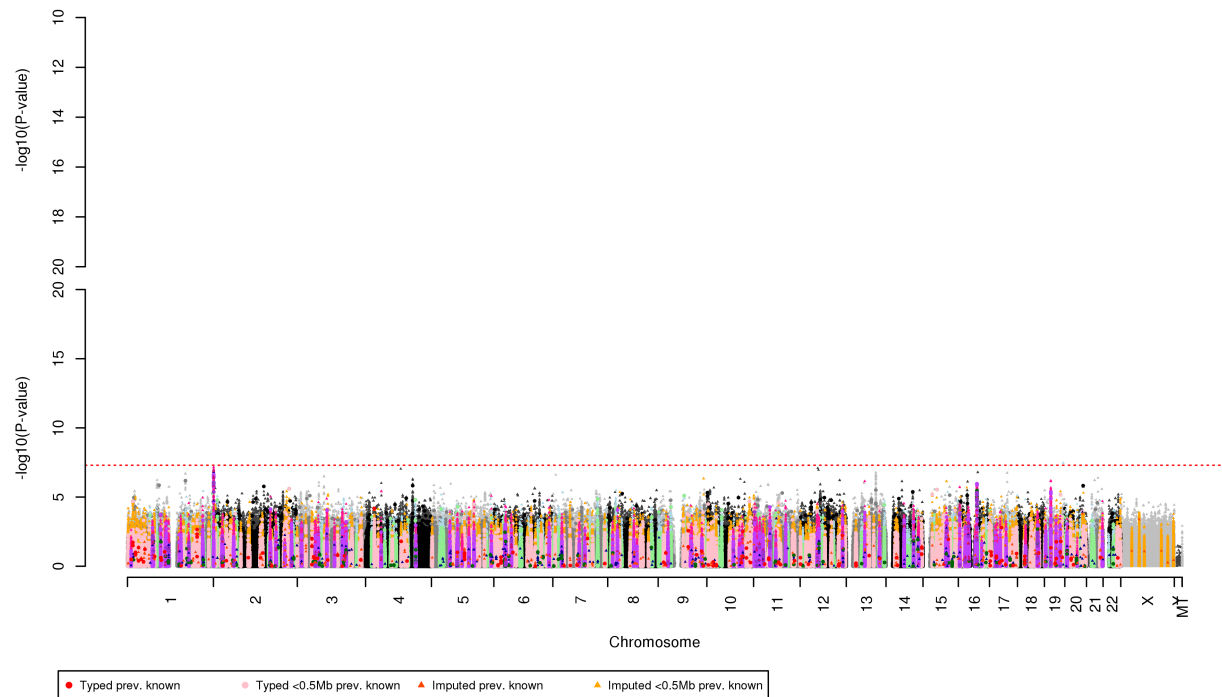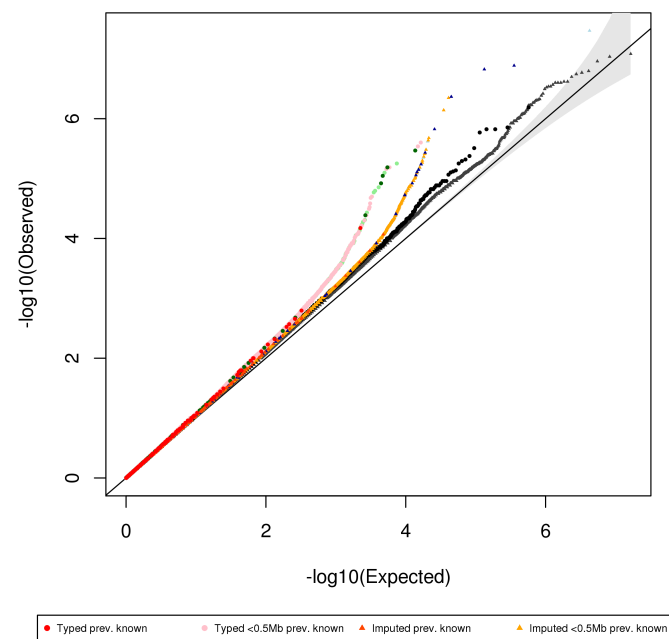

C

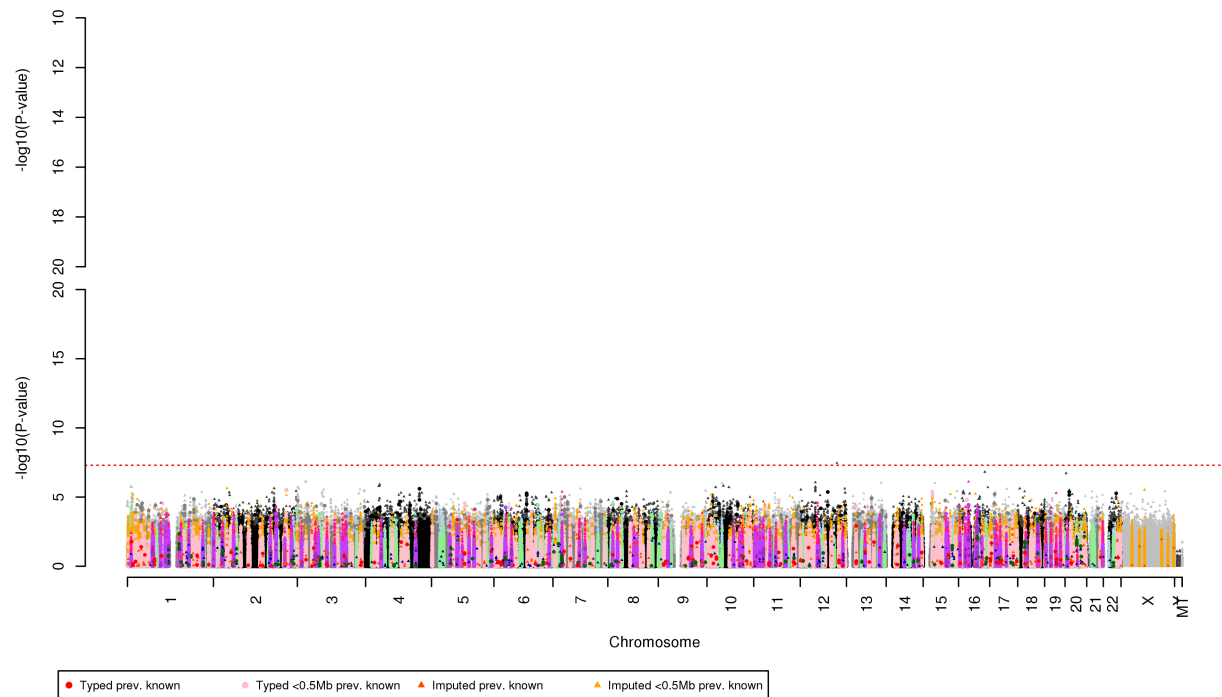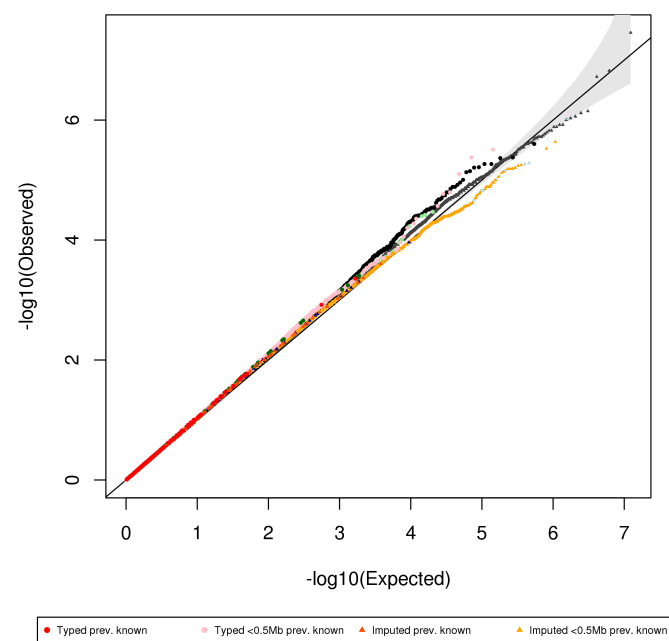

D

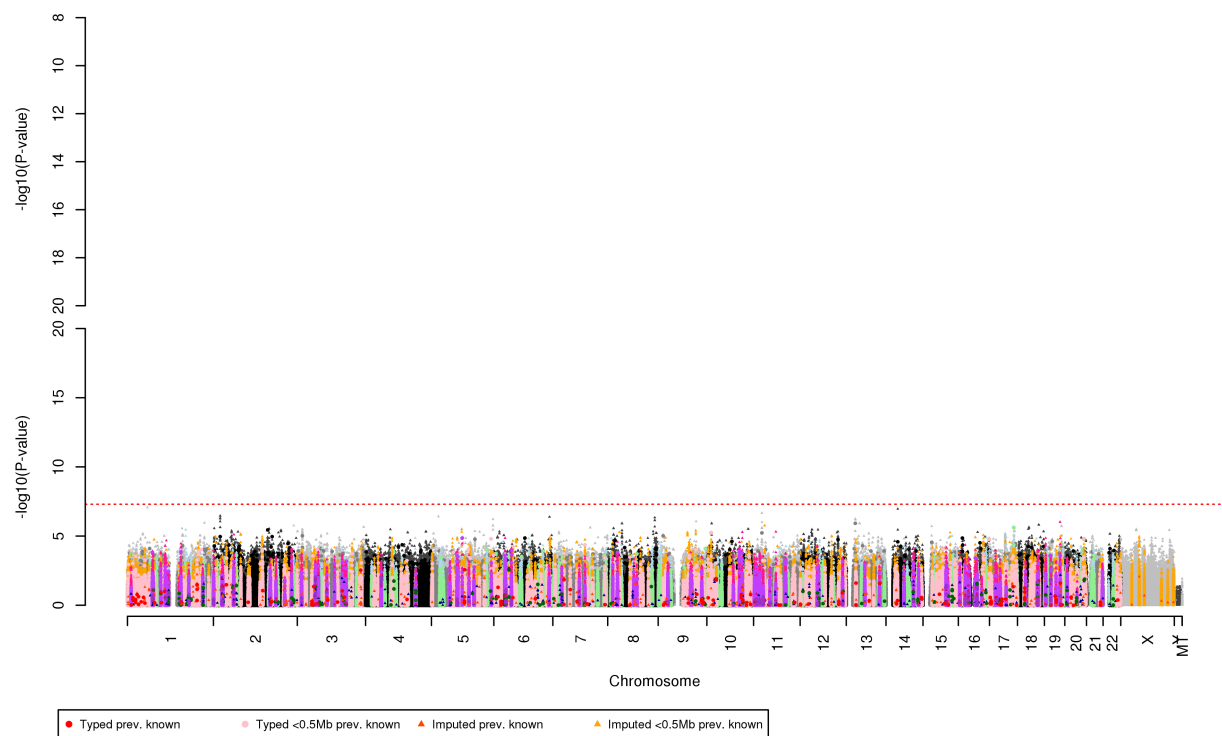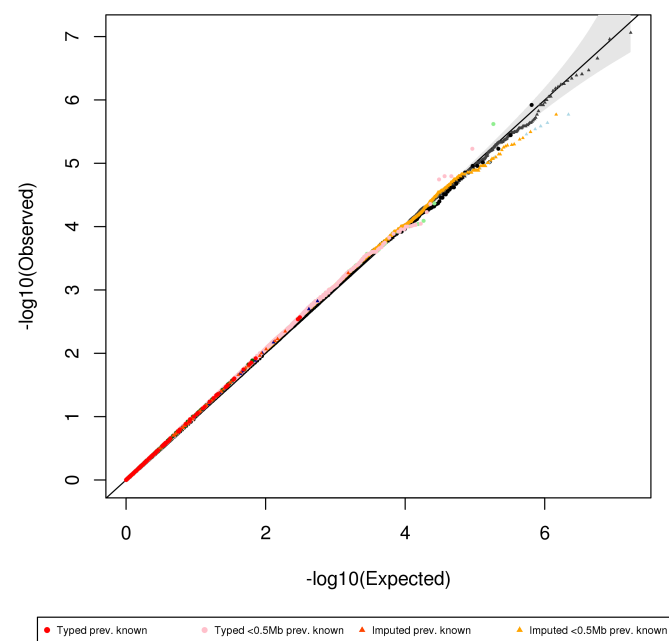

**E**

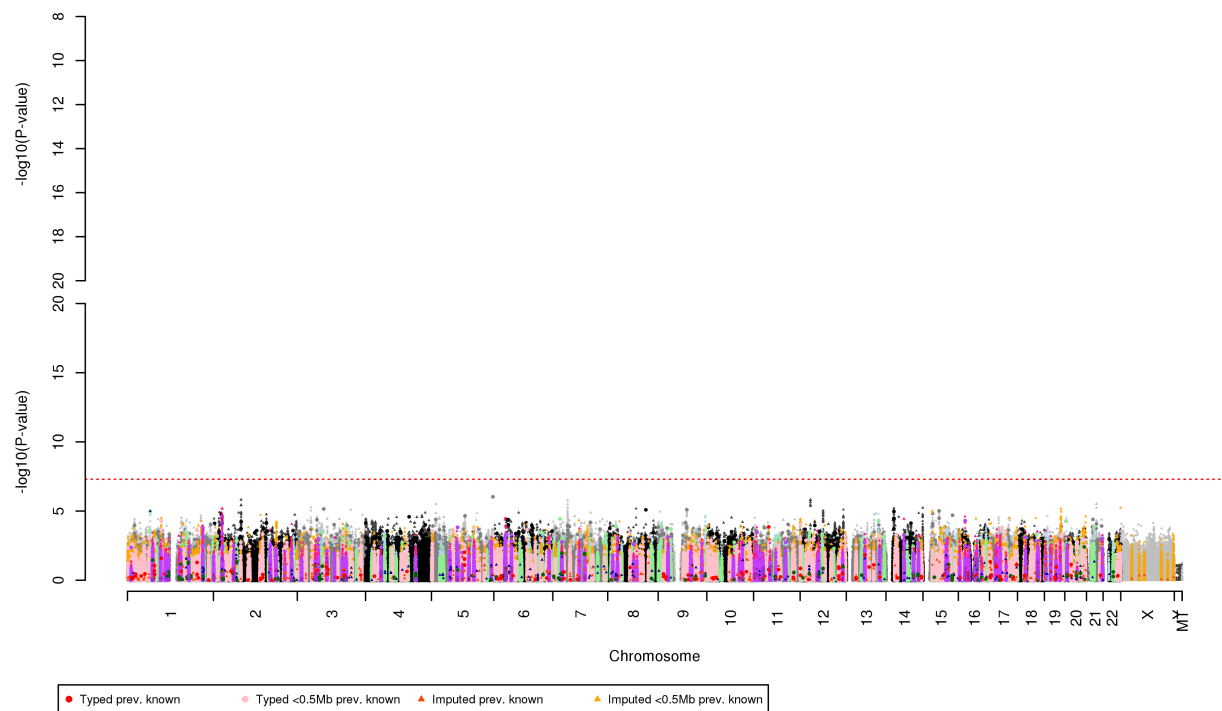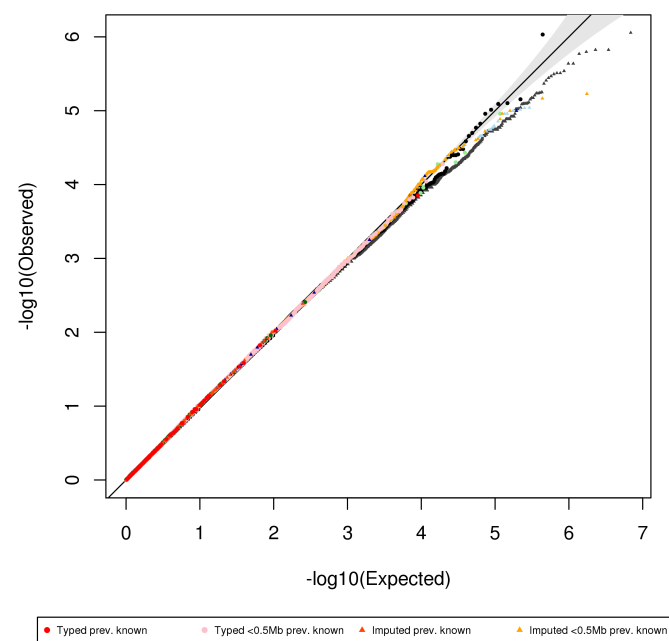

**F**

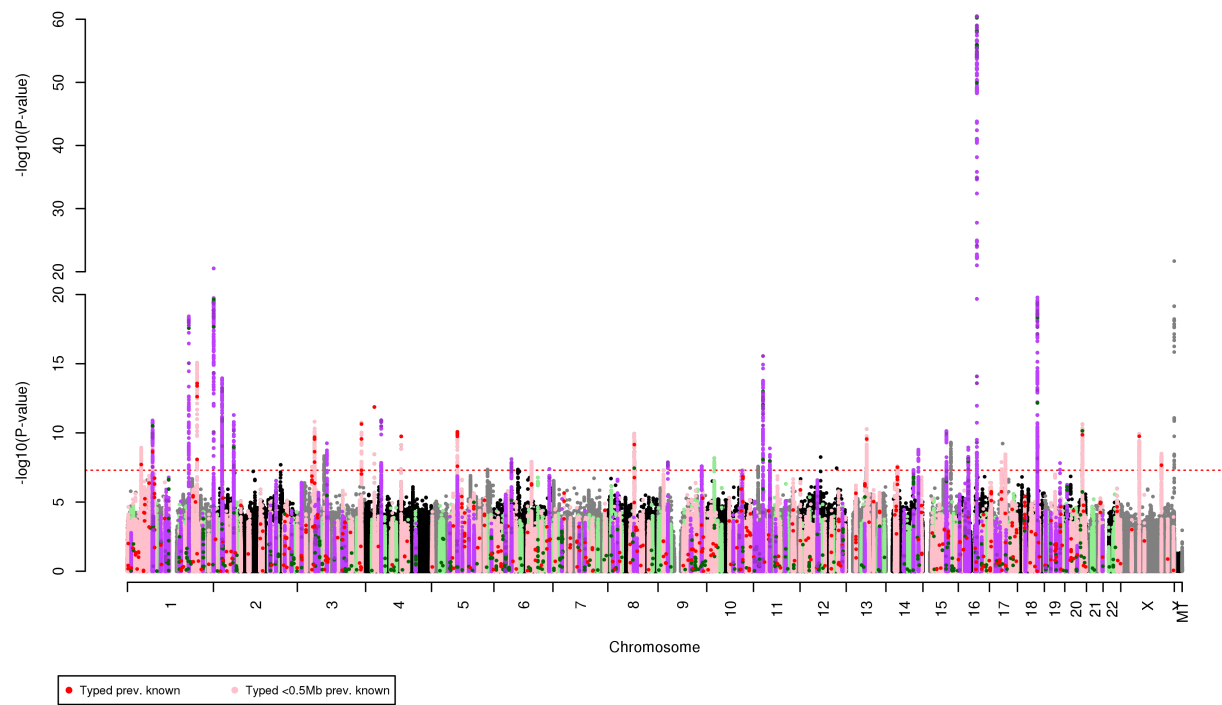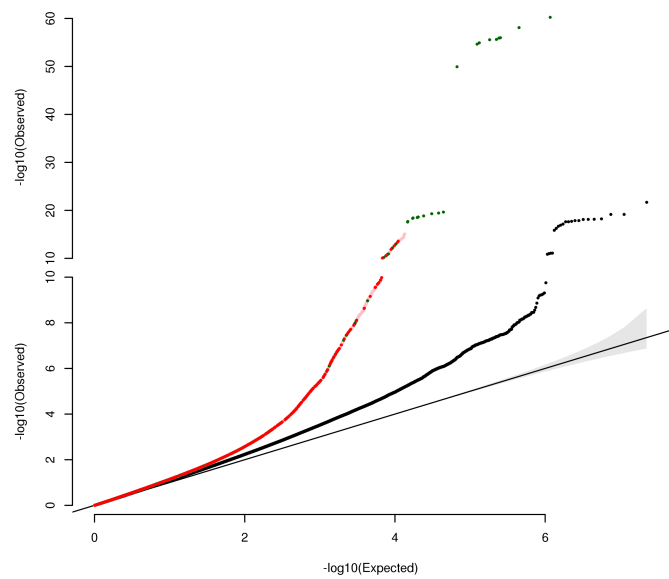

G

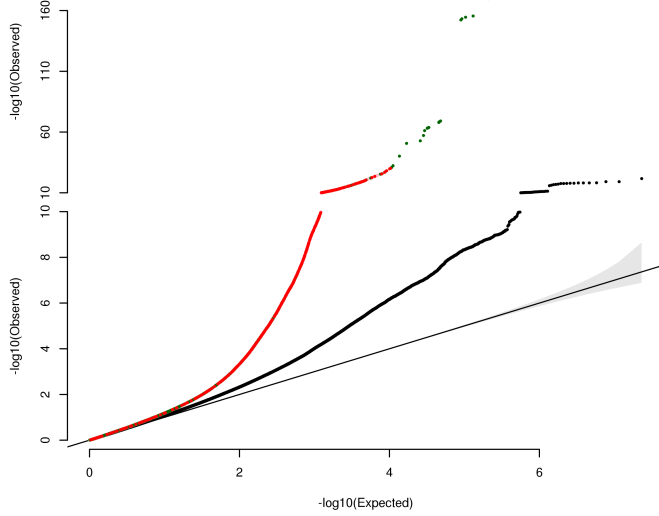

**Figure S2. Manhattan plots and Q-Q plots.** Plots of each ethnicity, of the GERA meta-analysis, and of the GERA+GIANT meta-analysis. In the ethnicity-specific plots, the triangles are imputed SNPs, whereas the circles are based on the genotyped SNPs; in the meta-analysis all points are imputed. The color coding of the plot is as follows: orange/pink/dark orange/red for BMI imputed +/-0.5Mb of previously-reported BMI variant/typed +/-0.5Mb of variant/actual imputed variant/actual typed variant; light blue/light green/dark blue/dark green for adipose-related trait; magenta/purple/dark magenta/dark purple both a BMI and an adipose-related variant. (A) BMI non-Hispanic whites,  $\lambda_{\text{typed}} = 1.20$ ,  $\lambda_{\text{imputed}} = 1.10$ ; (B) BMI Latinos,  $\lambda_{\text{typed}} = 1.10$ ,  $\lambda_{\text{imputed}} = 1.05$ ; (C) BMI East Asians,  $\lambda_{\text{typed}} = 1.05$ ,  $\lambda_{\text{imputed}} = 1.05$ ; (D) BMI African Americans,  $\lambda_{\text{typed}} = 1.00$ ,  $\lambda_{\text{imputed}} = 1.00$ ; (E) BMI South Asians,  $\lambda_{\text{typed}} = 1.00$ ,  $\lambda_{\text{imputed}} = 1.00$ ; (F) BMI GERA meta-analysis,  $\lambda = 1.11$ ; (G) BMI GERA+GIANT meta-analysis,  $\lambda = 1.07$ , (Manhattan in main text).

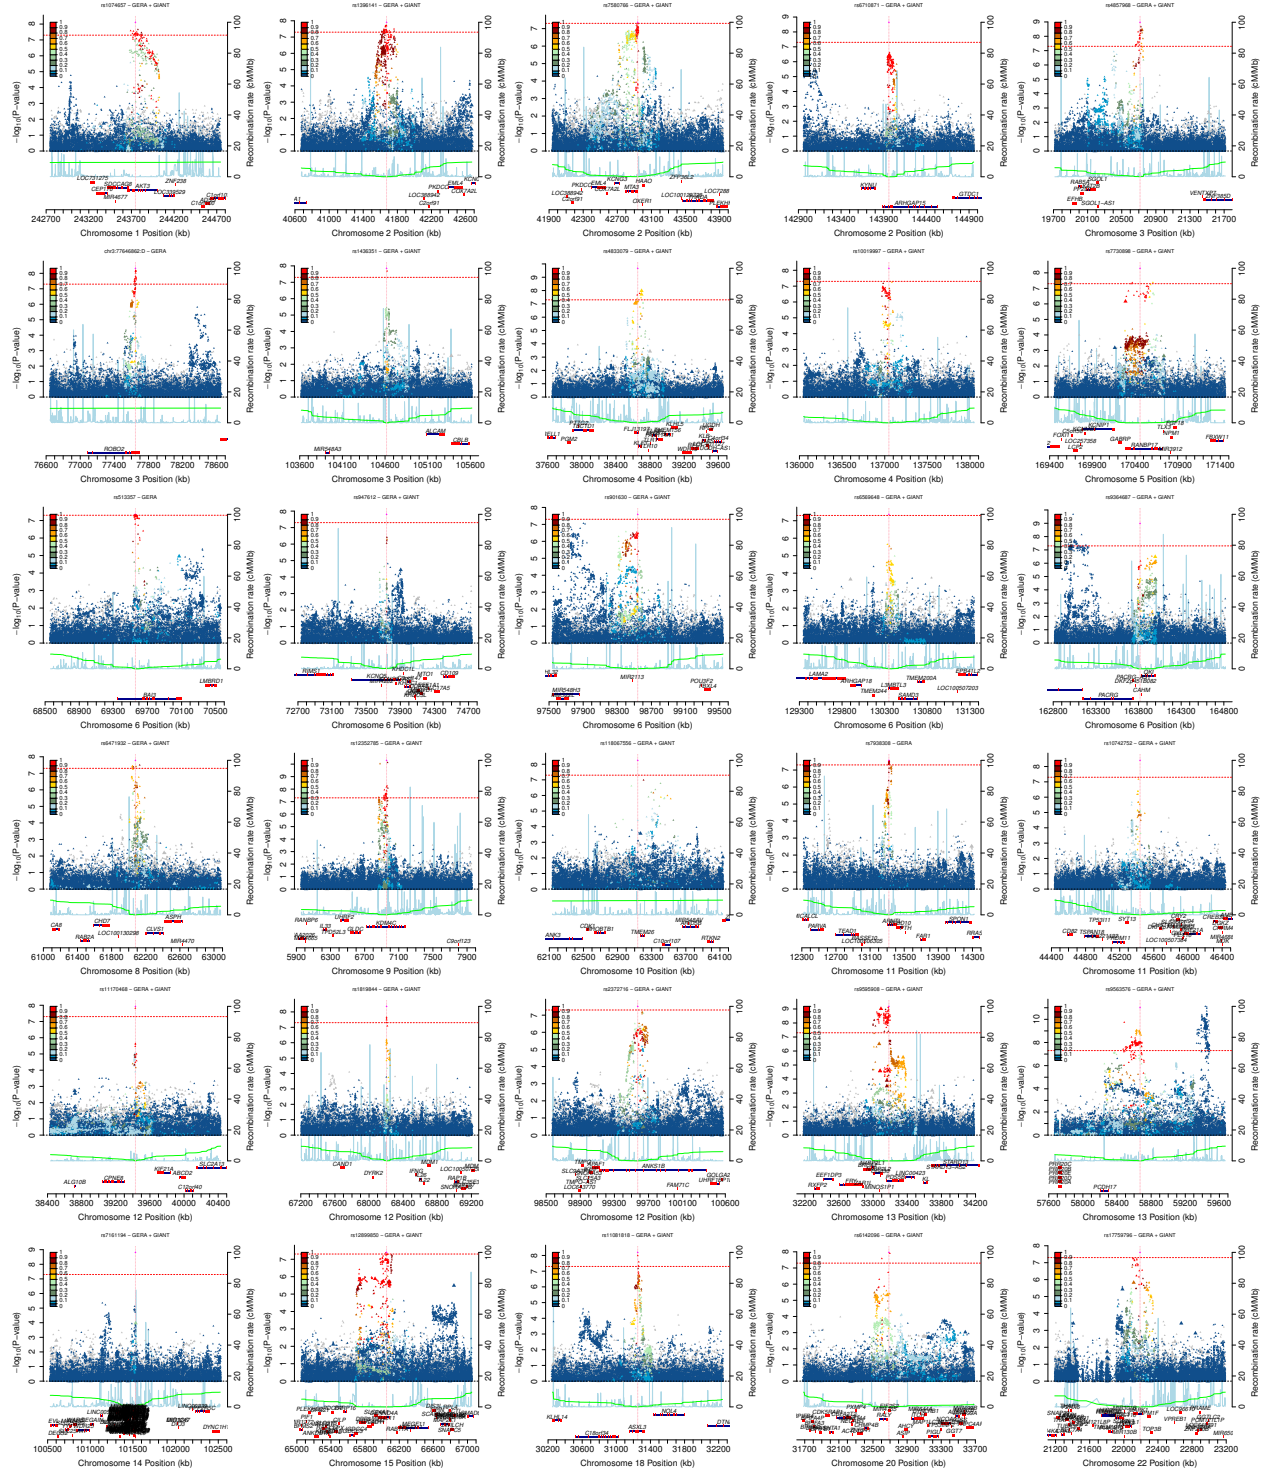

Figure S3. Locus plots.

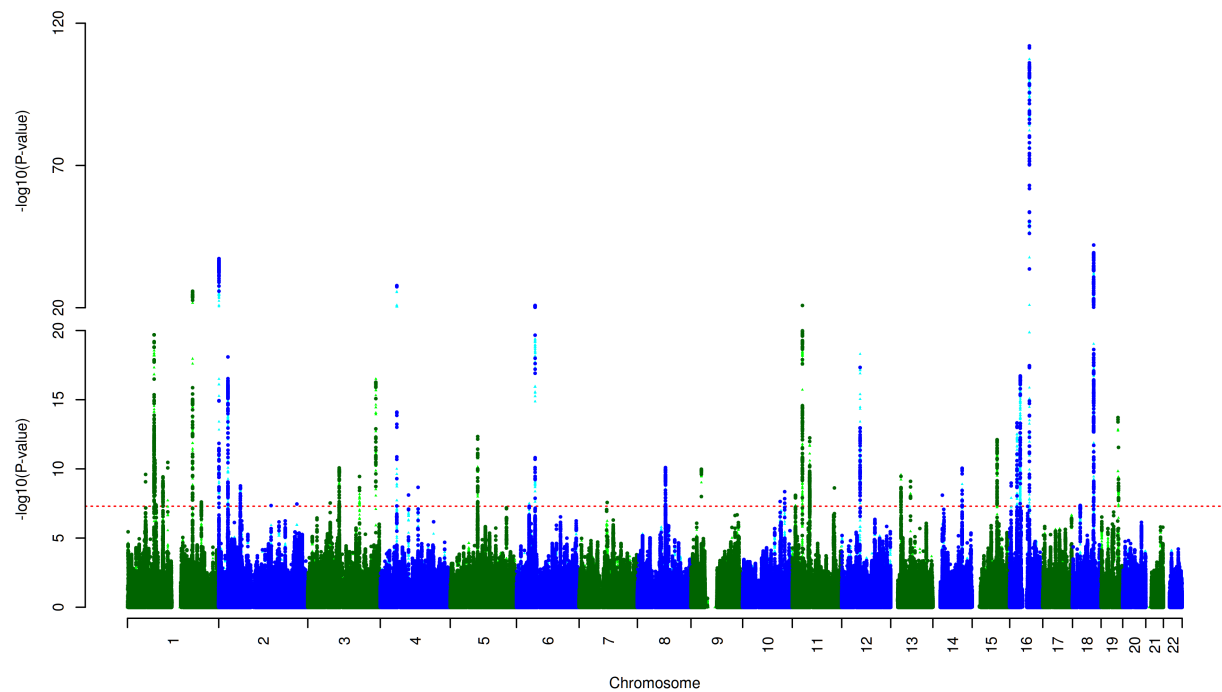

**Figure S4. Results from imputing the GIANT summary statistics from Hapmap to 1000 Genomes.** Dark green and dark blue points represent the typed markers, and are plotted above the light green and light blue points, which are the imputed markers. There are a few typed markers in chromosome X and Y because they mapped to autosomes in build 36, but to the X and Y chromosomes in build 37.

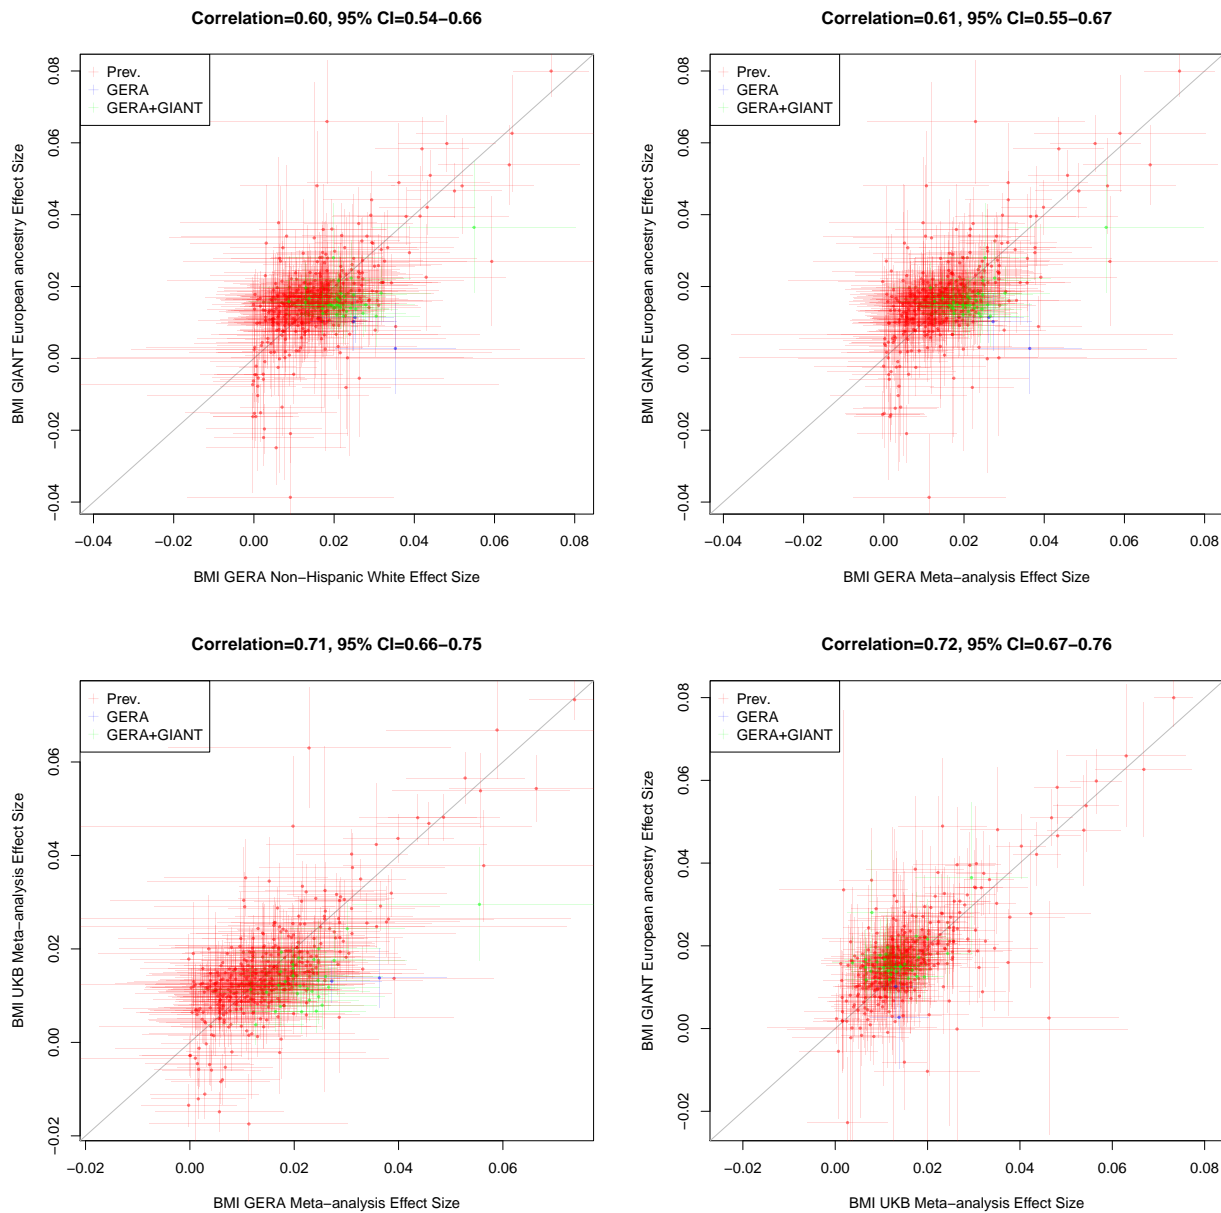

**Figure S5. Effect size comparisons amongst GERA, GIANT, and UKB.**

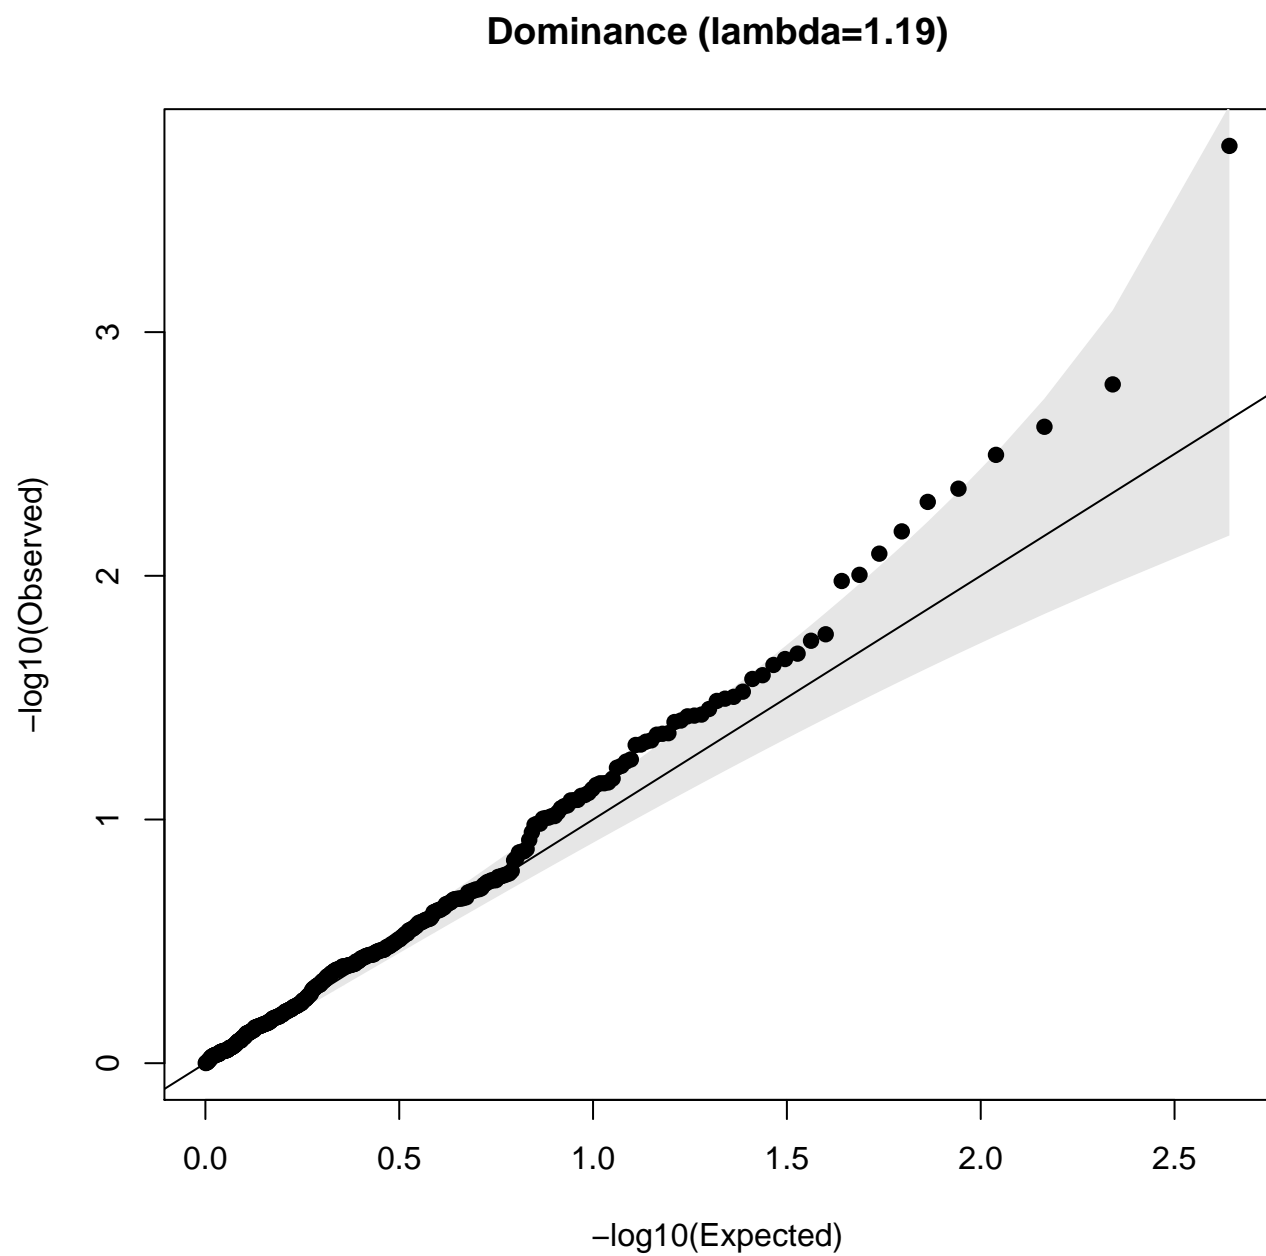

Figure S6. Dominance Q-Q plot of previously- and newly-identified SNPs

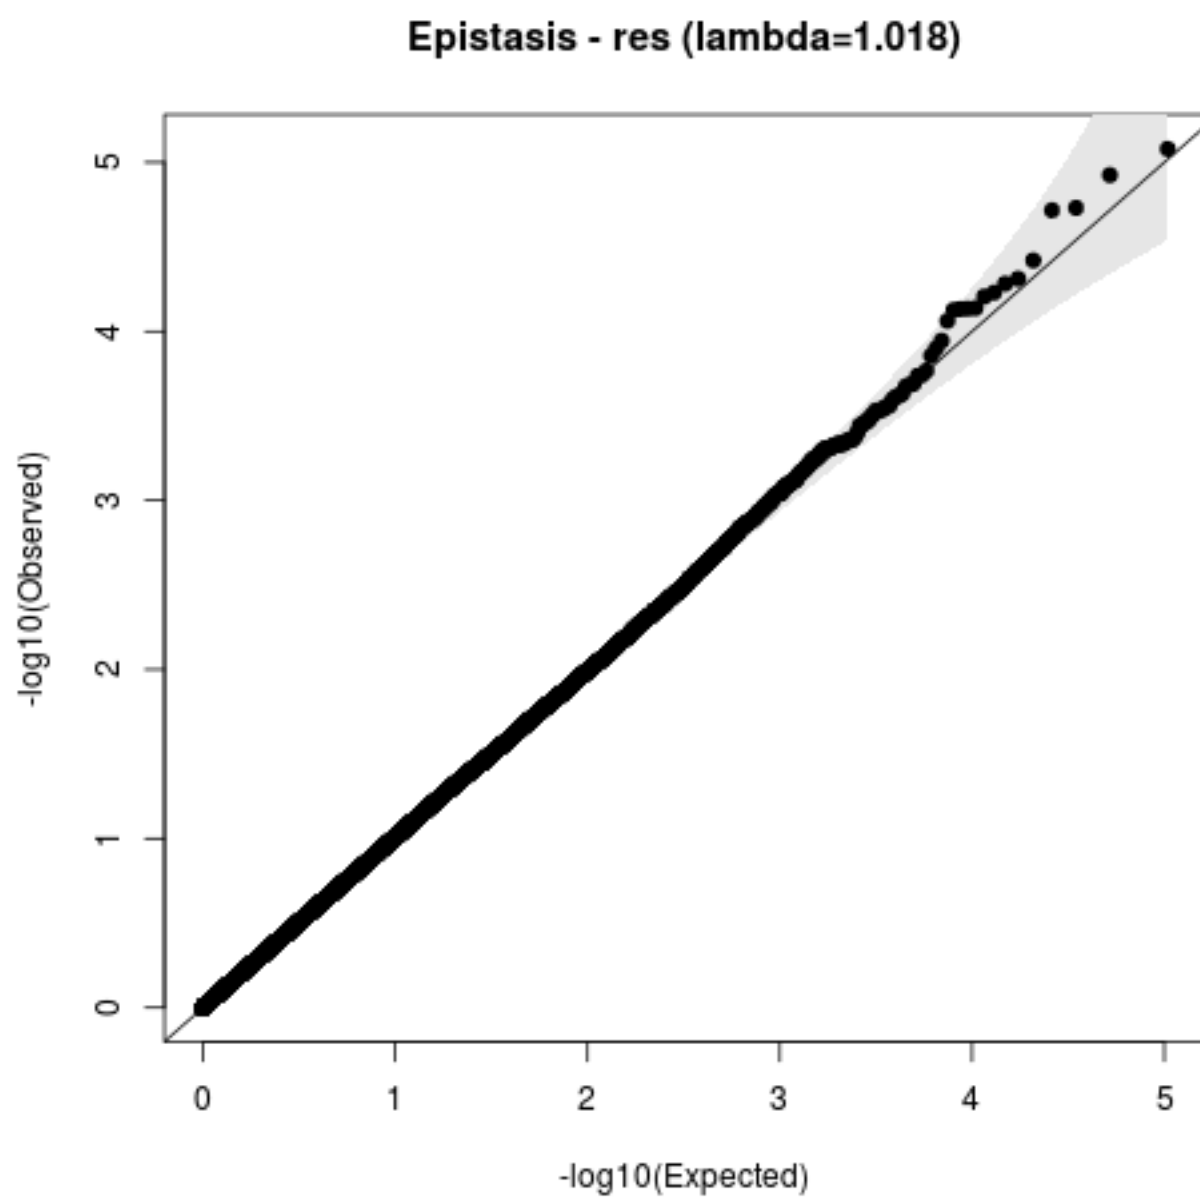

Figure S7. Epistasis Q-Q plot of previously- and newly-identified SNPs

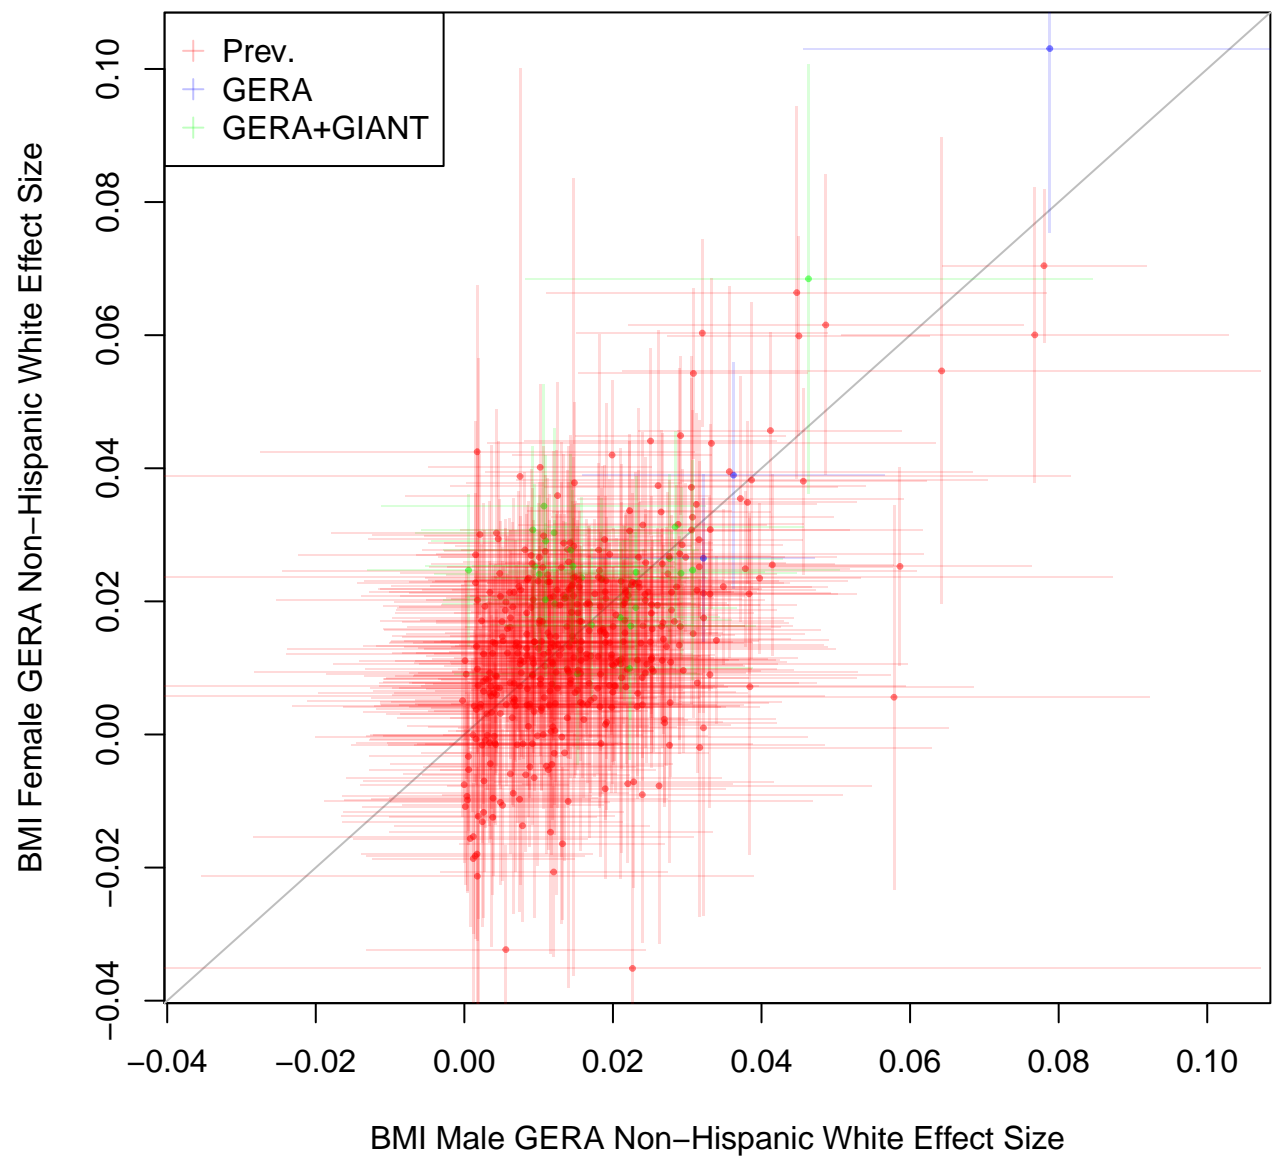

Figure S8. Sex effect size differences

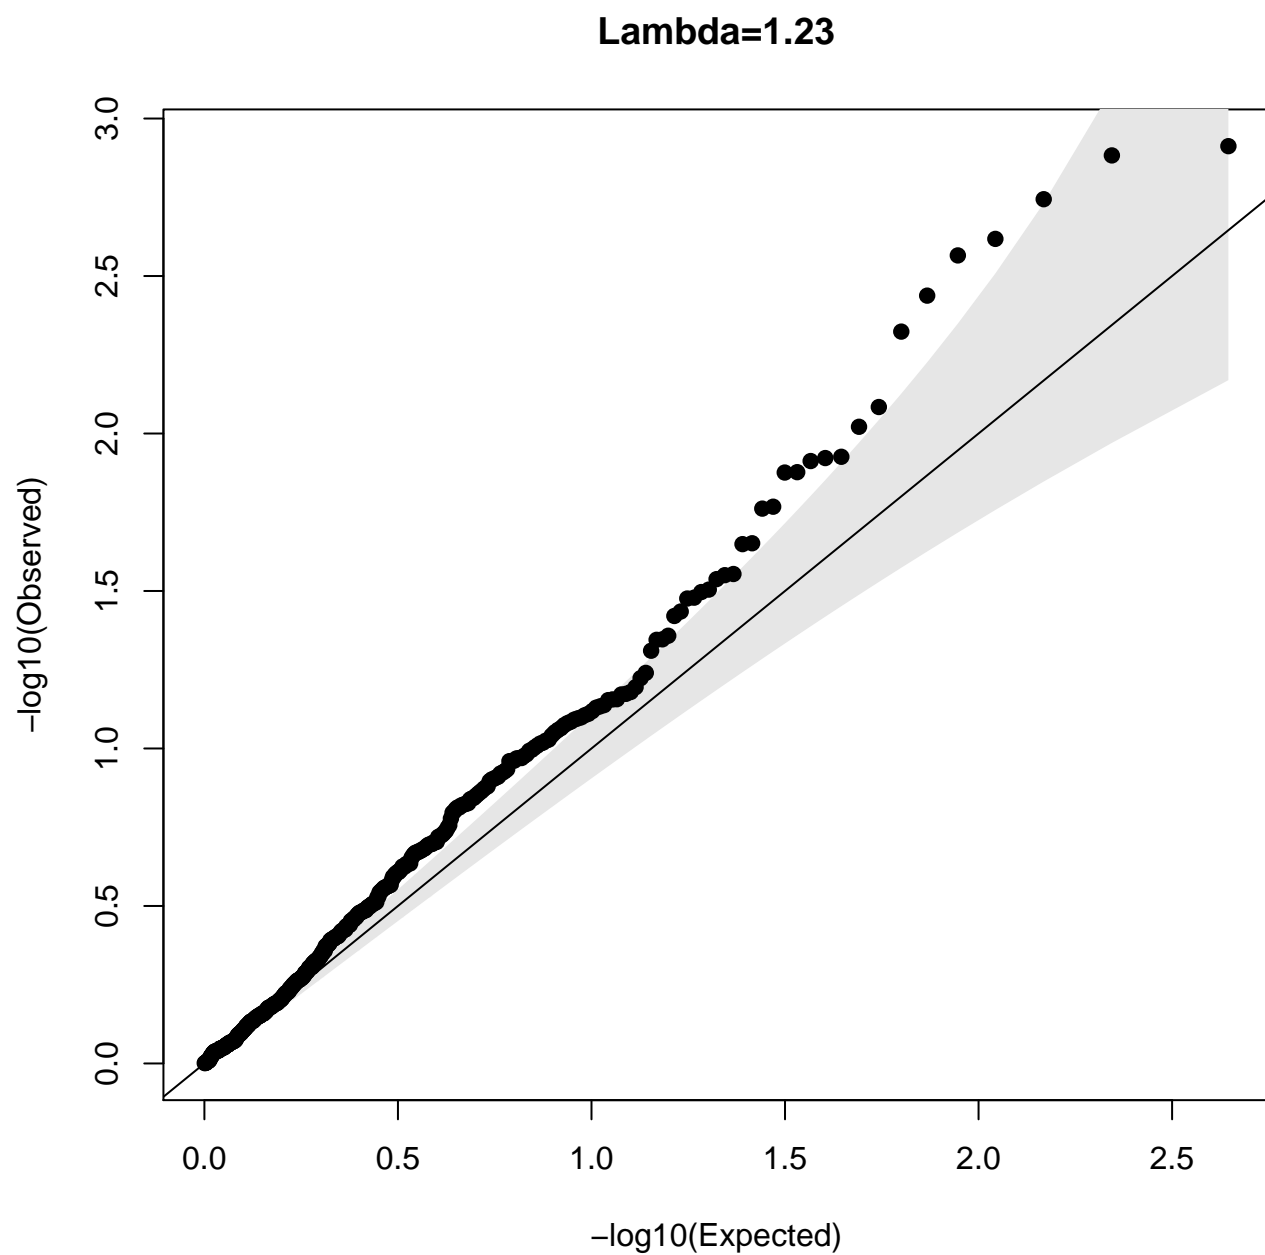

Figure S9. Sex effect size differences Q-Q plot at previously- and newly-identified lead BMI SNPs.

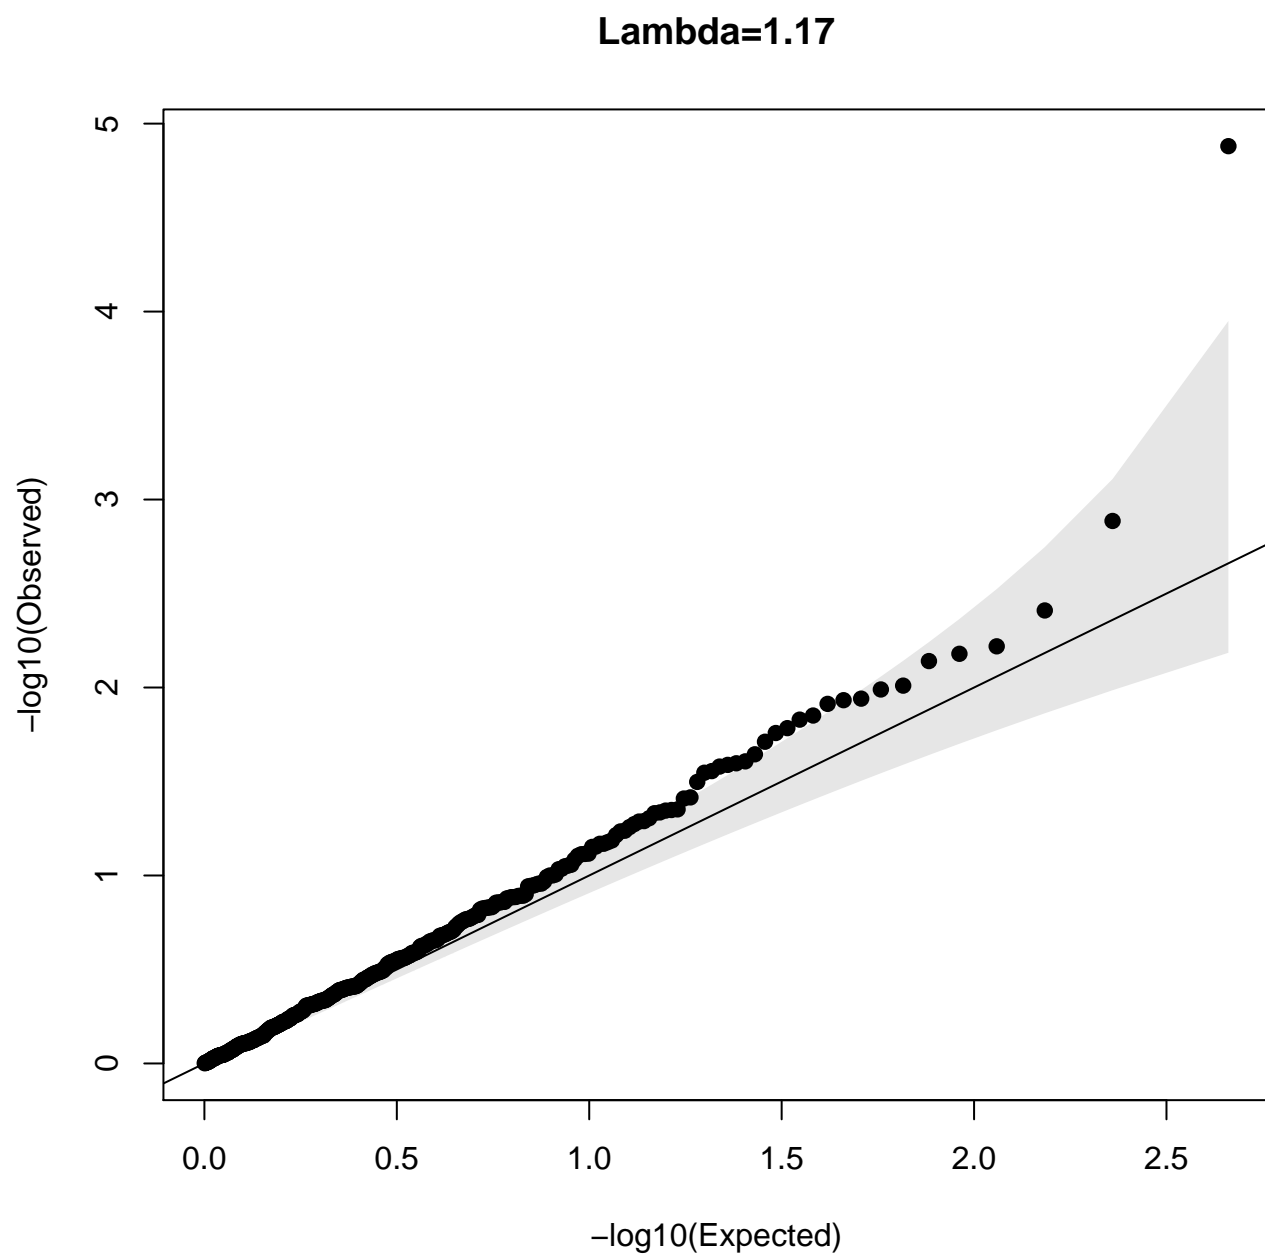

**Figure S10.** Age (stratified age  $\leq 50$  and age  $> 50$ ) differences Q-Q plot at previously- and newly-identified lead BMI SNPs.
